# Supplementary material for: Metal-free visible-light-induced hydroxy-perfluoroalkylation of conjugated olefins using enamine catalyst
Source: Royal Society of Chemistry journal article supplement (doi:10.1039/d2ra06679c), 2022-01-01

## *Supporting information*

### **Metal-free visible-light-induced hydroxy-perfluoroalkylation of conjugated olefins using enamine catalyst**

Koto Tagami, Yu Ofuji, Tadashi Kanbara and Tomoko Yajima

Department of Chemistry, Faculty of Science, Ochanomizu University, 2-1-1, Otsuka, Bunkyo-ku,  
Tokyo 112-8610, Japan

E-mail address: [yajima.tomoko@ocha.ac.jp](mailto:yajima.tomoko@ocha.ac.jp)

## Tables of Contents

|                                                                          |     |
|--------------------------------------------------------------------------|-----|
| 1. General information .....                                             | S3  |
| 2. General procedures.....                                               | S3  |
| 3. Optimization studies.....                                             | S4  |
| 3-1. Evaluation of oxygen equivalents.....                               | S4  |
| 3-2. Evaluation of <b>3</b> and <b>4</b> equivalents.....                | S5  |
| 3-3. Reactions with presynthesized enamine complex.....                  | S5  |
| 3-4. Evaluation of tertiary amine.....                                   | S6  |
| 3-5. Evaluation of photocatalyst.....                                    | S6  |
| 3-6. Limitation of the substrate scope.....                              | S7  |
| 3-7. Evaluation of <b>2</b> for <b>1a</b> .....                          | S7  |
| 3-8. Reaction using other CF <sub>2</sub> radical precursors.....        | S8  |
| 4. Stereochemistry .....                                                 | S8  |
| 4-1. Determination of diastereoselectivity by HPLC.....                  | S8  |
| 4-2. Stereo determination of compounds <b>5la</b> .....                  | S9  |
| 5. Gram scale reactions .....                                            | S10 |
| 6. Mechanistic studies .....                                             | S11 |
| 6-1. Labelled experiments .....                                          | S11 |
| 6-2. Titration experiment .....                                          | S12 |
| 6-3. Determination of binding stoichiometry .....                        | S14 |
| 6-4. Determination of the association constant ( $K_a$ ) .....           | S16 |
| 6-5. UV-Vis absorption spectra .....                                     | S18 |
| 6-6. Crude <sup>1</sup> H NMR chart analysis .....                       | S19 |
| 7. Characterization of the products .....                                | S21 |
| 8. References .....                                                      | S37 |
| 9. <sup>1</sup> H, <sup>13</sup> C and <sup>19</sup> F NMR spectra ..... | S38 |

## 1. General information

Unless otherwise noted, all reactions were performed under argon atmosphere.  $^1\text{H}$ ,  $^{13}\text{C}$  and  $^{19}\text{F}$  NMR spectra were recorded on a JEOL GSX-400 spectrometer (400 MHz for  $^1\text{H}$ , 126 MHz for  $^{13}\text{C}$ , and 376 MHz for  $^{19}\text{F}$ ), a JEOL ECX-500 spectrometer (500 MHz for  $^1\text{H}$  and 471 MHz for  $^{19}\text{F}$ ), or a BRUKER AVANCE 600 spectrometer (600 MHz for  $^1\text{H}$  and 151 MHz for  $^{13}\text{C}$ ) with  $\text{CDCl}_3$  as solvent, tetramethylsilane (TMS:  $\delta$  0 ppm for  $^1\text{H}$ ), chloroform-d ( $\text{CDCl}_3$ :  $\delta$  76.9 ppm for  $^{13}\text{C}$ ) and hexafluorobenzene ( $\text{C}_6\text{F}_6$ : -162.2 ppm for  $^{19}\text{F}$ ) as an internal standard. IR spectra were taken on SHIMADZU IRSpirit-T, and HRMS were obtained with a JEOL JMS-T100TD (DART-TOF), JEOL JMS-700 (EI), or BRUKER Compact (ESI). Precoated Merck Kieselgel 60 F254 and Kanto silica gel 60 (spherical neutral) were used for thin layer chromatography and flash chromatography, respectively. Visualization was accomplished by UV light (254 nm). All commercially available reagents and solvents were used as received, without further purification. Starting materials **1j**<sup>1</sup>, **1k**<sup>1</sup>, **1l**<sup>2</sup> and **1s**<sup>3</sup> were synthesized according to the previous literature. For irradiation, 2.5 W white light-emitting diodes (HLV3-22SW-1, CCS Inc.) were used (<https://www.ccs-grp.com/products/model/3803>).

## 2. General procedures

**Scheme S1.** General procedures for hydroxy-perfluoroalkylation.

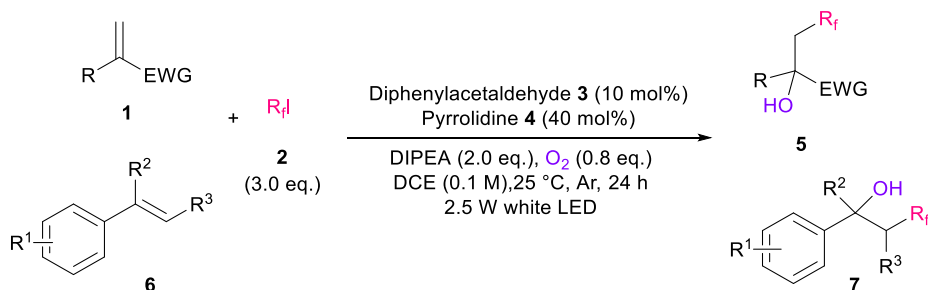

To an oven-dried 20 ml two-necked flask equipped with a magnetic stirrer bar was fitted with a septum and degassed through alternating vacuum evacuation/argon backfill ( $\times 10$ ) before dry 1,2-dichloroethane (2.5 ml) was added. Then oxygen (5.0 mL, 0.8 eq.), diphenylacetaldehyde (**3**, 4.4  $\mu\text{L}$ , 10 mmol), pyrrolidine (**4**, 8.4  $\mu\text{L}$ , 40 mol%), DIPEA (88  $\mu\text{L}$ , 2.0 eq.), electron-deficient olefin **1** or styrene **6** (0.25 mmol), and perfluoroalkyl iodide **2** (3.0 eq.) were added respectively. The mixture was stirred for 24 hours at 25°C under white LED irradiation. The resulting mixture was concentrated *in vacuo*. The residue was purified by column chromatography on silica gel to give **5** or **7** as a yellow oil or white solid.

### 3. Optimization studies

#### 3-1. Evaluation of oxygen equivalents

Table S1. Evaluation of oxygen equivalents

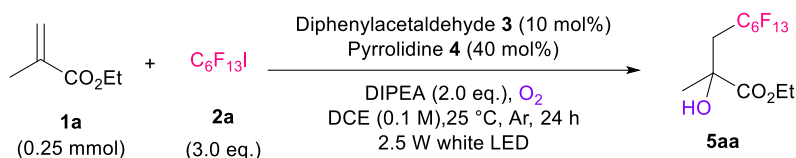

| Entry    | O <sub>2</sub>          | yield <sup>a</sup> |
|----------|-------------------------|--------------------|
| 1        | -                       | trace              |
| 2        | 0.5 eq. (3.1 mL)        | 58%                |
| 3        | 0.6 eq. (3.7 mL)        | 61%                |
| 4        | 0.7 eq. (4.3 mL)        | 68%                |
| <b>5</b> | <b>0.8 eq. (5.0 mL)</b> | <b>75%</b>         |
| 6        | 0.9 eq. (5.5 mL)        | 68%                |
| 7        | 1.0 eq. (6.1 mL)        | 53%                |
| 8        | 2.0 eq. (12.3 mL)       | 30%                |
| 9        | excess (50 mL)          | 9%                 |

<sup>a</sup>Yields based on <sup>19</sup>F NMR spectroscopy using benzotrifluoride as an internal standard.

The reaction does not proceed without oxygen (entry 1). With low amount of oxygen, oligomerization of **1a** was observed (entries 2-4). However, with high amount of oxygen, by-product derived from **4**, **2a**, and oxygen were obtained (Scheme S1), and only 9% of **5aa** were produced in the oxygen atmosphere (entry 9).<sup>4</sup>

Scheme S2. Side reaction from **4**, **2a**, and oxygen.<sup>4</sup>

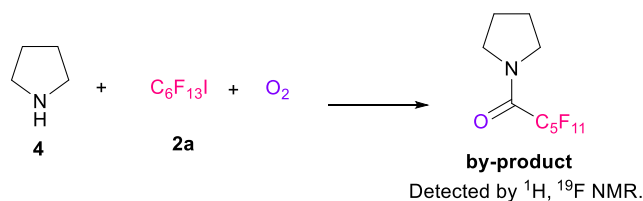



### 3–2. Evaluation of 3 and 4 equivalents

**Table S2.** Evaluation of adding quantity of 3 and 4

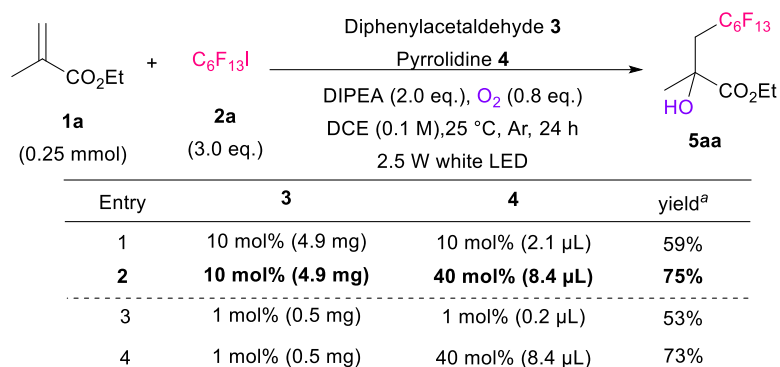

<sup>a</sup>Yields based on <sup>19</sup>F NMR spectroscopy using benzotrifluoride as an internal standard.

### 3–3. Reactions with pre-synthesized enamine

Enamine was synthesized according to the previous literature.<sup>5</sup>

**Table S3.** Reaction with pre-synthesized enamine.

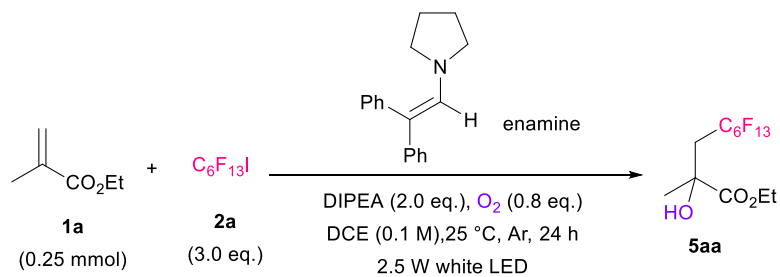

<sup>a</sup>Yields based on <sup>19</sup>F NMR spectroscopy using benzotrifluoride as an internal standard.

### 3-4. Evaluation of tertiary amine

Table S4. Evaluation of tertiary amine.

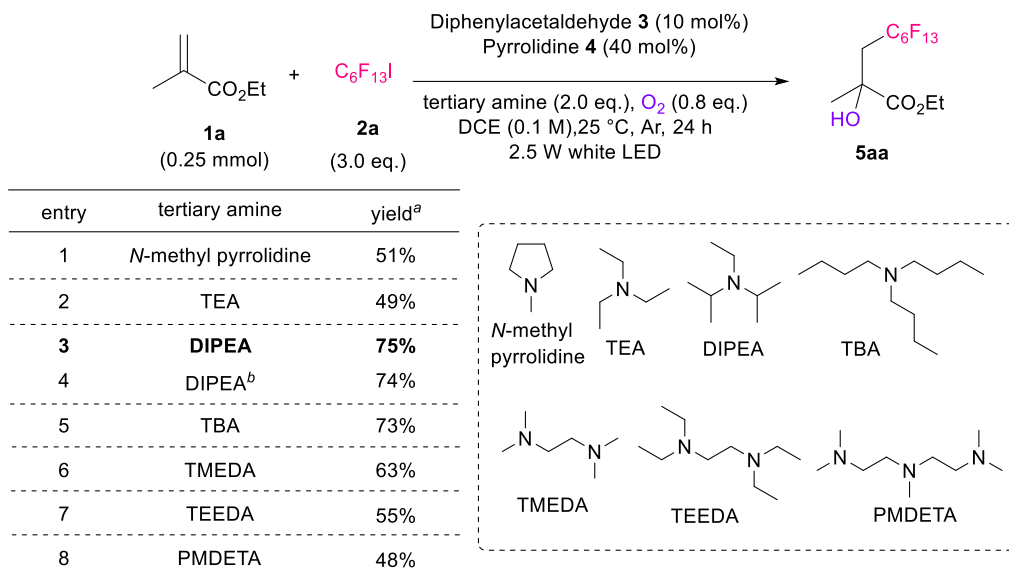

<sup>a</sup>Yields based on <sup>19</sup>F NMR spectroscopy using benzotrifluoride as an internal standard. <sup>b</sup>3.0 eq. of DIPEA.

### 3-5. Evaluation of photocatalyst

Table S5. Evaluation of photocatalyst.

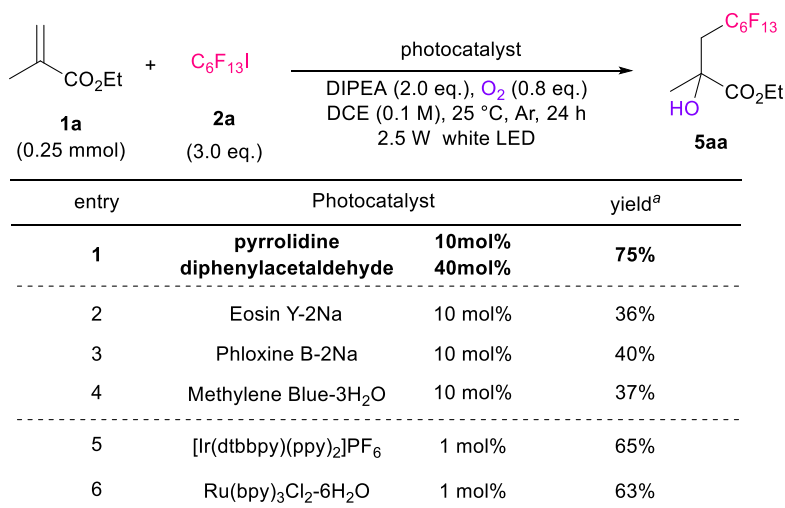

<sup>a</sup>Yields based on <sup>19</sup>F NMR spectroscopy using benzotrifluoride as an internal standard.

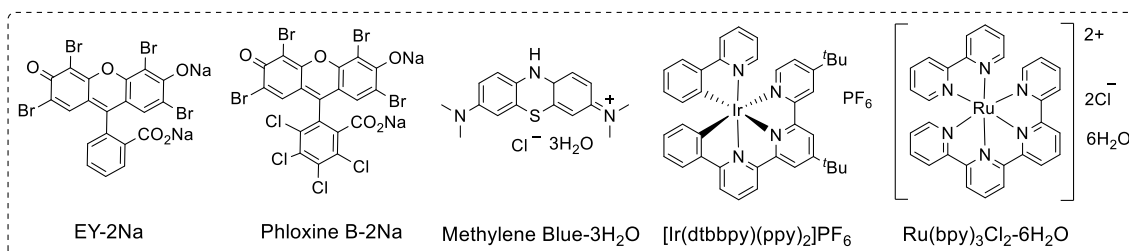

### 3–6. Limitation of the substrate scope

**Table S6.** Limitation of the substrate scope.

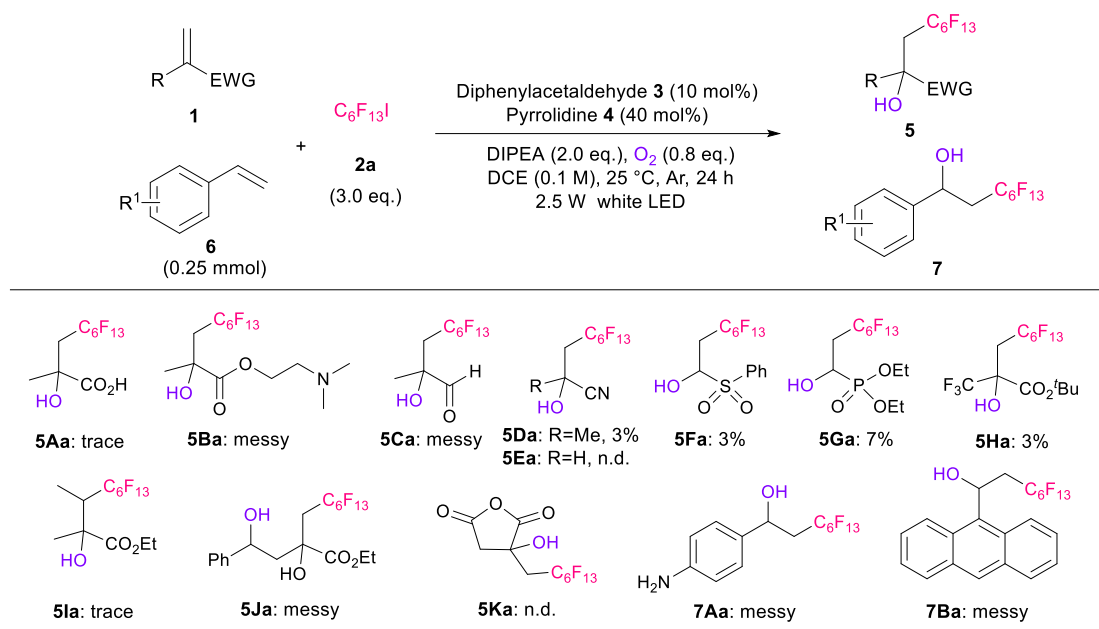

Yields based on <sup>19</sup>F NMR spectroscopy using benzotrifluoride as an internal standard.

### 3–7. Evaluation of **2** for **1a**

**Table S7.** Evaluation of **2** for **1a**.

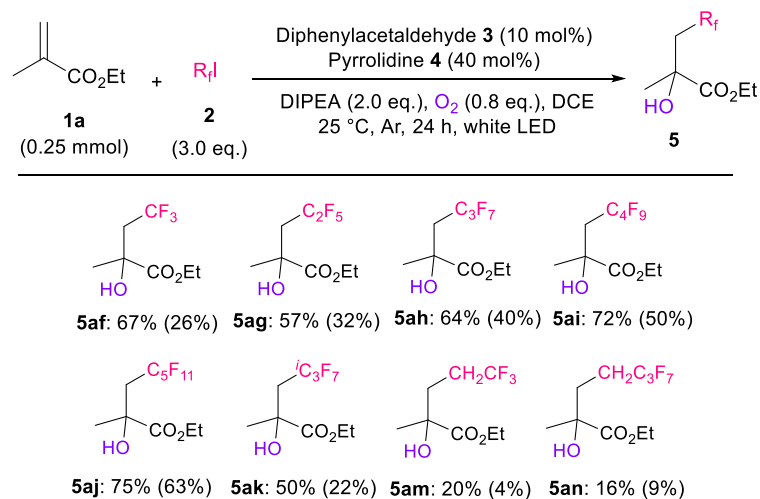

Yields based on <sup>19</sup>F NMR spectroscopy using benzotrifluoride as an internal standard; isolated yields are given in parentheses.

Owing to their low boiling point, the isolated yields were lower than the <sup>19</sup>F NMR yields.

### 3-8. Reaction using XCF<sub>2</sub>CO<sub>2</sub>Et

Table S8. Reaction using XCF<sub>2</sub>CO<sub>2</sub>Et.

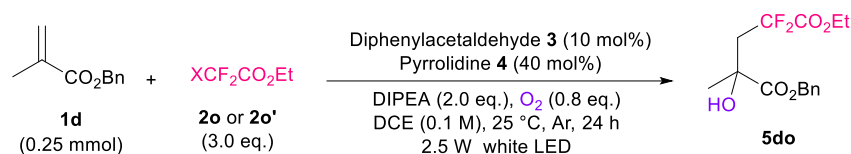

| Entry | 2                                                 | yield (%) <sup>a</sup> |
|-------|---------------------------------------------------|------------------------|
| 1     | <b>2o</b> : ICF <sub>2</sub> CO <sub>2</sub> Et   | 9                      |
| 2     | <b>2o'</b> : BrCF <sub>2</sub> CO <sub>2</sub> Et | n.r.                   |

<sup>a</sup>based on <sup>19</sup>F NMR spectroscopy using benzotrifluoride as an internal standard.

## 4. Stereochemistry

### 4-1. Determination of diastereoselectivity of compound **5la** by HPLC

HPLC: GL Science Inc. Inertsil<sup>®</sup> Diol column; detected at 294 nm; hexane/ethanol, 95/5; flow = 1.0 mL/min; retention times: 6.40 min, 6.92 min.

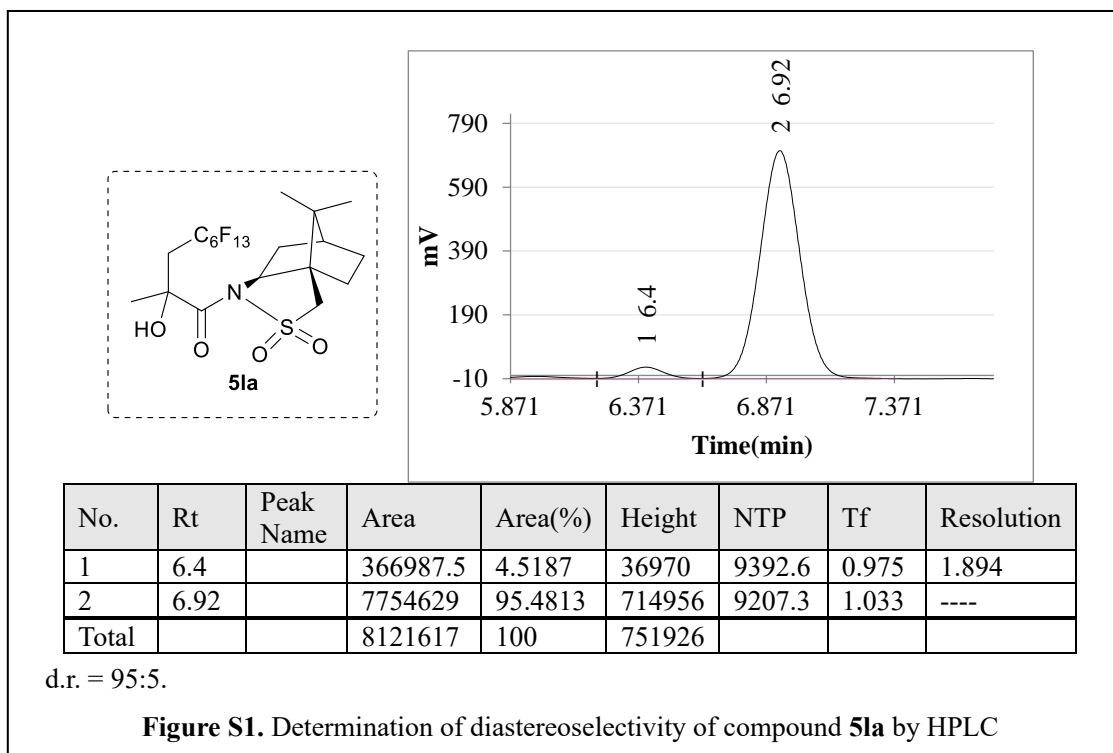

#### 4-2. Determination of stereochemistry (compounds **5la**).<sup>6</sup>

Stereochemistry of **5la** was determined by comparing the optical rotation of compound **5If'** with known compound.<sup>6</sup>

#### **Scheme S3.** Determination of stereochemistry of compound **5If'**

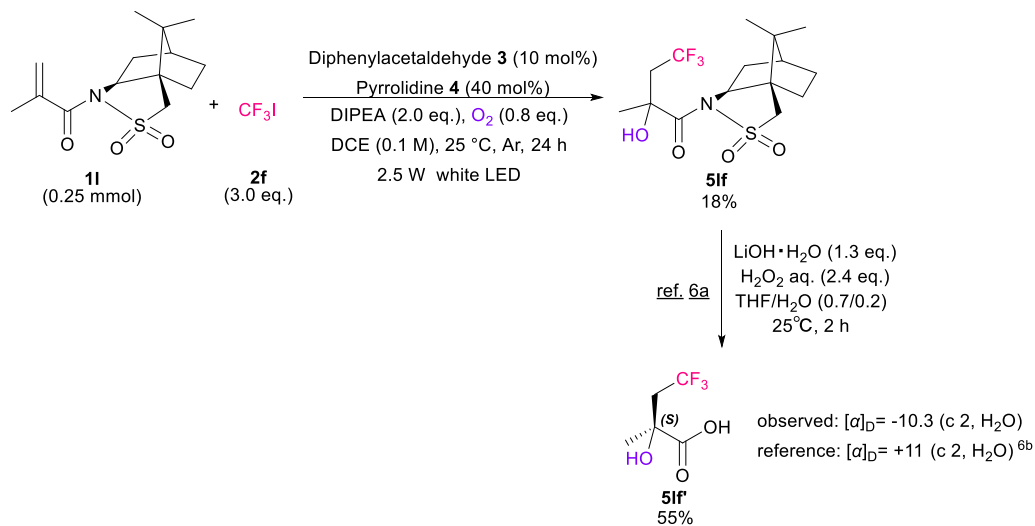

Yields based on <sup>19</sup>F NMR spectroscopy using benzotrifluoride as an internal standard.

## 5. Gram scale reaction

Scheme S4. Gram scale reaction.

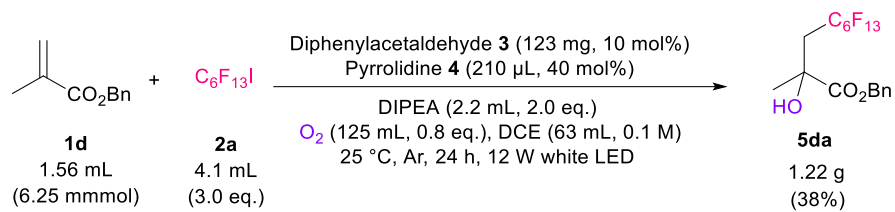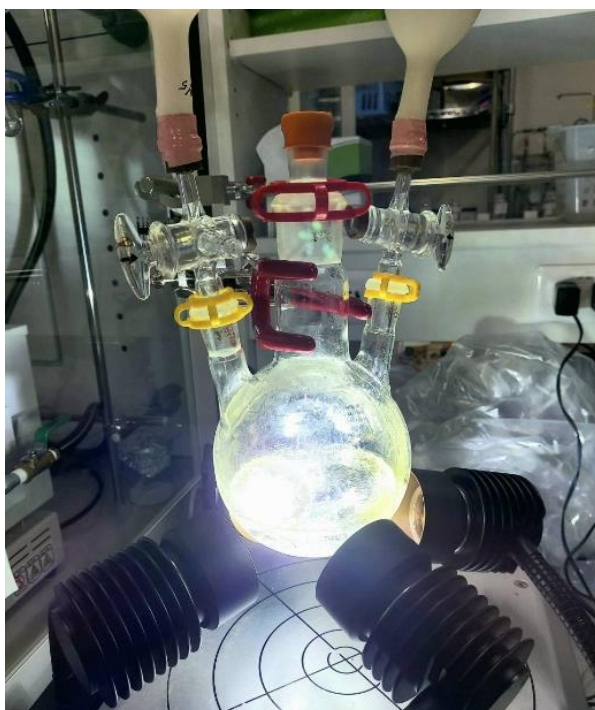

Figure S2. Gram scale reaction apparatus.

## 6. Mechanistic studies

### 6-1. Labelled experiments

Scheme S5. Labelled experiments with H<sub>2</sub><sup>18</sup>O or <sup>18</sup>O<sub>2</sub>.

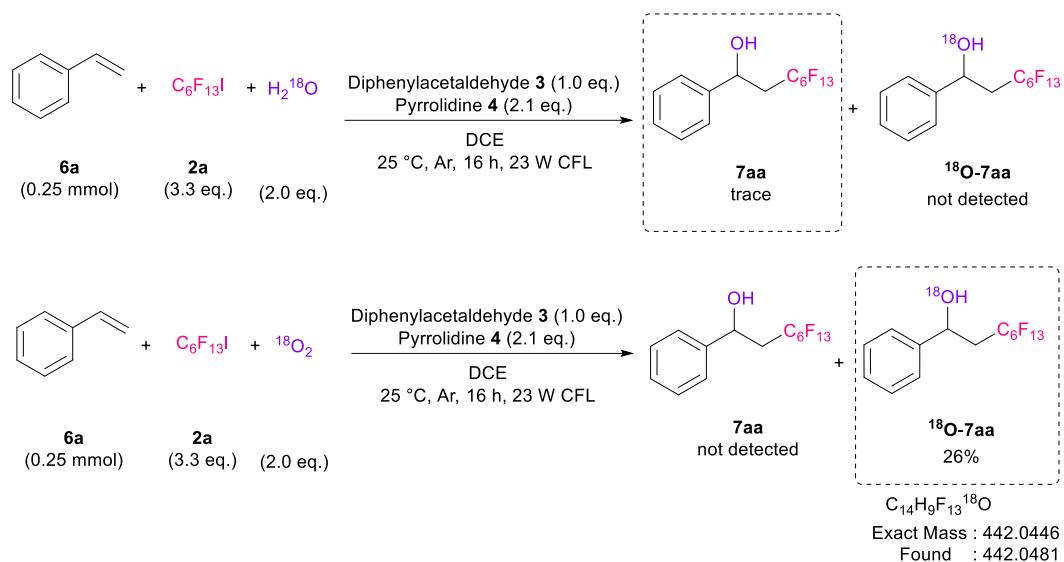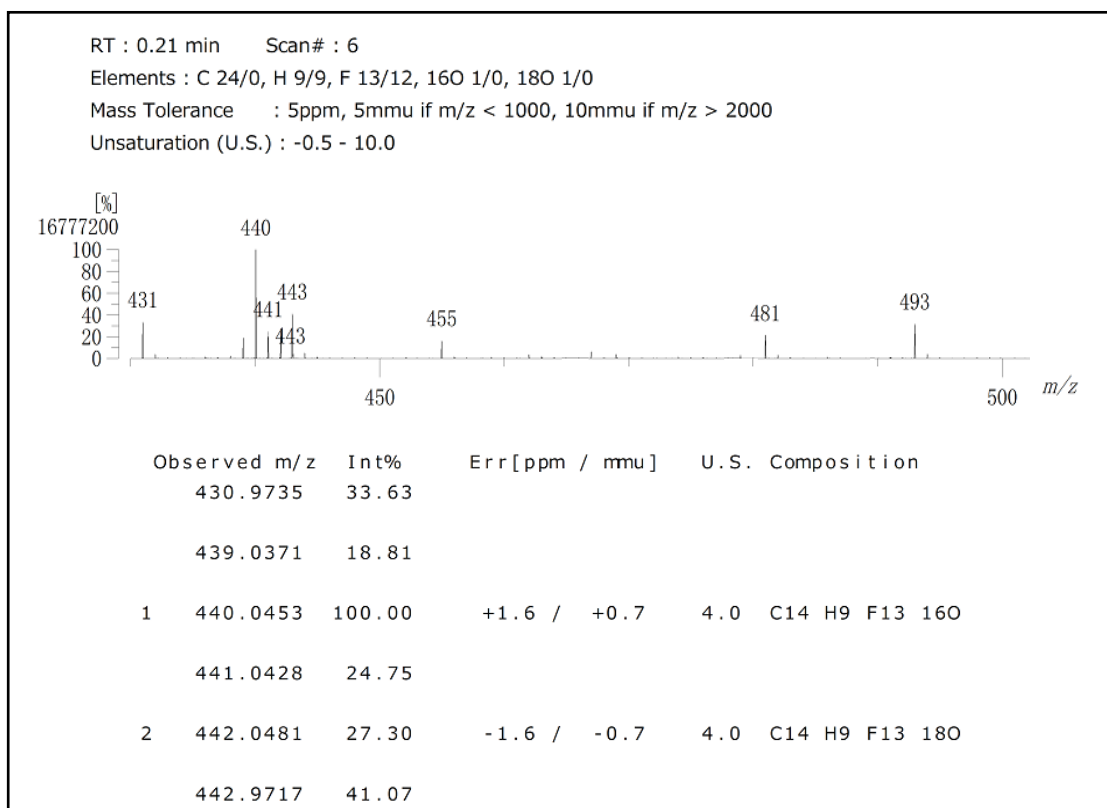

Figure S3. MS spectra of labelled experiments with or <sup>18</sup>O<sub>2</sub>.

## 6-2. Titration experiment<sup>7</sup>

### 6-2-1. Titration experiment of C<sub>6</sub>F<sub>13</sub>I with enamine

<sup>19</sup>F NMR spectra of seven samples of the mixtures of C<sub>6</sub>F<sub>13</sub>I (**2a**), diphenylacetaldehyde (**3**) and pyrrolidine (**4**) (**3**:**4** = 1:1) in CDCl<sub>3</sub> were recorded (hexafluorobenzene (C<sub>6</sub>F<sub>6</sub>: -162.2 ppm for <sup>19</sup>F) was used as an internal standard). The amount of **2a** was kept constant at 0.025 mmol while that of **3** and **4** was varied from 0 to 0.125 mmol, respectively. The molar ratio of **2a**: (**3**+**4**) were 1:0, 1:1, 1:2, 1:3, 1:4, 1:7, and 1:10.

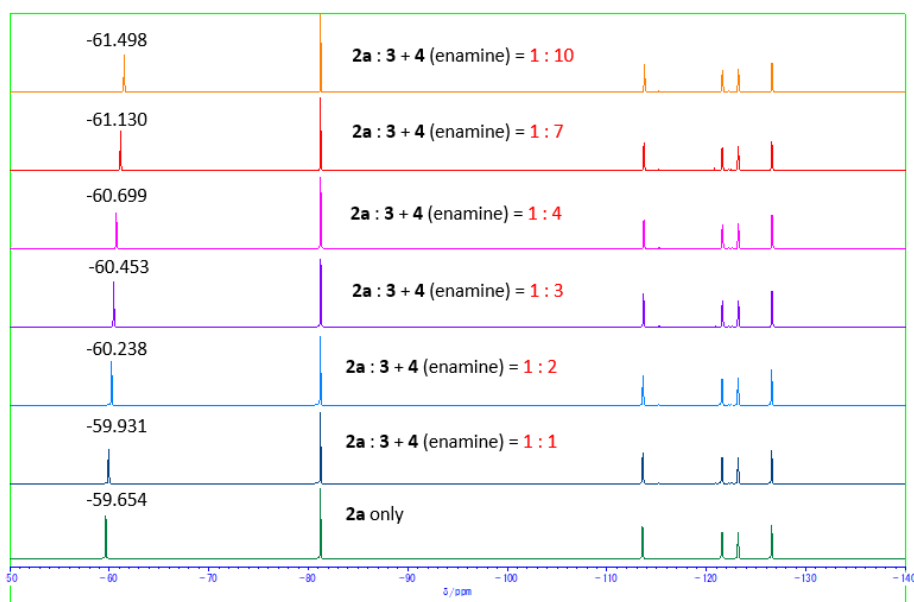

Figure S4-1. <sup>19</sup>F Titration experiment of C<sub>6</sub>F<sub>13</sub>I with enamine.

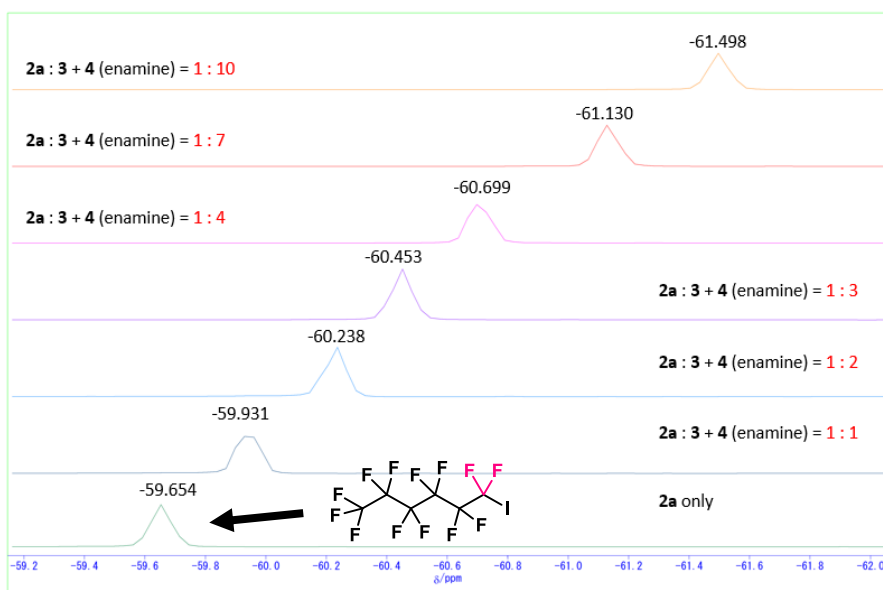

Figure S4-2. <sup>19</sup>F Titration experiment of C<sub>6</sub>F<sub>13</sub>I with enamine.



### 6-2-2. Titration experiment of C<sub>6</sub>F<sub>13</sub>I with DIPEA

<sup>19</sup>F NMR spectra of seven samples of the mixtures of C<sub>6</sub>F<sub>13</sub>I (**2a**) and DIPEA in CDCl<sub>3</sub> were recorded (hexafluorobenzene (C<sub>6</sub>F<sub>6</sub>: -162.2 ppm for <sup>19</sup>F) was used as an internal standard). The amount of **2a** was kept constant at 0.025 mmol while that of DIPEA was varied from 0 to 0.25 mmol. The molar ratio of **2a**: DIPEA were 1:0, 1:1, 1:2, 1:3, 1:4, 1:5, and 1:10.

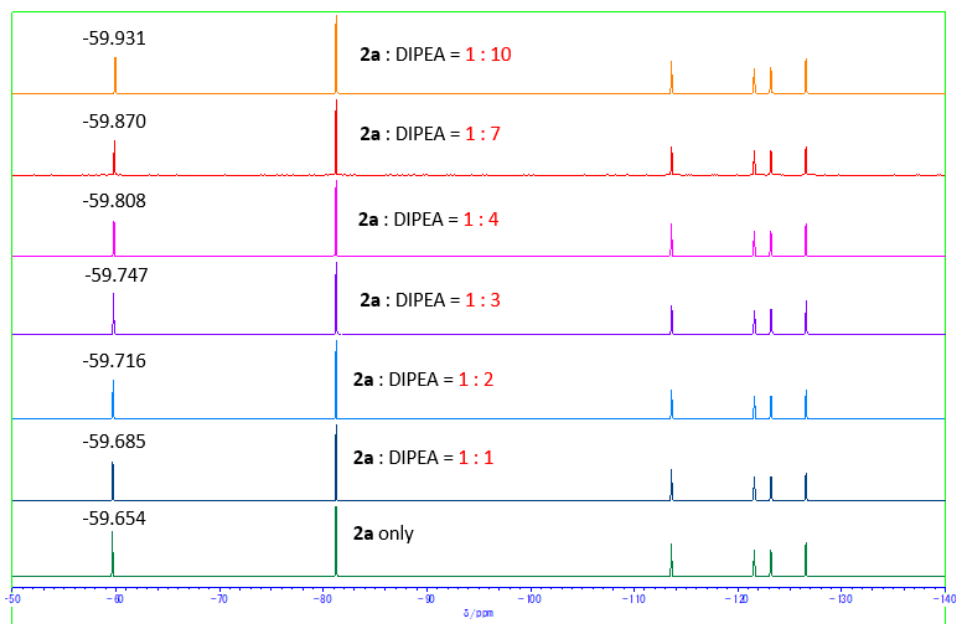

Figure S5-1. <sup>19</sup>F Titration experiment of C<sub>6</sub>F<sub>13</sub>I with DIPEA.

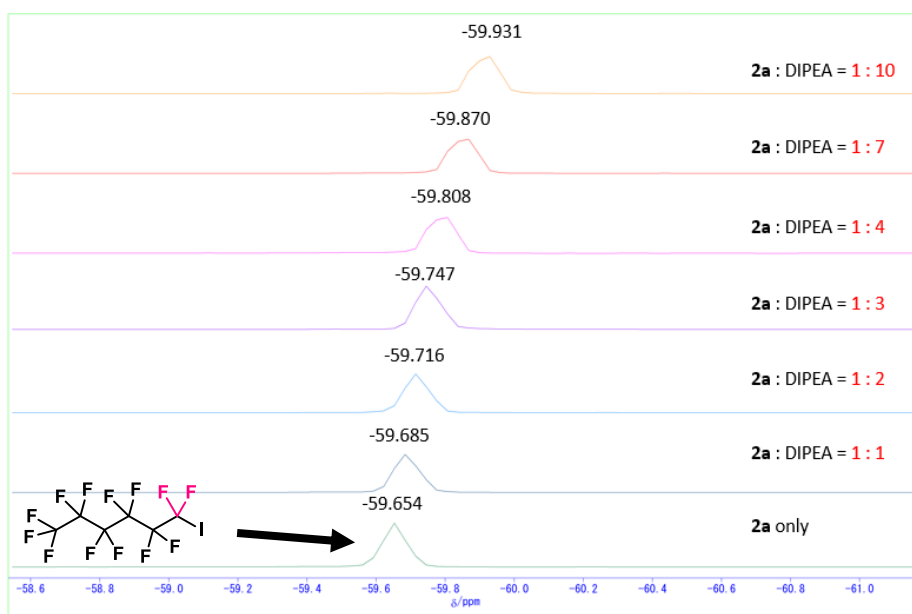

Figure S5-2. <sup>19</sup>F Titration experiment of C<sub>6</sub>F<sub>13</sub>I with DIPEA.

The -CF<sub>2</sub>I upfield-shift of the <sup>19</sup>F NMR was observed with the addition of enamine or DIPEA into **2a**. It indicated the formation of halogen-bonding between **2a** and enamine or DIPEA. Figure S4 shows a clearer upfield-shift than Figure S5, indicating that the interaction between **2a** and enamine was stronger than that of DIPEA.

### 6-3. Determination of binding stoichiometry

Determination of binding stoichiometry experiments were conducted by Job's plot analysis<sup>8</sup> according to the previous literature.<sup>7</sup>

#### 6-3-1. Determination of binding stoichiometry between C<sub>6</sub>F<sub>13</sub>I and enamine

<sup>19</sup>F NMR spectra of eleven samples of the mixtures of C<sub>6</sub>F<sub>13</sub>I (**2a**), diphenylacetaldehyde (**3**) and pyrrolidine (**4**) (**3:4** = 1:1) in CDCl<sub>3</sub> were recorded (hexafluorobenzene (C<sub>6</sub>F<sub>6</sub>: -162.2 ppm for <sup>19</sup>F) was used as an internal standard). The total amount of **2a**, **3**, and **4** were kept constant at 0.25 mmol (0.5 M), while the amount of **2a** was varied from 0 to 0.25 mmol (0–0.5 M). The molar ratio of **2a**: {**2a**+**3**+**4**} were 0.0, 0.1, 0.2, 0.3, 0.4, 0.5, 0.6, 0.7, 0.8, 0.9, 1.0. <sup>19</sup>F NMR for each sample was recorded to measure the change in chemical shift for the F of CF<sub>2</sub>I. The stoichiometry was determined by plotting ratios of [2a]×Δδ against ratios of [2a]/ [2a+3+4]. Figure S6 show the maximum at ratio [2a]/[2a+3+4] = 0.5, which meant a 1:1 complex ratio between **2a** and enamine.

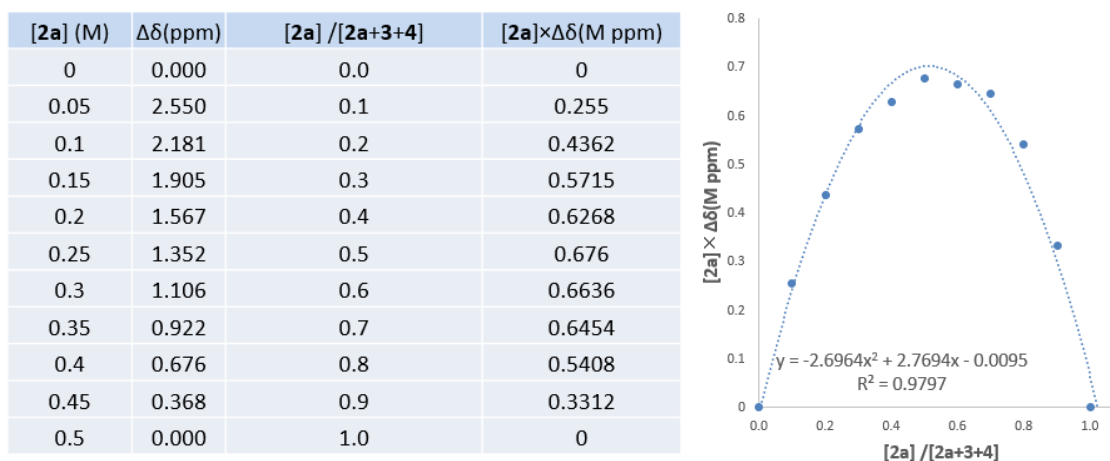

Figure S6. Job's plot between C<sub>6</sub>F<sub>13</sub>I and enamine.

### 6-3-2. Determination of binding stoichiometry between C<sub>6</sub>F<sub>13</sub>I and DIPEA

<sup>19</sup>F NMR spectra of eleven samples of the mixtures of C<sub>6</sub>F<sub>13</sub>I (**2a**), DIPEA in CDCl<sub>3</sub> were recorded (hexafluorobenzene (C<sub>6</sub>F<sub>6</sub>: -162.2 ppm for <sup>19</sup>F) was used as an internal standard). The total amount of **2a** and DIPEA were kept constant at 0.25 mmol (0.5 M), while the amount of **2a** was varied from 0 to 0.25 mmol (0–0.5 M). The molar ratio of **2a**: {**2a**+DIPEA} were 0.0, 0.1, 0.2, 0.3, 0.4, 0.5, 0.6, 0.7, 0.8, 0.9, 1.0. <sup>19</sup>F NMR for each sample was recorded to measure the change in chemical shift for the F of CF<sub>2</sub>I. The stoichiometry was determined by plotting ratios of [**2a**]×Δδ against ratios of [**2a**]/ [**2a**+DIPEA]. Figure S7 show the maximum at ratio [**2a**]/ [**2a**+ DIPEA] = 0.5, which meant a 1:1 complex ratio between **2a** and DIPEA.

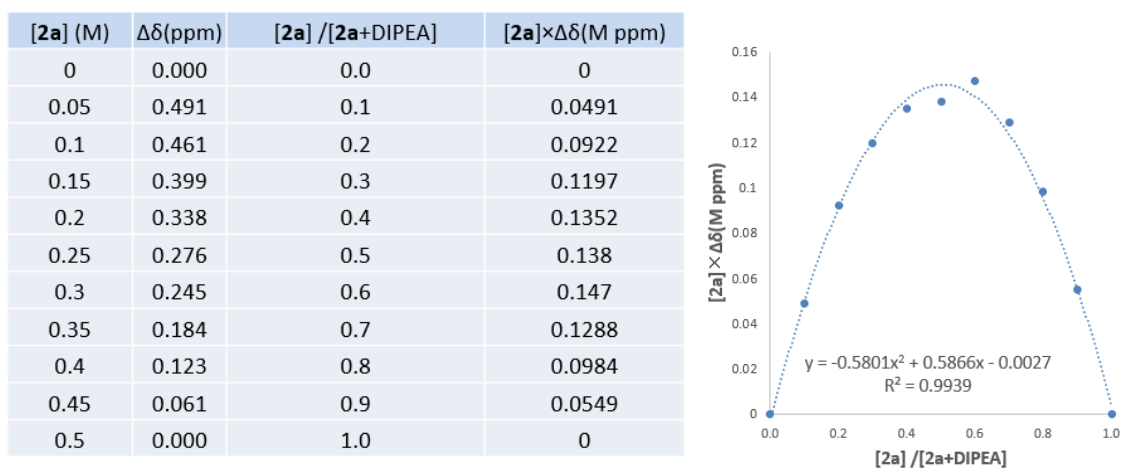

#### 6-4. Determination of the association constant ( $K_a$ )

The association constant ( $K_a$ ) was calculated using Hanna and Ashbaugh's method,<sup>9</sup> according to the previous literature.<sup>7</sup>

##### 6-4-1. Determination of the association constant ( $K_a$ ) between $C_6F_{13}I$ and enamine

$^{19}F$  NMR spectra of six samples of the mixtures of  $C_6F_{13}I$  (**2a**), diphenylacetaldehyde (**3**) and pyrrolidine (**4**) (**3:4** = 1:1) in  $CDCl_3$  were recorded (hexafluorobenzene ( $C_6F_6$ : -162.2 ppm for  $^{19}F$ ) was used as an internal standard). The amount of **2a** was kept constant at 0.025 mmol while that of **3** and **4** was varied from 0.0125 to 0.125 mmol, respectively. The molar ratio of **2a**: (**3+4**) were 1:1, 1:2, 1:3, 1:4, 1:7, and 1:10.  $^{19}F$  NMR for each sample was recorded to measure the change in chemical shift for the F of  $CF_2I$ .

| <b>3 + 4</b><br>(mmol) | <b>3 + 4</b><br>(mol/L) | <b>1/3 + 4</b><br>(L/mol) | $\Delta\delta$<br>(ppm) | $1/\Delta\delta$<br>(ppm <sup>-1</sup> ) |
|------------------------|-------------------------|---------------------------|-------------------------|------------------------------------------|
| 0.25                   | 0.42                    | 2.4                       | 1.844                   | 0.5423                                   |
| 0.175                  | 0.29                    | 3.4                       | 1.476                   | 0.6775                                   |
| 0.1                    | 0.17                    | 6.0                       | 1.045                   | 0.9569                                   |
| 0.075                  | 0.13                    | 8.0                       | 0.799                   | 1.2516                                   |
| 0.05                   | 0.08                    | 12.0                      | 0.584                   | 1.7123                                   |
| 0.025                  | 0.04                    | 24.0                      | 0.277                   | 3.6101                                   |

$$K = 0.1377/1.1419 \\ = \mathbf{0.97}$$

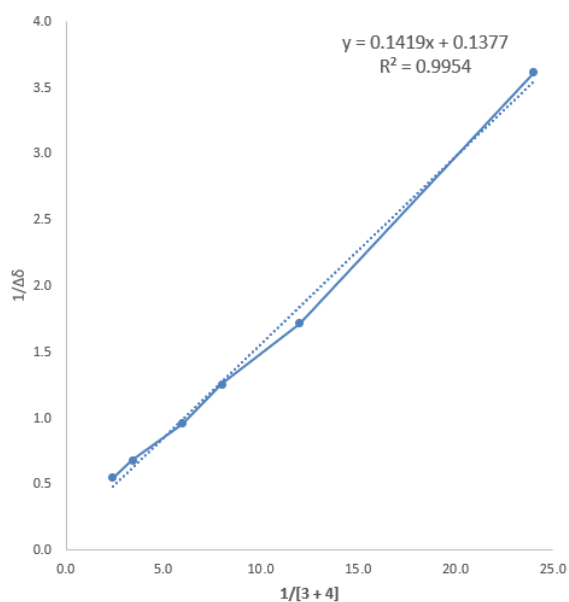

**Figure S8.** association constant ( $K_a$ ) between  $C_6F_{13}I$  and enamine

The association constant of **2a** and enamine ( $K_{enamine}$ ) was calculated to be 0.97 ( $K_{enamine} = 0.97 M^{-1}$ ).

#### 6-4-2. Determination of the association constant ( $K_a$ ) between $C_6F_{13}I$ and DIPEA

$^{19}F$  NMR spectra of six samples of the mixtures of  $C_6F_{13}I$  (**2a**) and DIPEA in  $CDCl_3$  were recorded (hexafluorobenzene ( $C_6F_6$ : -162.2 ppm for  $^{19}F$ ) was used as an internal standard). The amount of **2a** was kept constant at 0.025 mmol while that of DIPEA was varied from 0.025 to 0.25 mmol. The molar ratio of **2a**:DIPEA were 1:1, 1:2, 1:3, 1:4, 1:7, and 1:10.  $^{19}F$  NMR for each sample was recorded to measure the change in chemical shift for the F of  $CF_2I$ .

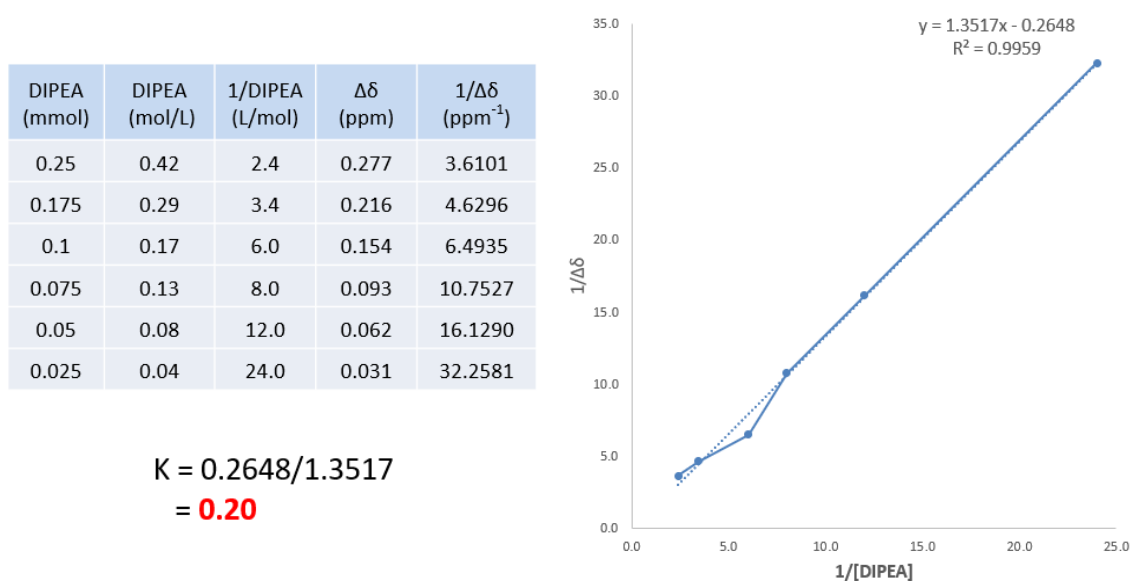

**Figure S9.** association constant ( $K_a$ ) between  $C_6F_{13}I$  and DIPEA

The association constant of **2a** and DIPEA ( $K_{DIPEA}$ ) was calculated to be 0.20 ( $K_{DIPEA} = 0.20 M^{-1}$ ).

A comparison of the association constant ( $K_a$ ) in Figure S8 and S9 suggested that enamine interacted with  $C_6F_{13}I$  more effectively than DIPEA.

### 6-5. UV-Vis absorption spectra

Optical absorption spectra were recorded in 1,2-dichloroethane solution (0.1 M) in 1 mm path quartz cuvettes using a JASCO V-650 UV-visible Spectrophotometer.

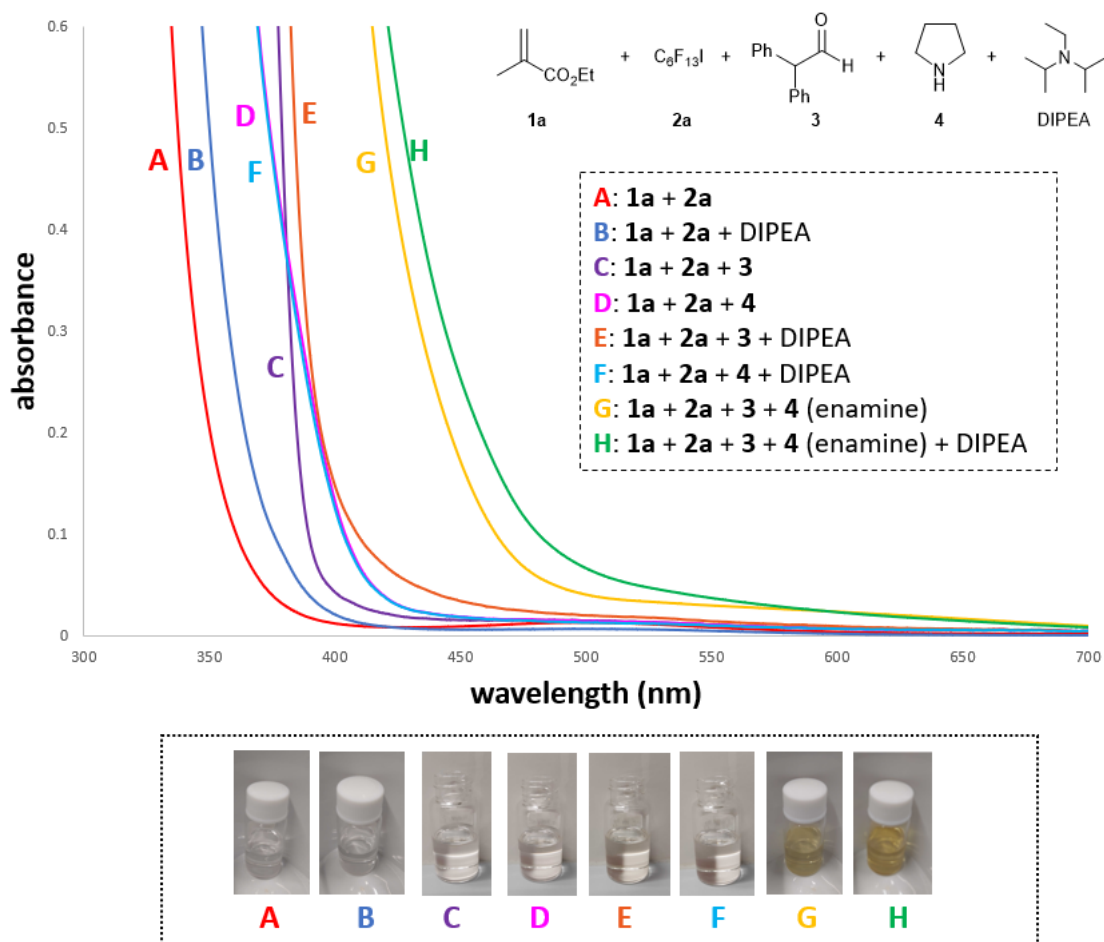

**Figure S10.** UV-Vis absorption spectra and visual appearance of EDA complexation.

The biggest long-wavelength shifted peak was observed for the solution **G** and **H** (with both **3** and **4**; enamine), as well as a visual appearance (yellow colour). It indicated that EDA complex was formed between **2a** and enamine. On the other hand, there are no colour change and little peak shift for solution **B–F** (with only **DIPEA**, **3**, or **4**) compared to solution **A**. This result excludes the possibility of the EDA complexation between **DIPEA**, **3**, or **4** with **2a**, respectively.

## 6-6. Crude $^1\text{H}$ NMR

### 6-6-1. Crude $^1\text{H}$ NMR compared with **3**, **4** and enamine.

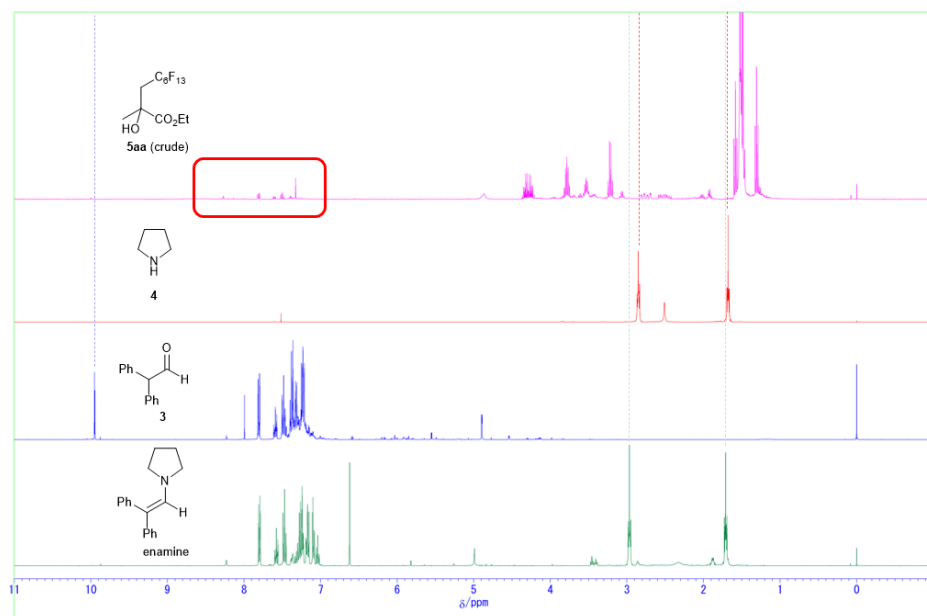

**Figure S11.** Crude  $^1\text{H}$  NMR compared with **3**, **4** and enamine.

Crude  $^1\text{H}$  NMR (top row) shows that aldehyde **3** remained after the reaction (the red circled part).

**6-6-2. Crude  $^1\text{H}$  NMR compared with DIPEA.**

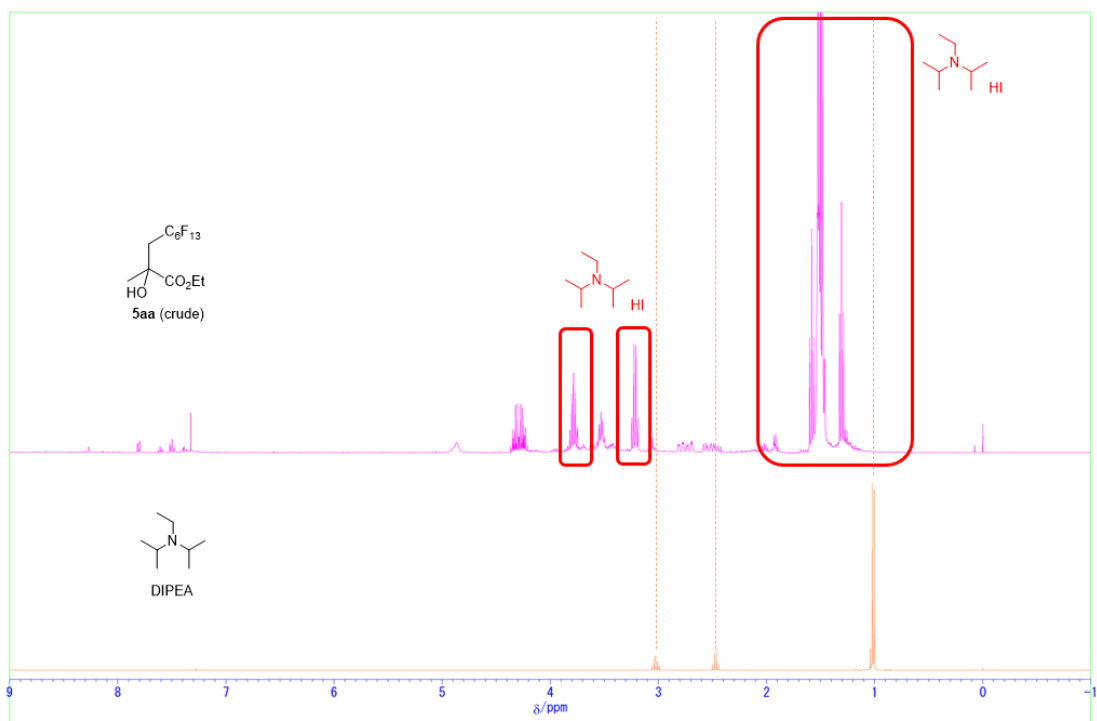

**Figure S12.** DIPEA after the reaction.

In Crude  $^1\text{H}$  NMR, remaining free DIPEA was not observed. A comparison with previous studies<sup>10</sup> suggests that the red circled peak is the DIPEA and HI salt.



## 7. Characterization of the products

### Ethyl 4,4,5,5,6,6,7,7,8,8,9,9,9-tridecafluoro-2-hydroxy-2-methylnonanoate (5aa)

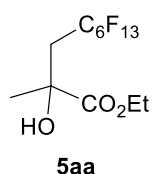

Yellow oil, 90.2 mg, yield: 80%. <sup>1</sup>H NMR (400 MHz, CDCl<sub>3</sub>) δ: 4.37–4.22 (2H, m), 3.50 (1H, s), 2.81–2.68 (1H, m), 2.58–2.44 (1H, m), 1.52 (3H, s), 1.31 (3H, t, *J* = 7.3 Hz). <sup>13</sup>C NMR (151 MHz, CDCl<sub>3</sub>) δ: 175.3, 120.4–106.6 (6C, m), 71.4 (d, *J* = 1.5 Hz), 62.8, 39.4 (t, *J* = 20.4 Hz), 28.0, 14.0. <sup>19</sup>F NMR (376 MHz, CDCl<sub>3</sub>) δ: -81.3 (3F, s), -110.3 (1F, d, *J* = 288.9 Hz), -114.7 (1F, d, *J* = 288.9 Hz), -122.2 (2F, s), -123.4 (2F, s), -124.5 (2F, s), -126.7 (2F, s). IR (neat, cm<sup>-1</sup>) 3389, 3061, 3028, 2922, 1780, 1279, 1236, 1186, 1142. HRMS (ESI<sup>+</sup>) calcd for C<sub>12</sub>H<sub>11</sub>F<sub>13</sub>O<sub>3</sub> [M+Na]<sup>+</sup>: 473.0393, found 473.0406.

### Methyl 4,4,5,5,6,6,7,7,8,8,9,9,9-tridecafluoro-2-hydroxy-2-methylnonanoate (5ba)

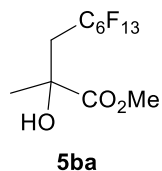

Yellow oil, 79.0 mg, yield: 73%. <sup>1</sup>H NMR (500 MHz, CDCl<sub>3</sub>) δ: 3.84 (3H, s), 3.46 (1H, s), 2.76–2.66 (1H, m), 2.57–2.46 (1H, m), 1.52 (3H, s). <sup>13</sup>C NMR (151 MHz, CDCl<sub>3</sub>) δ: 175.7, 118.2–108.9 (6C, m), 71.4 (d, *J* = 1.5 Hz), 53.6, 39.5 (t, *J* = 19.6 Hz), 27.9. <sup>19</sup>F NMR (471 MHz, CDCl<sub>3</sub>) δ: -81.3 (3F, s), -111.3 (1F, d, *J* = 277.9 Hz), -115.1 (1F, d, *J* = 277.9 Hz), -122.3 (2F, s), -123.4 (2F, s), -124.5 (2F, s), -126.7 (2F, s). IR (neat, cm<sup>-1</sup>) 3059, 2924, 2855, 1719, 1317, 1238, 1177. HRMS (DART<sup>+</sup>) calcd for C<sub>11</sub>H<sub>9</sub>F<sub>13</sub>O<sub>3</sub> [M+H]<sup>+</sup>: 437.0422, found 437.0442.

### tert-Butyl 4,4,5,5,6,6,7,7,8,8,9,9,9-tridecafluoro-2-hydroxy-2-methylnonanoate (5ca)

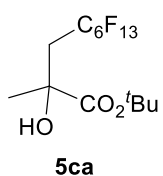

White solid, 95.9 mg, yield: 80%. <sup>1</sup>H NMR (500 MHz, CDCl<sub>3</sub>) δ: 3.53 (1H, s), 2.77–2.67 (1H, m), 2.51–2.41 (1H, m), 1.49 (9H, s), 1.46 (3H, s). <sup>13</sup>C NMR (151 MHz, CDCl<sub>3</sub>) δ: 174.4, 120.2–108.1 (6C, m), 83.7, 71.4 (d, *J* = 3.0 Hz), 39.3 (t, *J* = 19.6 Hz), 31.1, 28.2, 27.7 (2C). <sup>19</sup>F NMR (471 MHz, CDCl<sub>3</sub>) δ: -81.3 (3F, s), -109.3 (1F, d, *J* = 272.5 Hz), -114.5 (1F, d, *J* = 272.5 Hz), -122.3 (2F, s), -123.4 (2F, s), -124.7 (2F, s), -126.7 (2F, s). IR (neat, cm<sup>-1</sup>) 3482, 3092, 3063, 3036, 1653, 1279, 1233, 1188, 1142, 1121. HRMS (ESI<sup>+</sup>) calcd for C<sub>14</sub>H<sub>15</sub>F<sub>13</sub>O<sub>3</sub> [M+Na]<sup>+</sup>: 501.0706, found 501.0707.

### Benzyl 4,4,5,5,6,6,7,7,8,8,9,9,9-tridecafluoro-2-hydroxy-2-methylnonanoate (5da)

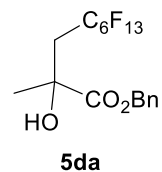

Yellow solid, 101.57 mg, yield: 79%. <sup>1</sup>H NMR (500 MHz, CDCl<sub>3</sub>) δ: 7.40–7.26 (5H, m), 5.23 (2H, dd, *J* = 16.0, 12.0 Hz), 3.46 (1H, s), 2.79–2.68 (1H, m), 2.56–2.48 (1H, m), 1.51 (3H, s). <sup>13</sup>C NMR (151 MHz, CDCl<sub>3</sub>) δ: 175.1, 134.6, 129.0, 128.8 (2C), 128.7, 119.5–108.3 (6C, m), 71.5 (d, *J* = 3.0 Hz), 68.7, 39.4 (t, *J* = 21.1 Hz), 28.0. <sup>19</sup>F-NMR (471 MHz, CDCl<sub>3</sub>) δ: -81.3 (3F, s), -110.8 (1F, d, *J* = 272.5 Hz), -114.8 (1F, d, *J* = 272.5 Hz), -122.3 (2F, s), -123.4 (2F, s), -124.4 (2F, s), -126.7 (2F, s). IR (neat, cm<sup>-1</sup>) 3503,

3094, 3036, 2982, 2893, 1742, 1233, 1184, 1142, 746, 696. HRMS (DART<sup>+</sup>) calcd for C<sub>17</sub>H<sub>13</sub>F<sub>13</sub>O<sub>3</sub> [M+H]<sup>+</sup>: 513.0735, found 513.0741.

Phenyl 4,4,5,5,6,6,7,7,8,8,9,9,9-tridecafluoro-2-hydroxy-2-methylnonanoate (5ea)

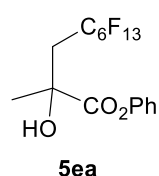

White solid, 85.9 mg, yield: 69%. <sup>1</sup>H NMR (400 MHz, CDCl<sub>3</sub>) δ: 7.45–7.40 (2H, m), 7.31–7.26 (1H, m), 7.08 (2H, d, *J* = 7.8 Hz), 3.47 (1H, s), 3.01–2.88 (1H, m), 2.73–2.59 (1H, m), 1.71 (3H, s). <sup>13</sup>C NMR (151 MHz, CDCl<sub>3</sub>) δ: 174.1, 150.3, 129.9 (2C), 126.8, 121.1, 120.3–108.2 (6C, m), 71.7 (d, *J* = 3.0 Hz), 39.6 (t, *J* = 20.4 Hz), 28.2. <sup>19</sup>F NMR (376 MHz, CDCl<sub>3</sub>) δ: -81.3 (3F, s), -110.3 (1F, d, *J* = 283.2 Hz), -113.9 (1F, d, *J* = 283.2 Hz), -122.2 (2F, s), -123.3 (2F, s), -124.4 (2F, s), -126.6 (2F, s). IR (neat, cm<sup>-1</sup>) 3466, 2580, 1762, 1366, 1237, 1189, 1144, 1121, 749, 700. HRMS (ESI<sup>+</sup>) calcd for C<sub>16</sub>H<sub>11</sub>F<sub>13</sub>O<sub>3</sub> [M+Na]<sup>+</sup>: 521.0393, found 521.0407.

Cyclohexyl 4,4,5,5,6,6,7,7,8,8,9,9,9-tridecafluoro-2-hydroxy-2-methylnonanoate (5fa)

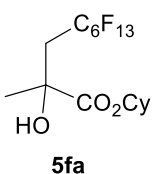

Yellow oil, 101.89 mg, yield: 81%. <sup>1</sup>H NMR (500 MHz, CDCl<sub>3</sub>) δ: 4.92 (1H, m), 3.52 (1H, s), 2.80–2.69 (1H, m), 2.55–2.44 (1H, m), 1.86 (2H, m), 1.73 (2H, m), 1.56 (2H, m), 1.51–1.35 (6H, m), 1.50 (3H, s). <sup>13</sup>C NMR (151 MHz, CDCl<sub>3</sub>) δ: 174.8, 119.5–107.6 (6C, m), 75.6, 71.4 (d, *J* = 3.0 Hz), 39.3 (t, *J* = 21.1 Hz), 31.5, 31.1, 28.2, 25.3, 23.7, 23.6. <sup>19</sup>F NMR (471 MHz, CDCl<sub>3</sub>) δ: -81.3 (3F, s), -110.3 (1F, d, *J* = 272.5 Hz), -114.7 (1F, d, *J* = 272.5 Hz), -122.3 (2F, s), -123.4 (2F, s), -124.5 (2F, s), -126.7 (2F, s). IR (neat, cm<sup>-1</sup>) 3509, 2942, 2864, 1732, 1451, 1235, 1180, 1144, 1123. HRMS (DART<sup>+</sup>) calcd for C<sub>16</sub>H<sub>17</sub>F<sub>13</sub>O<sub>3</sub> [M+H]<sup>+</sup>: 505.1048, found 505.1016.

Oxiran-2-ylmethyl 4,4,5,5,6,6,7,7,8,8,9,9,9-tridecafluoro-2-hydroxy-2-methylnonanoate (5ga)

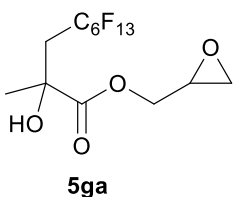

Yellow oil, 84.1 mg, yield: 70%. <sup>1</sup>H NMR (400 MHz, CDCl<sub>3</sub>) δ: 4.37–4.28 (1H, m), 3.92–3.86 (1H, m), 3.61 (1H, s), 3.41–3.23 (2H, m), 2.85–2.70 (1H, m), 2.64–2.48 (2H, m), 1.56 (3H, s). <sup>13</sup>C NMR (151 MHz, CDCl<sub>3</sub>) δ: 175.1 (d, *J* = 4.5 Hz), 119.4–106.4 (6C, m), 71.7, 68.9 (d, *J* = 1.5 Hz), 68.7, 39.5 (t, *J* = 19.6 Hz), 28.1 8.6 (d, *J* = 15.1 Hz). <sup>19</sup>F NMR (376 MHz, CDCl<sub>3</sub>) δ: 81.3 (3F, s), -110.7 (1F, d, *J* = 277.4 Hz), -114.4 (1F, d, *J* = 277.4 Hz), -122.2 (2F, s), -123.4 (2F, s), -124.4 (2F, s), -126.6 (2F, s). IR (neat, cm<sup>-1</sup>) 3415, 2958, 1743, 1317, 1232, 1187, 1139, 799, 707. HRMS (ESI<sup>+</sup>) calcd for C<sub>13</sub>H<sub>11</sub>F<sub>13</sub>O<sub>4</sub> [M+Na]<sup>+</sup>: 501.0342, found 501.0340.

2,2,2-Trifluoroethyl 4,4,5,5,6,6,7,7,8,8,9,9,9-tridecafluoro-2-hydroxy-2-methylnonanoate (5ha)

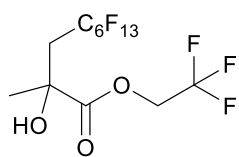

**5ha**

Yellow oil, 83.7 mg, yield: 68%.  $^1\text{H}$  NMR (400 MHz,  $\text{CDCl}_3$ )  $\delta$ : 4.67–4.51 (2H, m), 3.30 (1H, s), 2.86–2.72 (1H, m), 2.64–2.50 (1H, m), 1.58 (3H, s).  $^{13}\text{C}$  NMR (151 MHz,  $\text{CDCl}_3$ )  $\delta$ : 173.9, 128.5–108.3, (7C, m), 71.7 (d,  $J = 3.0$  Hz), 61.9 (dd,  $J = 74.7, 37.0$  Hz), 39.5 (t,  $J = 20.4$  Hz), 27.9.  $^{19}\text{F}$  NMR (376 MHz,  $\text{CDCl}_3$ )  $\delta$ : -74.5 (3F, s), -81.3 (3F, s), -110.5 (1F, d,  $J = 266.96$  Hz), -114.6 (1F, d,  $J = 266.96$  Hz), -122.3 (2F, s), -123.4 (2F, s), -124.5 (2F, s), -126.6 (2F, s). IR (neat,  $\text{cm}^{-1}$ ) 3519, 2987, 1763, 1364, 1287, 1235, 1136, 814, 700, 654. HRMS ( $\text{ESI}^+$ ) calcd for  $\text{C}_{12}\text{H}_8\text{F}_{16}\text{O}_3$   $[\text{M}+\text{Na}]^+$ : 527.0110, found 527.0126.

(1R,2R,4R)-1,7,7-trimethyl-2-bicyclo[2.2.1]heptanyl 4,4,5,5,6,6,7,7,8,8,9,9,9-tridecafluoro-2-hydroxy-2-methylnonanoate (5ia)

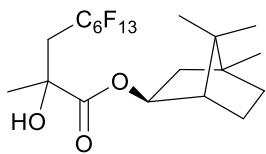

**5ia**

(52: 48 diastereomer mixture, dr was measured by HPLC.) Yellow oil, 98.5 mg, yield: 71%.  $^1\text{H}$  NMR (400 MHz,  $\text{CDCl}_3$ )  $\delta$ : 4.80 (minor, 1H, dd,  $J = 6.9, 2.7$  Hz), 4.64 (major, 1H, dd,  $J = 7.8, 3.2$  Hz), 3.56 (minor, 1H, s), 3.53 (major, 1H, s), 2.73–2.60 (major and minor, 1H, m), 2.57–2.43 (major and minor, 1H, m), 1.92 (major, 1H, dd,  $J = 13.7, 7.8$  Hz), 1.85–1.79 (minor, 1H, m), 1.85–1.68 (major and minor, 3H, m), 1.63–1.56 (major and minor, 1H, m), 1.49 (major and minor, 3H, d,  $J = 6.4$  Hz), 1.23–1.08 (major and minor, 2H, m), 0.96 (major and minor, 3H, s), 0.87 (major and minor, 3H, s), 0.86 (major and minor, 3H, s).  $^{13}\text{C}$  NMR (151 MHz,  $\text{CDCl}_3$ )  $\delta$ : 174.9 (minor), 174.8 (major), 129.0–106.6 (major and minor, 6C, m), 84.5 (major), 83.9 (minor), 71.4 (major, d,  $J = 1.5$  Hz), 71.2 (minor, d,  $J = 1.5$  Hz), 49.2 (major), 48.7 (minor), 47.2 (major), 47.1 (minor), 45.1 (major), 45.0 (minor), 39.2 (major and minor, m), 38.0 (major and minor), 33.9 (major), 33.7 (minor), 28.2 (minor), 27.9 (major), 27.0 (major and minor), 20.1 (major and minor), 19.9 (major), 19.7 (minor), 11.5 (major), 11.3 (minor).  $^{19}\text{F}$  NMR (376 MHz,  $\text{CDCl}_3$ )  $\delta$ : -81.4 (3F, s), -110.9 (1F, dd,  $J = 267.1, 67.7$  Hz), -114.6 (1F, dd,  $J = 312.2, 45.1$  Hz), -122.4 (2F, s), -123.5 (2F, s), -124.3 (2F, d,  $J = 69.4$  Hz), -126.8 (2F, s). IR (neat,  $\text{cm}^{-1}$ ) 3518, 2958, 1736, 1458, 1232, 1144, 814, 773, 732, 700. HRMS ( $\text{ESI}^+$ ) calcd for  $\text{C}_{20}\text{H}_{23}\text{F}_{13}\text{O}_3$   $[\text{M}+\text{Na}]^+$ : 581.1332, found 581.1350. HPLC: GL Science Inc. Inertsil<sup>®</sup> Diol column; detected at 294 nm; hexanes/ethanol, 95/5; flow = 1.0 mL/min; retention times: 5.50 min, 7.04 min.

(1*R*,2*S*,5*R*)-5-Methyl-2-(1-methylethyl)cyclohexyl 4,4,5,5,6,6,7,7,8,8,9,9,9-tridecafluoro-2-hydroxy-2-methylnonanoate (5ja)

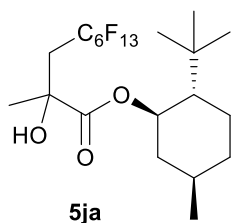

(54: 46 diastereomer mixture, dr was measured by HPLC.)

Yellow oil, 115.9 mg, yield: 82%. <sup>1</sup>H NMR (400 MHz, CDCl<sub>3</sub>) δ: 4.83–4.73 (major and minor, 1H, m), 3.55 (major, 1H, s), 3.54 (minor, 1H, s), 2.82–2.70 (major and minor, 1H, m), 2.56–2.42 (major and minor, 1H, m), 2.04–1.98 (major and minor, 1H, m), 1.90–1.79 (major and minor, 1H, m), 1.71 (major and minor, 2H, d, *J* = 11.9 Hz), 1.55–1.40 (major and minor, 5H, m), 1.12–0.96 (major and minor, 2H, m), 0.94–0.83 (major and minor, 7H, m), 0.74 (major and minor, 3H, dd, *J* = 15.1, 7.1 Hz). <sup>13</sup>C NMR (151 MHz, CDCl<sub>3</sub>) δ: 175.0 (major and minor), 119.5–108.7 (major and minor, 6C, m), 77.5 (major and minor), 71.5 (minor, m), 71.4 (major, m), 47.1 (minor), 47.0 (major), 40.4 (major), 40.0 (minor), 39.3 (major, t, *J* = 20.4 Hz), 38.7 (minor, t, *J* = 20.4 Hz), 34.2 (major and minor), 31.5 (major and minor), 28.4 (major), 28.2 (minor), 26.2 (major), 25.6 (minor), 23.1 (minor), 22.8 (major), 22.1 (major), 22.0 (minor), 21.0 (minor), 20.9 (major), 15.8 (major), 15.4 (minor). <sup>19</sup>F NMR (376 MHz, CDCl<sub>3</sub>) δ: -81.3 (3F, s), -109.7 (1F, dd, *J* = 278.4, 184.3 Hz), -114.6 (1F, t, *J* = 289.6 Hz), -122.3 (2F, d, *J* = 34.7 Hz), -123.4 (2F, s), -124.4 (2F, d, *J* = 57.8 Hz), -126.7 (2F, s). IR (neat, cm<sup>-1</sup>) 3453, 2960, 1748, 1458, 1232, 1187, 1144, 1009, 814, 748, 699. HRMS (ESI<sup>+</sup>) calcd for C<sub>20</sub>H<sub>25</sub>F<sub>13</sub>O<sub>3</sub> [M+Na]<sup>+</sup>: 583.1488, found 583.1501. HPLC: GL Science Inc. Inertsil<sup>®</sup> Diol column; detected at 294 nm; hexane/ethanol, 95/5; flow = 1.0 mL/min; retention times: 3.09 min, 3.86 min.

(1*R*,2*S*,5*R*)-5-Methyl-2-(1-methy-1-phenylethyl)cyclohexyl 4,4,5,5,6,6,7,7,8,8,9,9,9-tridecafluoro-2-hydroxy-2-methylnonanoate (5ka)

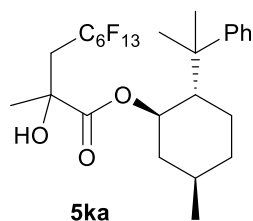

(74: 26 diastereomer mixture, dr was measured by HPLC.)

Yellow oil, 111.9 mg, yield: 70%. <sup>1</sup>H NMR (400 MHz, CDCl<sub>3</sub>) δ: 7.37–7.28 (major and minor, 4H, m), 7.22–7.16 (major and minor, 1H, m), 4.90–4.79 (major and minor, 1H, m), 2.54–2.38 (major and minor, 1H, m), 2.30–2.14 (major and minor, 2H, m), 2.04–1.95 (major and minor, 1H, m), 1.83–1.79 (major and minor, 1H, m), 1.73–1.66 (major and minor, 1H, m), 1.55–1.47 (major and minor, 1H, m), 1.34 (major and minor, 3H, s), 1.27 (major and minor, 3H, s), 1.22–1.17 (major and minor, 5H, m), 1.16–0.99 (major and minor, 2H, m), 0.96–0.86 (major and minor, 3H, m). <sup>13</sup>C NMR (151 MHz, CDCl<sub>3</sub>) δ: 174.4 (minor), 173.1 (major), 152.2 (major), 151.6 (minor), 128.5 (major, 2C), 128.4 (minor, 2C), 125.7 (major), 125.6 (minor), 125.4 (minor), 125.3 (major), 121.9–106.8 (major and minor, 6C, m), 78.5 (minor), 78.0 (major), 72.3 (major), 71.8 (minor), 49.5 (major), 49.4 (minor), 40.7 (minor), 40.5 (major), 39.7 (minor), 39.6 (major), 39.0 (major, t, *J* = 19.6 Hz), 38.5 (minor, t, *J* = 19.6 Hz), 34.6 (major and minor), 31.4 (major and minor), 29.5 (major), 28.7 (minor), 27.3 (major and minor), 26.9 (minor), 26.7 (major), 25.3 (minor), 24.0 (major), 21.8 (major and minor).

$^{19}\text{F}$  NMR (376 MHz,  $\text{CDCl}_3$ )  $\delta$ : -81.3 (3F, s), -108.0–114.4 (2F, m), -122.3 (2F, s), -123.4 (2F, s), -124.3 (2F, d,  $J = 57.8$  Hz), -126.7 (2F, s). IR (neat,  $\text{cm}^{-1}$ ) 3564, 2958, 1729, 1459, 1364, 1235, 1187, 1144, 732, 700. HRMS (ESI $^+$ ) calcd for  $\text{C}_{26}\text{H}_{29}\text{F}_{13}\text{O}_3$   $[\text{M}+\text{Na}]^+$ : 659.1801, found 659.1801. HPLC: DAICEL. Chiralpak OH column; detected at 294 nm; hexane/IPA, 90/10; flow = 0.25 mL/min; retention times: 18.09 min, 19.06 min.

4,4,5,5,6,6,7,7,8,8,9,9,9-Tridecafluoro-2-hydroxy-2-methyl-1-(10,10-dimethyl-3,3-dioxo-3 $\lambda^6$ -thia-4-azatricyclo[5.2.1.0 $^{1,5}$ ]decan-4-yl)nonane-1-one (51a)

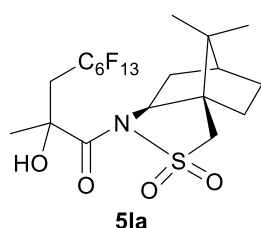

(95: 5 diastereomer mixture, dr was measured by HPLC.)

Yellow oil, 37.1 mg, yield: 24%.  $^1\text{H}$  NMR (500 MHz,  $\text{CDCl}_3$ , major)  $\delta$ : 4.04 (1H, dd,  $J = 7.7, 4.6$  Hz), 3.75 (1H, s), 3.58 (1H, d,  $J = 13.5$  Hz), 3.47 (1H, d,  $J = 13.5$  Hz), 3.09–3.04 (1H, m), 2.46–2.42 (1H, m), 2.04–1.87 (5H, m), 1.63 (3H, s), 1.46–1.41 (1H, m), 1.36–1.34 (1H, m), 1.18 (3H, s), 0.99 (3H, s).  $^{13}\text{C}$  NMR (151 MHz,  $\text{CDCl}_3$ , major)  $\delta$ : 175.8, 143.2–97.9 (6C, m),

75.7, 67.7, 53.9, 48.7, 47.9, 44.9, 41.2 (t,  $J = 19.6$  Hz), 38.2, 33.4, 26.9, 26.5, 21.0, 20.1.  $^{19}\text{F}$  NMR (471 MHz,  $\text{CDCl}_3$ , major)  $\delta$ : -81.0 (3F, s), -107.7 (1F, d,  $J = 289.0$  Hz), -102.5 (1F, d,  $J = 289.0$  Hz), -121.9 (2F, s), -123.1 (2F, s), -124.1 (2F, s), -126.4 (2F, s). IR (neat,  $\text{cm}^{-1}$ ) 3495, 2984, 2976, 2959, 2889, 1699, 1314, 1236, 1173, 1159, 1142, 1123.  $[\alpha]_D^{21}$  -22.3 (c 1,  $\text{CHCl}_3$ ). HRMS (DART $^+$ ) calcd for  $\text{C}_{20}\text{H}_{22}\text{F}_{13}\text{NO}_4\text{S}$   $[\text{M}+\text{H}]^+$ : 620.1140, found 620.1134. HPLC: GL Science Inc. Inertsil $^{\text{B}}$  Diol column; detected at 294 nm; hexane/ethanol, 95/5; flow = 1.0 mL/min; retention times: 6.40 min, 6.92 min.

4,4,5,5,6,6,7,7,8,8,9,9,9-Tridecafluoro-2-hydroxy-*N,N*,2-trimethylnonanamide (5ma)

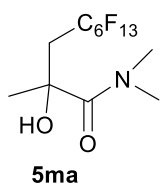

Yellow oil, 21.0 mg, yield: 18%.  $^1\text{H}$  NMR (500 MHz,  $\text{CDCl}_3$ )  $\delta$ : 4.84 (1H, s), 3.11 (6H, s), 2.76–2.59 (2H, m), 1.61 (3H, s).  $^{13}\text{C}$  NMR (151 MHz,  $\text{CDCl}_3$ )  $\delta$ : 173.5, 132.6–108.5 (6C, m), 71.4, 39.7 (t,  $J = 21.1$  Hz), 38.6, 27.2 (2C).  $^{19}\text{F}$  NMR (471 MHz,  $\text{CDCl}_3$ )  $\delta$ : -81.3 (3F, s), -112.3 (1F, d,  $J = 267.0$  Hz), -114.3 (1F, d,  $J = 267.0$  Hz), -122.2 (2F, s), -123.3 (2F, s), -124.2 (2F, s), -126.6 (2F, s). IR (neat,  $\text{cm}^{-1}$ ) 3268, 2982,

2955, 2934, 1616, 1233, 1184, 1165, 1140, 1123. HRMS (DART $^+$ ) calcd for  $\text{C}_{12}\text{H}_{12}\text{F}_{13}\text{NO}_2$   $[\text{M}+\text{H}]^+$ : 450.0739, found 450.0699.

4,4,5,5,6,6,7,7,8,8,9,9,9-Tridecafluoro-2-hydroxy-*N,N*-dimethylnonanamide (5na)

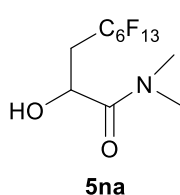

Yellow oil, 20.6 mg, yield: 20%.  $^1\text{H}$  NMR (400 MHz,  $\text{CDCl}_3$ )  $\delta$ : 4.85–4.80 (1H, m), 3.90 (1H, d,  $J = 7.8$  Hz), 3.05 (3H, s), 3.02 (3H, s), 2.43–2.29 (2H, m).  $^{13}\text{C}$  NMR (151 MHz,  $\text{CDCl}_3$ )  $\delta$ : 172.2, 119.6–105.8 (6C, m), 61.9, 36.8 (t,  $J = 23.4$  Hz), 36.4 (2C).  $^{19}\text{F}$  NMR (376 MHz,  $\text{CDCl}_3$ )  $\delta$ : -81.3 (3F, s), -113.5 (1F, d,  $J = 277.4$  Hz), -114.4 (1F, d,  $J = 277.4$  Hz), -122.3 (2F, s), -123.4 (2F, s), -124.0 (2F, s), -

126.6 (2F, s). IR (neat,  $\text{cm}^{-1}$ ) 3347, 1634, 1228, 1185, 1141, 1121, 1086, 716, 656. HRMS (ESI<sup>+</sup>) calcd for  $\text{C}_{11}\text{H}_{10}\text{NO}_2$   $[\text{M}+\text{Na}]^+$ : 458.0396, found 458.0414.

Methyl 4,4,5,5,6,6,7,7,8,8,9,9,9-tridecafluoro-2-hydroxynonanoate (5oa)

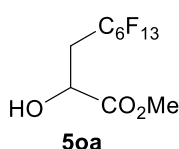

Yellow oil, 17.9 mg, yield: 17%. <sup>1</sup>H NMR (400 MHz,  $\text{CDCl}_3$ )  $\delta$ : 4.62–4.58 (1H, m), 3.87 (3H, s), 3.02 (1H, d,  $J = 5.0$  Hz), 2.76–2.62 (1H, m), 2.54–2.39 (1H, m). <sup>13</sup>C NMR (151 MHz,  $\text{CDCl}_3$ )  $\delta$ : 173.5, 119.3–110.3 (6C, m), 64.9, 53.5, 35.4 (t,  $J = 21.1$  Hz). <sup>19</sup>F NMR (376 MHz,  $\text{CDCl}_3$ )  $\delta$ : -81.3 (3F, s), -113.2 (1F, d,  $J = 277.4$  Hz), -114.2 (1F, d,  $J = 277.4$  Hz), -121.3 (2F, s), -123.4 (2F, s), -124.1 (2F, s), -126.6 (2F, s). IR (neat,  $\text{cm}^{-1}$ ) 3459, 2963, 1748, 1565, 1442, 1230, 1191, 1142, 815, 705. HRMS (ESI<sup>+</sup>) calcd for  $\text{C}_{10}\text{H}_7\text{F}_{13}\text{O}_3$   $[\text{M}+\text{Na}]^+$ : 445.0080, found 445.0078.

Ethyl 4,4,5,5,6,6,7,7,8,8,9,9,9-tridecafluoro-2-hydroxynonanoate (5pa)

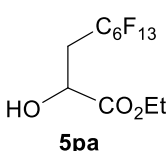

Yellow oil, 25.2 mg, yield: 23%. <sup>1</sup>H NMR (400 MHz,  $\text{CDCl}_3$ )  $\delta$ : 4.59–4.56 (1H, m), 4.32 (2H, dd,  $J = 14.4, 7.6$  Hz), 3.06 (1H, d,  $J = 5.0$  Hz), 2.75–2.61 (1H, m), 2.54–2.39 (1H, m), 1.33 (3H, t,  $J = 7.1$  Hz). <sup>13</sup>C NMR (151 MHz,  $\text{CDCl}_3$ )  $\delta$ : 170.5, 122.1–106.8 (6C, m), 65.0, 63.0, 35.3 (t,  $J = 20.4$  Hz), 14.2. <sup>19</sup>F NMR (376 MHz,  $\text{CDCl}_3$ )  $\delta$ : -81.3 (3F, s), -113.5 (2F, t,  $J = 294.8$  Hz), -122.3 (2F, s), -123.4 (2F, s), -124.1 (2F, s), -126.6 (2F, s). IR (neat,  $\text{cm}^{-1}$ ) 3461, 2989, 1743, 1565, 1531, 1231, 1122, 779, 707. HRMS (ESI<sup>+</sup>) calcd for  $\text{C}_{11}\text{H}_{19}\text{F}_{13}\text{O}_3$   $[\text{M}+\text{Na}]^+$ : 459.0236, found 459.0236.

tert-Butyl 4,4,5,5,6,6,7,7,8,8,9,9,9-tridecafluoro-2-hydroxynonanoate (5qa)

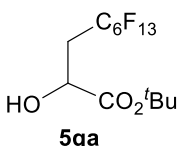

Yellow oil, 37.3 mg, yield: 32%. <sup>1</sup>H NMR (400 MHz,  $\text{CDCl}_3$ )  $\delta$ : 4.45–4.41 (1H, m), 3.11 (1H, d,  $J = 4.6$  Hz), 2.69–2.55 (1H, m), 2.51–2.36 (1H, m), 1.51 (9H, s). <sup>13</sup>C NMR (151 MHz,  $\text{CDCl}_3$ )  $\delta$ : 172.2, 119.5–108.5 (6C, m), 84.2, 65.3, 35.3 (t,  $J = 21.1$  Hz), 28.0 (3C). <sup>19</sup>F NMR (376 MHz,  $\text{CDCl}_3$ )  $\delta$ : -81.1 (3F, s), -112.9 (2F, s), -122.2 (2F, s), -123.3 (2F, s), -124.0 (2F, s), -126.5 (2F, s). IR (neat,  $\text{cm}^{-1}$ ) 3433, 2981, 1727, 1166, 1139, 1086, 829, 752, 703. HRMS (ESI<sup>+</sup>) calcd for  $\text{C}_{13}\text{H}_{13}\text{F}_{13}\text{O}_3$   $[\text{M}+\text{Na}]^+$ : 487.0549, found 487.0549.

Benzyl 4,4,5,5,6,6,7,7,8,8,9,9,9-tridecafluoro-2-hydroxynonanoate (5ra)

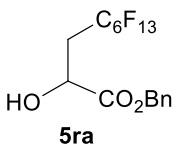

Yellow oil, 21.9 mg, yield: 18%. <sup>1</sup>H NMR (400 MHz,  $\text{CDCl}_3$ )  $\delta$ : 7.42–7.34 (5H, m), 5.26 (2H, dd,  $J = 17.9, 12.4$  Hz), 4.63–4.59 (1H, m), 3.03 (1H, d,  $J = 5.0$  Hz), 2.75–2.61 (1H, m), 2.54–2.39 (1H, m). <sup>13</sup>C NMR (151 MHz,  $\text{CDCl}_3$ )  $\delta$ : 172.9, 134.5, 129.1, 128.9 (2C), 128.8, 119.3–108.4 (6C, m), 68.6, 65.1, 35.2 (t,  $J = 21.1$  Hz). <sup>19</sup>F NMR (376 MHz,  $\text{CDCl}_3$ )  $\delta$ : -81.3 (3F, s), -113.4 (2F, t,  $J = 295.2$  Hz), -122.3 (2F, s), -123.4 (2F, s), -124.1 (2F, s), -126.7 (2F, s). IR (neat,  $\text{cm}^{-1}$ ) 3464, 2969, 1743, 1529, 1232, 1142, 812, 732,

697. HRMS (ESI<sup>+</sup>) calcd for C<sub>16</sub>H<sub>11</sub>F<sub>13</sub>O<sub>3</sub> [M+Na]<sup>+</sup>: 521.0393, found 521.0392.

Ethyl 4,4,5,5,6,6,7,7,8,8,9,9,9-tridecafluoro-2-hydroxy-2-phenylethylnonanoate (5sa)

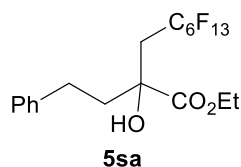

Yellow oil, 89.4 mg, yield: 66%. <sup>1</sup>H NMR (500 MHz, CDCl<sub>3</sub>) δ: 7.30–7.15 (5H, m), 4.30 (1H, dq, *J* = 10.9, 7.2 Hz), 4.22 (1H, dq, *J* = 10.9, 7.2 Hz), 3.62 (1H, s), 2.83–2.80 (1H, m), 2.79–2.66 (1H, m), 2.58–2.52 (1H, m), 2.43 (1H, m), 2.06 (2H, dt, *J* = 11.5, 5.2 Hz), 1.31 (3H, t, *J* = 7.2 Hz). <sup>13</sup>C NMR (151 MHz, CDCl<sub>3</sub>) δ: 174.5, 140.8, 128.7, 128.5 (2C), 126.3, 120.2–110.5 (6C, m), 73.7, 63.0, 42.2, 39.0 (t, *J* = 21.1 Hz), 29.3, 14.1. <sup>19</sup>F NMR (471 MHz, CDCl<sub>3</sub>) δ: -81.3 (3F, s), -110.5 (1F, d, *J* = 279.3 Hz), -114.1 (1F, d, *J* = 279.3 Hz), -122.3 (2F, s), -123.4 (2F, s), -124.5 (2F, s), -126.7 (2F, s). IR (neat, cm<sup>-1</sup>) 3528, 3067, 2996, 2951, 1732, 1362, 1229, 1184, 1138, 1121, 745, 696. HRMS (DART<sup>+</sup>) calcd for C<sub>19</sub>H<sub>17</sub>F<sub>13</sub>O<sub>3</sub> [M+H]<sup>+</sup>: 541.1048, found 541.1083.

Dimethyl 2-hydroxy-2-(2,2,3,3,4,4,5,5,6,6,7,7,7-tridecafluorohexyl)-butanedioate (5ta)

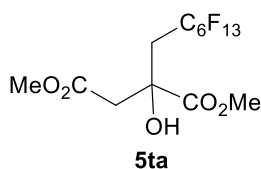

Yellow oil, 44.3 mg, yield: 36%. <sup>1</sup>H NMR (400 MHz, CDCl<sub>3</sub>) δ: 4.01 (1H, s), 3.87 (1H, s), 3.72 (1H, s), 2.90 (2H, dd, *J* = 60.2, 15.8 Hz), 2.72–2.55 (2H, m). <sup>13</sup>C NMR (151 MHz, CDCl<sub>3</sub>) δ: 173.5, 170.2, 122.5–106.6 (6C, m), 72.3, 53.8, 52.4, 43.8, 38.6 (t, *J* = 34.7 Hz). <sup>19</sup>F NMR (376 MHz, CDCl<sub>3</sub>) δ: -81.3 (3F, s), -112.0 (1F, d, *J* = 265.9 Hz), -113.8 (1F, d, *J* = 265.9 Hz), -122.2 (2F, s), -123.4 (2F, s), -124.2 (2F, s), -126.6 (2F, s). IR (neat, cm<sup>-1</sup>) 3532, 1732, 1568, 1364, 1270, 1182, 1159, 1138, 694, 660. HRMS (ESI<sup>+</sup>) calcd for C<sub>13</sub>H<sub>11</sub>F<sub>13</sub>O<sub>5</sub> [M+Na]<sup>+</sup>: 517.0291, found 517.0306.

Diethyl 2-hydroxy-2-(2,2,3,3,4,4,5,5,6,6,7,7,7-tridecafluorohexyl)-butanedioate (5ua)

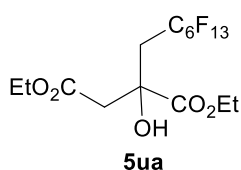

Yellow oil, 50.6 mg, yield: 39%. <sup>1</sup>H NMR (400 MHz, CDCl<sub>3</sub>) δ: 4.37–4.26 (2H, m), 4.17 (2H, dd, *J* = 7.0, 3.5 Hz), 4.05 (1H, s), 2.87 (2H, dd, *J* = 63.0, 15.8 Hz), 2.69–2.58 (2H, m), 1.32 (3H, t, *J* = 7.1 Hz), 1.26 (3H, t, *J* = 7.1 Hz). <sup>13</sup>C NMR (151 MHz, CDCl<sub>3</sub>) δ: 173.0, 169.7, 120.6–105.9 (6C, m), 72.3, 63.1, 61.4, 44.0, 38.6 (t, *J* = 20.2 Hz), 14.2, 14.0. <sup>19</sup>F NMR (376 MHz, CDCl<sub>3</sub>) δ: -81.3 (3F, s), -111.5 (1F, d, *J* = 277.4 Hz), -113.5 (1F, d, *J* = 277.4 Hz), -122.2 (2F, s), -123.4 (2F, s), -124.2 (2F, s), -126.6 (2F, s). IR (neat, cm<sup>-1</sup>) 3498, 2989, 1743, 1231, 1189, 1122, 814, 745, 697. HRMS (ESI<sup>+</sup>) calcd for C<sub>15</sub>H<sub>15</sub>F<sub>13</sub>O<sub>5</sub> [M+H]<sup>+</sup>: 523.0785, found 523.0784.

Ethyl 4,4,5,5,6,6,7,7,8,8,9,9,10,10,10-pentadecafluoro-2-hydroxy-2-methyldecanoate (5ab)

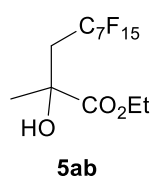

Yellow oil, 100.29 mg, yield: 80%. <sup>1</sup>H NMR (400 MHz, CDCl<sub>3</sub>) δ: 4.37–4.22 (2H, m), 3.49 (1H, s), 2.81–2.68 (1H, m), 2.57–2.44 (1H, m), 1.51 (3H, s), 1.31 (3H, t, *J* = 7.1 Hz). <sup>13</sup>C NMR (151 MHz, CDCl<sub>3</sub>) δ 175.3, 120.2–106.6 (7C, m), 71.4 (d, *J* = 1.5 Hz), 62.9, 39.4 (t, *J* = 20.4 Hz), 28.0, 14.0. <sup>19</sup>F NMR (376 MHz, CDCl<sub>3</sub>) δ: -81.3 (3F, s), -110.3 (1F, d, *J* = 283.2 Hz), -114.7 (1F, d, *J* = 283.2 Hz), -122.1 (2F, s), -122.6 (2F, s), -123.2 (2F, s), -124.5 (2F, s), -126.7 (2F, s). IR (neat, cm<sup>-1</sup>) 3511, 2990, 1739, 1452, 1237, 1141, 1014, 721, 702. HRMS (ESI<sup>+</sup>) calcd for C<sub>13</sub>H<sub>11</sub>F<sub>15</sub>O<sub>3</sub> [M+Na]<sup>+</sup>: 523.0361, found 523.0372.

Ethyl 4,4,5,5,6,6,7,7,8,8,9,9,10,10,11,11,11-heptadecafluoro-2-hydroxy-2-methylundecanoate (5ac)

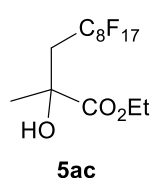

Yellow solid, 103.0 mg, yield: 76%. <sup>1</sup>H NMR (400 MHz, CDCl<sub>3</sub>) δ: 4.37–4.21 (2H, m), 3.50 (1H, s), 2.80–2.68 (1H, m), 2.57–2.44 (1H, m), 1.52 (3H, s), 1.31 (3H, t, *J* = 7.3 Hz). <sup>13</sup>C NMR (151 MHz, CDCl<sub>3</sub>) δ 175.3, 120.4–106.4 (8C, m), 71.4 (d, *J* = 1.5 Hz), 62.9, 39.4 (t, *J* = 19.6 Hz), 28.0, 14.0. <sup>19</sup>F NMR (376 MHz, CDCl<sub>3</sub>) δ: -81.2 (3F, s), -110.3 (1F, d, *J* = 283.2 Hz), -114.6 (1F, d, *J* = 283.2 Hz), -122.0 (2F, s), -122.4 (4F, s), -123.2 (2F, s), -124.5 (2F, s), -126.6 (2F, s). IR (neat, cm<sup>-1</sup>) 3504, 1725, 1370, 1326, 1198, 1144, 885, 703, 660. HRMS (ESI<sup>+</sup>) calcd for C<sub>14</sub>H<sub>11</sub>F<sub>17</sub>O<sub>3</sub> [M+Na]<sup>+</sup>: 573.0329, found 573.0333.

Ethyl 4,4,5,5,6,6,7,7,8,8,9,9,10,10,11,11,12,12,13,13,13-henicosafluoro-2-hydroxy-2-methyltridecanoate (5ad)

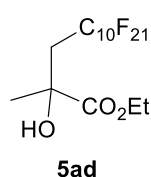

White solid, 122.6 mg, yield: 76%. <sup>1</sup>H NMR (400 MHz, CDCl<sub>3</sub>) δ: 4.37–4.21 (2H, m), 3.51 (1H, s), 2.80–2.68 (1H, m), 2.57–2.44 (1H, m), 1.51 (3H, s), 1.31 (3H, t, *J* = 7.1 Hz). <sup>13</sup>C NMR (151 MHz, CDCl<sub>3</sub>) δ 175.3, 120.3–106.5 (10C, m), 71.4 (d, *J* = 1.5 Hz), 62.9, 39.4 (t, *J* = 19.6 Hz), 28.0, 14.0. <sup>19</sup>F NMR (376 MHz, CDCl<sub>3</sub>) δ: -81.2 (3F, s), -110.2 (1F, d, *J* = 277.4 Hz), -114.6 (1F, d, *J* = 277.4 Hz), -122.0 (2F, s), -122.3 (8F, s), -123.2 (2F, s), -124.5 (2F, s), -126.6 (2F, s). IR (neat, cm<sup>-1</sup>) 3505, 1726, 1343, 1214, 1184, 1149, 875, 799, 666. HRMS (ESI<sup>+</sup>) calcd for C<sub>16</sub>H<sub>11</sub>F<sub>21</sub>O<sub>3</sub> [M+Na]<sup>+</sup>: 673.0265, found 673.0264.

Ethyl 4,4-difluoro-4-(2,3,4,5,6-pentafluorophenyl)-2-hydroxy-2-methylbutanoate (5ae)

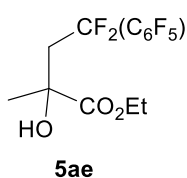

Yellow oil, 61.5 mg, yield: 71%. <sup>1</sup>H NMR (400 MHz, CDCl<sub>3</sub>) δ: 4.35–4.23 (2H, m), 3.32 (1H, d, *J* = 0.9 Hz), 2.94–2.84 (1H, m), 2.80–2.68 (1H, m), 1.44 (3H, s), 1.34 (3H, t, *J* = 7.1 Hz). <sup>13</sup>C NMR (151 MHz, CDCl<sub>3</sub>) δ 175.7, 145.4–117.9 (7C, m), 71.5 (dd, *J* = 7.6, 1.5 Hz), 62.9, 46.4 (t, *J* = 25.7 Hz), 28.0, 14.1. <sup>19</sup>F NMR (376 MHz, CDCl<sub>3</sub>) δ: -81.9 (1F, d, *J* = 260.7 Hz), -92.9 (1F, dd, *J* = 268.0, 36.7 Hz), -140.7–140.9 (2F, m), -151.7 (1F, d, *J* = 23.1 Hz), -161.7 (2F, t, *J* = 23.1 Hz). IR (neat, cm<sup>-1</sup>) 3497, 2942, 1732, 1656, 1528, 1336, 1178, 1047, 990, 852, 684. HRMS (ESI<sup>+</sup>) calcd for C<sub>13</sub>H<sub>11</sub>F<sub>7</sub>O<sub>3</sub>



[M+Ma]<sup>+</sup>: 371.0489, found 371.0489.

Benzyl 4,4,4-trifluoro-2-hydroxy-2-methylbutanoate (5df)

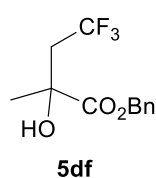

Colorless oil, 50.0 mg, yield: 76%. <sup>1</sup>H NMR (400 MHz, CDCl<sub>3</sub>) δ: 7.42–7.34 (5H, m), 5.23 (2H, dd, *J* = 29.8, 11.9 Hz), 3.43 (1H, s), 2.76–2.65 (m), 2.61–2.50 (1H, m), 1.49 (3H, s). <sup>13</sup>C NMR (151 MHz, CDCl<sub>3</sub>) δ 175.0, 134.7, 128.9 (2C), 128.6 (2C), 128.0–122.5 (1C, m), 71.3 (d, *J* = 3.0 Hz), 68.6, 43.0 (dd, *J* = 55.9, 27.9 Hz), 27.2. <sup>19</sup>F NMR (376 MHz, CDCl<sub>3</sub>) δ: -62.1 (3F, s). IR (neat, cm<sup>-1</sup>) 3511, 2987, 1739, 1369, 1268, 1182, 1144, 1075, 966, 911, 750. HRMS (ESI<sup>+</sup>) calcd for C<sub>12</sub>H<sub>13</sub>F<sub>3</sub>O<sub>3</sub> [M+Na]<sup>+</sup>: 285.0709, found 285.0708.

Benzyl 4,4,5,5,5-pentafluoro-2-hydroxy-2-methylpentanoate (5dg)

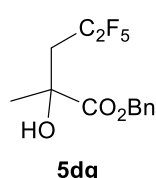

Yellow oil, 56.0 mg, yield: 72%. <sup>1</sup>H NMR (400 MHz, CDCl<sub>3</sub>) δ: 7.41–7.33 (5H, m), 5.22 (2H, dd, *J* = 11.6, 5.8 Hz), 3.47 (1H, s), 2.74–2.61 (1H, m), 2.54–2.41 (1H, m), 1.51 (3H, s). <sup>13</sup>C NMR (151 MHz, CDCl<sub>3</sub>) δ 175.1, 134.7, 129.0, 128.9, 128.7 (2C), 121.6–113.1 (2C, m), 71.4 (d, *J* = 1.5 Hz), 68.7, 39.3 (t, *J* = 19.6 Hz), 27.8. <sup>19</sup>F NMR (376 MHz, CDCl<sub>3</sub>) δ: -86.9 (3F, s), -115.2 (1F, dd, *J* = 268.8, 26.0 Hz), -118.6 (1F, dd, *J* = 268.8, 26.0 Hz). IR (neat, cm<sup>-1</sup>) 3511, 2987, 1739, 1333, 1197, 1144, 1020, 961, 910, 752, 697. HRMS (ESI<sup>+</sup>) calcd for C<sub>13</sub>H<sub>13</sub>F<sub>5</sub>O<sub>3</sub> [M+Na]<sup>+</sup>: 335.0677, found 335.0672.

Benzyl 4,4,5,5,6,6,6-heptafluoro-2-hydroxy-2-methylhexanoate (5dh)

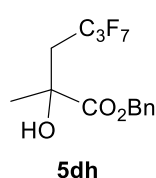

Yellow oil, 64.0 mg, yield: 71%. <sup>1</sup>H NMR (400 MHz, CDCl<sub>3</sub>) δ: 7.40–7.33 (5H, m), 5.22 (2H, dd, *J* = 18.2, 12.1 Hz), 3.46 (1H, s), 2.78–2.66 (1H, m), 2.56–2.43 (1H, m), 1.52 (3H, s). <sup>13</sup>C NMR (151 MHz, CDCl<sub>3</sub>) δ 175.1, 134.6, 129.0, 128.8 (2C), 128.7, 118.8–108.3 (3C, m), 71.5 (d, *J* = 1.5 Hz), 68.7, 39.1 (t, *J* = 19.6 Hz), 28.0. <sup>19</sup>F NMR (376 MHz, CDCl<sub>3</sub>) δ: -80.8 (3F, s), -111.6 (1F, dd, *J* = 277.4, 23.1 Hz), -115.8 (1F, dd, *J* = 277.4, 23.1 Hz), -128.7 (2F, s). IR (neat, cm<sup>-1</sup>) 3511, 2987, 1736, 1353, 1277, 1221, 1121, 971, 911, 726, 697. HRMS (ESI<sup>+</sup>) calcd for C<sub>14</sub>H<sub>13</sub>F<sub>7</sub>O<sub>3</sub> [M+Na]<sup>+</sup>: 385.0645, found 385.0646.

Benzyl 4,4,5,5,6,6,7,7,7-nonafluoro-2-hydroxy-2-methylheptanoate (5di)

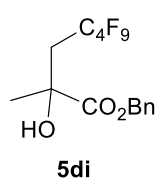

Yellow oil, 75.5 mg, yield: 73%. <sup>1</sup>H NMR (400 MHz, CDCl<sub>3</sub>) δ: 7.39–7.33 (5H, m), 5.23 (2H, dd, *J* = 15.1, 11.9 Hz), 3.47 (1H, s), 2.80–2.67 (1H, m), 2.57–2.43 (1H, m), 1.52 (3H, s). <sup>13</sup>C NMR (151 MHz, CDCl<sub>3</sub>) δ 175.1, 134.7, 129.0, 128.8 (2C), 128.7, 119.5–108.6 (4C, m), 71.5 (d, *J* = 3.0 Hz), 68.7, 39.3 (t, *J* = 20.4 Hz), 28.0. <sup>19</sup>F NMR (376 MHz, CDCl<sub>3</sub>) δ: -81.6 (3F, s), -110.7 (1F, d, *J* = 265.9 Hz), -114.9 (1F, d, *J* = 265.9 Hz), -125.3 (2F, s), 126.4 (2F, s). IR (neat, cm<sup>-1</sup>) 3518, 2987, 1739, 1353, 1301, 1217,

1132, 911, 882, 735, 697. HRMS (ESI<sup>+</sup>) calcd for C<sub>15</sub>H<sub>13</sub>F<sub>9</sub>O<sub>3</sub> [M+Na]<sup>+</sup>: 435.0613, found 435.0608.

**Benzyl 4,4,5,5,6,6,7,7,8,8,8-undecafluoro-2-hydroxy-2-methyloctanoate (5dj)**

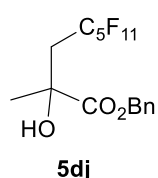

Yellow oil, 85.4 mg, yield: 74%. <sup>1</sup>H NMR (400 MHz, CDCl<sub>3</sub>) δ: 7.41–7.33 (5H, m), 5.23 (2H, dd, *J* = 14.2, 11.9 Hz), 3.47 (1H, s), 2.80–2.67 (1H, m), 2.57–2.44 (1H, m), 1.52 (3H, s). <sup>13</sup>C NMR (151 MHz, CDCl<sub>3</sub>) δ 175.1, 134.6, 129.0, 128.8 (2C), 128.7, 119.4–108.6 (5C, m), 71.5 (d, *J* = 3.0 Hz), 68.7, 39.4 (t, *J* = 20.4 Hz), 28.0. <sup>19</sup>F NMR (376 MHz, CDCl<sub>3</sub>) δ: -81.2 (3F, s), -110.5 (1F, d, *J* = 289.0 Hz), -114.7 (1F, d, *J* = 289.0 Hz), -123.0 (2F, s), -124.6 (2F, s), 126.8 (2F, s). IR (neat, cm<sup>-1</sup>) 3508, 2987, 1740, 1458, 1232, 1185, 1139, 874, 824, 697. HRMS (ESI<sup>+</sup>) calcd for C<sub>16</sub>H<sub>13</sub>F<sub>11</sub>O<sub>3</sub> [M+Na]<sup>+</sup>: 485.0581, found 485.0581.

**Benzyl 4,5,5,5-tetrafluoro-2-hydroxy-2-methyl-4-(trifluoromethyl)pentanoate (5dk)**

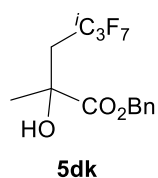

Yellow oil, 57.9 mg, yield: 64%. <sup>1</sup>H NMR (400 MHz, CDCl<sub>3</sub>) δ: 7.41–7.33 (5H, m), 5.21 (2H, dd, *J* = 75.6, 11.9 Hz), 3.47 (1H, s), 2.78–2.72 (1H, m), 2.55–2.46 (1H, m), 1.51 (3H, s). <sup>13</sup>C NMR (151 MHz, CDCl<sub>3</sub>) δ 175.0, 134.6, 129.0, 128.8, 128.7 (2C), 126.0–90.2 (3C, m), 71.6 (d, *J* = 4.5 Hz), 68.7, 37.0 (d, *J* = 18.1 Hz), 28.8. <sup>19</sup>F NMR (376 MHz, CDCl<sub>3</sub>) δ: -76.0 (3F, s), -78.2 (3F, m), -187.4 (1F, s). IR (neat, cm<sup>-1</sup>) 3518, 2987, 1739, 1277, 1224, 1155, 1129, 996, 960, 908, 696. HRMS (ESI<sup>+</sup>) calcd for C<sub>14</sub>H<sub>13</sub>F<sub>7</sub>O<sub>3</sub> [M+Na]<sup>+</sup>: 385.0645, found 385.0639.

**Benzyl 3-(1,2,2,3,3,4,4,5,5,6,6-undecafluorocyclohexyl)-2-hydroxy-2-methylpropanoate (5dl)**

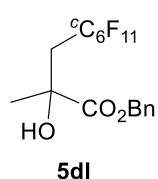

Yellow oil, 31.6 mg, yield: 27%. <sup>1</sup>H NMR (400 MHz, CDCl<sub>3</sub>) δ: 7.41–7.33 (5H, m), 5.22 (2H, dd, *J* = 67.8, 12.4 Hz), 3.49 (1H, s), 2.85–2.79 (1H, m), 2.65–2.56 (1H, m), 1.54 (3H, s). <sup>13</sup>C NMR (151 MHz, CDCl<sub>3</sub>) δ 175.0, 134.6, 129.0, 128.8 (3C), 119.1–90.5 (6C, m), 71.3 (d, *J* = 4.5 Hz), 68.7, 34.7 (d, *J* = 19.6 Hz), 28.9. <sup>19</sup>F NMR (376 MHz, CDCl<sub>3</sub>) δ: -117.6 (1F, d, *J* = 300.06 Hz), -119.4 (1F, d, *J* = 300.06 Hz), -122.9 (2F, dd, *J* = 277.4, 173.4 Hz), -124.6 (1F, d, *J* = 277.4 Hz), -131.3 (1F, d, *J* = 300.06 Hz), -134.5 (1F, d, *J* = 300.06 Hz), -139.5 (2F, dd, *J* = 289.0, 57.8 Hz), -142.7 (1F, d, *J* = 289.0 Hz), -187.2 (1F, s). IR (neat, cm<sup>-1</sup>) 3517, 2987, 1739, 1458, 1316, 1221, 1142, 983, 967, 904, 697. HRMS (ESI<sup>+</sup>) calcd for C<sub>17</sub>H<sub>13</sub>F<sub>11</sub>O<sub>3</sub> [M+Na]<sup>+</sup>: 497.0581, found 497.0573.

Benzyl 5,5,5-trifluoro-2-hydroxy-2-methylpentanoate (5dm)

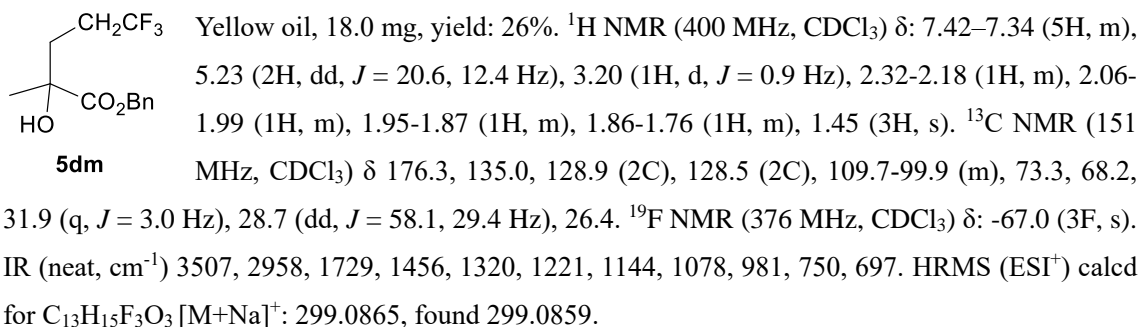

Benzyl 5,5,6,6,7,7,7-heptafluoro-2-hydroxy-2-methylheptanoate (5dn)

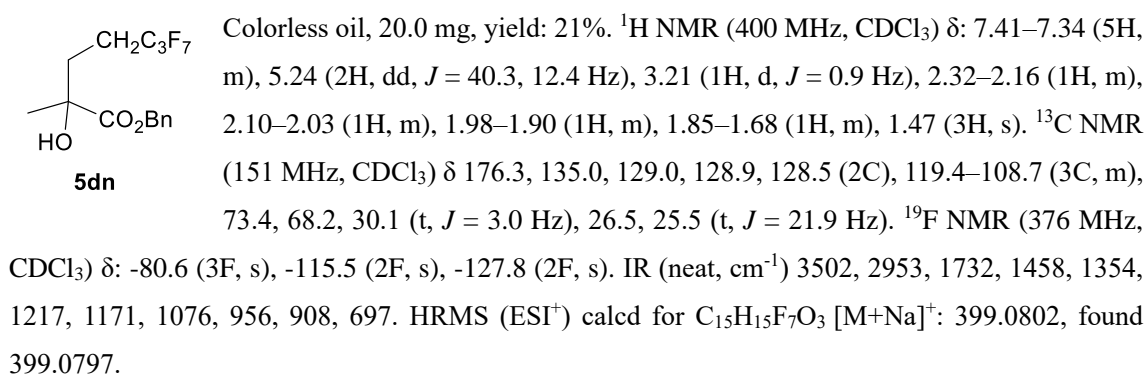

3,3,4,4,5,5,6,6,7,7,8,8,8-Tridecafluoro-1-phenyloctan-1-ol (7aa)

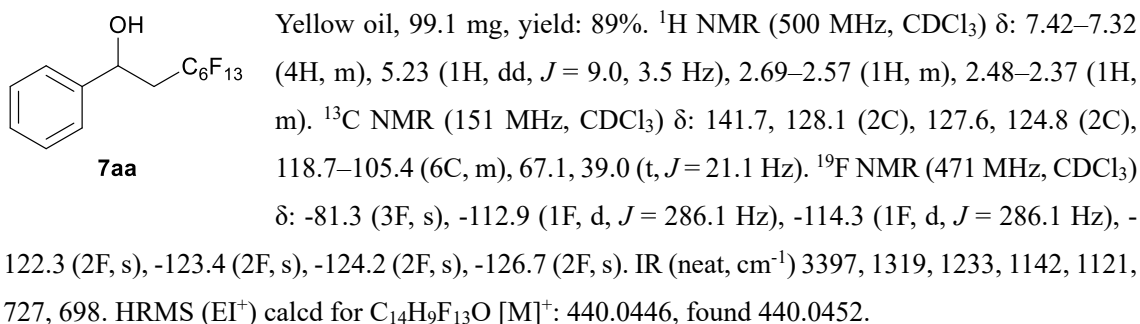

3,3,4,4,5,5,6,6,7,7,8,8,8-Tridecafluoro-1-(4-tolyl)octan-1-ol (7ba)

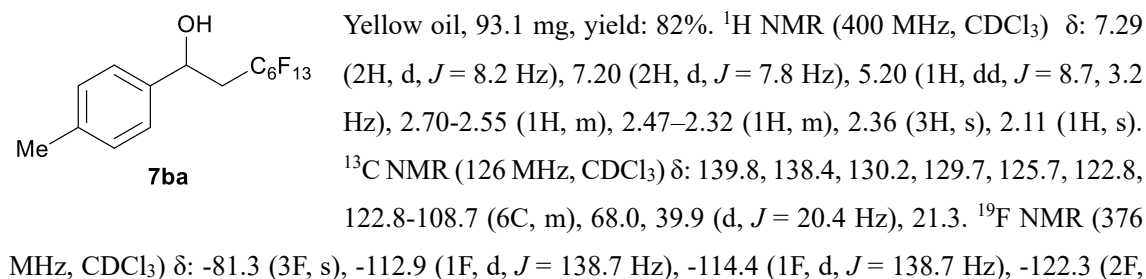

s), -123.4 (2F, s), -124.1 (2F, s), -126.6 (2F, s). IR (neat,  $\text{cm}^{-1}$ ) 3385, 1517, 1364, 1228, 1121, 1073, 921, 746, 704. HRMS ( $\text{EI}^+$ ) calcd for  $\text{C}_{15}\text{H}_{11}\text{F}_{13}\text{O}$  [ $\text{M}]^+$ : 454, 0602, found 454.0602.

**3,3,4,4,5,5,6,6,7,7,8,8,8-Tridecafluoro-1-(4-methoxyphenyl)octan-1-ol (7ca)**

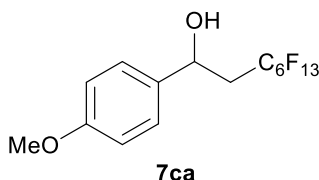

Yellow oil, 102.1 mg, yield: 87%.  $^1\text{H}$  NMR (400 MHz,  $\text{CDCl}_3$ )  $\delta$ : 7.31 (2H, d,  $J = 6.4$  Hz), 6.91 (2H, d,  $J = 6.4$  Hz), 5.17 (1H, dd,  $J = 8.7, 3.7$  Hz), 3.81 (3H, s), 2.70–2.54 (1H, m), 2.47–2.32 (1H, m).  $^{13}\text{C}$  NMR (126 MHz,  $\text{CDCl}_3$ )  $\delta$ : 159.8, 135.0, 132.9–108.8 (6C, m), 127.1 (2C), 114.4 (2C), 67.7, 55.5, 39.9 (t,  $J = 21.0$  Hz).  $^{19}\text{F}$  NMR (376 MHz,  $\text{CDCl}_3$ )  $\delta$ : -81.3 (3F, s), -113.0 (1F, d,  $J = 288.9$  Hz), -114.4 (1F, d,  $J = 288.9$  Hz), -122.3 (2F, s), -123.4 (2F, s), -124.1 (2F, s), -126.6 (2F, s). IR (neat,  $\text{cm}^{-1}$ ) 3436, 2842, 1660, 1614, 1515, 1235, 1144, 1036, 834, 731. HRMS ( $\text{EI}^+$ ) calcd for  $\text{C}_{15}\text{H}_{11}\text{F}_{13}\text{O}_2$  [ $\text{M}]^+$ : 470.0551, found 470.0591.

**1-(4-(Tert-butyl)phenyl)-3,3,4,4,5,5,6,6,7,7,8,8,8-tridecafluorooctan-1-ol (7da)**

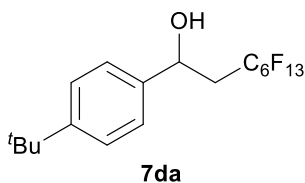

Yellow oil, 96.7 mg, yield: 78%.  $^1\text{H}$  NMR (400 MHz,  $\text{CDCl}_3$ )  $\delta$ : 7.43–7.40 (2H, m), 7.33–7.25 (2H, m), 5.20 (1H, dd,  $J = 10.0, 5.0$  Hz), 2.69–2.56 (1H, m), 2.47–2.36 (1H, m), 2.18 (1H, s), 1.32 (9H, s).  $^{13}\text{C}$  NMR (126 MHz,  $\text{CDCl}_3$ )  $\delta$ : 151.7, 139.8, 130.2, 128.4, 126.0, 125.5, 119.7–109.4 (6C, m), 67.9, 39.9 ( $J = 20.4$  Hz), 34.7, 31.4 (3C).  $^{19}\text{F}$  NMR (471 MHz,  $\text{CDCl}_3$ )  $\delta$ : -81.3 (3F, s), -112.9 (1F, d,  $J = 270.8$  Hz), -114.5 (1F, d,  $J = 270.8$  Hz), -122.3 (2F, s), -123.4 (2F, s), -124.1 (2F, s), -126.6 (2F, s). IR (neat,  $\text{cm}^{-1}$ ) 3408, 2967, 2874, 1364, 1235, 1144, 1073, 836, 731, 702. HRMS ( $\text{EI}^+$ ) calcd for  $\text{C}_{18}\text{H}_{17}\text{F}_{13}\text{O}$  [ $\text{M}]^+$ : 496.1071, found 496.1085.

**1-(Biphenyl-4-yl)-3,3,4,4,5,5,6,6,7,7,8,8,8-tridecafluorooctan-1-ol (7ea)**

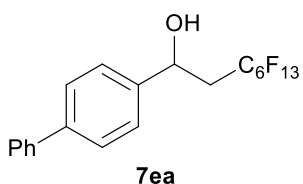

White solid, 104.9 mg, yield: 81%.  $^1\text{H}$  NMR (400 MHz,  $\text{CDCl}_3$ )  $\delta$ : 7.62–7.57 (4H, m), 7.50–7.43 (4H, m), 7.38–7.34 (1H, m), 5.29–5.25 (1H, m), 2.74–2.56 (1H, m), 2.53–2.39 (1H, m), 2.29 (1H, d,  $J = 1.8$  Hz).  $^{13}\text{C}$  NMR (151 MHz,  $\text{CDCl}_3$ )  $\delta$ : 141.7, 141.6, 140.6, 132.6, 130.2, 129.0, 128.4, 127.8, 127.7, 127.3, 126.2, 120.2–108.4, 67.9, 40.0 (t,  $J = 20.4$  Hz).  $^{19}\text{F}$  NMR (471 MHz,  $\text{CDCl}_3$ )  $\delta$ : -81.2 (3F, s), -112.8 (1F, d,  $J = 134.9$  Hz), -114.2 (1F, d,  $J = 134.9$  Hz), -122.2 (2F, s), -123.3 (2F, s), -124.0 (2F, s), -126.6 (2F, s). IR (neat,  $\text{cm}^{-1}$ ) 3299, 1234, 1189, 1144, 1007, 839, 766, 692, 651. HRMS ( $\text{ESI}^+$ ) calcd for  $\text{C}_{20}\text{H}_{13}\text{F}_{13}\text{O}$  [ $\text{M}+\text{Na}]^+$ : 539.0651, found 539.0644.

1-(4-Chlorophenyl)-3,3,4,4,5,5,6,6,7,7,8,8,8-tridecafluorooctan-1-ol (7fa)

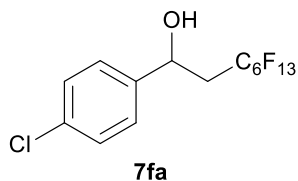

**7fa**

Yellow oil, 105.0 mg, yield: 88%. <sup>1</sup>H NMR (500 MHz, CDCl<sub>3</sub>) δ: 7.36–7.34 (4H, m), 5.22 (1H, dt, *J* = 5.9, 2.8 Hz), 2.63–2.57 (1H, m), 2.44–2.33 (1H, m), 2.20 (1H, s). <sup>13</sup>C NMR (151 MHz, CDCl<sub>3</sub>) δ: 141.1, 134.3, 129.3–106.9 (6C, m), 129.2 (2C), 127.2 (2C), 129.7–106.9 (6C, m), 67.5, 40.0 (t, *J* = 21.1 Hz). <sup>19</sup>F NMR (471 MHz, CDCl<sub>3</sub>) δ: -81.3 (3F, s), -113.2 (1F, d, *J* = 136.2 Hz), -114.4 (1F, d, *J* = 136.2 Hz), -122.3 (2F, s), -123.4 (2F, s), -124.1 (2F, s), -126.7 (2F, s). IR (neat, cm<sup>-1</sup>) 3385, 3069, 2984, 2903, 1233, 1190, 1142, 1121, 1092, 812, 700. HRMS (EI<sup>+</sup>) calcd for C<sub>14</sub>H<sub>8</sub>ClF<sub>13</sub>O [M]<sup>+</sup>: 474.0056, found 474.0043.

3,3,4,4,5,5,6,6,7,7,8,8,8-Tridecafluoro-1-(4-fluorophenyl)octan-1-ol (7ga)

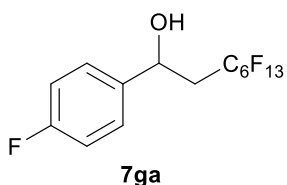

**7ga**

Yellow oil, 100.0 mg, yield: 87%. <sup>1</sup>H NMR (500 MHz, CDCl<sub>3</sub>) δ: 7.38 (2H, m), 7.10–7.06 (2H, m), 5.22 (1H, dd, *J* = 8.7, 3.3 Hz), 2.67–2.55 (1H, m), 2.45–2.34 (1H, m). <sup>13</sup>C NMR (151 MHz, CDCl<sub>3</sub>) δ: 162.7 (d, *J* = 247.5 Hz), 138.5 (d, *J* = 3.0 Hz), 127.6 (2C, d, *J* = 9.0 Hz), 119.6–110.3 (6C, m), 115.9 (2C, d, *J* = 22.6 Hz), 67.5, 40.1 (t, *J* = 21.1 Hz). <sup>19</sup>F NMR (471 MHz, CDCl<sub>3</sub>) δ: -81.3 (3F, s), -113.2 (1F, d, *J* = 286.1 Hz), -114.4 (1F, d, *J* = 286.1 Hz), -114.0 (1F, s), -122.3 (2F, s), -123.4 (2F, s), -124.1 (2F, s), -126.7 (2F, s). IR (neat, cm<sup>-1</sup>) 3405, 2357, 1670, 1607, 1229, 1188, 1142, 1121, 837, 704. HRMS (EI<sup>+</sup>) calcd for C<sub>14</sub>H<sub>8</sub>F<sub>14</sub>O [M]<sup>+</sup>: 458.0352, found 458.0394.

3,3,4,4,5,5,6,6,7,7,8,8,8-Tridecafluoro-1-(4-(trifluoromethyl)phenyl)octan-1-ol (7ha)

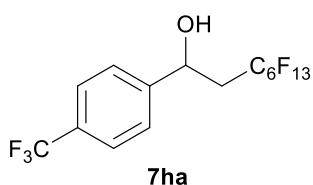

**7ha**

Yellow oil, 94.0 mg, yield: 74%. <sup>1</sup>H NMR (500 MHz, CDCl<sub>3</sub>) δ: 7.66 (2H, d, *J* = 8.0 Hz), 7.54 (2H, d, *J* = 8.0 Hz), 5.31 (1H, d, *J* = 8.6 Hz), 2.68–2.56 (1H, m), 2.48–2.36 (1H, m), 2.28 (1H, s). <sup>13</sup>C NMR (151 MHz, CDCl<sub>3</sub>) δ: 146.3, 132.6, 130.8 (dd, *J* = 64.9, 33.2 Hz), 130.2, 128.3, 126.2, 126.0 (q, *J* = 3.0 Hz), 121.3–106.4 (6C, m), 67.5, 40.1 (t, *J* = 21.1 Hz). <sup>19</sup>F NMR (471 MHz, CDCl<sub>3</sub>) δ: -63.2 (3F, s), -81.3 (3F, s), -112.9 (1F, d, *J* = 277.9 Hz), -114.0 (1F, d, *J* = 277.9 Hz), -122.2 (2F, s), -123.3 (2F, s), -124.1 (2F, s), -126.6 (2F, s). IR (neat, cm<sup>-1</sup>) 3374, 3038, 1669, 1622, 1325, 1235, 1167, 1123, 1069, 845, 696. HRMS (EI<sup>+</sup>) calcd for C<sub>15</sub>H<sub>8</sub>F<sub>16</sub>O [M]<sup>+</sup>: 508.0320, found 508.0271.

3,3,4,4,5,5,6,6,7,7,8,8,8-Tridecafluoro-1-(4-nitrophenyl)octan-1-ol (7ia)

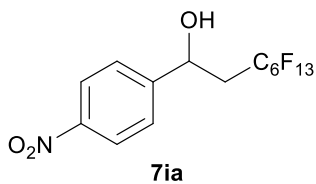

**7ia**

Yellow oil, 47.9 mg, yield: 39%. <sup>1</sup>H NMR (500 MHz, CDCl<sub>3</sub>) δ: 8.28–8.24 (2H, m), 7.60 (2H, d, *J* = 9.2 Hz), 5.39–5.35 (1H, m), 2.71–2.56 (1H, m), 2.49–2.36 (2H, m). <sup>13</sup>C NMR (151 MHz, CDCl<sub>3</sub>) δ: 149.6, 147.9, 126.8 (2C), 124.3 (2C), 120.1–108.4 (6C, m), 67.2, 40.1 (t, *J* =

21.1 Hz).  $^{19}\text{F}$  NMR (471 MHz,  $\text{CDCl}_3$ )  $\delta$ : -81.3 (3F, s), -112.8 (1F, d,  $J = 272.5$  Hz), -113.7 (1F, d,  $J = 272.5$  Hz), -122.2 (2F, s), -123.3 (2F, s), -124.0 (2F, s), -126.6 (2F, s). IR (neat,  $\text{cm}^{-1}$ ) 3424, 2899, 1601, 1518, 1352, 1233, 1188, 1142, 1123, 855, 694. HRMS ( $\text{EI}^+$ ) calcd for  $\text{C}_{14}\text{H}_8\text{F}_{13}\text{NO}_3$  [ $\text{M}$ ] $^+$ : 485.0297, found 485.0250.

1-(2-Chlorophenyl)- 3,3,4,4,5,5,6,6,7,7,8,8,8-tridecafluorooctan-1-ol (7ja)

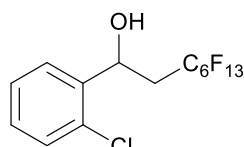

**7ja**

Yellow oil, 86.4 mg, yield: 73%.  $^1\text{H}$  NMR (500 MHz,  $\text{CDCl}_3$ )  $\delta$ : 7.66 (1H, dd,  $J = 7.7, 1.7$  Hz), 7.36 (2H, ddd,  $J = 15.8, 7.7, 1.4$  Hz), 7.27 (1H, td,  $J = 7.7, 1.7$  Hz), 5.65 (1H, dd,  $J = 9.2, 1.4$  Hz), 2.59-2.39 (2H, m), 2.31 (1H, s).  $^{13}\text{C}$  NMR (151 MHz,  $\text{CDCl}_3$ )  $\delta$ : 139.9, 131.3, 129.8, 129.5, 127.6, 127.1, 120.0-106.6 (6C, m), 64.8 (d,  $J = 4.5$  Hz), 38.4 (t,  $J = 21.1$  Hz).  $^{19}\text{F}$  NMR (471 MHz,  $\text{CDCl}_3$ )  $\delta$ : -81.3 (3F, s), -112.8 (1F, d,  $J = 272.5$  Hz), -115.1 (1F, d,  $J = 272.5$  Hz), -122.3 (2F, s), -123.4 (2F, s), -124.2 (2F, s), -126.6 (2F, s). IR (neat,  $\text{cm}^{-1}$ ) 3462, 3065, 3003, 2971, 2947, 1231, 1204, 1142, 1074, 754, 702. HRMS ( $\text{EI}^+$ ) calcd for  $\text{C}_{14}\text{H}_8\text{ClF}_{13}\text{O}$  [ $\text{M}$ ] $^+$ : 474.0056, found 474.0029.

1-(3-Chlorophenyl)- 3,3,4,4,5,5,6,6,7,7,8,8,8-tridecafluorooctan-1-ol (7ka)

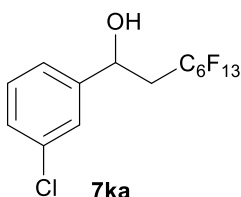

**7ka**

Yellow oil, 95.0 mg, yield: 80%.  $^1\text{H}$  NMR (500 MHz,  $\text{CDCl}_3$ )  $\delta$ : 7.42 (1H, t,  $J = 1.7$  Hz), 7.36-7.27 (3H, m), 5.22 (1H, dd,  $J = 8.9, 4.4$  Hz), 2.63-2.57 (1H, m), 2.42-2.38 (1H, m), 2.24 (1H, s).  $^{13}\text{C}$  NMR (151 MHz,  $\text{CDCl}_3$ )  $\delta$ : 144.5, 135.0, 130.4, 128.7, 126.0, 123.9, 120.2-108.5 (6C, m), 67.5, 40.1 (t,  $J = 21.1$  Hz).  $^{19}\text{F}$  NMR (471 MHz,  $\text{CDCl}_3$ )  $\delta$ : -81.3 (3F, s), -113.2 (1F, d,  $J = 140.8$  Hz), -114.4 (1F, d,  $J = 140.8$  Hz), -122.3 (2F, s), -123.4 (2F, s), -124.1 (2F, s), -126.6 (2F, s). IR (neat,  $\text{cm}^{-1}$ ) 3401, 3065, 2978, 2895, 1669, 1233, 1188, 1142, 1074, 812, 694. HRMS ( $\text{EI}^+$ ) calcd for  $\text{C}_{14}\text{H}_8\text{ClF}_{13}\text{O}$  [ $\text{M}$ ] $^+$ : 474.0056, found 474.0011.

3,3,4,4,5,5,6,6,7,7,8,8,8-Tridecafluoro-1-(2,3,4,5,6-pentafluorophenyl)octan-1-ol (7la)

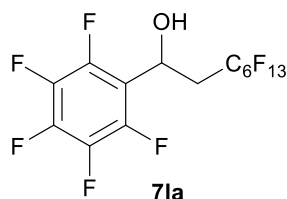

**7la**

Yellow oil, 83.3 mg, yield: 63%.  $^1\text{H}$  NMR (500 MHz,  $\text{CDCl}_3$ )  $\delta$ : 5.60 (1H, dd,  $J = 12.9, 6.6$  Hz), 3.01-2.89 (1H, m), 2.73-2.61 (1H, m), 2.44 (1H, d,  $J = 6.6$  Hz).  $^{13}\text{C}$  NMR (151 MHz,  $\text{CDCl}_3$ )  $\delta$ : 145.8-135.1 (5C, m), 132.6, 118.2-110.3 (6C, m), 59.5, 37.3 (t,  $J = 21.1$  Hz).  $^{19}\text{F}$  NMR (471 MHz,  $\text{CDCl}_3$ )  $\delta$ : -81.5 (3F, s), -113.8 (1F, d,  $J = 272.5$  Hz), -114.6 (1F, d,  $J = 272.5$  Hz), -122.5 (2F, s), -123.6 (2F, s), -124.3 (2F, s), -126.9 (2F, s), -143.9 (2F, s), -153.3 (1F, t,  $J = 21.6$  Hz), -161.4 (2F, t,  $J = 21.6$  Hz). IR (neat,  $\text{cm}^{-1}$ ) 3495, 1505, 1233, 1190, 1142, 1121. HRMS ( $\text{EI}^+$ ) calcd for  $\text{C}_{14}\text{H}_4\text{F}_{18}\text{O}$  [ $\text{M}$ ] $^+$ : 529.9975, found 529.9951.

4,4,5,5,6,6,7,7,8,8,9,9,9-Tridecafluoro-2-phenylnonan-2-ol (7ma)

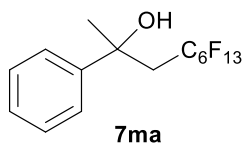

Yellow oil, 102.3 mg, yield: 90%.  $^1\text{H NMR}$  (400MHz,  $\text{CDCl}_3$ )  $\delta$ : 7.50–7.25 (5H, m), 2.74–2.43 (2H, m), 1.76 (3H, d,  $J = 4.0$  Hz).  $^{13}\text{C NMR}$  (126 MHz,  $\text{CDCl}_3$ )  $\delta$ : 146.6, 128.5 (2C), 127.5, 124.4 (2C), 118.7–105.7 (6C, m), 72.9, 42.6 (t,  $J = 19.8$  Hz), 30.2.  $^{19}\text{F NMR}$  (376MHz,  $\text{CDCl}_3$ )  $\delta$ : -81.3 (3F, s), -110.9 (1F, d,  $J = 274.6$  Hz), -113.5 (1F, d,  $J = 274.6$  Hz), -122.2 (2F, s), -123.4 (2F, s), -124.2 (2F, s), -126.7 (2F, s). IR (neat,  $\text{cm}^{-1}$ ) 2953, 2918, 2851, 1235, 1190, 1167, 1145, 1121, 698. HRMS ( $\text{EI}^+$ ) calcd for  $\text{C}_{15}\text{H}_{11}\text{F}_{13}\text{O}$  [ $\text{M}$ ] $^+$ : 454.0602, found 454.0595.

2-(4-Chlorophenyl)-4,4,5,5,6,6,7,7,8,8,9,9,9-tridecafluorononan-2-ol (7na)

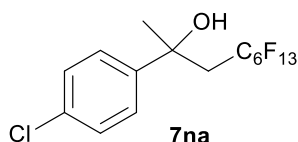

Yellow oil, 98.0 mg, yield: 80%.  $^1\text{H NMR}$  (500 MHz,  $\text{CDCl}_3$ )  $\delta$ : 7.42 (2H, d,  $J = 8.7$  Hz), 7.34 (2H, d,  $J = 8.7$  Hz), 2.71–2.48 (2H, m), 2.28 (1H, s), 1.75 (3H, s).  $^{13}\text{C NMR}$  (151 MHz,  $\text{CDCl}_3$ )  $\delta$ : 145.0, 133.4, 132.6, 130.2, 128.7, 128.4, 126.1, 120.3–108.4 (6C, m), 72.7, 42.6 (t,  $J = 19.6$  Hz), 30.5.  $^{19}\text{F NMR}$  (471 MHz,  $\text{CDCl}_3$ )  $\delta$ : -81.3 (6F, s), -110.9 (1F, d,  $J = 271.7$  Hz), -113.4 (1F, d,  $J = 271.7$  Hz), -122.2 (2F, s), -123.4 (2F, s), -124.2 (2F, s), -126.7 (2F, s). IR (neat,  $\text{cm}^{-1}$ ) 3464, 2984, 1491, 1233, 1190, 1165, 1142, 1119, 1013, 831. HRMS ( $\text{EI}^+$ ) calcd for  $\text{C}_{15}\text{H}_{10}\text{ClF}_{13}\text{O}$  [ $\text{M}$ ] $^+$ : 488.0213, found 488.0188.

3,3,4,4,5,5,6,6,7,7,8,8,8-Tridecafluoro-1,1-diphenyloctan-1-ol (7oa)

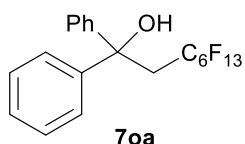

Yellow oil, 89.3 mg, yield: 69%.  $^1\text{H NMR}$  (400 MHz,  $\text{CDCl}_3$ )  $\delta$ : 7.45–7.42 (4H, m), 7.36–7.31 (4H, m), 7.28–7.24 (2H, m), 3.17 (2H, t,  $J = 18.3$  Hz), 2.74 (1H, t,  $J = 2.1$  Hz).  $^{13}\text{C NMR}$  (151 MHz,  $\text{CDCl}_3$ )  $\delta$ : 145.5 (2C), 137.7, 132.6, 130.2, 128.6 (2C), 128.4, 127.7 (2C), 125.5 (2C), 120.1–108.4 (6C, m), 76.6, 41.0 (t,  $J = 19.6$  Hz).  $^{19}\text{F NMR}$  (376 MHz,  $\text{CDCl}_3$ )  $\delta$ : -81.3 (3F, s), -109.5 (2F, s), -122.1 (2F, s), -123.3 (2F, s), -124.1 (2F, s), -126.6 (2F, s). IR (neat,  $\text{cm}^{-1}$ ) 3470, 3088, 3061, 2971, 3028, 1655, 1495, 1233, 1188, 1142, 1121, 812, 696. HRMS ( $\text{ESI}^-$ ) calcd for  $\text{C}_{20}\text{H}_{13}\text{F}_{13}\text{O}$  [ $\text{M}-\text{H}$ ] $^-$ : 515.0681, found 515.0641.

3,3,4,4,5,5,6,6,7,7,8,8,8-Tridecafluoro-1-(naphthalen-2-yl)octan-1-ol (7pa)

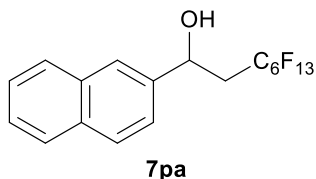

White solid, 69.6 mg, yield: 56%.  $^1\text{H NMR}$  (400 MHz,  $\text{CDCl}_3$ )  $\delta$ : 7.89–7.79 (4H, m), 7.53–7.25 (3H, m), 5.41–5.37 (1H, m), 2.79–2.63 (1H, m), 2.57–2.44 (1H, m), 2.34 (1H, d,  $J = 11.8$  Hz).  $^{13}\text{C NMR}$  (151 MHz,  $\text{CDCl}_3$ )  $\delta$ : 140.1, 133.3 (d,  $J = 3.0$  Hz), 130.2, 129.1, 128.4, 128.2, 127.9, 126.6 (d,  $J = 24.2$  Hz), 124.8, 123.4, 119.7–108.4 (6C, m), 68.2, 40.0 (t,  $J = 21.1$  Hz).  $^{19}\text{F NMR}$  (376 MHz,  $\text{CDCl}_3$ )  $\delta$ : -81.3 (3F, s), -112.8 (1F, d,  $J = 129.1$  Hz), -

114.2 (1F, d,  $J = 129.1$  Hz), -122.2 (2F, s), -123.3 (2F, s), -124.1 (2F, s), -126.6 (2F, s). IR (neat,  $\text{cm}^{-1}$ ) 3321, 1364, 1234, 1194, 1144, 1073, 1017, 826, 745, 692. HRMS ( $\text{EI}^+$ ) calcd for  $\text{C}_{18}\text{H}_{11}\text{F}_{13}\text{O}$  [ $\text{M}]^+$ : 490.0602, found 490.0620.

2-(1,1,2,2,3,3,4,4,5,5,6,6,6-Tridecafluorohexyl)-1,2,3,4-tetrahydronaphthalen-1-ol (7qa)

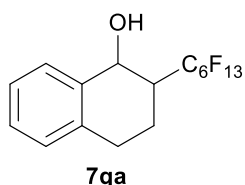

(84: 16 diastereomer mixture, dr was measured by HPLC)

Yellow oil, 75.2 mg, yield: 55%.  $^1\text{H}$  NMR (500 MHz,  $\text{CDCl}_3$ )  $\delta$ : 7.51–7.12 (major and minor, 4H, m), 5.14 (major, 1H, d,  $J = 6.5$  Hz), 5.11 (minor, 1H, s), 2.92–2.75 (major and minor, 3H, m), 2.33–2.01 (major and minor, 2H, m), 1.92–1.84 (major and minor, 1H, m).  $^{13}\text{C}$  NMR (151 MHz,  $\text{CDCl}_3$ )  $\delta$ : 136.7 (minor), 136.4 (major), 132.6 (minor), 130.2 (major), 129.3 (minor), 129.0 (minor), 128.8 (major), 128.5 (major), 128.4 (minor), 128.2 (major), 127.0 (major), 126.8 (minor), 121.0–106.9 (major and minor, 6C, m), 66.9 (major), 66.1 (minor), 45.6 (major, t,  $J = 19.6$  Hz), 42.4 (minor, t,  $J = 19.6$  Hz), 28.5 (minor), 27.5 (major), 20.6 (major), 16.2 (minor).  $^{19}\text{F}$  NMR (471 MHz,  $\text{CDCl}_3$ )  $\delta$ : -81.3 (3F, s), -113.8 (major, 1F, d,  $J = 283.3$  Hz), -114.7 (minor, 1F, d,  $J = 283.3$  Hz), -116.2 (minor, 1F, d,  $J = 283.3$  Hz), -117.3 (major, 1F, d,  $J = 283.3$  Hz), -120.6–1234.0 (6F, m), -125.8–127.3 (2F, m). IR (neat,  $\text{cm}^{-1}$ ) 3447, 3063, 3013, 2986, 2936, 2884, 1491, 1451, 1227, 1190, 1179, 1142, 1121, 1045, 743. HRMS ( $\text{EI}^+$ ) calcd for  $\text{C}_{16}\text{H}_{11}\text{F}_{13}\text{O}$  [ $\text{M}]^+$ : 466.0602, found 466.0565. HPLC: GL Science Inc. Inertsil<sup>®</sup> Diol column; detected at 294 nm; hexane/ethanol, 95/5; flow = 1.0 mL/min; retention times: 6.20 min, 8.65 min.

3,3,4,4,5,5,6,6,7,7,8,8,8-Tridecafluoro-2-methyl-1-phenyloctan-1-ol (7ra)

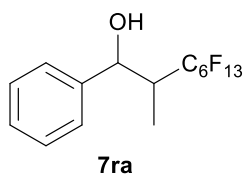

(76: 24 diastereomer mixture, dr was measured by HPLC.)

Yellow oil, 21.9 mg, yield: 19%.  $^1\text{H}$  NMR (500 MHz,  $\text{CDCl}_3$ )  $\delta$ : 7.47–7.27 (major and minor, 5H, m), 5.44 (major, 1H, s), 5.04 (minor, 1H, dd,  $J = 6.7$ , 1.0 Hz), 2.88–2.79 (minor, 1H, m), 2.62–2.51 (major, 1H, m), 2.15 (minor, 1H, s), 1.95 (major, 1H, d,  $J = 3.2$  Hz), 1.08 (major, 3H, dd,  $J = 7.0$ , 1.0 Hz), 0.91 (minor, 3H, d,  $J = 6.9$  Hz).  $^{13}\text{C}$  NMR (151 MHz,  $\text{CDCl}_3$ )  $\delta$ : 141.6 (major), 140.9 (minor), 128.7 (minor, 2C), 128.6 (major, 2C), 127.8 (major), 127.2 (minor), 125.6 (major, 2C), 125.5 (minor, 2C), 119.5–109.2 (major and minor, 6C, m), 73.1 (minor, d,  $J = 4.5$  Hz), 69.7 (major, d,  $J = 4.5$  Hz), 43.4 (major and minor, t,  $J = 19.6$  Hz), 10.1 (minor), 5.3 (major).  $^{19}\text{F}$  NMR (471 MHz,  $\text{CDCl}_3$ )  $\delta$ : -81.3 (3F, s), -112.1 (minor, 1F, d,  $J = 286.1$  Hz), -114.9 (major, 1F, d,  $J = 272.5$  Hz), -116.8 (major, 1F, d,  $J = 272.5$  Hz), -117.3 (minor, 1F, d,  $J = 286.1$  Hz), -120.1–123.3 (6F, m), -124.1–127.3 (2F, m). IR (neat,  $\text{cm}^{-1}$ ) 3464, 3065, 3028, 2998, 2970, 1670, 1233, 1194, 1142, 1123, 746, 698. HRMS ( $\text{EI}^+$ ) calcd for  $\text{C}_{15}\text{H}_{11}\text{F}_{13}\text{O}$  [ $\text{M}]^+$ : 454.0602, found 454.0560. HPLC: GL Science Inc. Inertsil<sup>®</sup> Diol column; detected at 294 nm; hexane/ethanol, 95/5; flow = 1.0 mL/min; retention times: 4.44 min, 4.77 min.



## **8. References**

1. E. He. Min, K. H. Wong, E. Setijadi, F. Ladouceur, M. Straton and A. Argyros, *Polym. Chem.*, 2011, **2**, 2045–2051.
2. N. S. Sheikh, *RSC Adv.*, 2015, **5**, 3941–3953.
3. T. Yajima, C. Saito and H. Nagano, *Tetrahedron*, 2005, **61**, 10203–10215.
4. Y. Xiao, Y.-K. Chun, S.-C. Cheng, C.-O. Ng, M.-K. Tse, N.-Y. Lei, R. Liu and C.-C. Ko, *Catal. Sci. Technol.*, 2021, **11**, 556–562.
5. G. Bélanger, M. Doré, F. Ménard and V. Darsigny, *J. Org. Chem.*, 2006, **71**, 7481–7484.
6. (a) T. Yajima, K. Yamaguchi, R. Hirokane and E. Nogami, *J. Fluorine Chem.*, 2013, **150**, 1–7; (b) H. Schedel, W. Dmowski and K. Burger, *Synthesis*, 2000, **12**, 1681–1688.
7. (a) X. Sun, W. Wang, Y. Li, J. Ma and S. Yu, *Org. Lett.*, 2016, **18**, 4638–4641; (b) Y. Wang, J. Wang, G.-X. Li, G. He and G. Chen, *Org. Lett.*, 2017, **19**, 1442–1445.
8. P. Job, *Justus Liebigs Ann. Chem.* 1928, **9**, 113–203.
9. (a) P. Berkeley and M. W. Hanna, *J. Physic. Chem.* 1963, **67**, 846–849; (b) M. W. Hanna and A. L. Ashbaugh, *J. Physic. Chem.* 1964, **68**, 811–816; (c) R. Foster and C. A. Fyfe, *Trans. Faraday Soc.* 1965, **61**, 1626–1631.
10. Y. Shen, N. Lei, C. Lu, D. Xi, X. Geng, P. Tao, Z. Su and K. Zheng, *Chem. Sci.*, 2021, **12**, 15399–15406.

## 9. $^1\text{H}$ , $^{13}\text{C}$ and $^{19}\text{F}$ NMR spectra

**5aa:**  $^1\text{H}$  NMR ( $\text{CDCl}_3$ , 400 MHz)

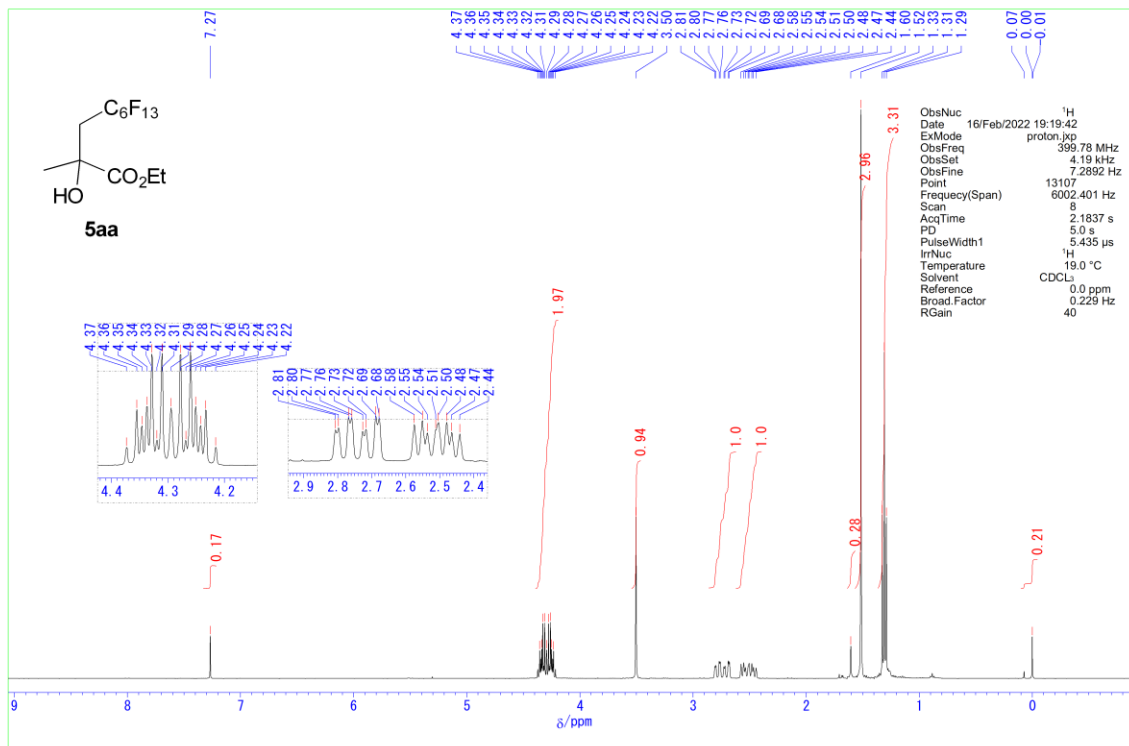

**5aa:**  $^{13}\text{C}$  NMR ( $\text{CDCl}_3$ , 151 MHz)

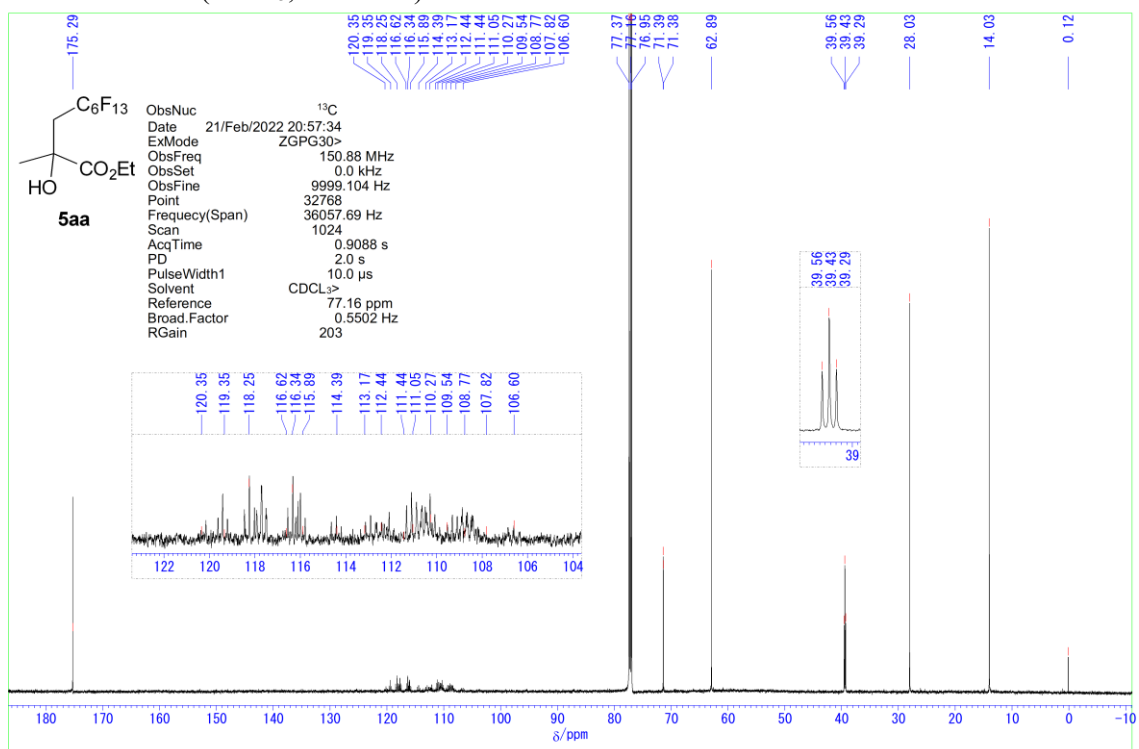

**5aa:**  $^{19}\text{F}$  NMR ( $\text{CDCl}_3$ , 376 MHz)

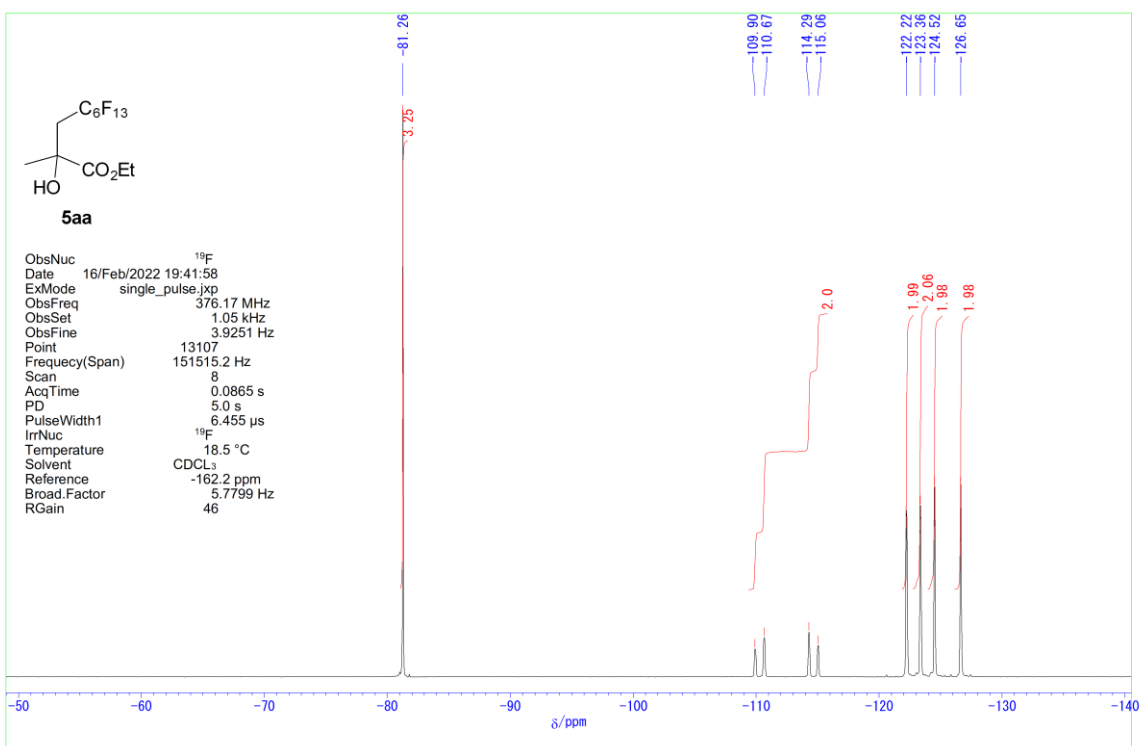

**5ba:**  $^1\text{H}$  NMR ( $\text{CDCl}_3$ , 500 MHz)

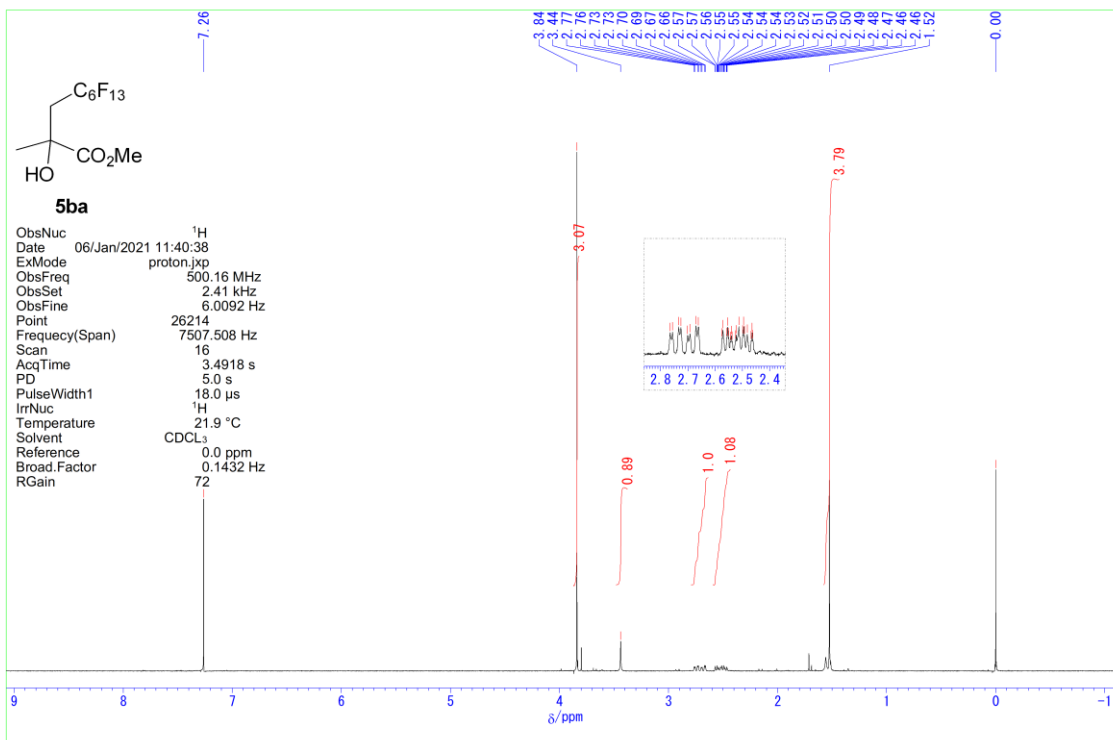

**5ba:**  $^{13}\text{C}$  NMR ( $\text{CDCl}_3$ , 151 MHz)

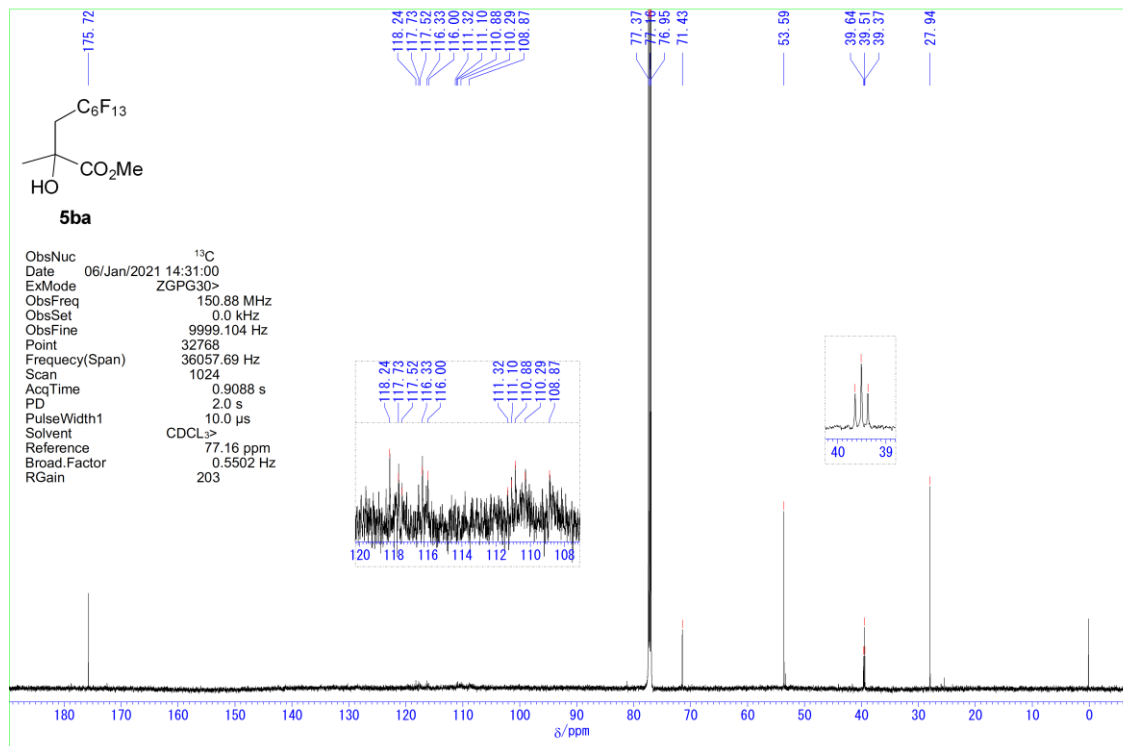

**5ba:**  $^{19}\text{F}$  NMR ( $\text{CDCl}_3$ , 471 MHz)

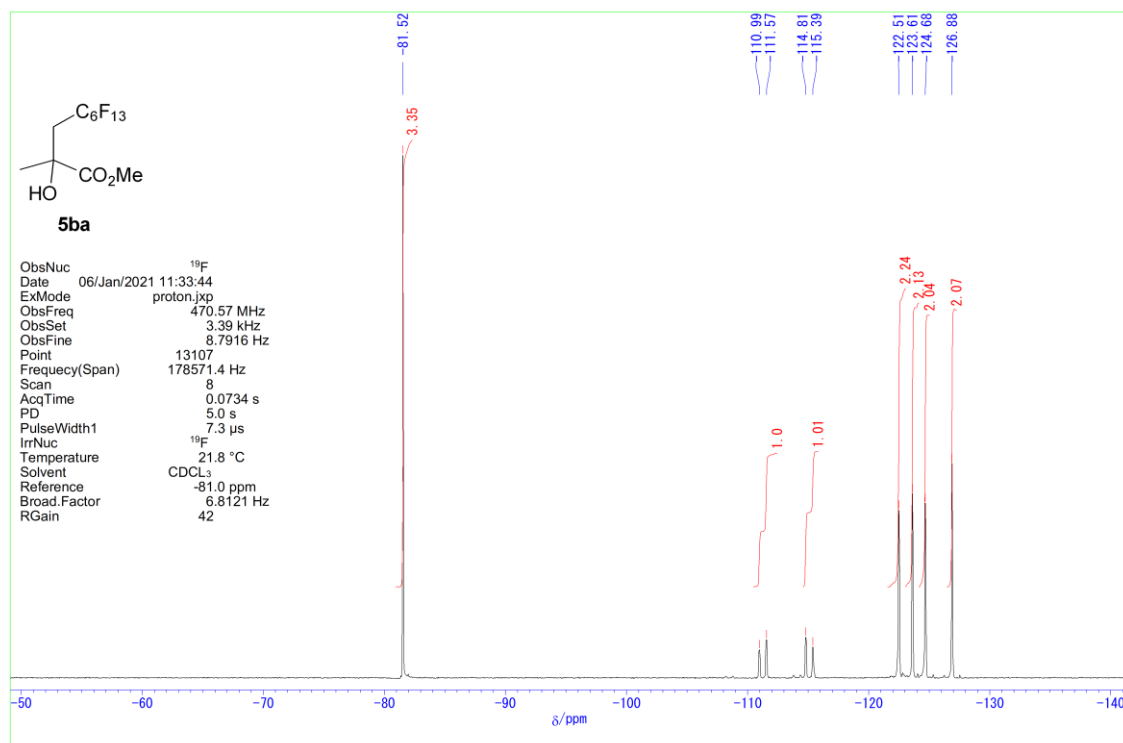

**5ca:**  $^1\text{H}$  NMR ( $\text{CDCl}_3$ , 500 MHz)

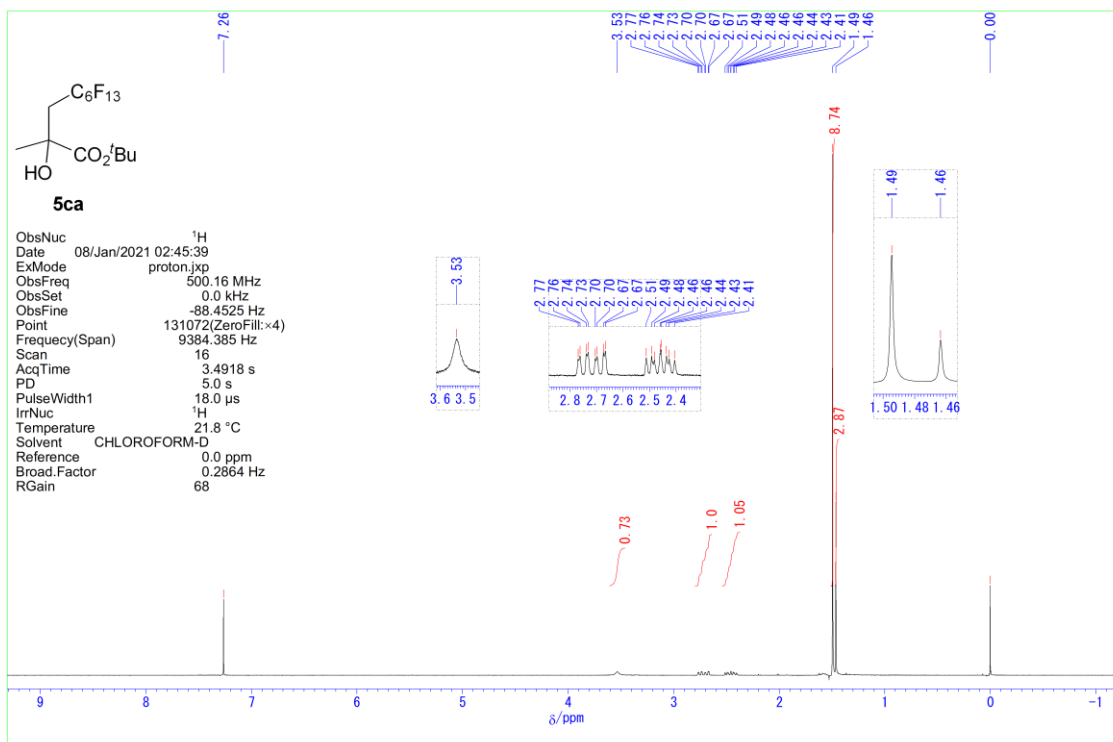

**5ca:**  $^{13}\text{C}$  NMR ( $\text{CDCl}_3$ , 151 MHz)

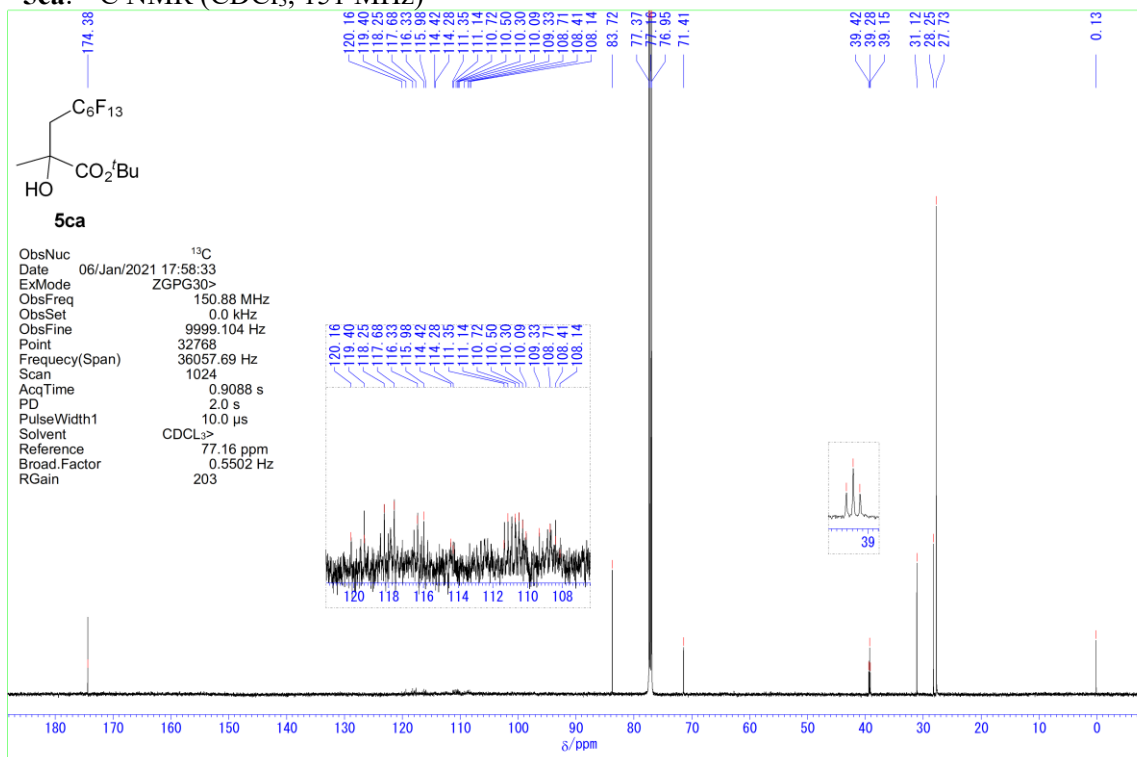

**5ca:**  $^{19}\text{F}$  NMR ( $\text{CDCl}_3$ , 471 MHz)

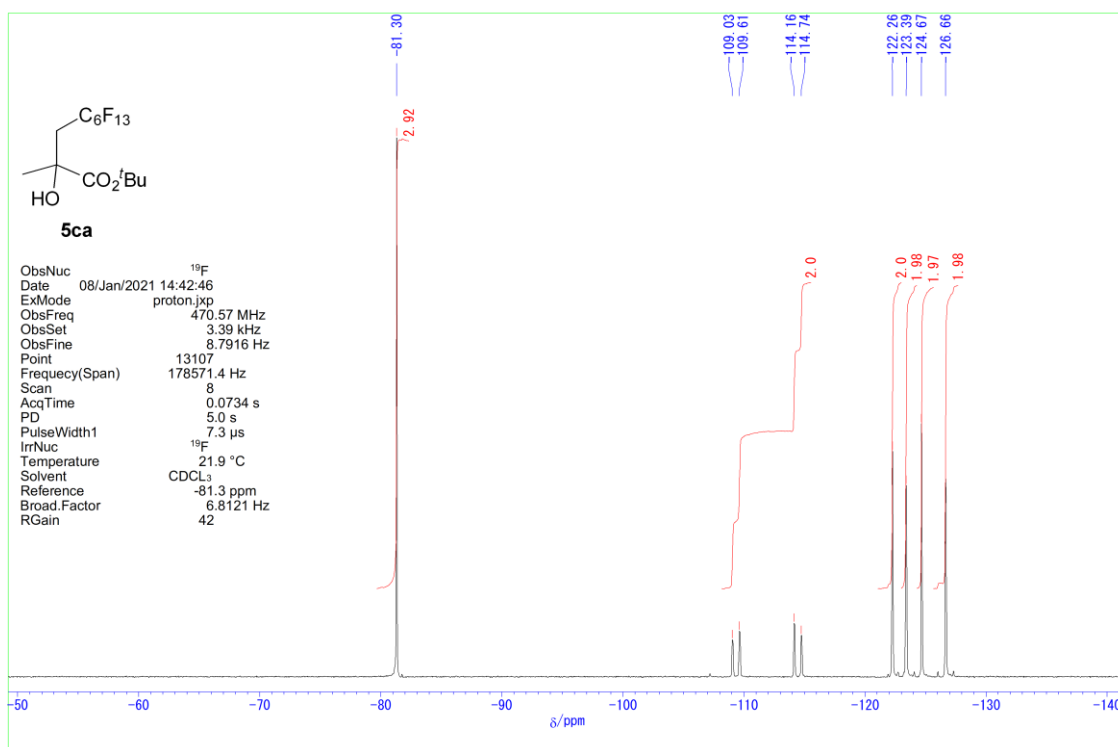

**5da:**  $^1\text{H}$  NMR ( $\text{CDCl}_3$ , 500 MHz)

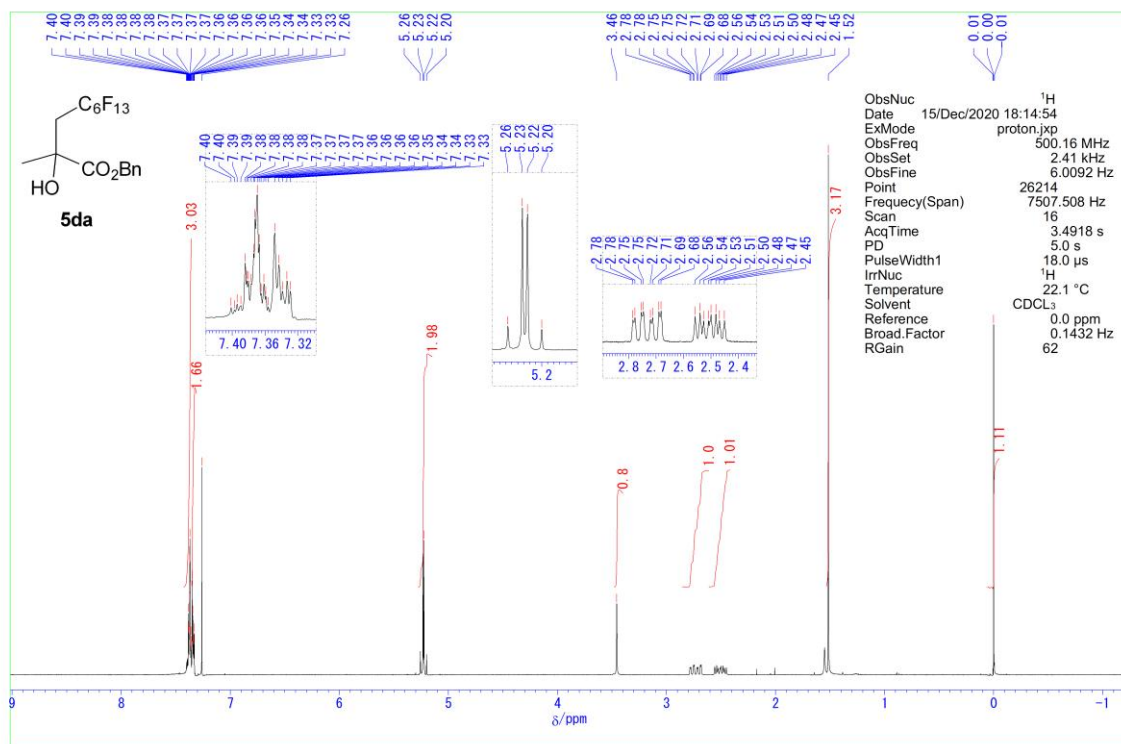

**5da:**  $^{13}\text{C}$  NMR ( $\text{CDCl}_3$ , 151 MHz)

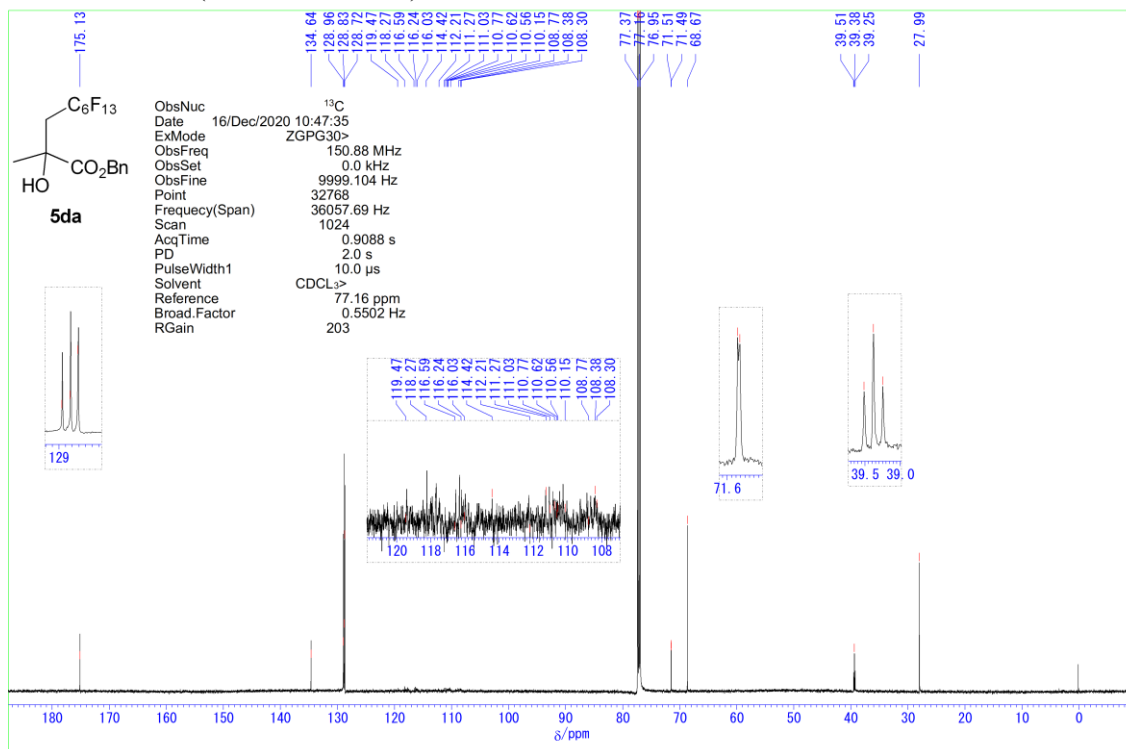

**5da:**  $^{19}\text{F}$  NMR ( $\text{CDCl}_3$ , 471 MHz)

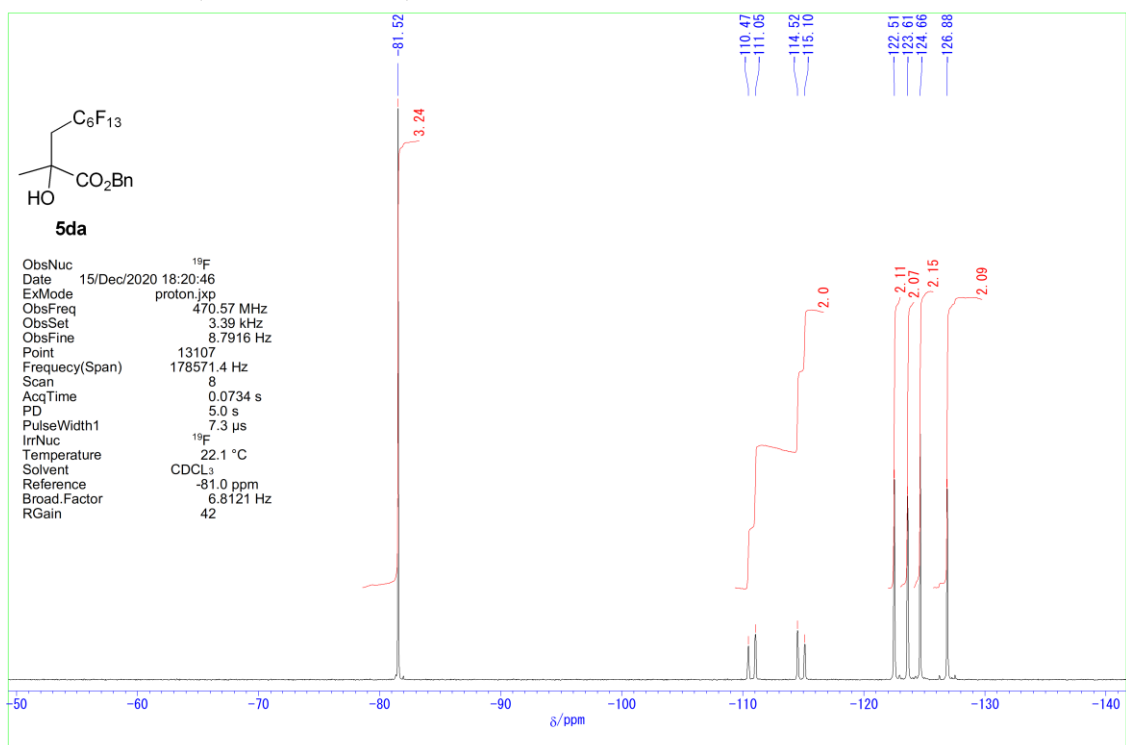

**5ea:**  $^1\text{H}$  NMR ( $\text{CDCl}_3$ , 400 MHz)

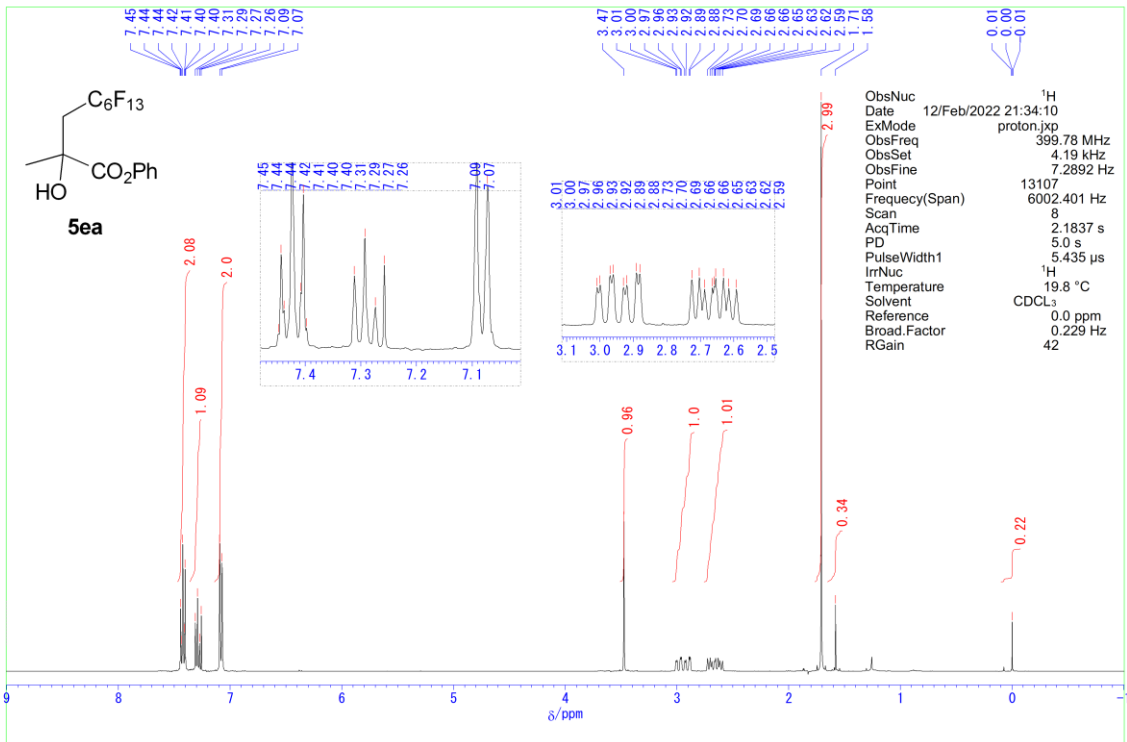

**5ea:**  $^{13}\text{C}$  NMR ( $\text{CDCl}_3$ , 151 MHz)

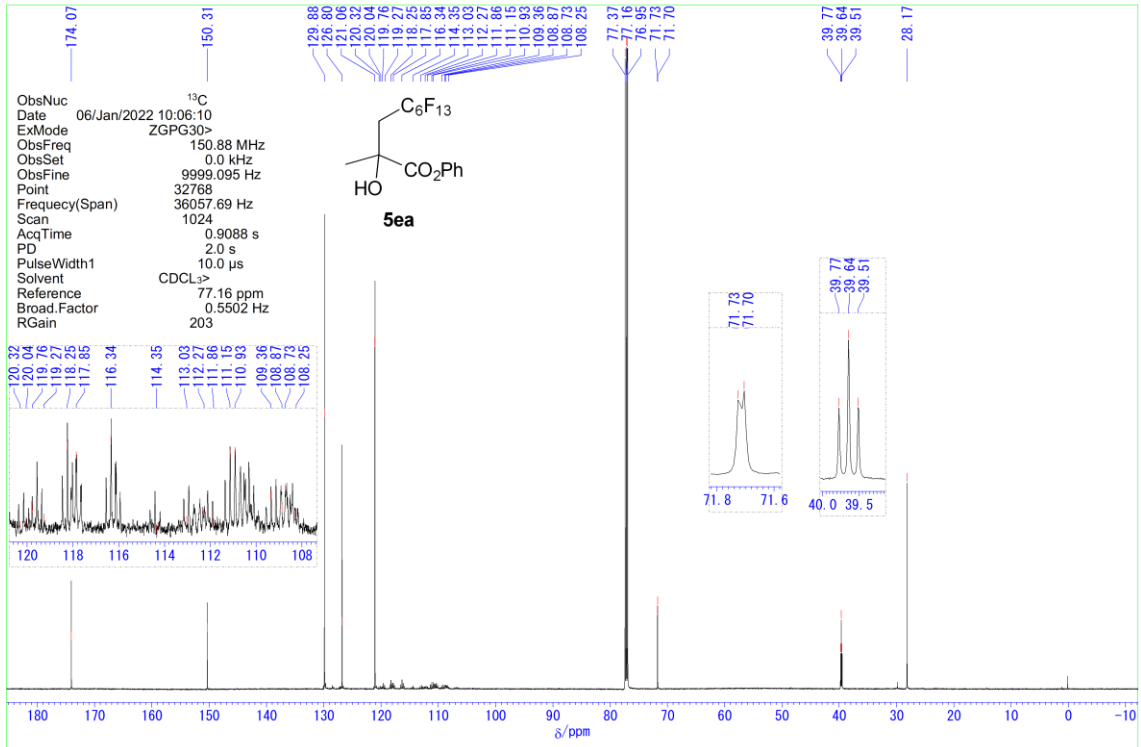



**5a:**  $^{19}\text{F}$  NMR ( $\text{CDCl}_3$ , 376 MHz)

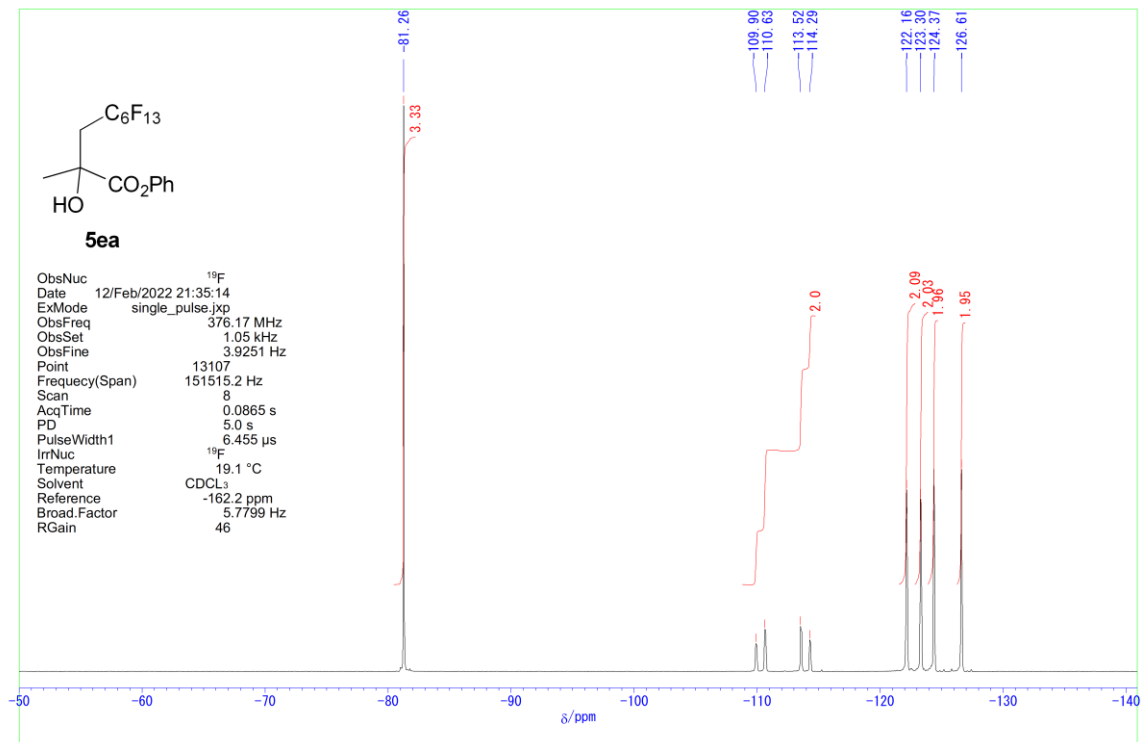

**5fa:**  $^1\text{H}$  NMR ( $\text{CDCl}_3$ , 500 MHz)

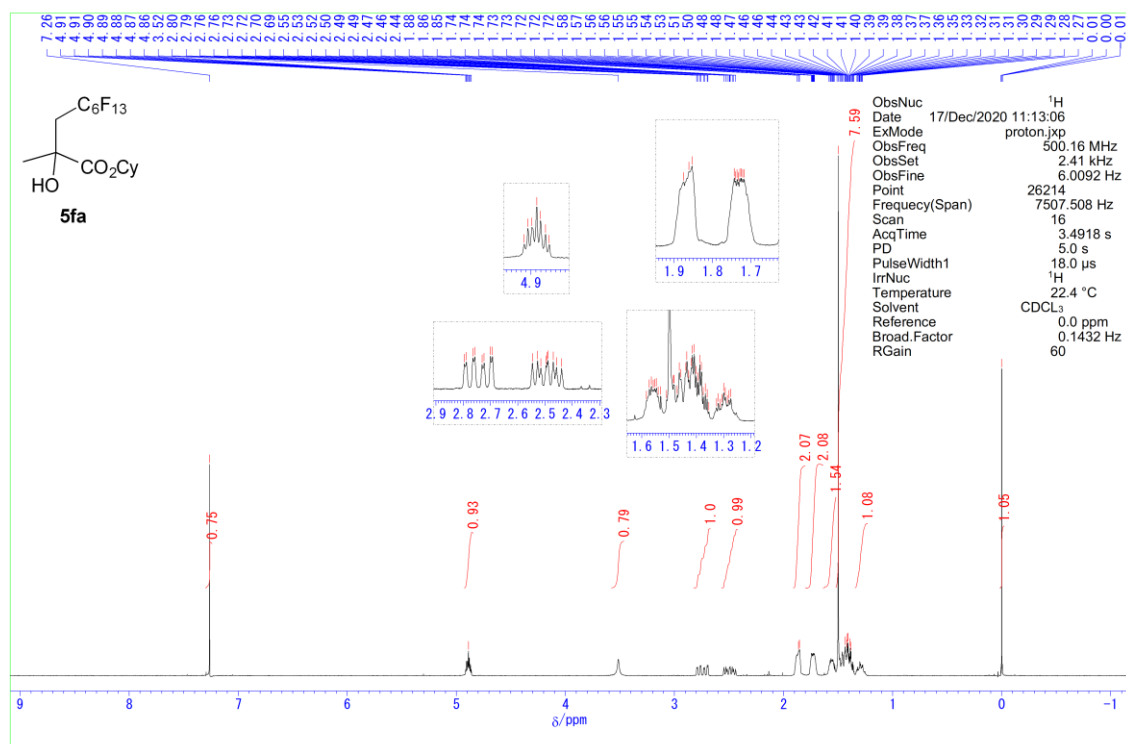

**5fa:**  $^{13}\text{C}$  NMR ( $\text{CDCl}_3$ , 151 MHz)

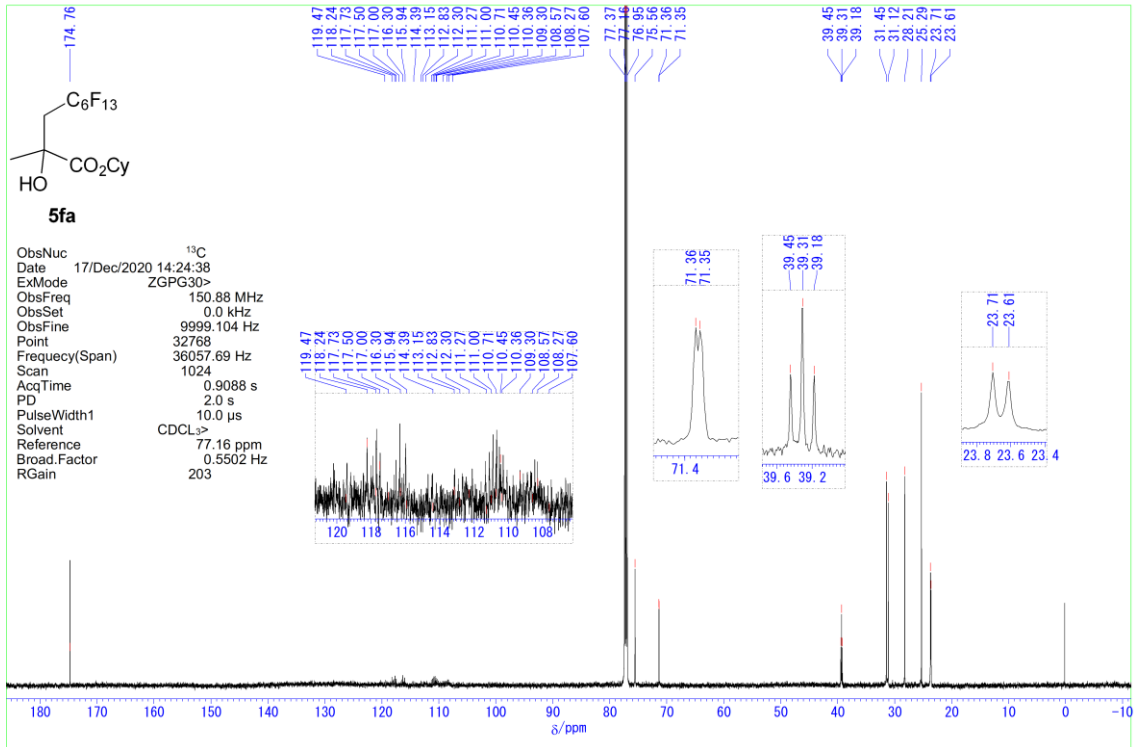

**5fa:**  $^{19}\text{F}$  NMR ( $\text{CDCl}_3$ , 471 MHz)

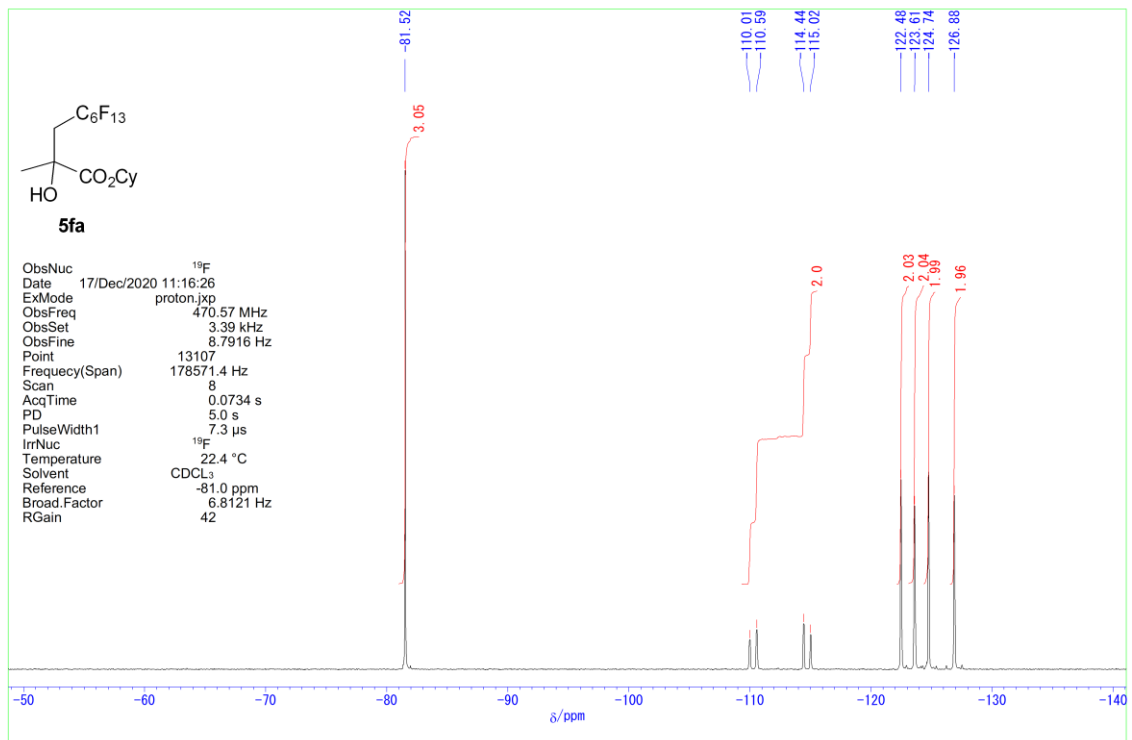

**5ga:**  $^1\text{H}$  NMR ( $\text{CDCl}_3$ , 400 MHz)

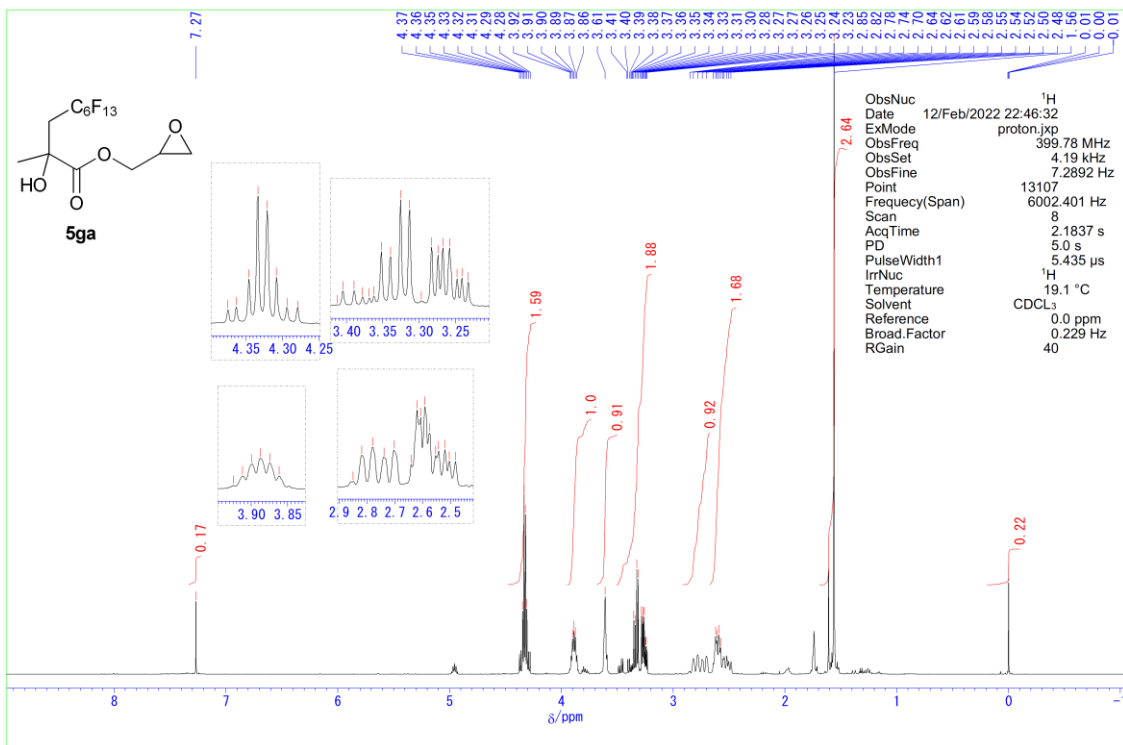

**5ga:**  $^{13}\text{C}$  NMR ( $\text{CDCl}_3$ , 151 MHz)

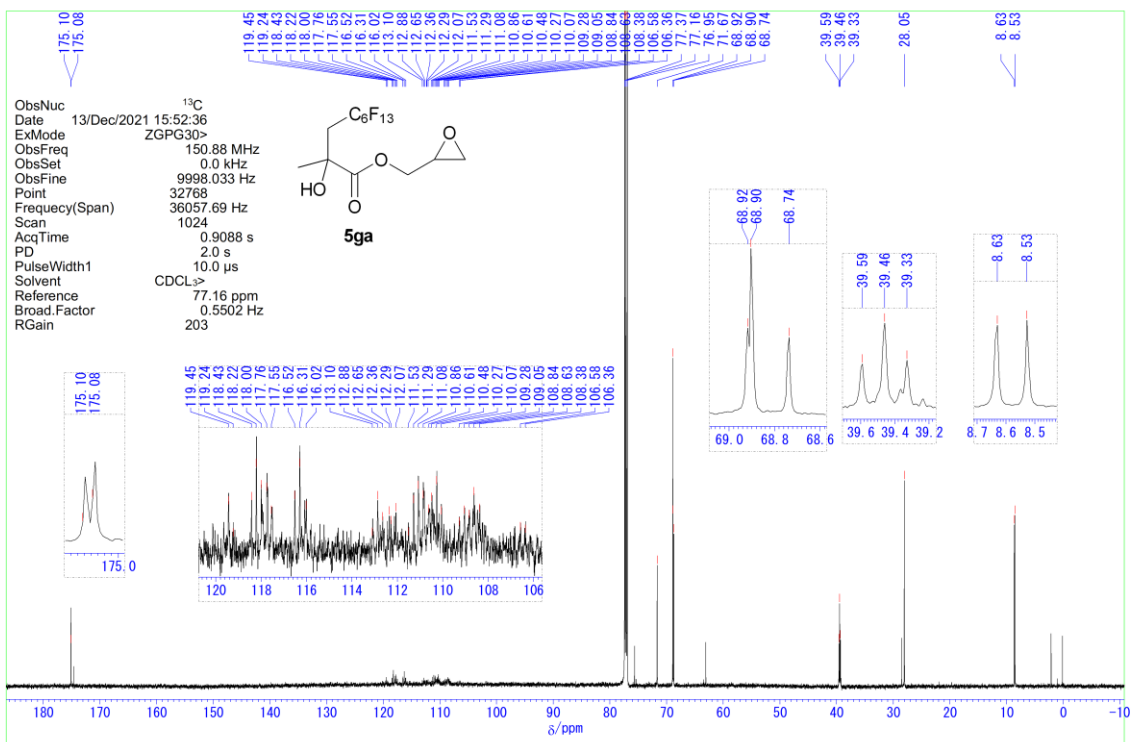

**5ga:**  $^{19}\text{F}$  NMR ( $\text{CDCl}_3$ , 376 MHz)

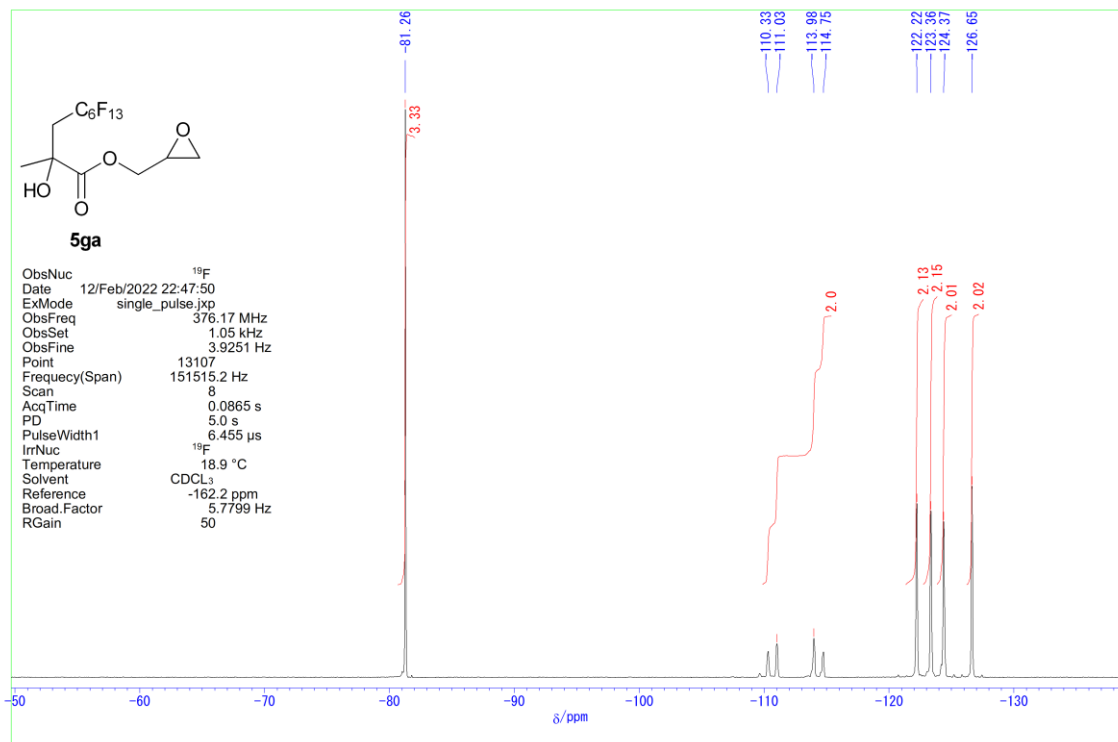

**5ha:**  $^1\text{H}$  NMR ( $\text{CDCl}_3$ , 400 MHz)

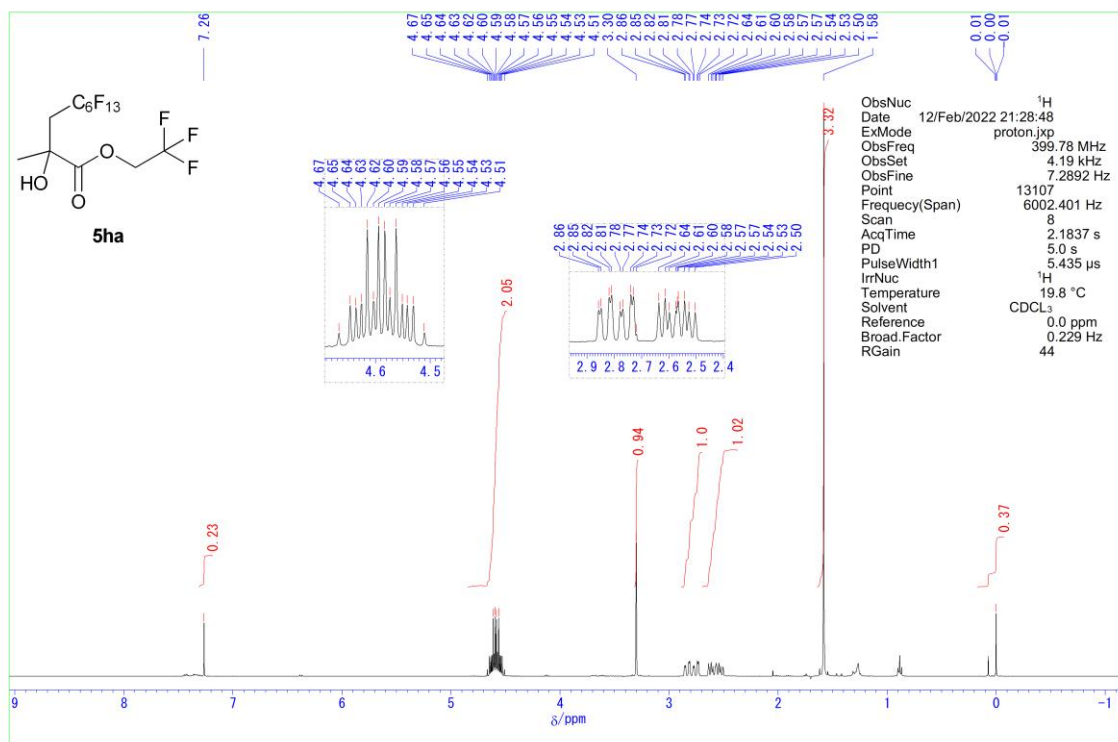

**5ha:**  $^{13}\text{C}$  NMR ( $\text{CDCl}_3$ , 151 MHz)

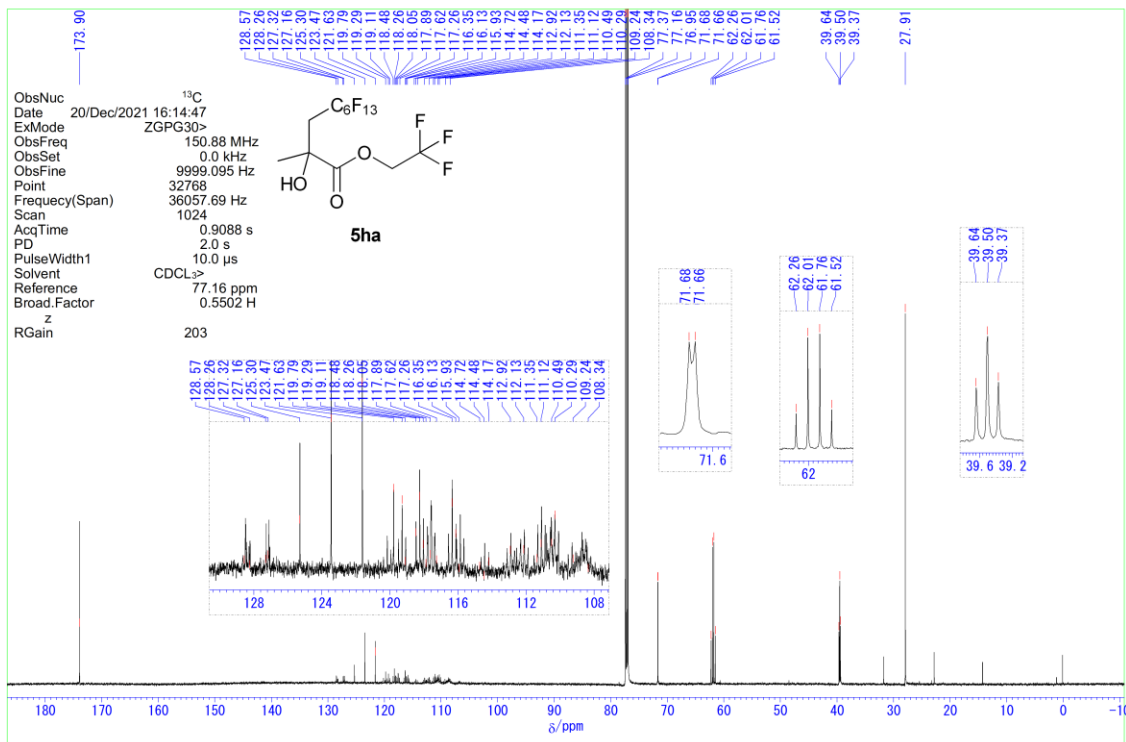

**5ha:**  $^{19}\text{F}$  NMR ( $\text{CDCl}_3$ , 376 MHz)

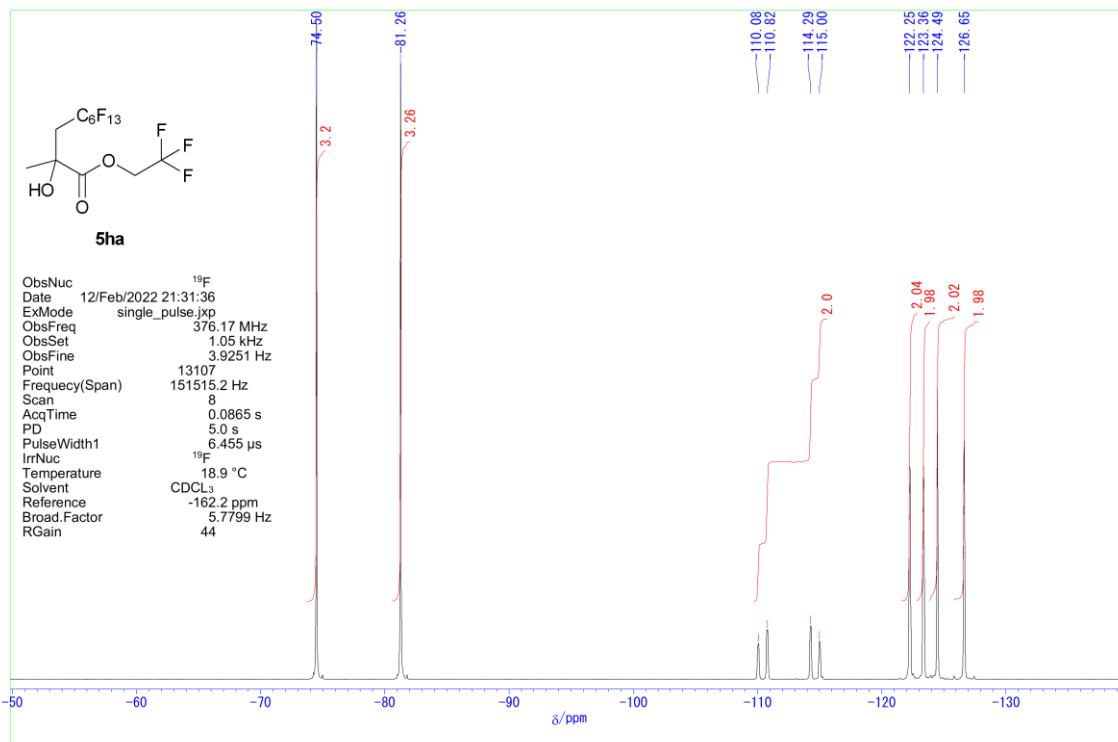

**5ia:**  $^1\text{H}$  NMR ( $\text{CDCl}_3$ , 400 MHz)

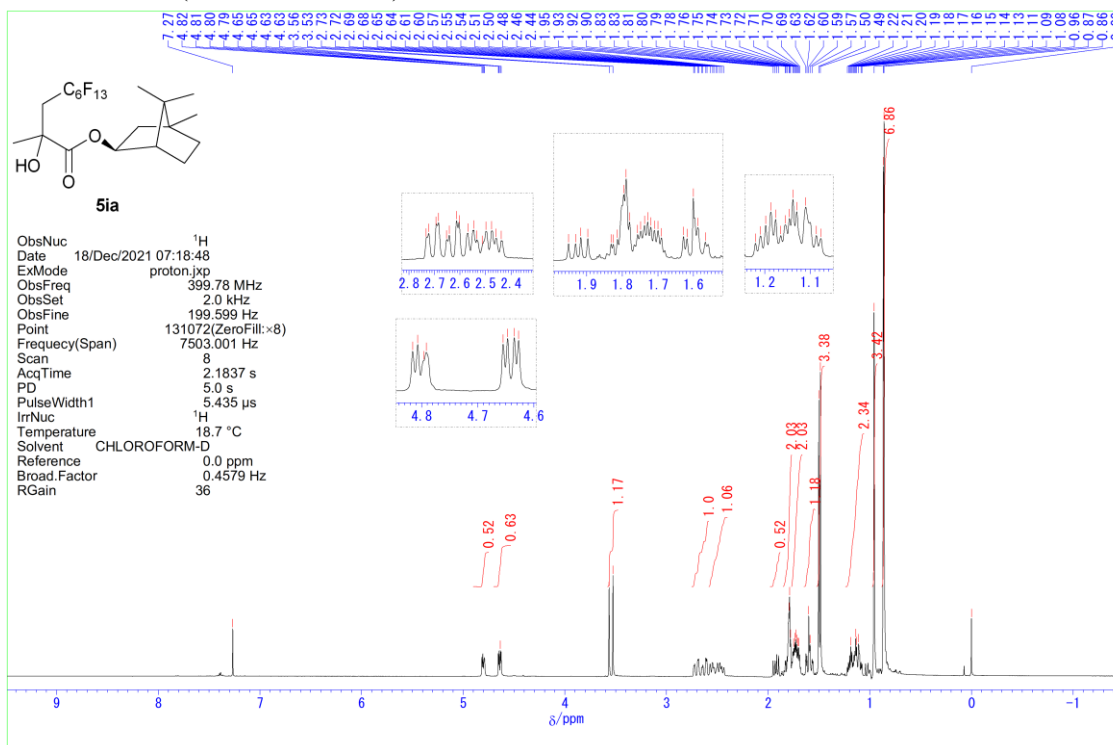

**5ia:**  $^{13}\text{C}$  NMR ( $\text{CDCl}_3$ , 151 MHz)

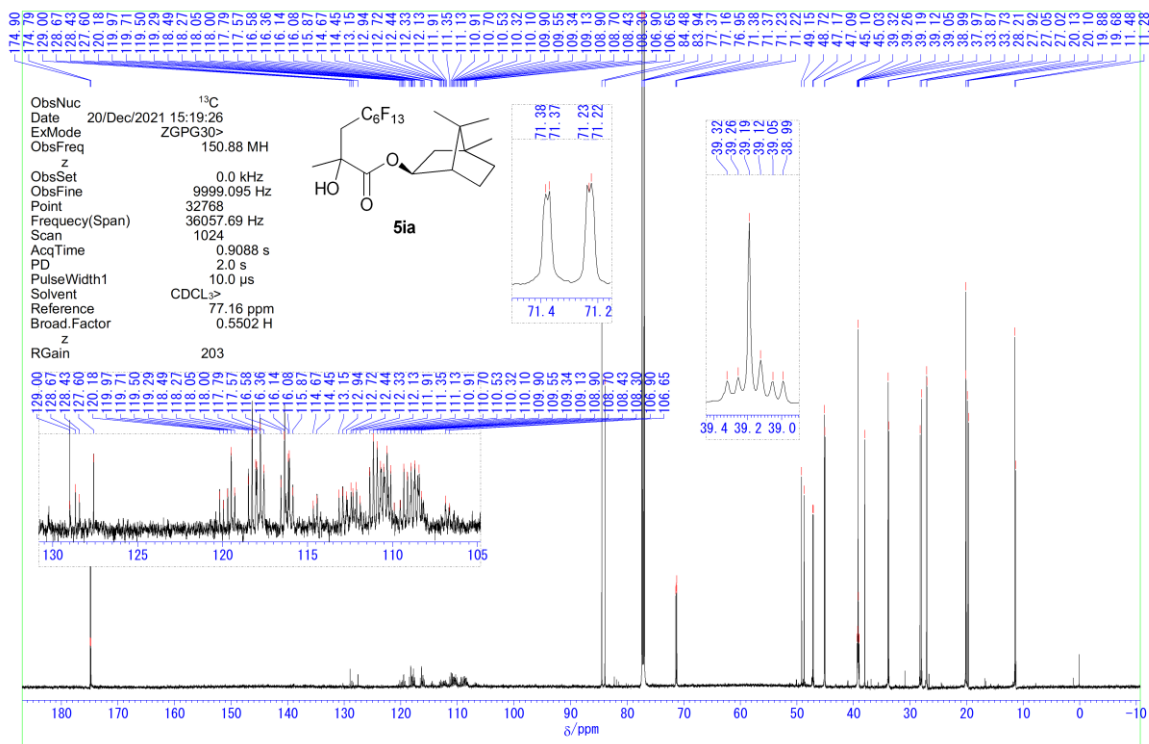

**5ia:**  $^{19}\text{F}$  NMR ( $\text{CDCl}_3$ , 376 MHz)

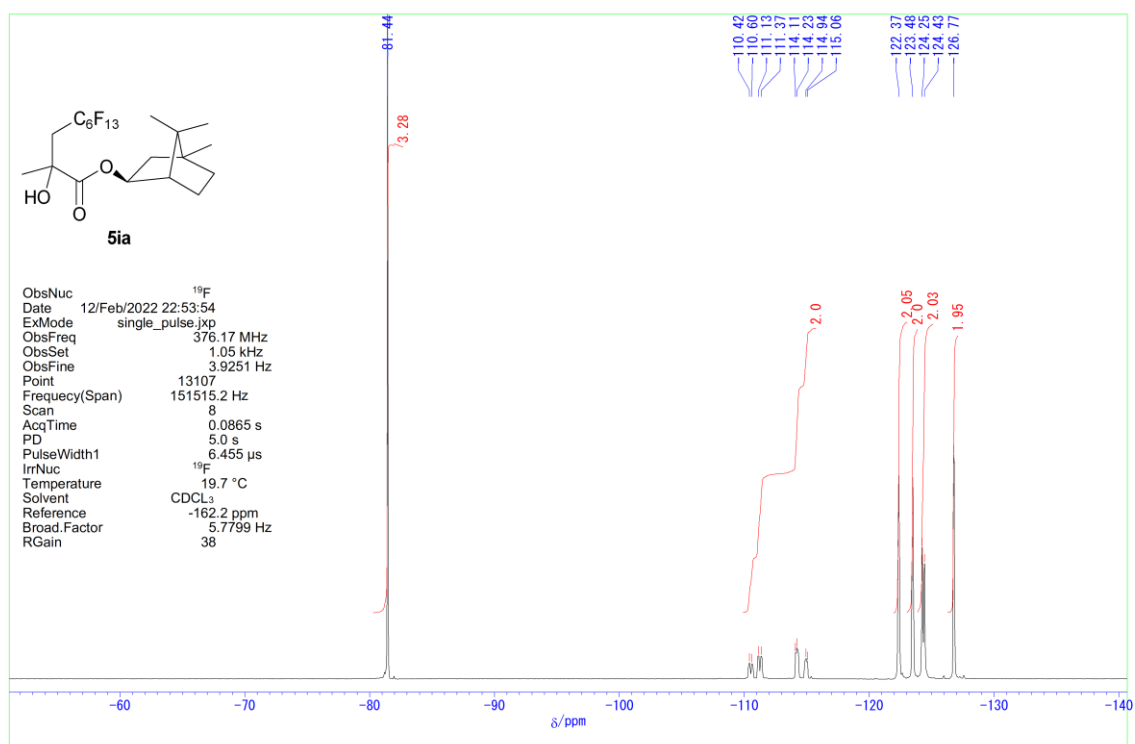

**5ja:**  $^1\text{H}$  NMR ( $\text{CDCl}_3$ , 400 MHz)

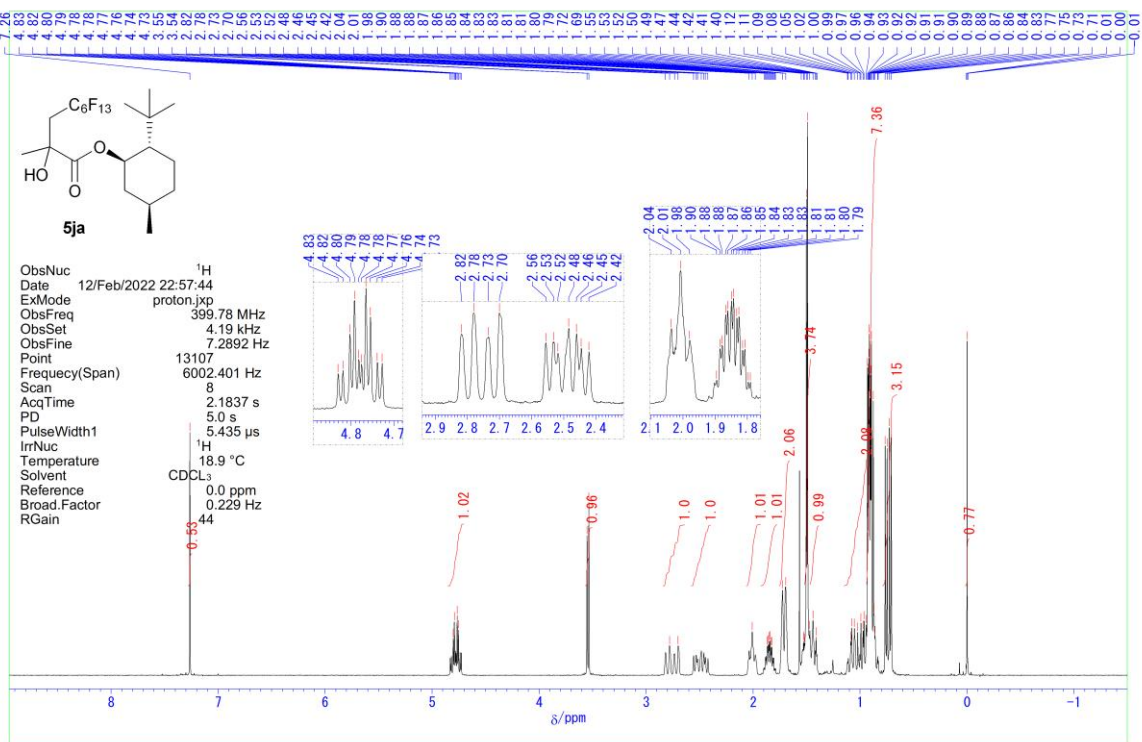

**5ja:**  $^{13}\text{C}$  NMR ( $\text{CDCl}_3$ , 151 MHz)

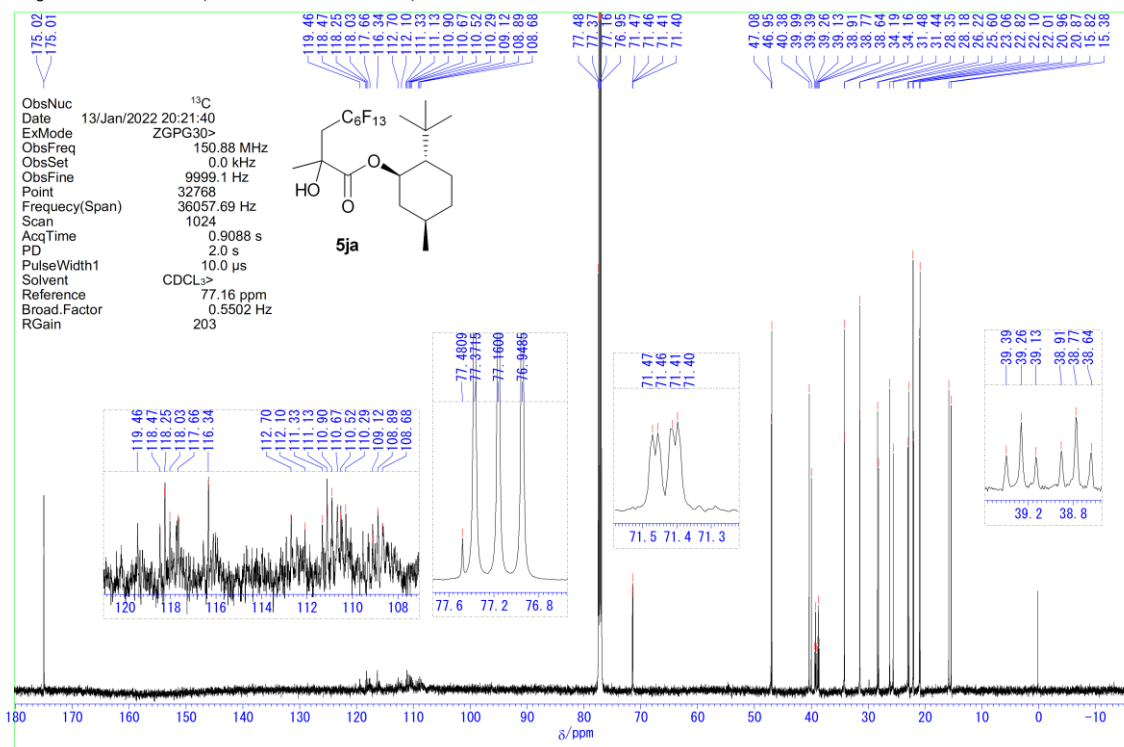

**5ja:**  $^{19}\text{F}$  NMR ( $\text{CDCl}_3$ , 376 MHz)

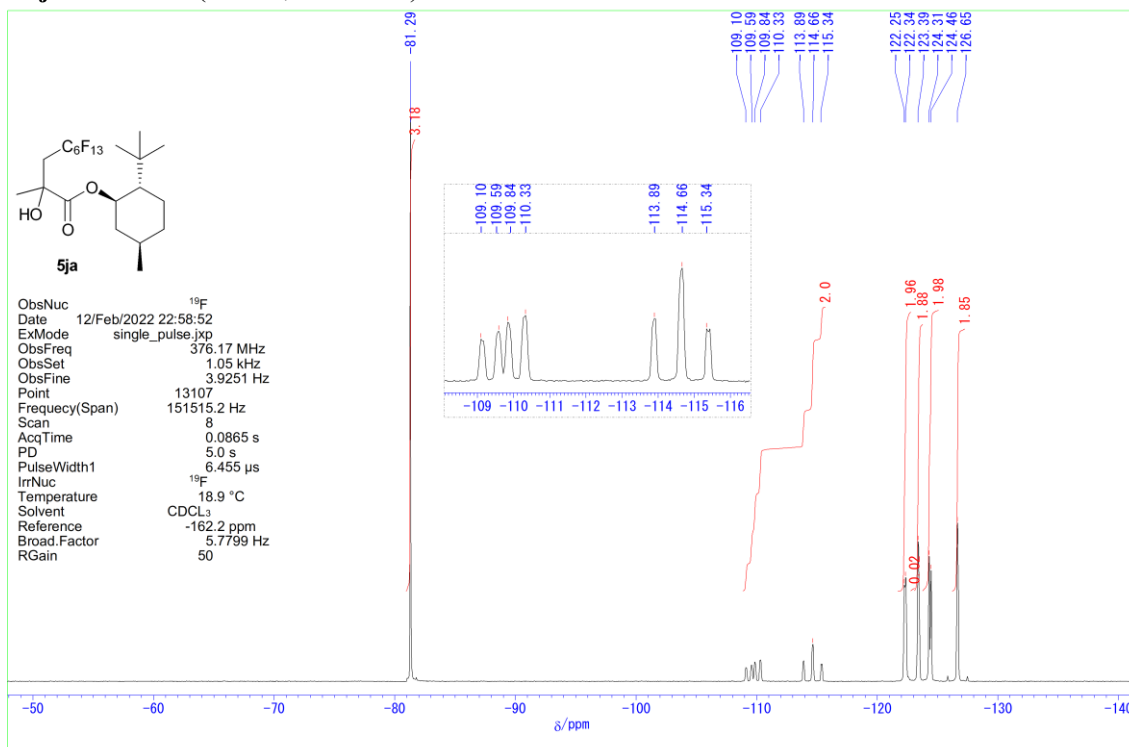



**5ka:**  $^1\text{H}$  NMR ( $\text{CDCl}_3$ , 400 MHz)

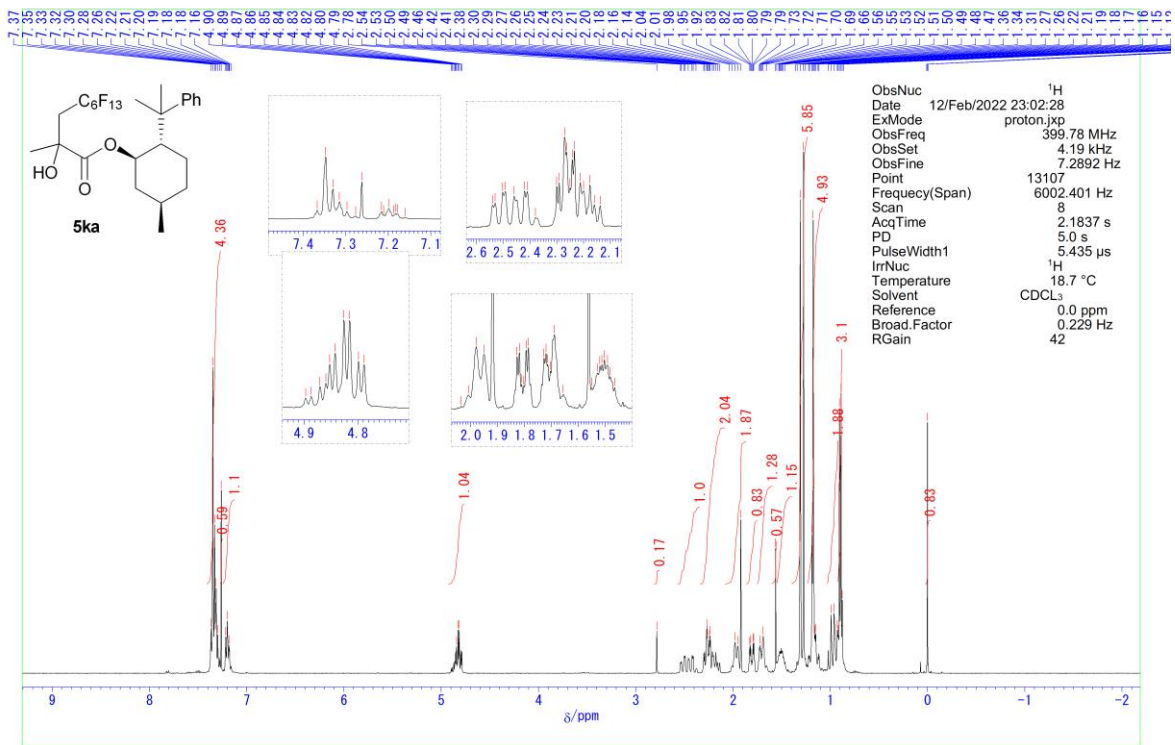

**5ka:**  $^{13}\text{C}$  NMR ( $\text{CDCl}_3$ , 151 MHz)

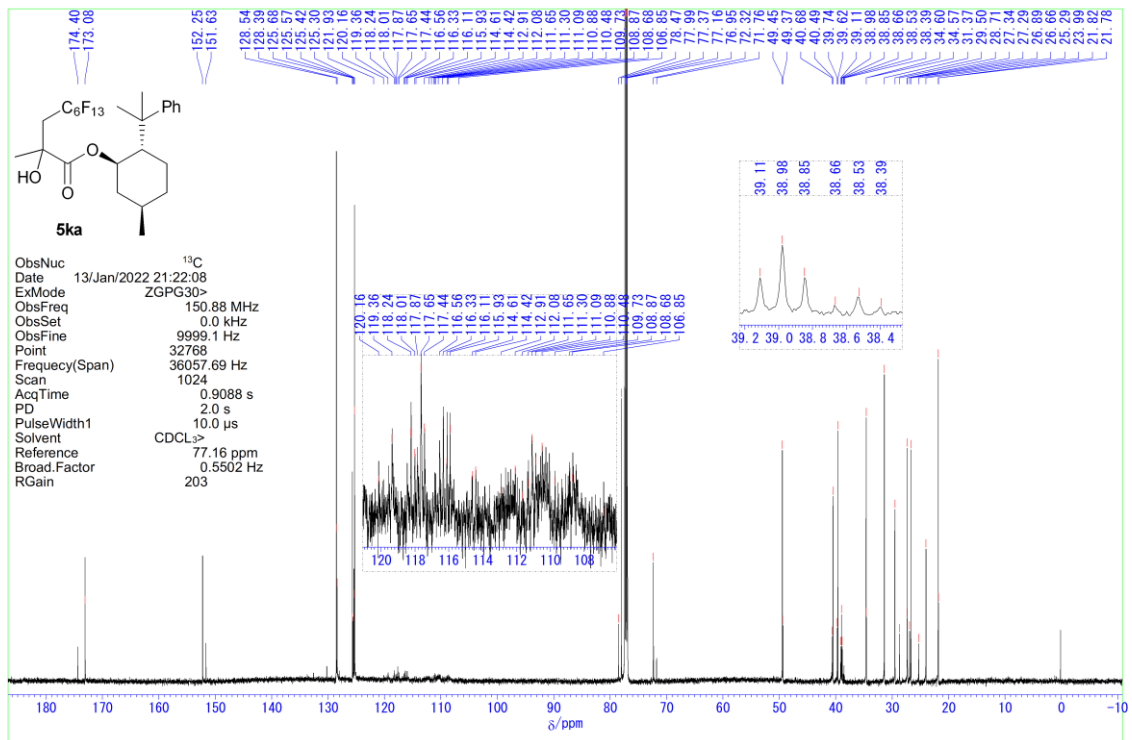

**5ka:**  $^{19}\text{F}$  NMR ( $\text{CDCl}_3$ , 376 MHz)

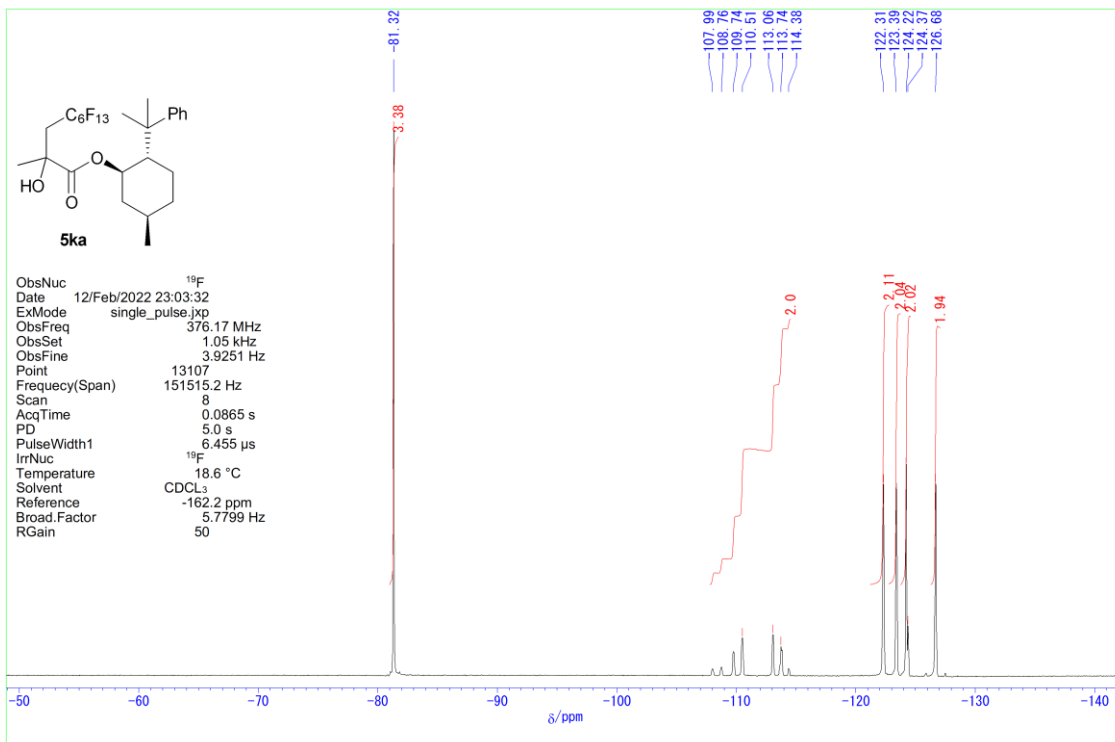

**5la:**  $^1\text{H}$  NMR ( $\text{CDCl}_3$ , 500 MHz)

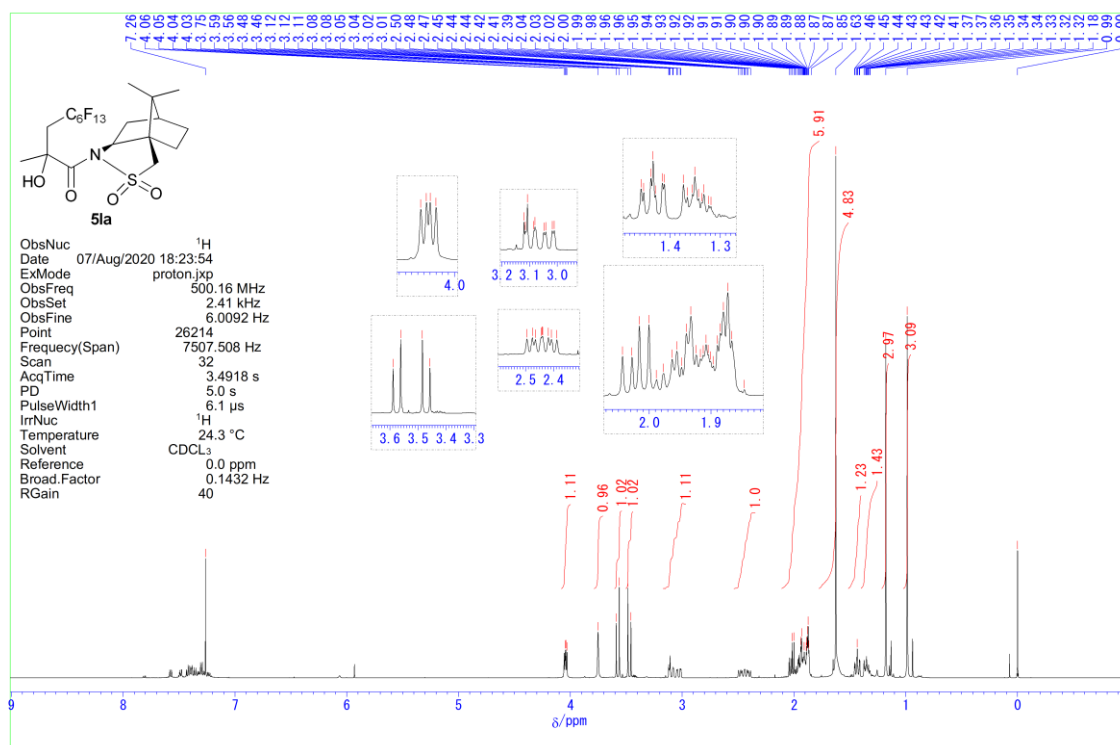

**5la:**  $^{13}\text{C}$  NMR ( $\text{CDCl}_3$ , 151 MHz)

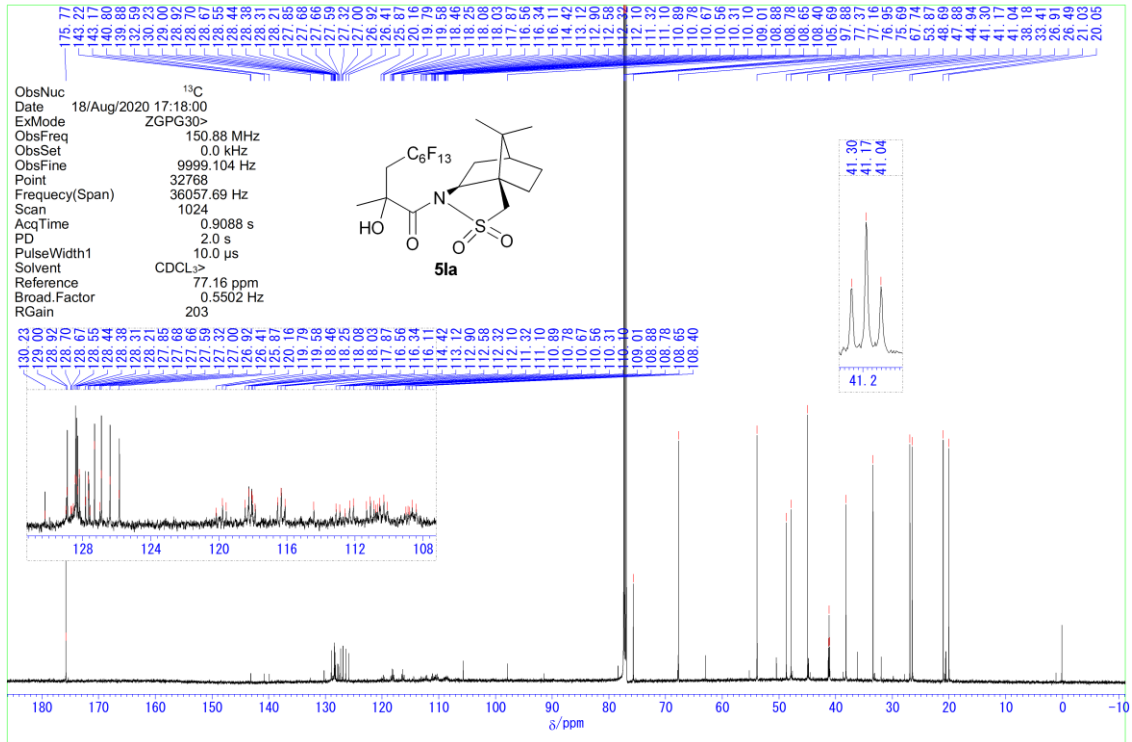

**5la:**  $^{19}\text{F}$  NMR ( $\text{CDCl}_3$ , 376 MHz)

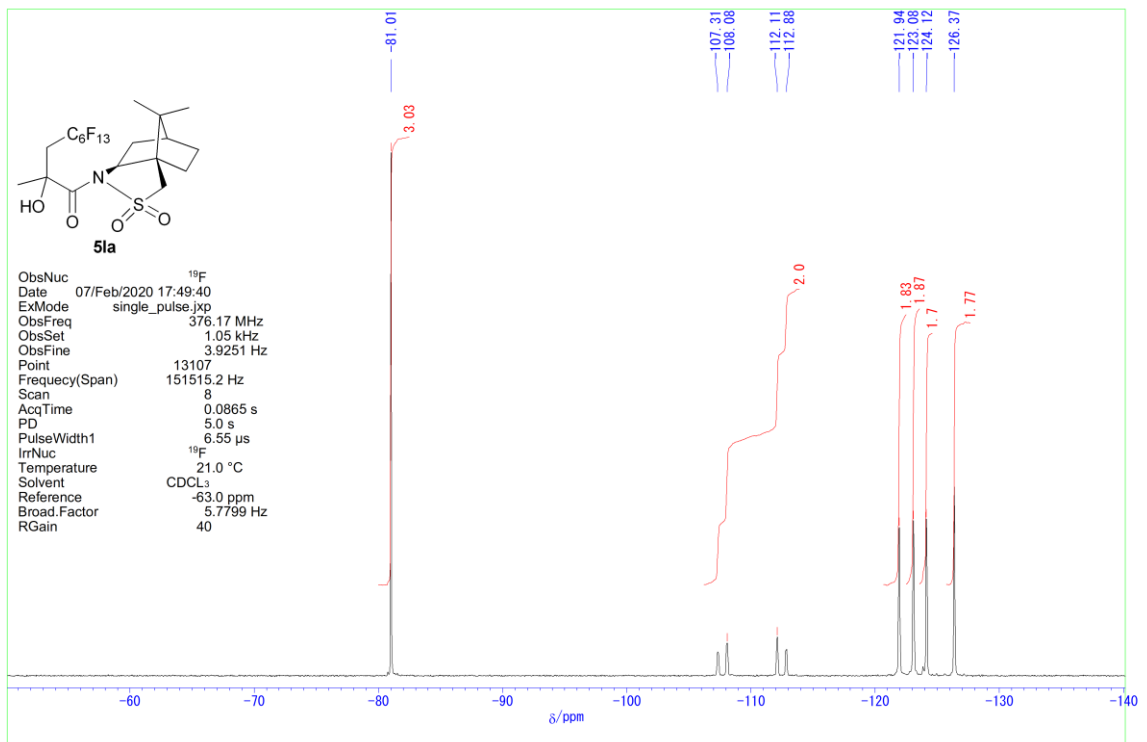

**5ma:**  $^1\text{H}$  NMR ( $\text{CDCl}_3$ , 500 MHz)

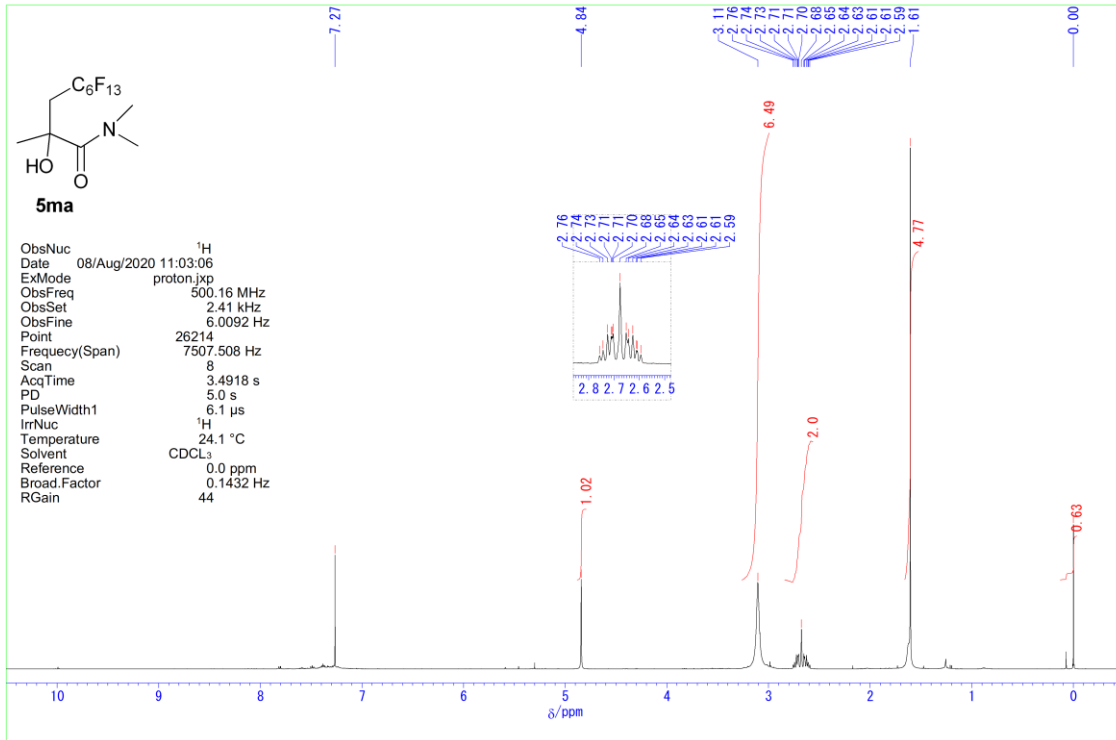

**5ma:**  $^{13}\text{C}$  NMR ( $\text{CDCl}_3$ , 151 MHz)

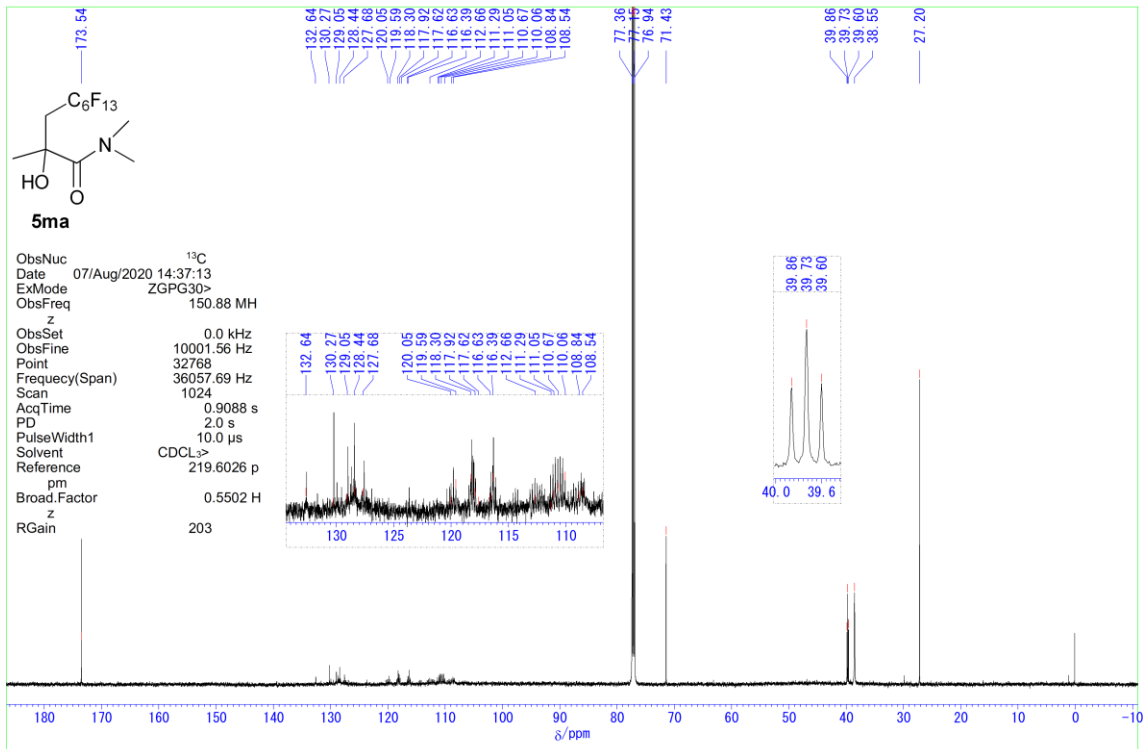

**5ma:**  $^{19}\text{F}$  NMR ( $\text{CDCl}_3$ , 471 MHz)

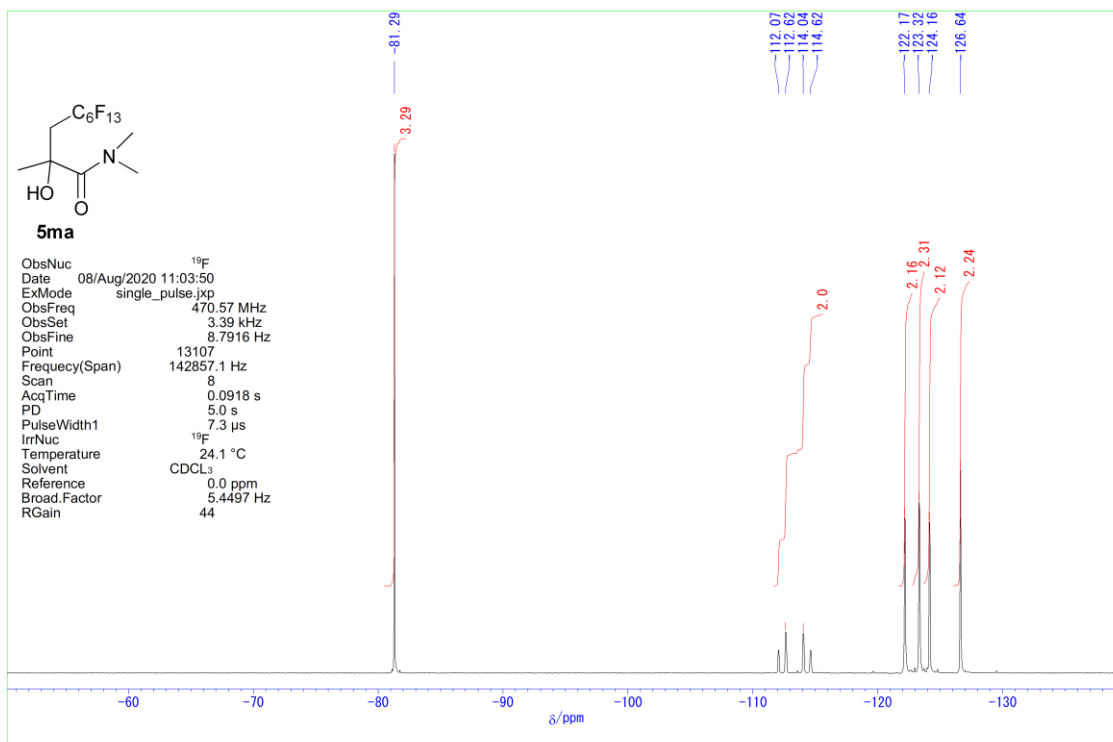

**5na:**  $^1\text{H}$  NMR ( $\text{CDCl}_3$ , 400 MHz)

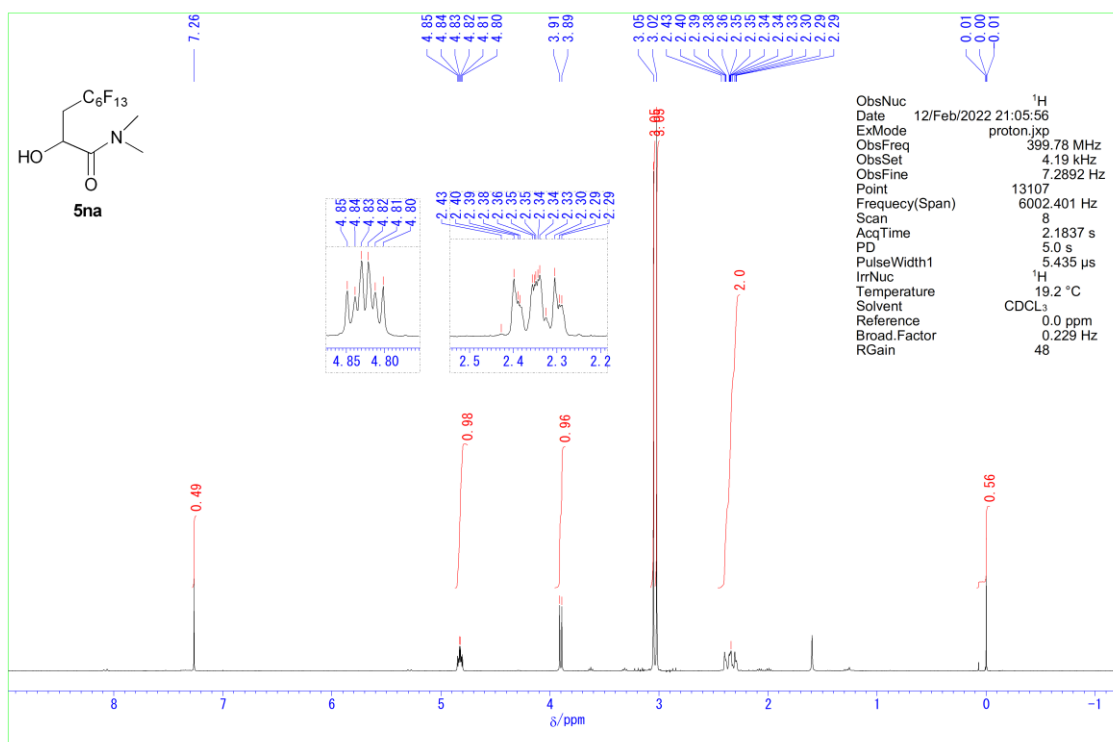

**5na:**  $^{13}\text{C}$  NMR ( $\text{CDCl}_3$ , 151 MHz)

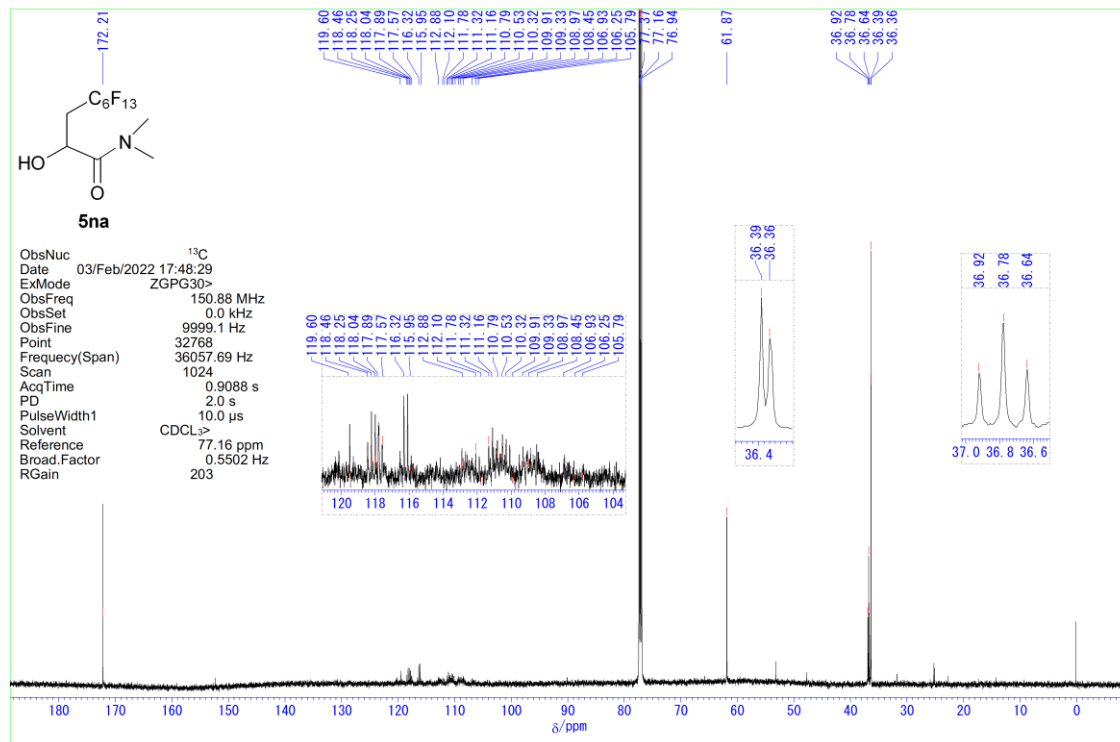

**5na:**  $^{19}\text{F}$  NMR ( $\text{CDCl}_3$ , 376 MHz)

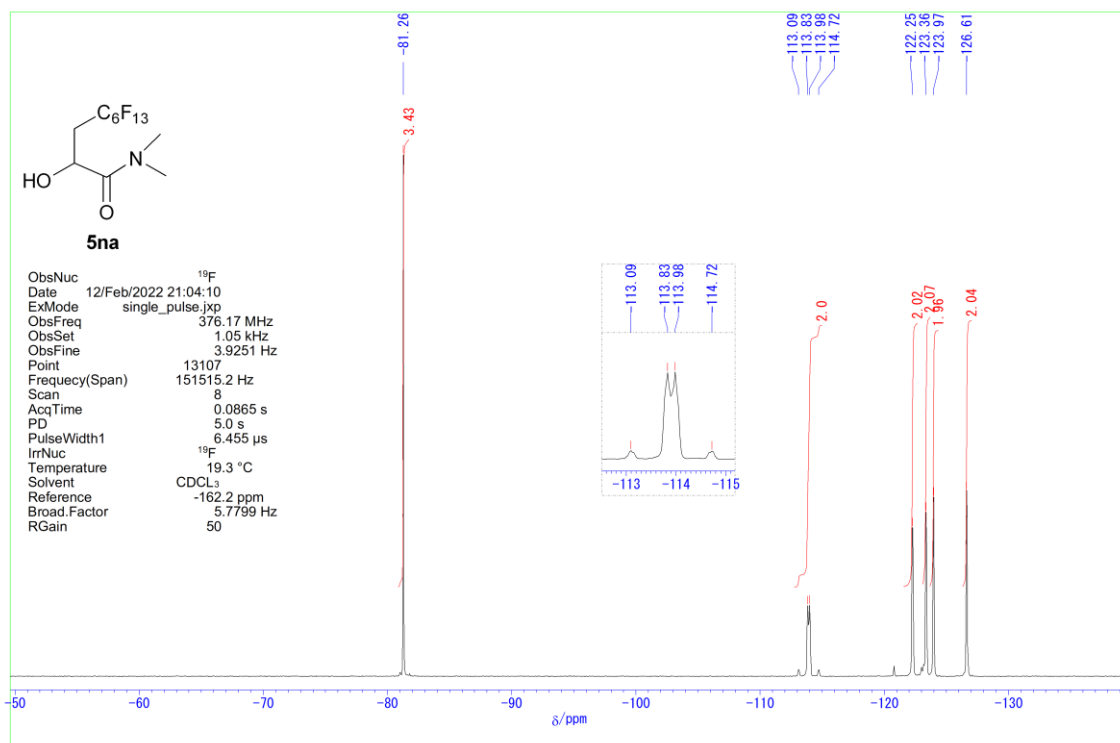

**50a:**  $^1\text{H}$  NMR ( $\text{CDCl}_3$ , 400 MHz)

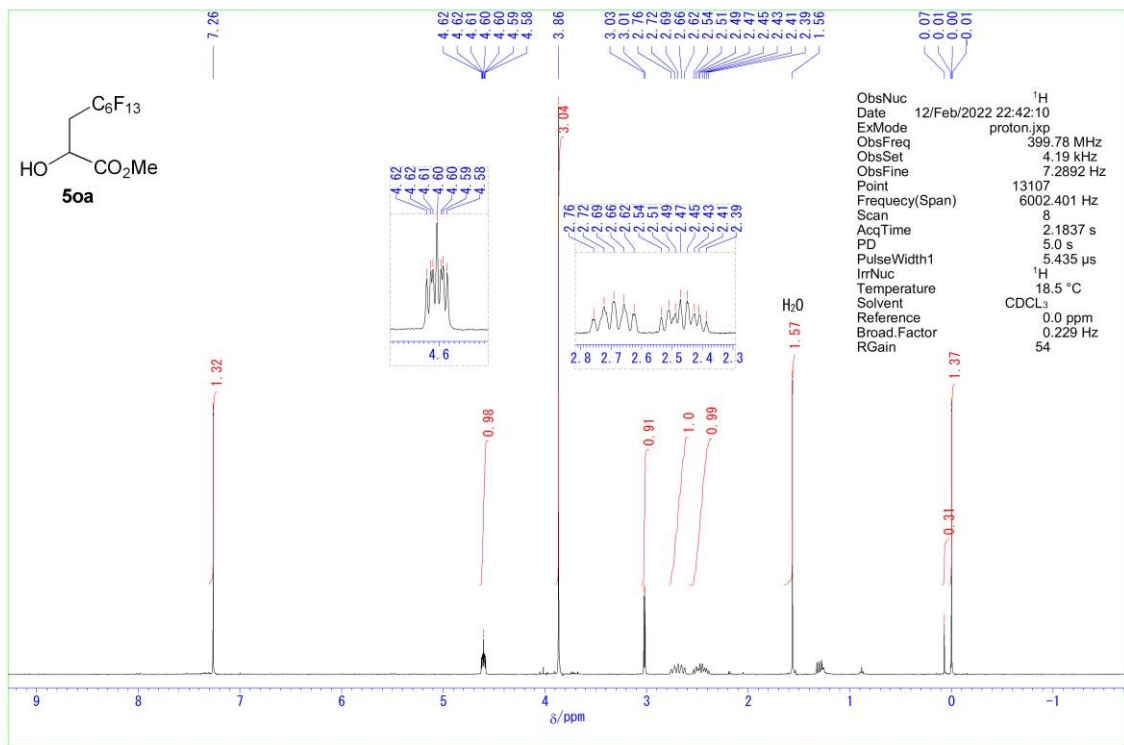

**50a:**  $^{13}\text{C}$  NMR ( $\text{CDCl}_3$ , 151 MHz)

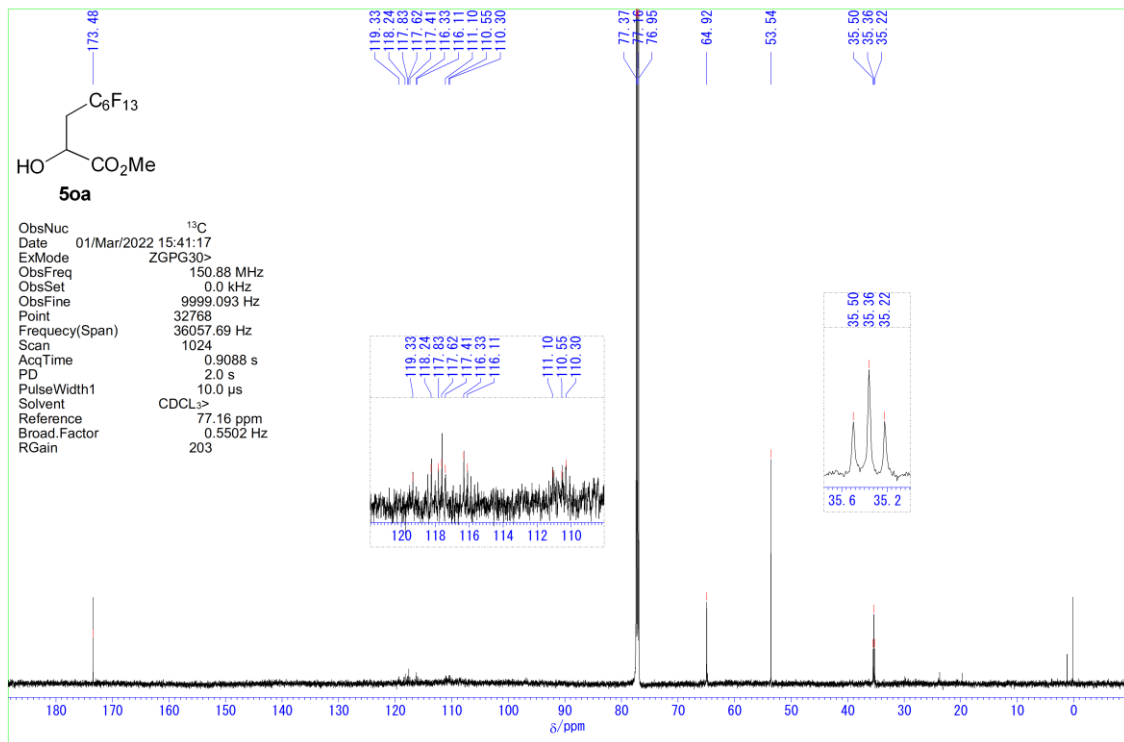

**50a:**  $^{19}\text{F}$  NMR ( $\text{CDCl}_3$ , 376 MHz)

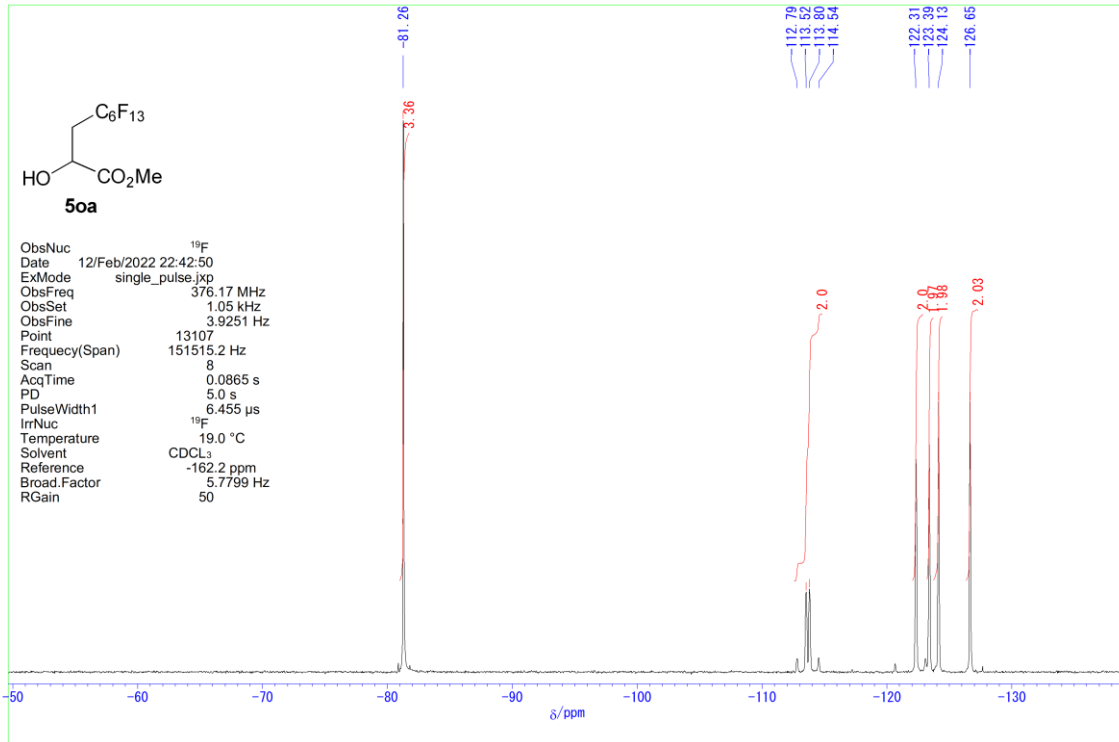

**5pa:**  $^1\text{H}$  NMR ( $\text{CDCl}_3$ , 400 MHz)

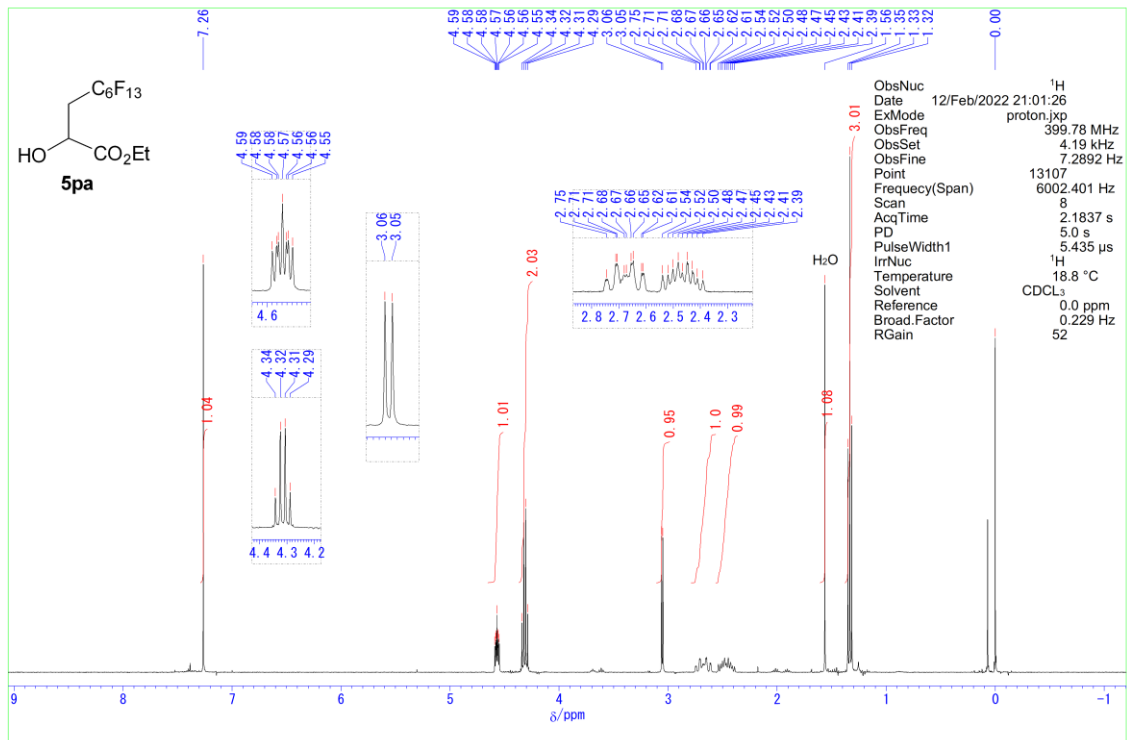



**5pa:**  $^{13}\text{C}$  NMR ( $\text{CDCl}_3$ , 151 MHz)

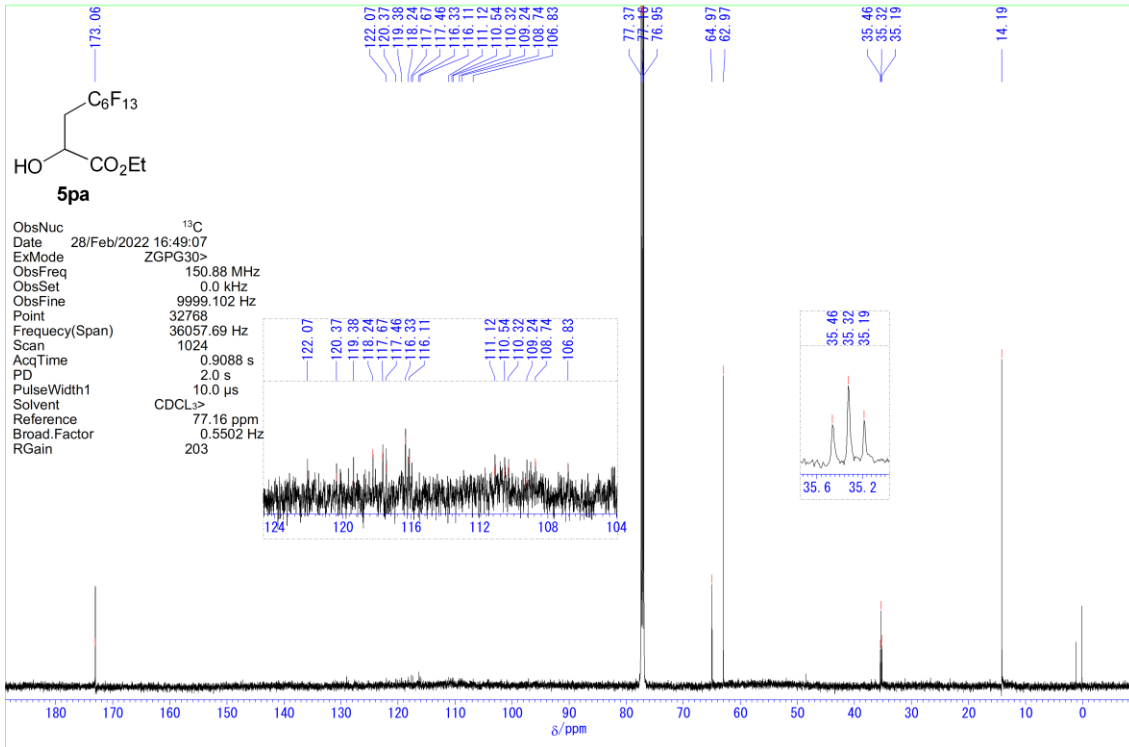

**5pa:**  $^{19}\text{F}$  NMR ( $\text{CDCl}_3$ , 376 MHz)

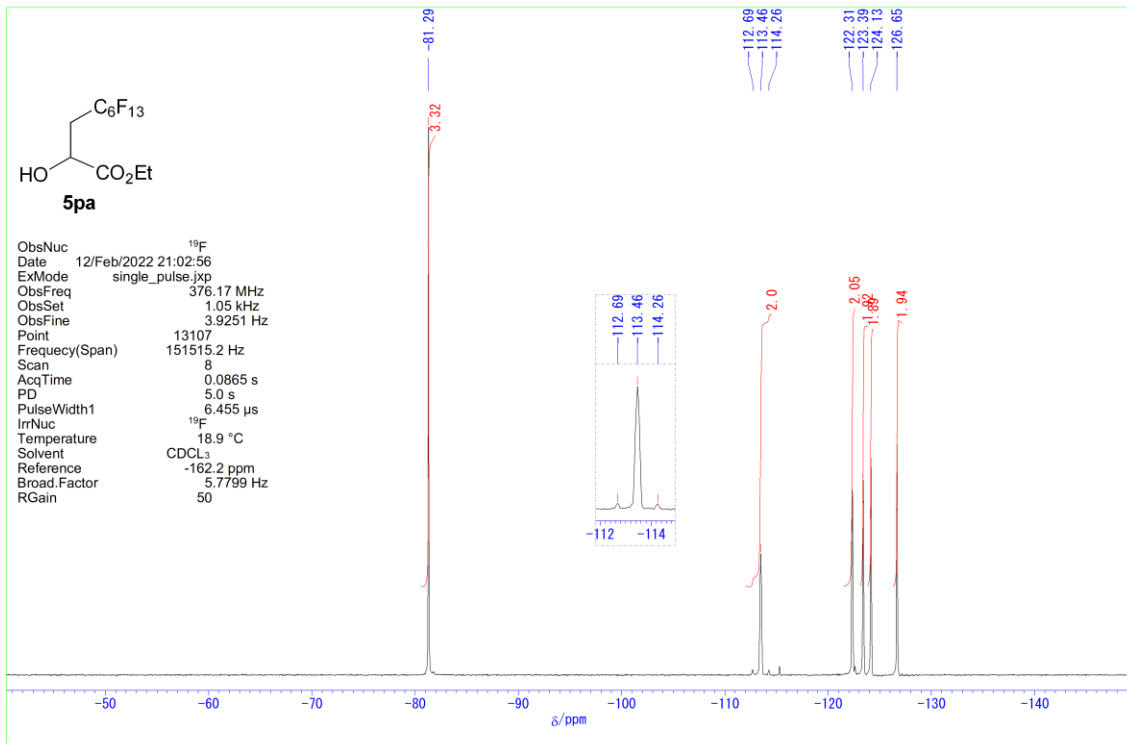

**5qa:**  $^1\text{H}$  NMR ( $\text{CDCl}_3$ , 400 MHz)

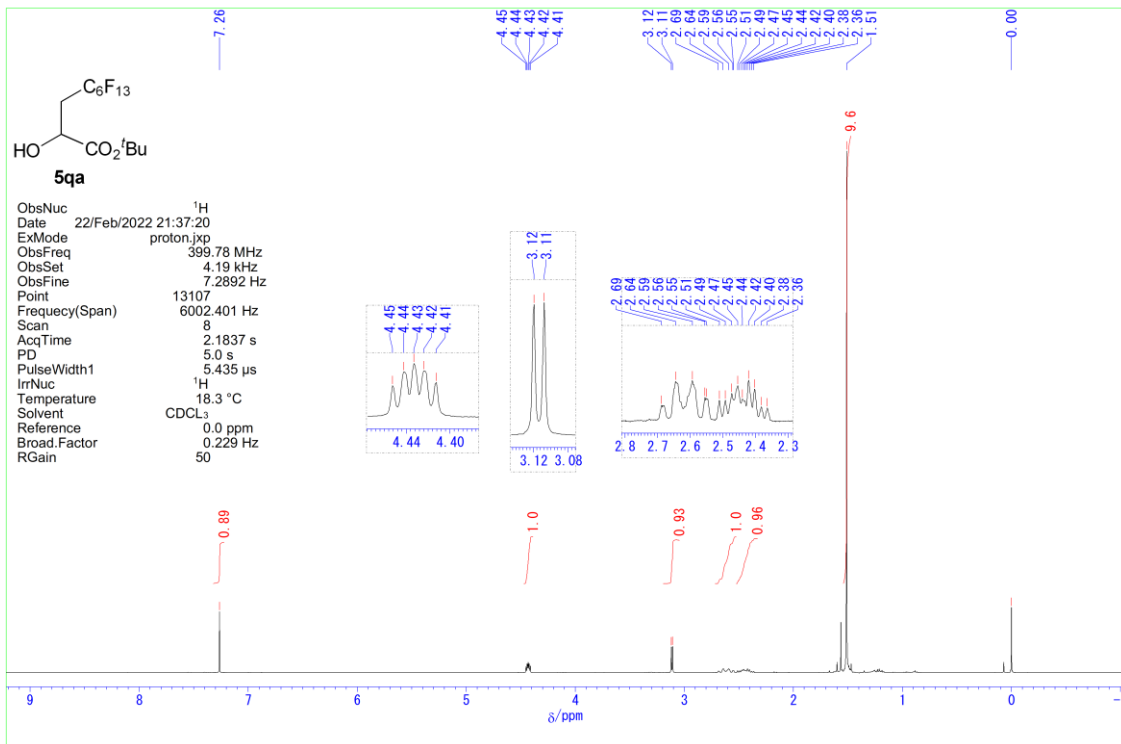

**5qa:**  $^{13}\text{C}$  NMR ( $\text{CDCl}_3$ , 151 MHz)

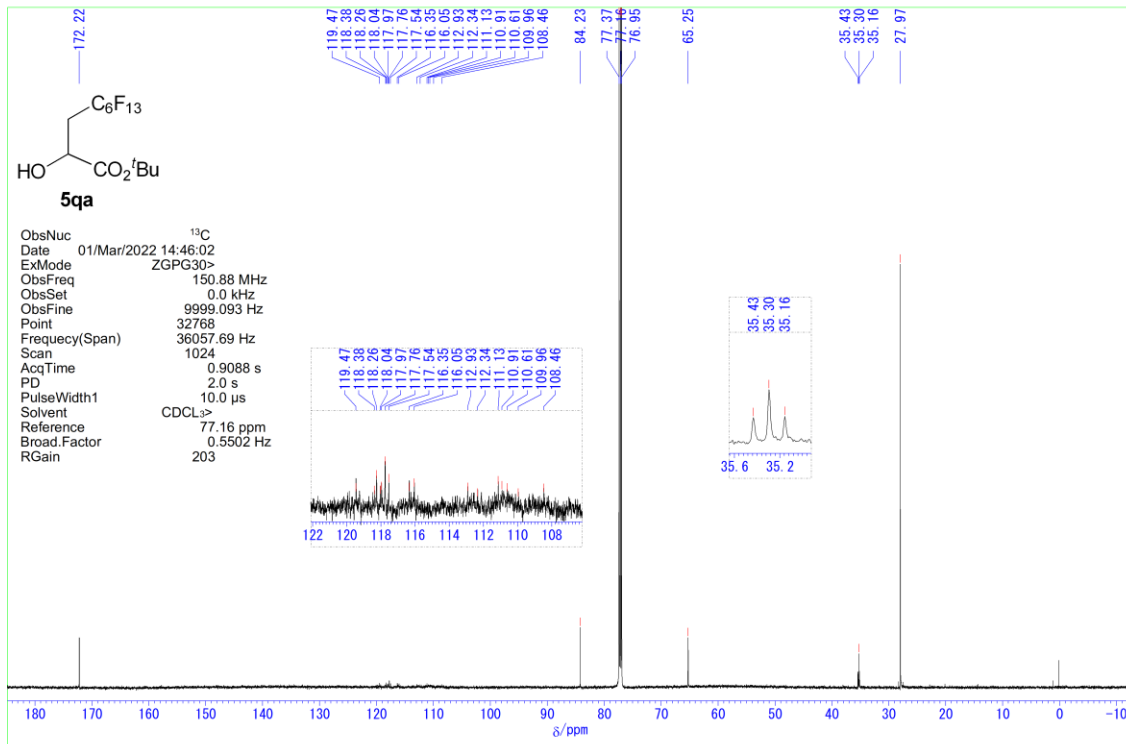

**5qa:**  $^{19}\text{F}$  NMR ( $\text{CDCl}_3$ , 376 MHz)

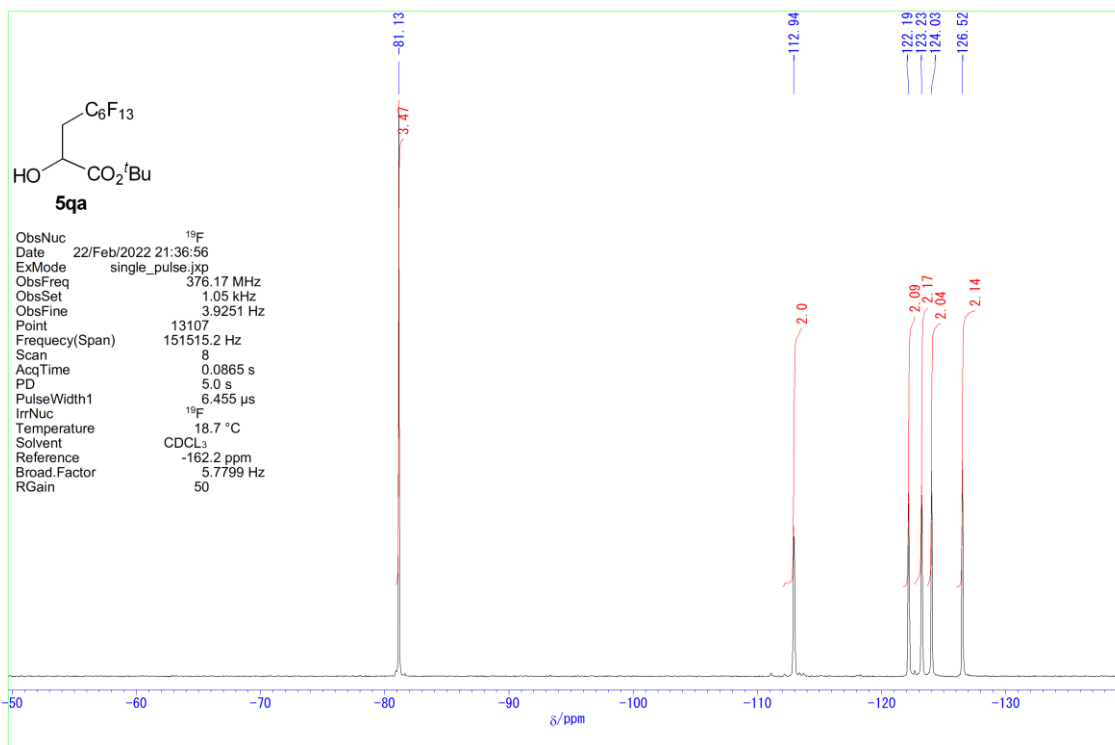

**5ra:**  $^1\text{H}$  NMR ( $\text{CDCl}_3$ , 400 MHz)

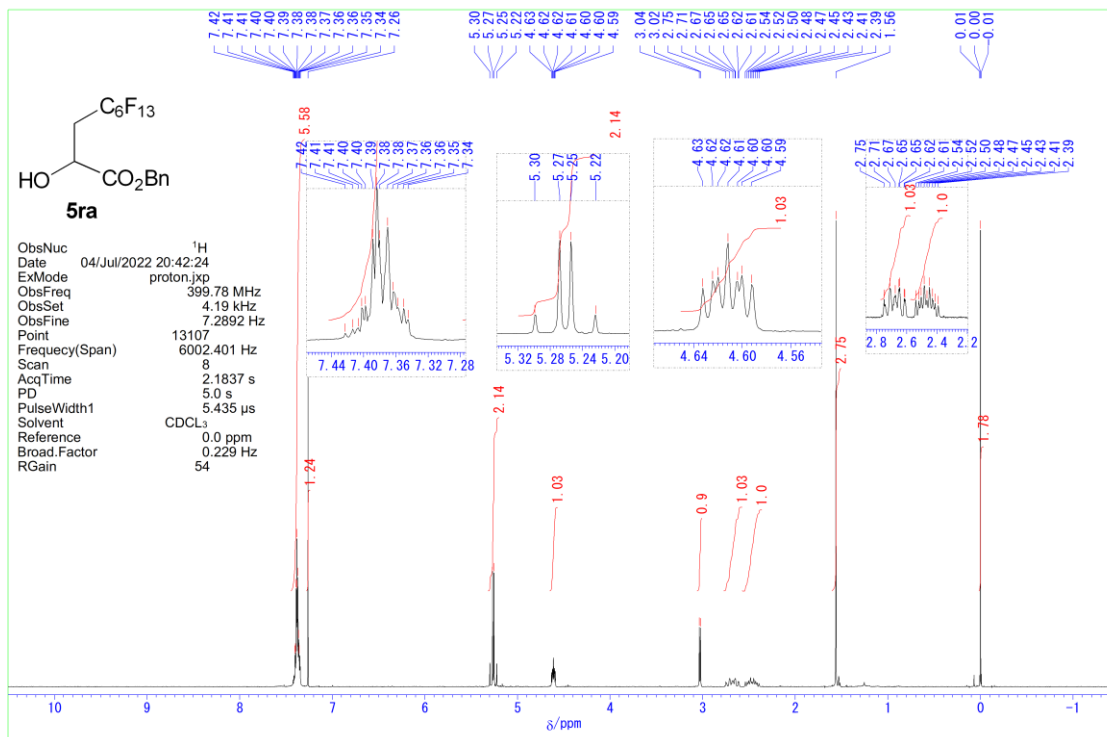

**5ra:**  $^{13}\text{C}$  NMR ( $\text{CDCl}_3$ , 151 MHz)

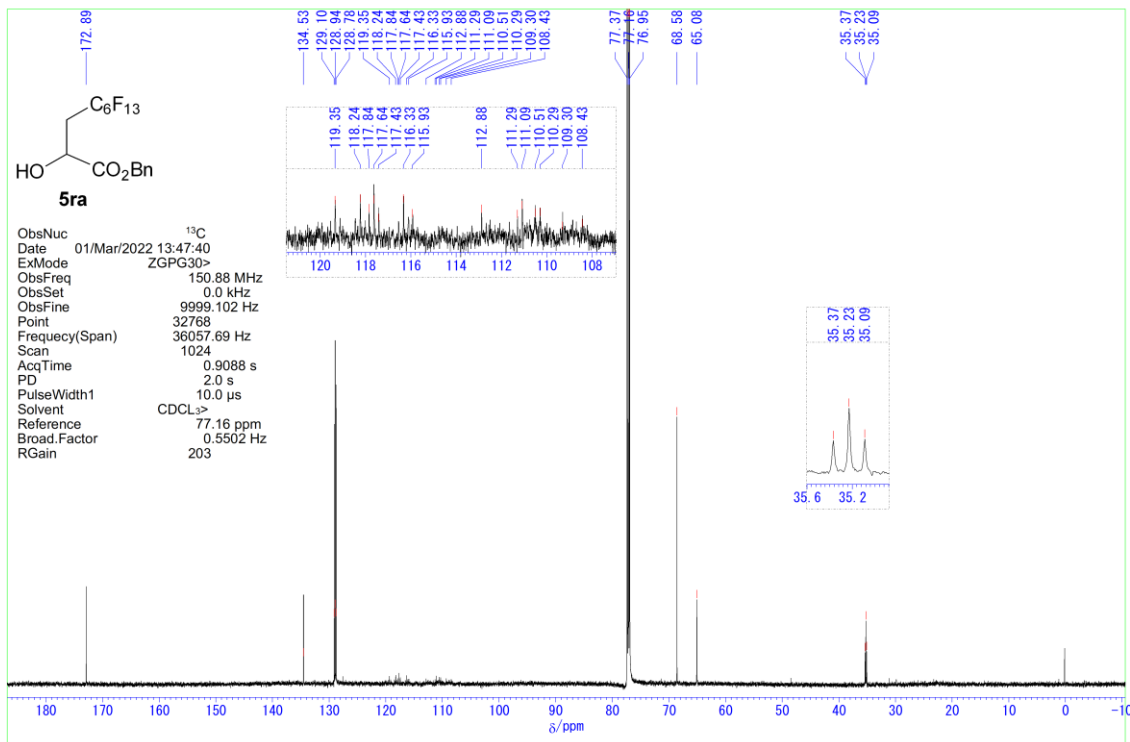

**5ra:**  $^{19}\text{F}$  NMR ( $\text{CDCl}_3$ , 376 MHz)

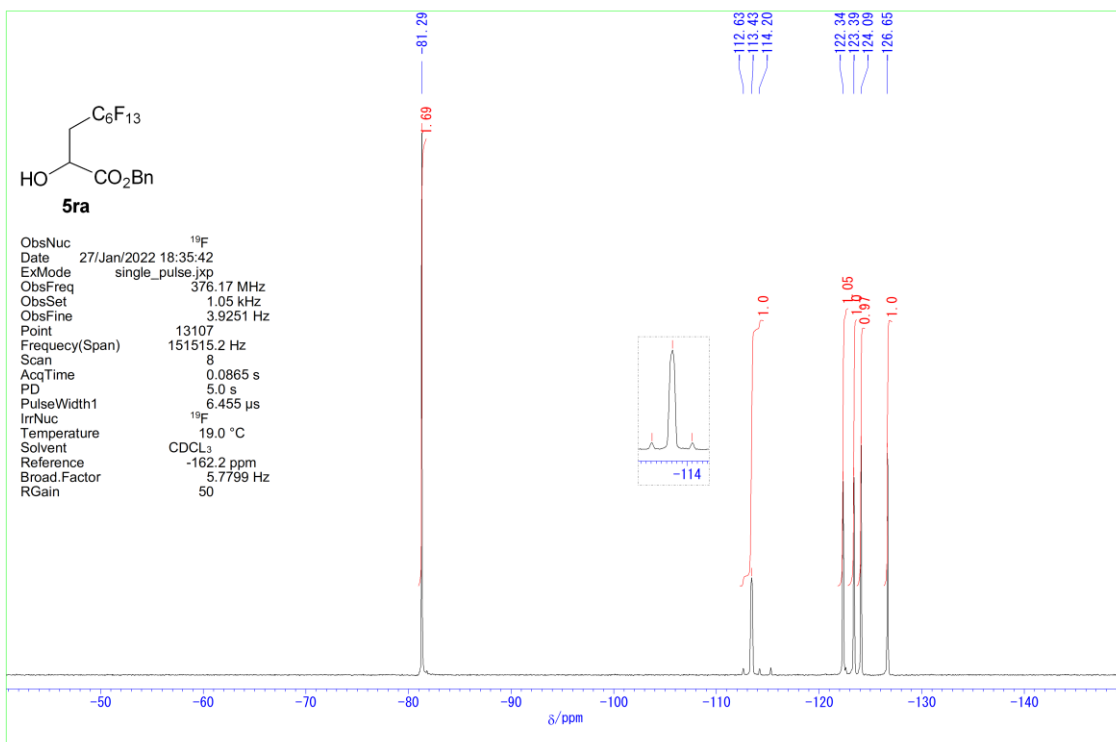

**5sa:**  $^1\text{H}$  NMR ( $\text{CDCl}_3$ , 500 MHz)

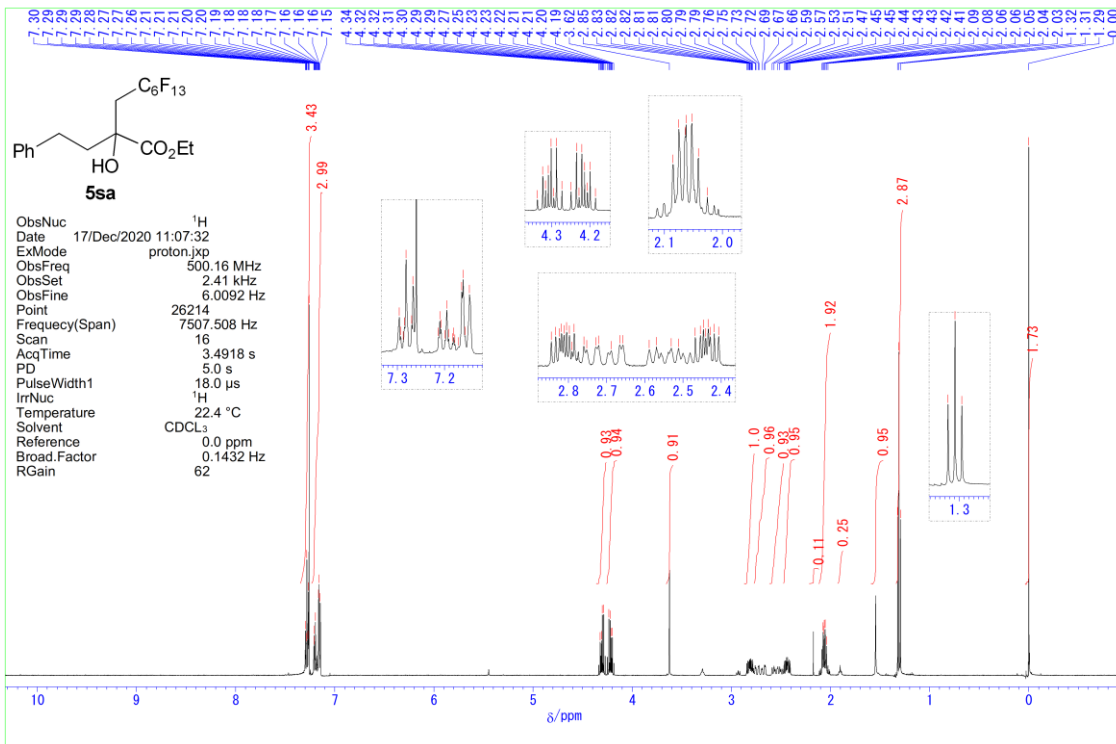

**5sa:**  $^{13}\text{C}$  NMR ( $\text{CDCl}_3$ , 151 MHz)

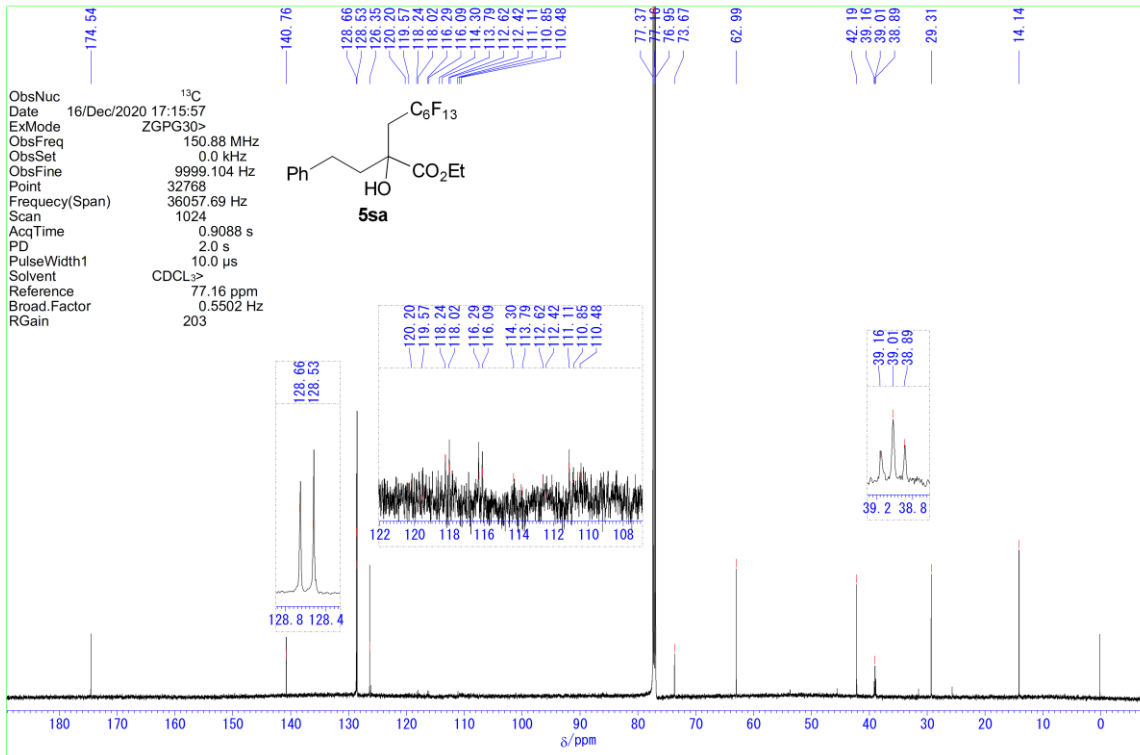

**5sa:**  $^{19}\text{F}$  NMR ( $\text{CDCl}_3$ , 471 MHz)

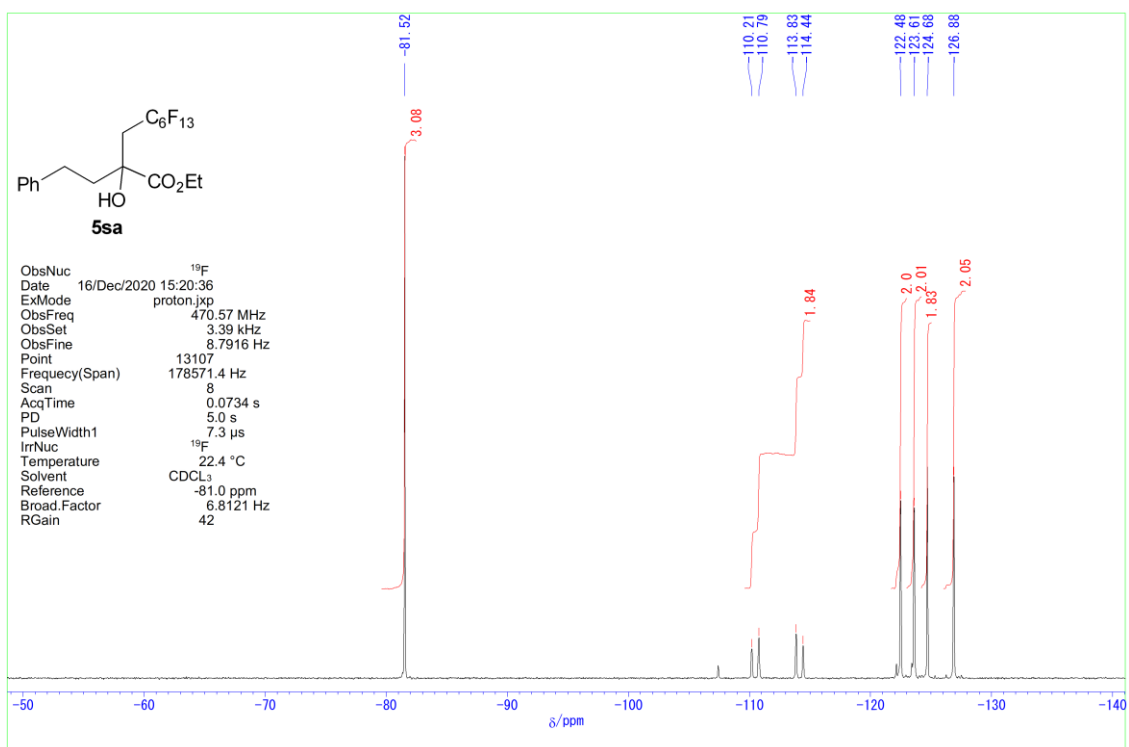

**5ta:**  $^1\text{H}$  NMR ( $\text{CDCl}_3$ , 400 MHz)

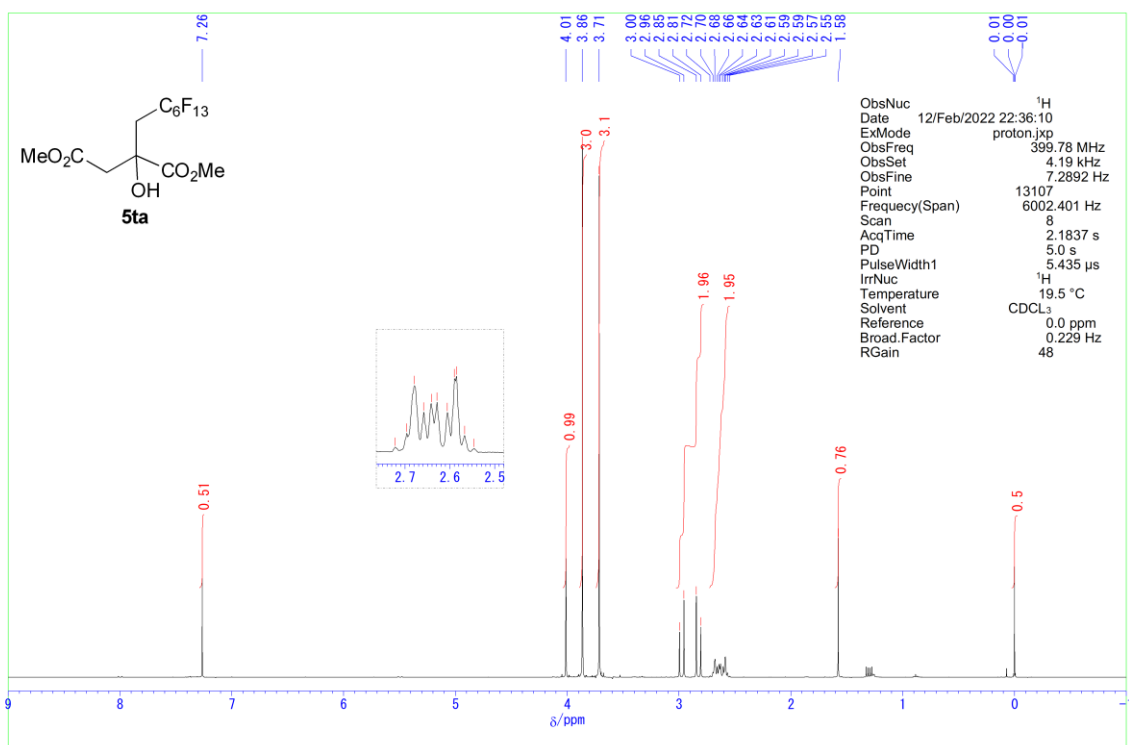

**5ta:**  $^{13}\text{C}$  NMR ( $\text{CDCl}_3$ , 151 MHz)

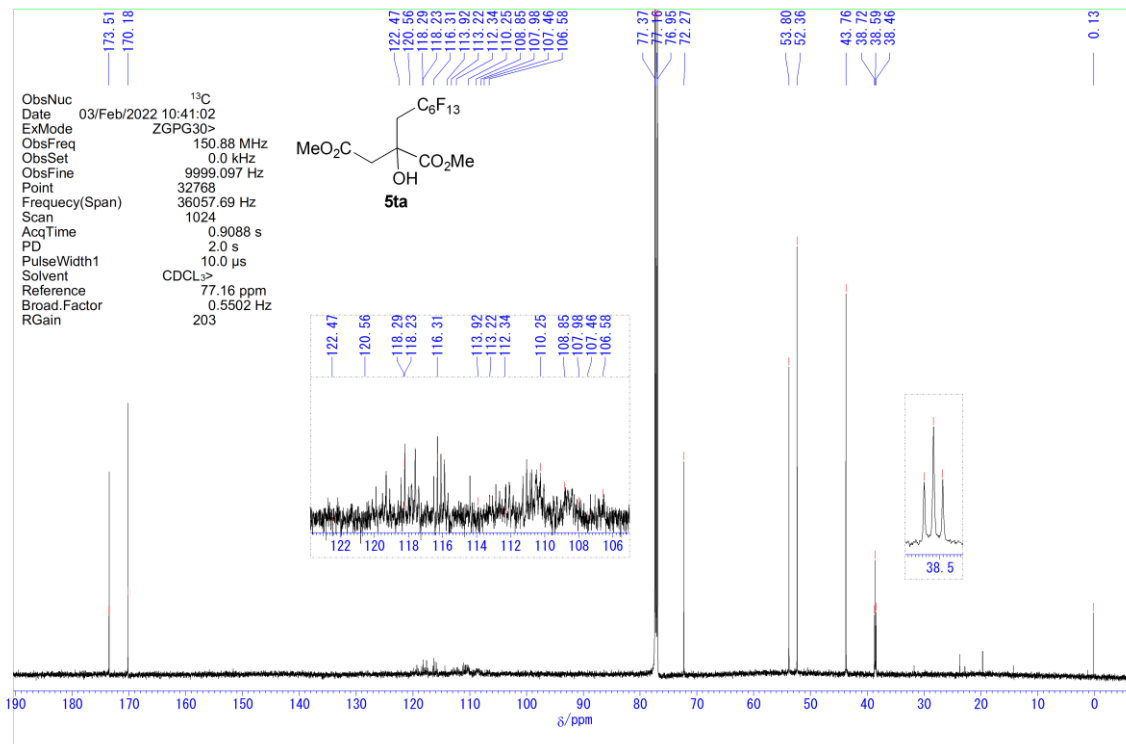

**5ta:**  $^{19}\text{F}$  NMR ( $\text{CDCl}_3$ , 376 MHz)

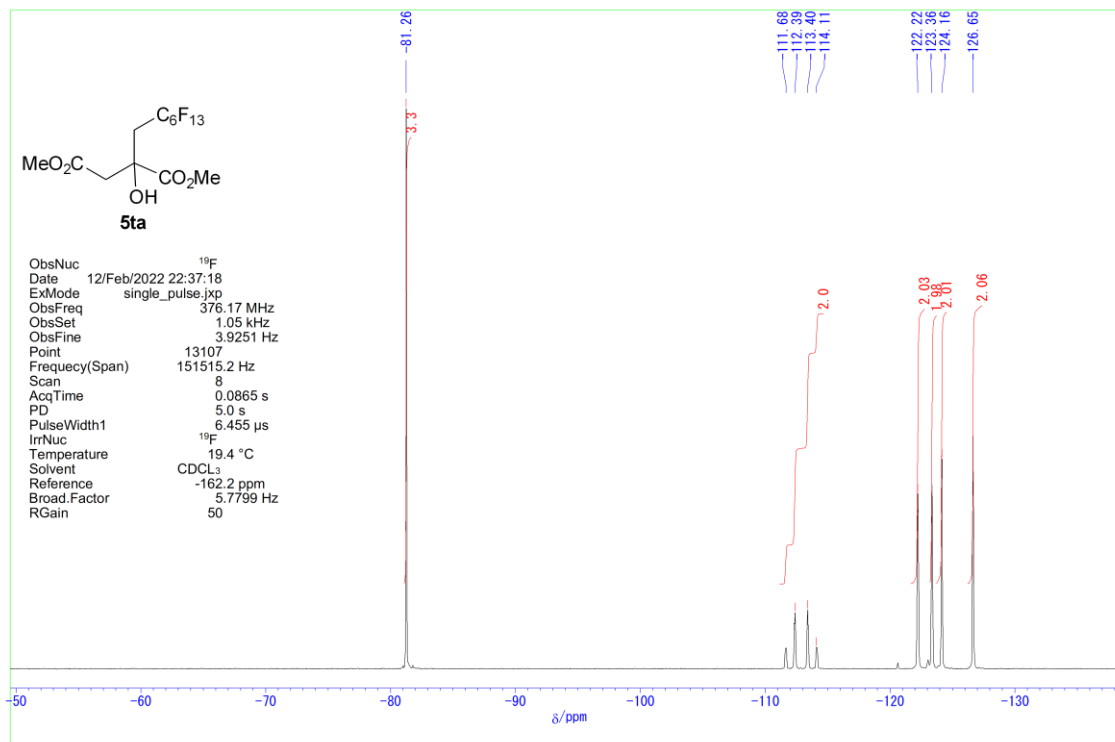

**5ua:**  $^1\text{H}$  NMR ( $\text{CDCl}_3$ , 400 MHz)

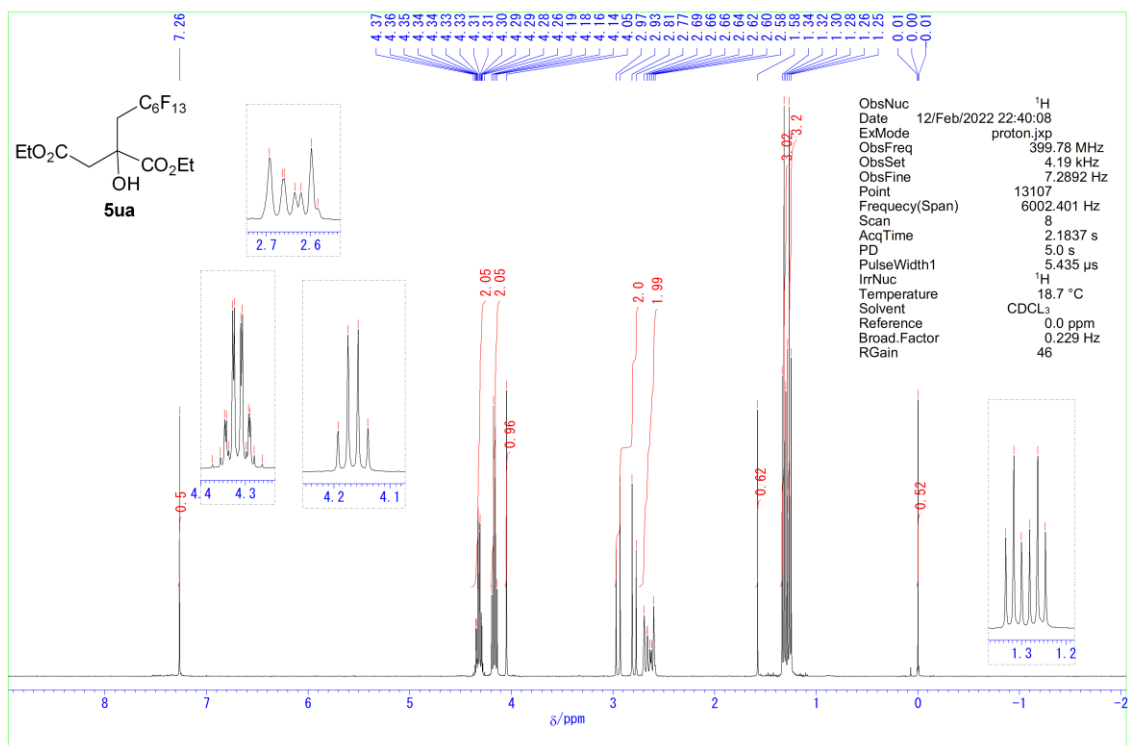

**5ua:**  $^{13}\text{C}$  NMR ( $\text{CDCl}_3$ , 151 MHz)

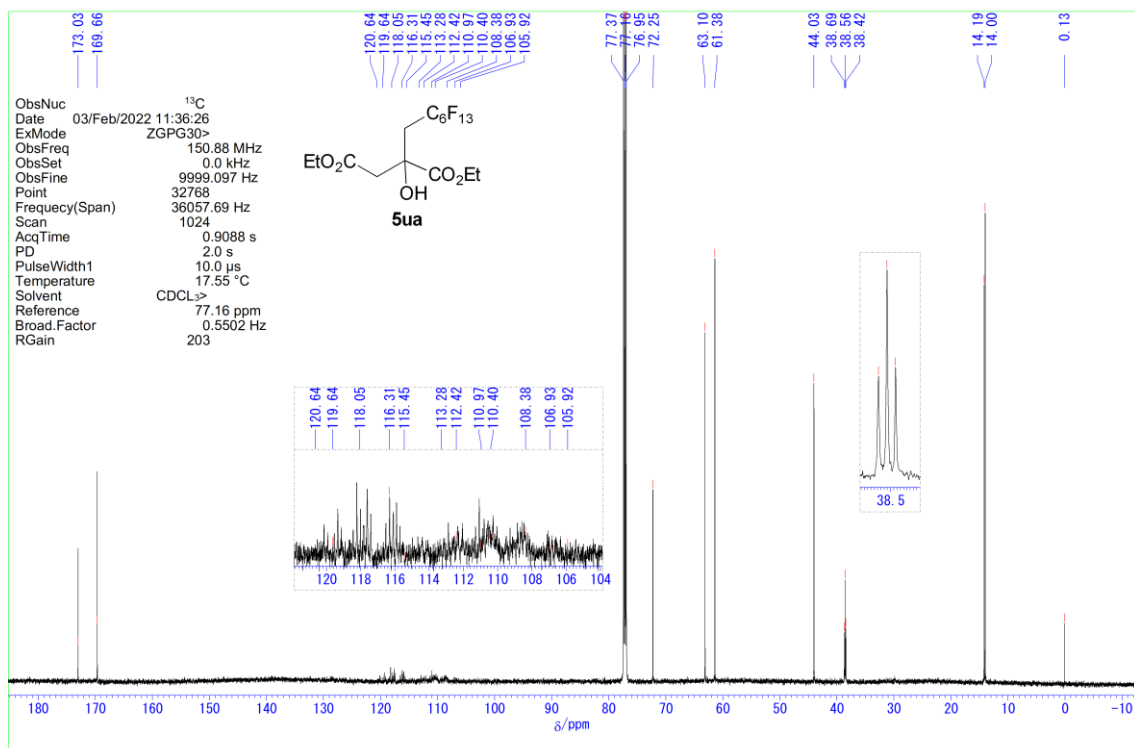



**5ua:**  $^{19}\text{F}$  NMR ( $\text{CDCl}_3$ , 376 MHz)

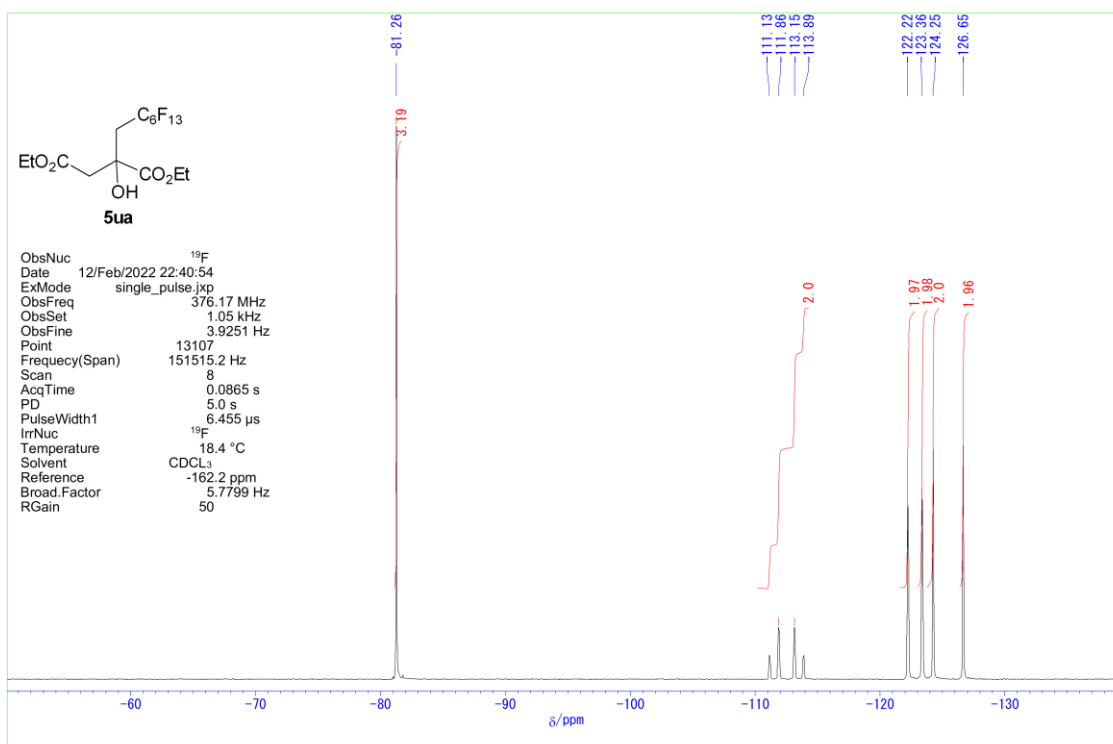

**5ab:**  $^1\text{H}$  NMR ( $\text{CDCl}_3$ , 400 MHz)

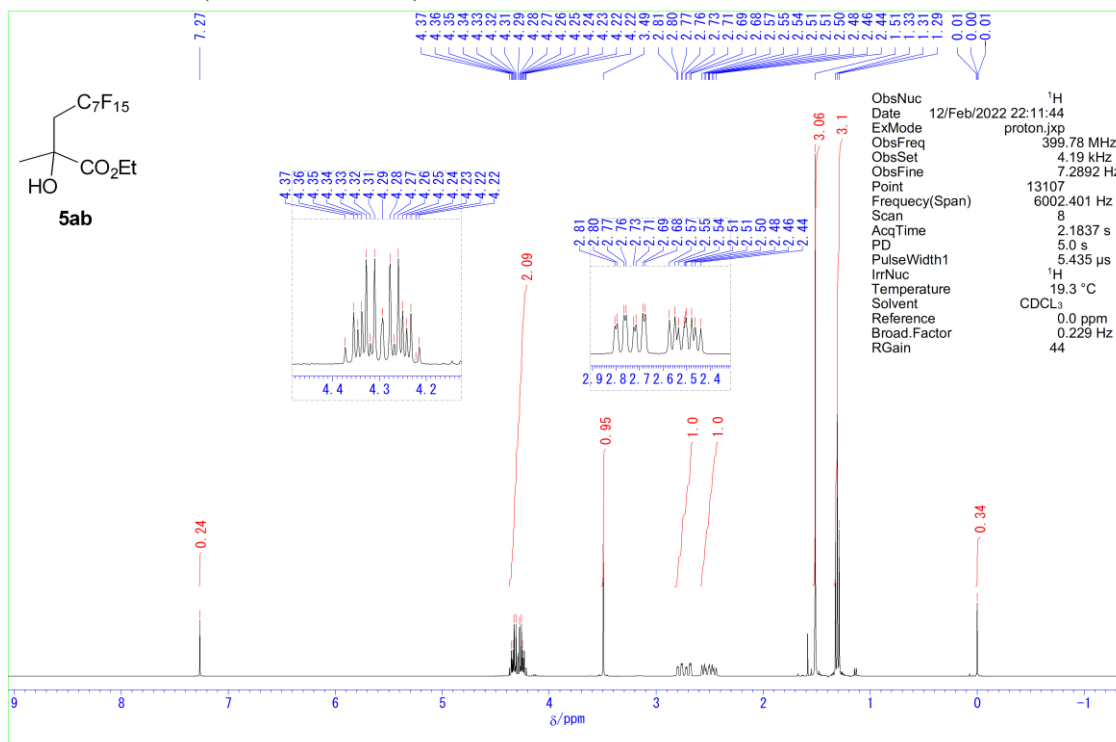

**5ab:**  $^{13}\text{C}$  NMR ( $\text{CDCl}_3$ , 151 MHz)

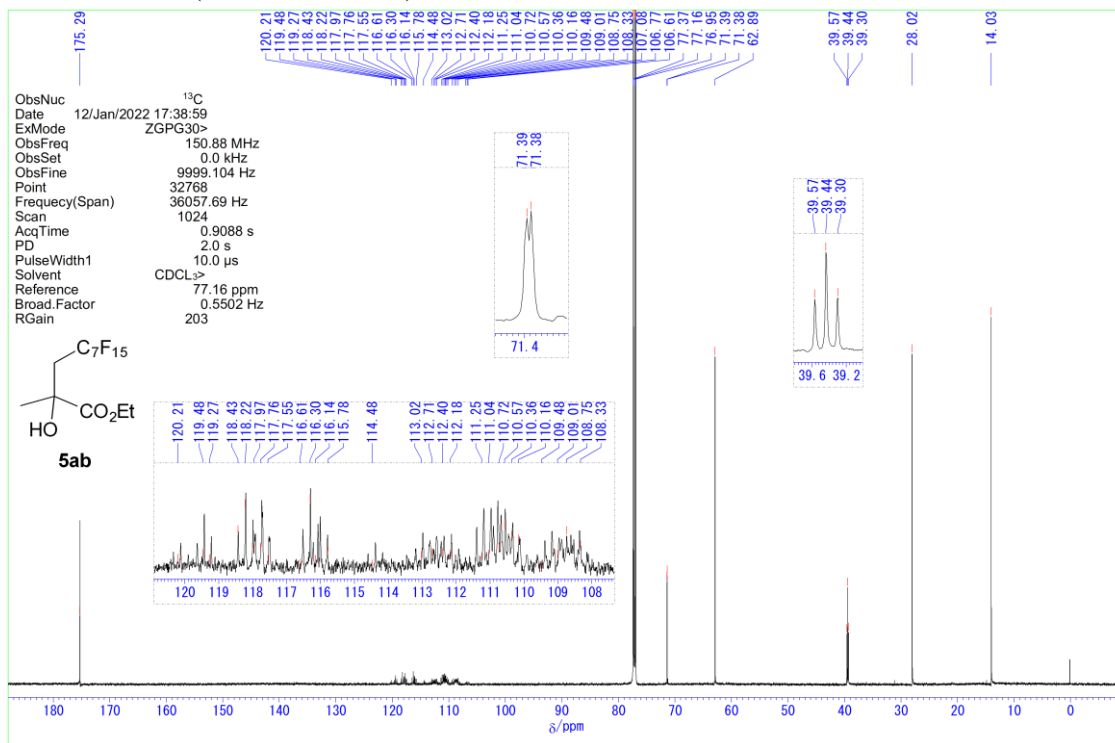

**5ab:**  $^{19}\text{F}$  NMR ( $\text{CDCl}_3$ , 376 MHz)

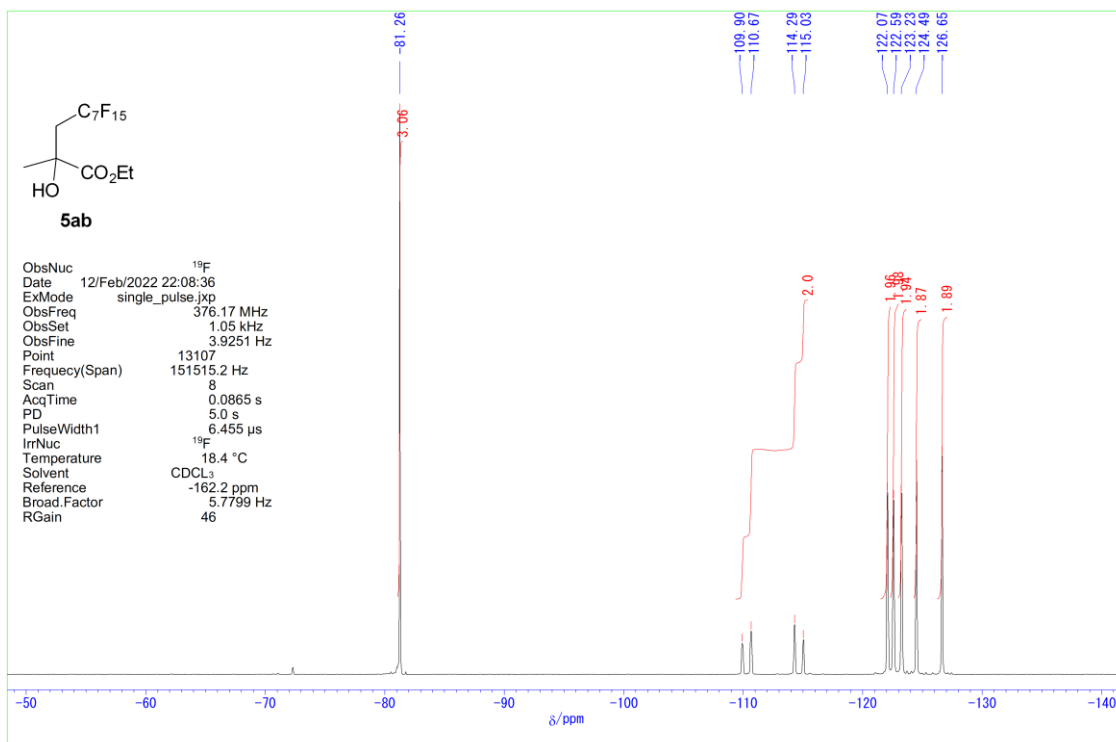

**5ac:**  $^1\text{H}$  NMR ( $\text{CDCl}_3$ , 400 MHz)

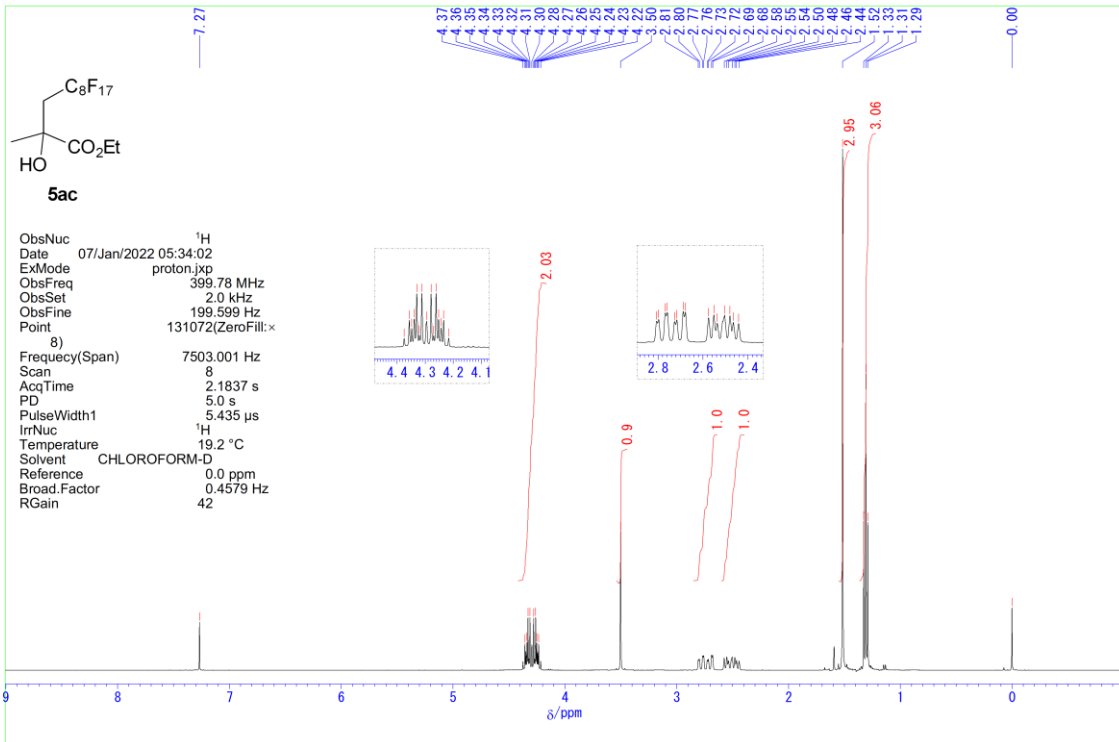

**5ac:**  $^{13}\text{C}$  NMR ( $\text{CDCl}_3$ , 151 MHz)

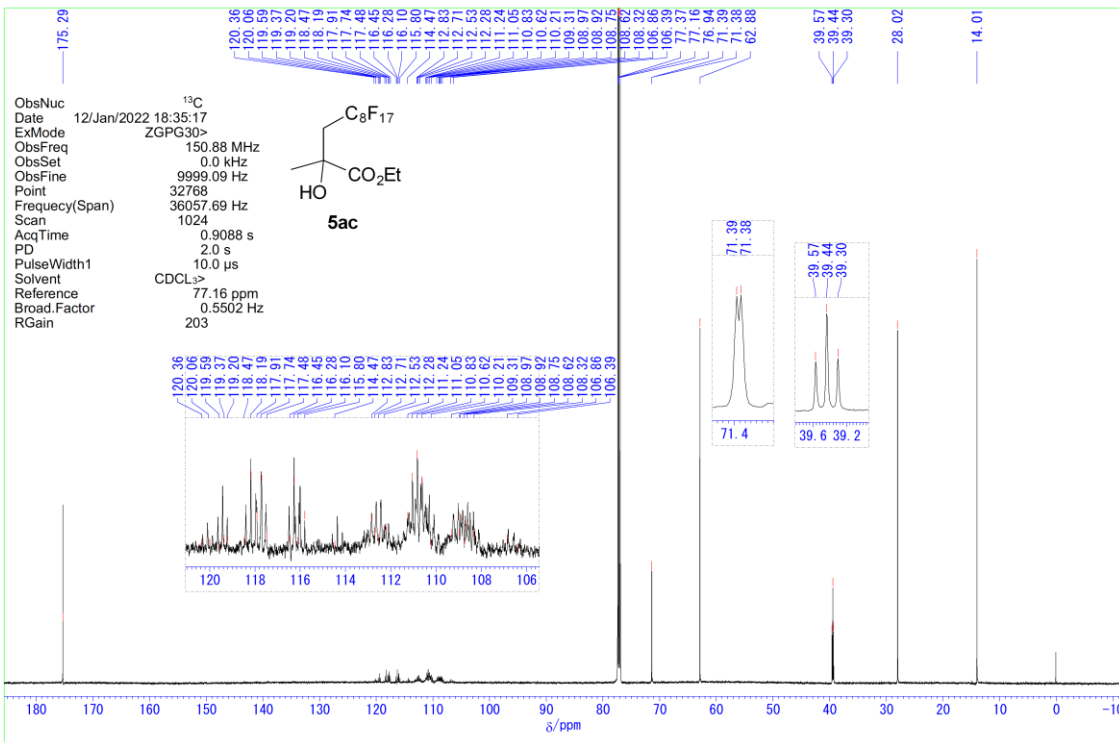

**5ac:**  $^{19}\text{F}$  NMR ( $\text{CDCl}_3$ , 376 MHz)

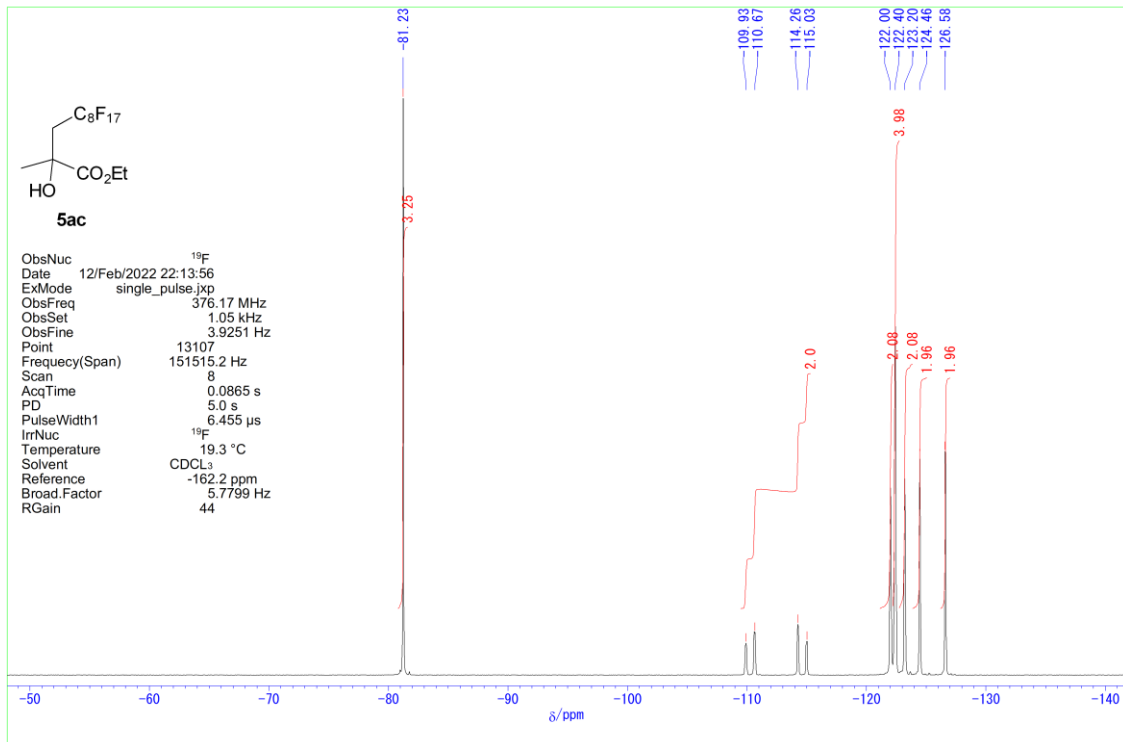

**5ad:**  $^1\text{H}$  NMR ( $\text{CDCl}_3$ , 400 MHz)

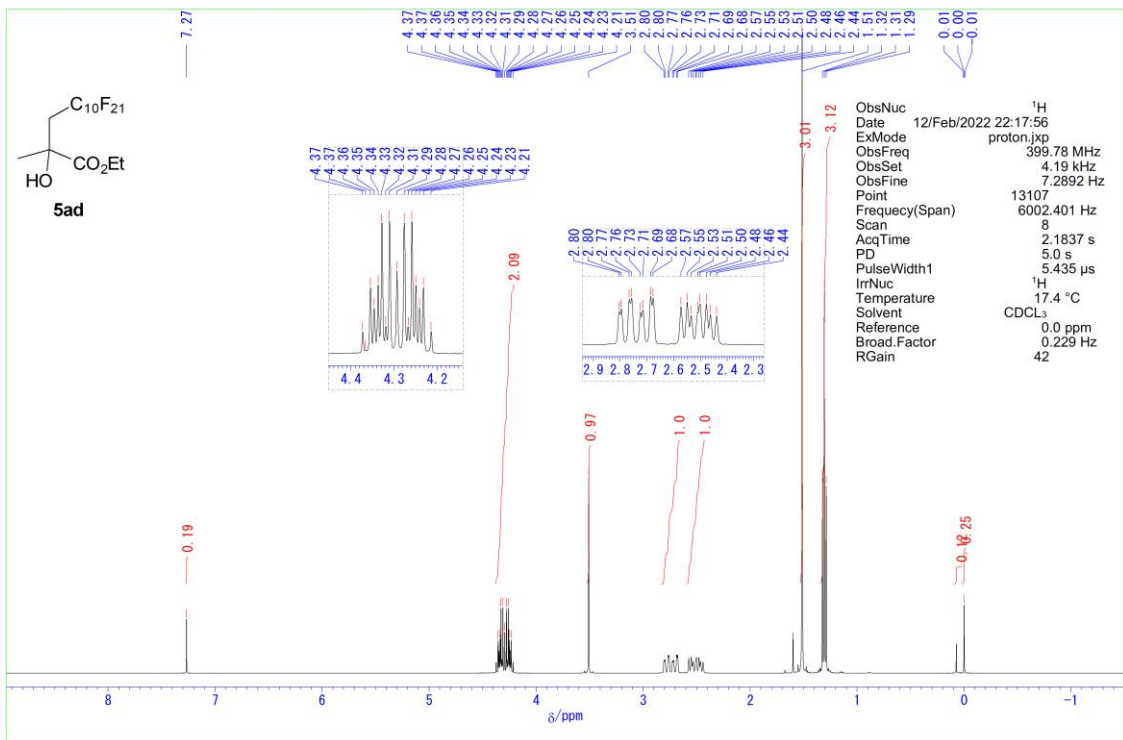

**5ad:**  $^{13}\text{C}$  NMR ( $\text{CDCl}_3$ , 151 MHz)

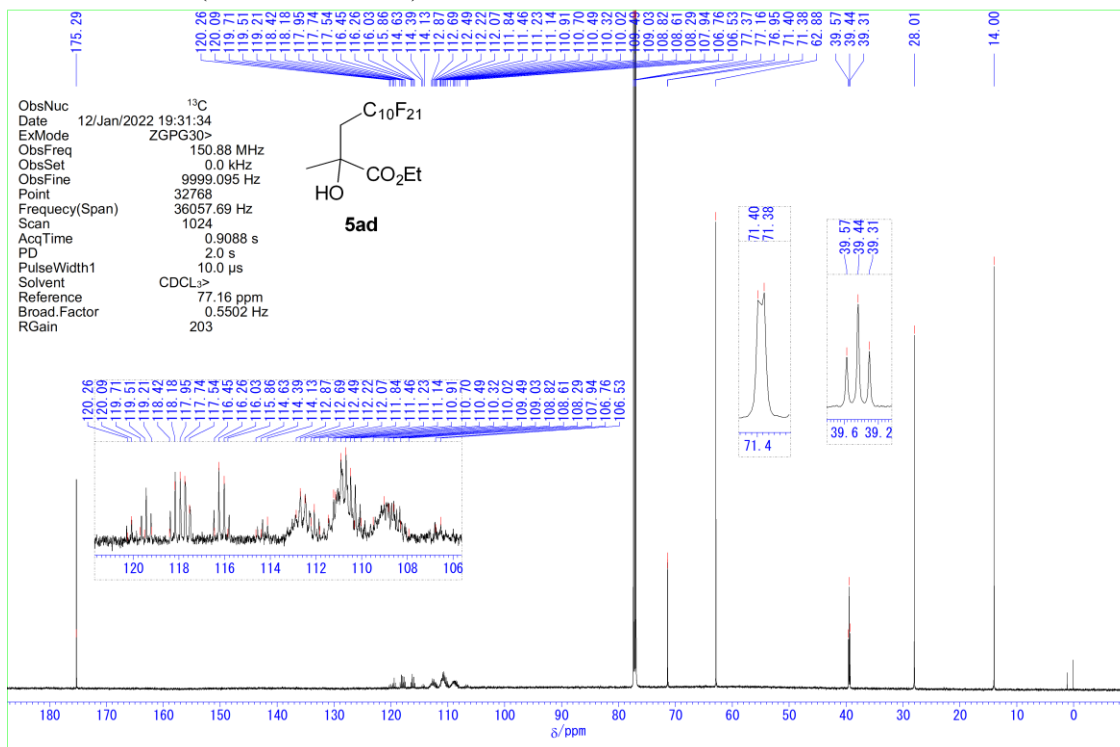

**5ad:**  $^{19}\text{F}$  NMR ( $\text{CDCl}_3$ , 376 MHz)

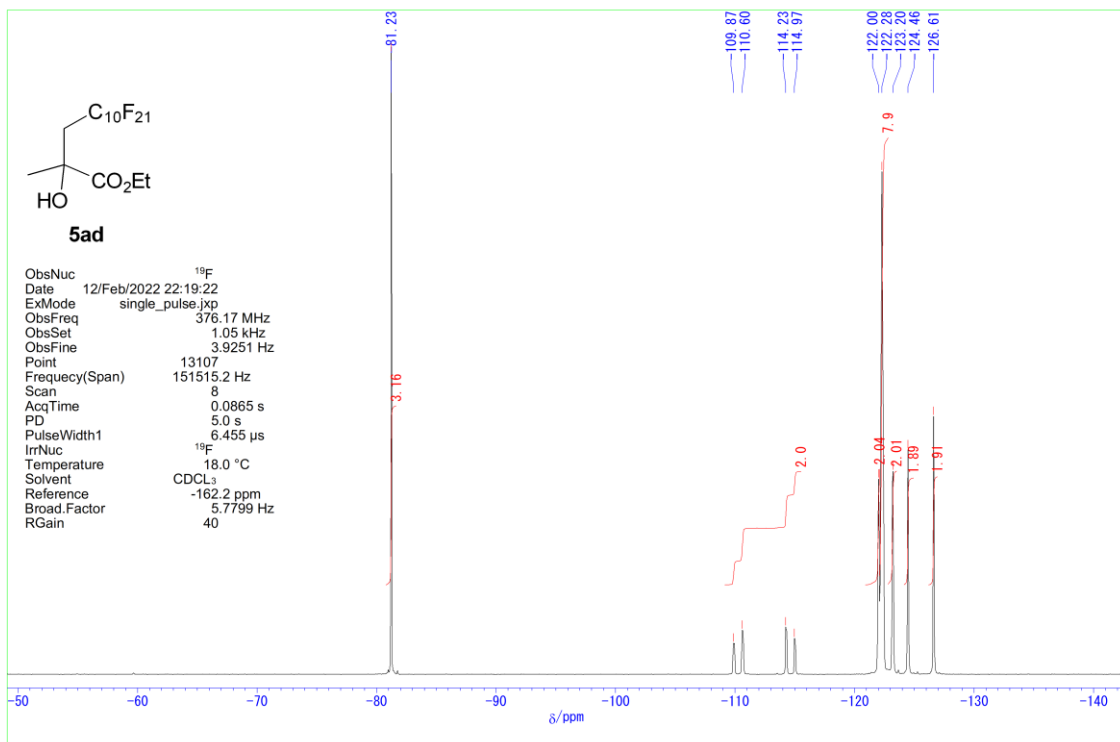

**5ae:**  $^1\text{H}$  NMR ( $\text{CDCl}_3$ , 400 MHz)

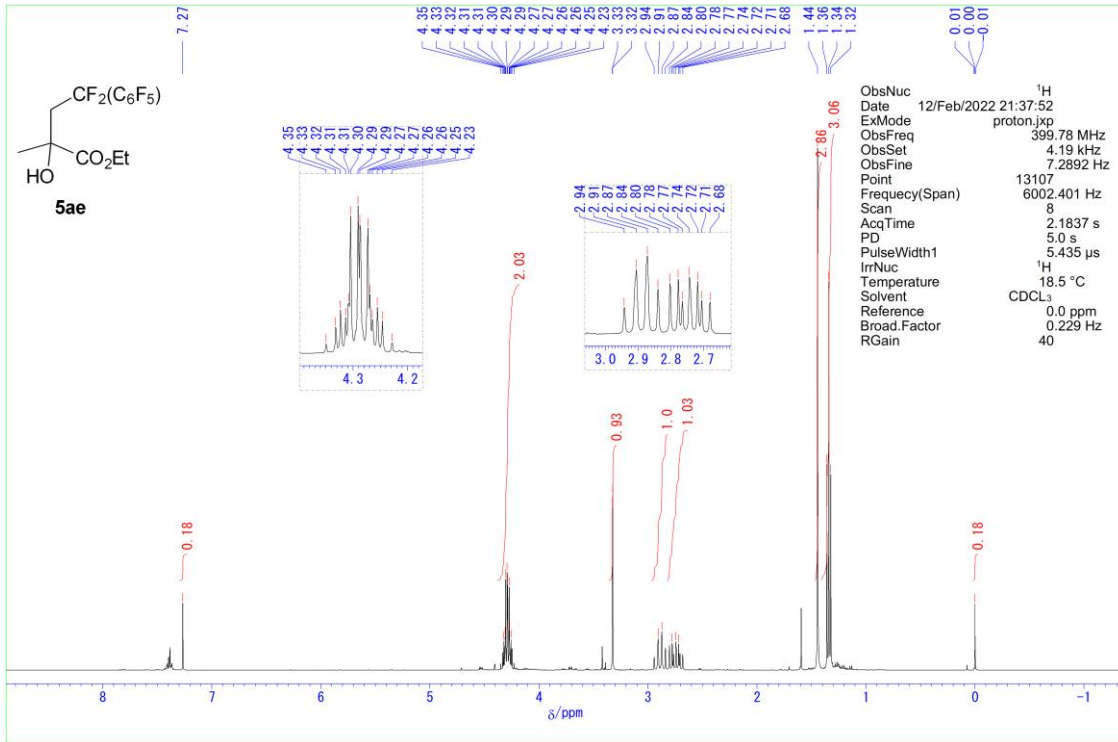

**5ae:**  $^{13}\text{C}$  NMR ( $\text{CDCl}_3$ , 151 MHz)

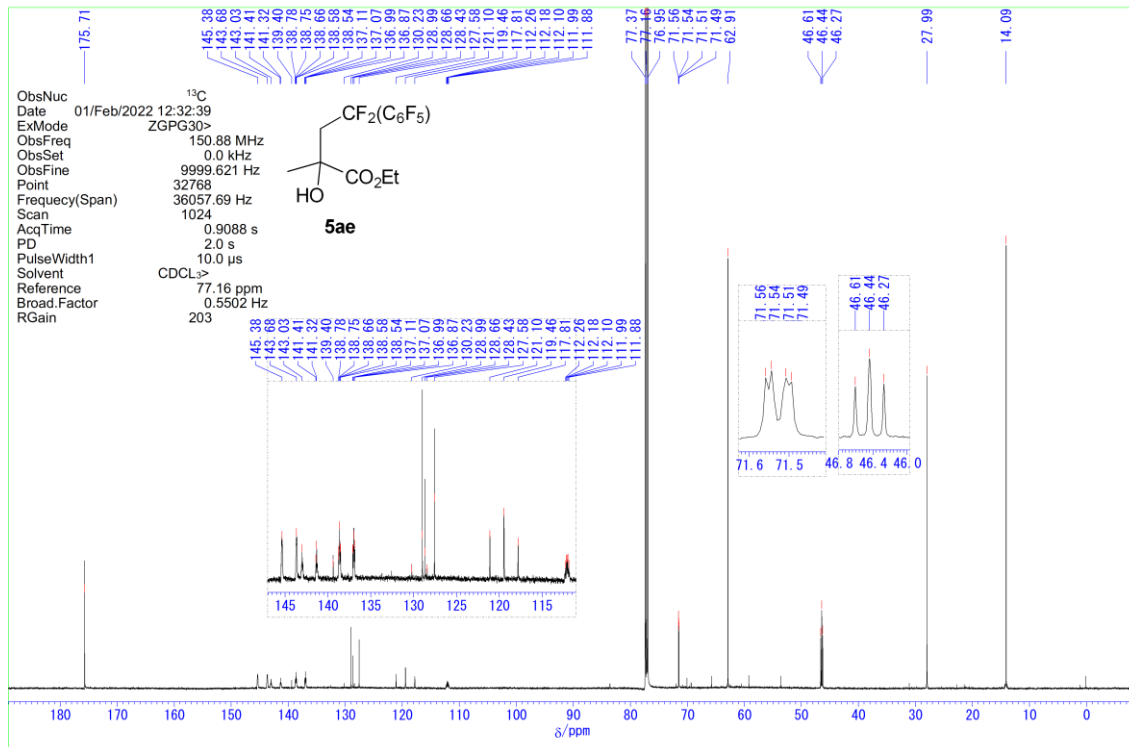

**5ae:**  $^{19}\text{F}$  NMR ( $\text{CDCl}_3$ , 376 MHz)

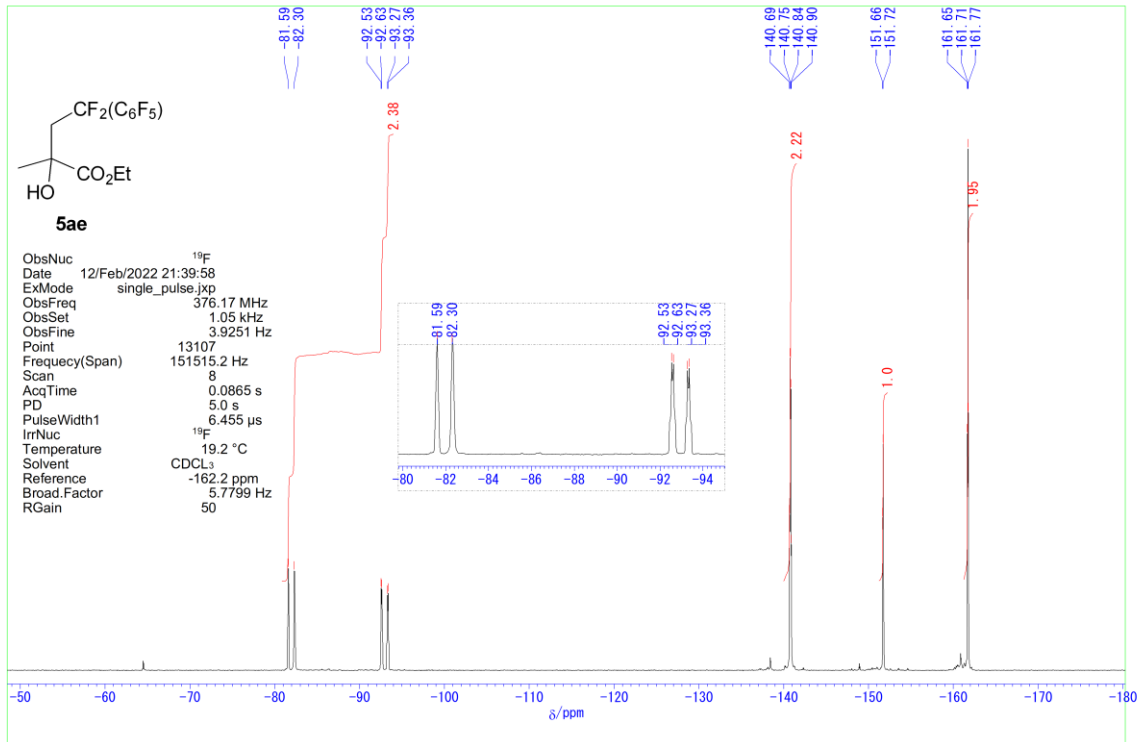

**5df:**  $^1\text{H}$  NMR ( $\text{CDCl}_3$ , 400 MHz)

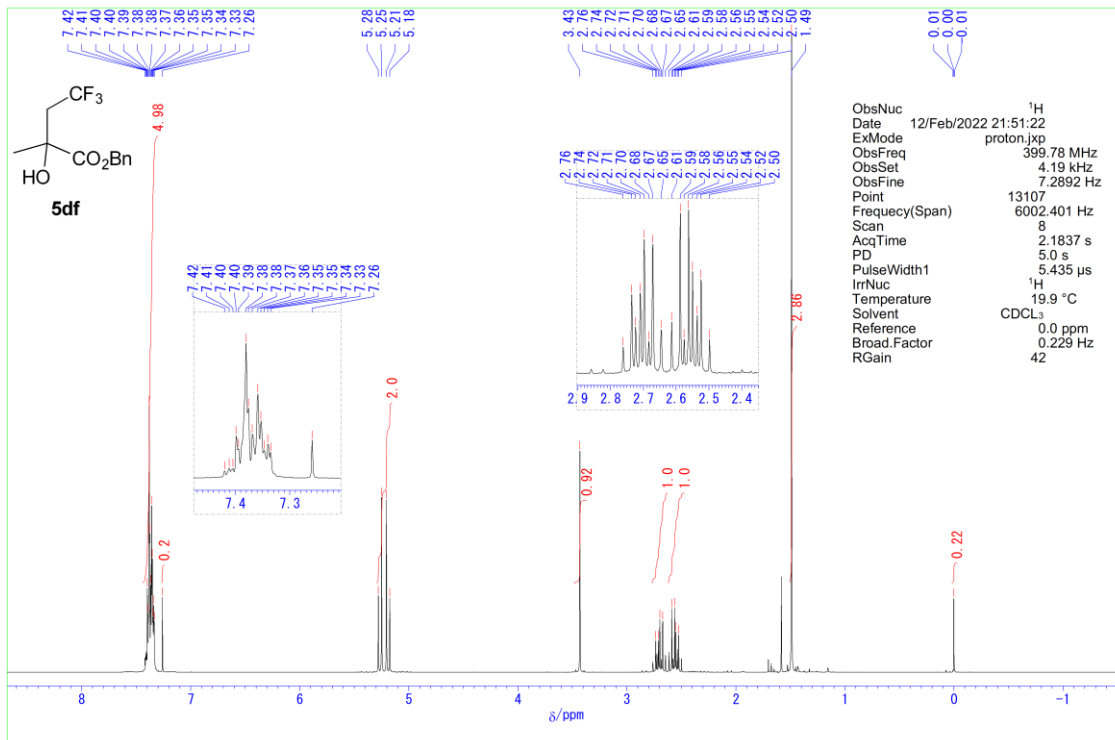

**5df:**  $^{13}\text{C}$  NMR ( $\text{CDCl}_3$ , 151 MHz)

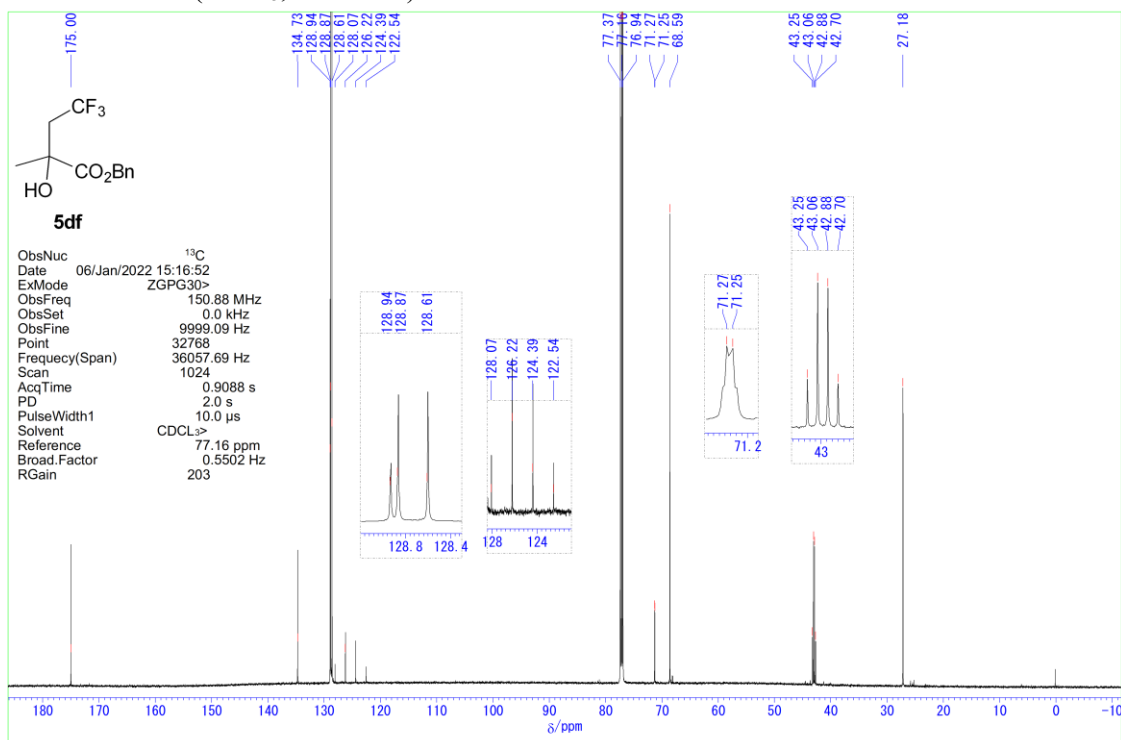

**5df:**  $^{19}\text{F}$  NMR ( $\text{CDCl}_3$ , 376 MHz)

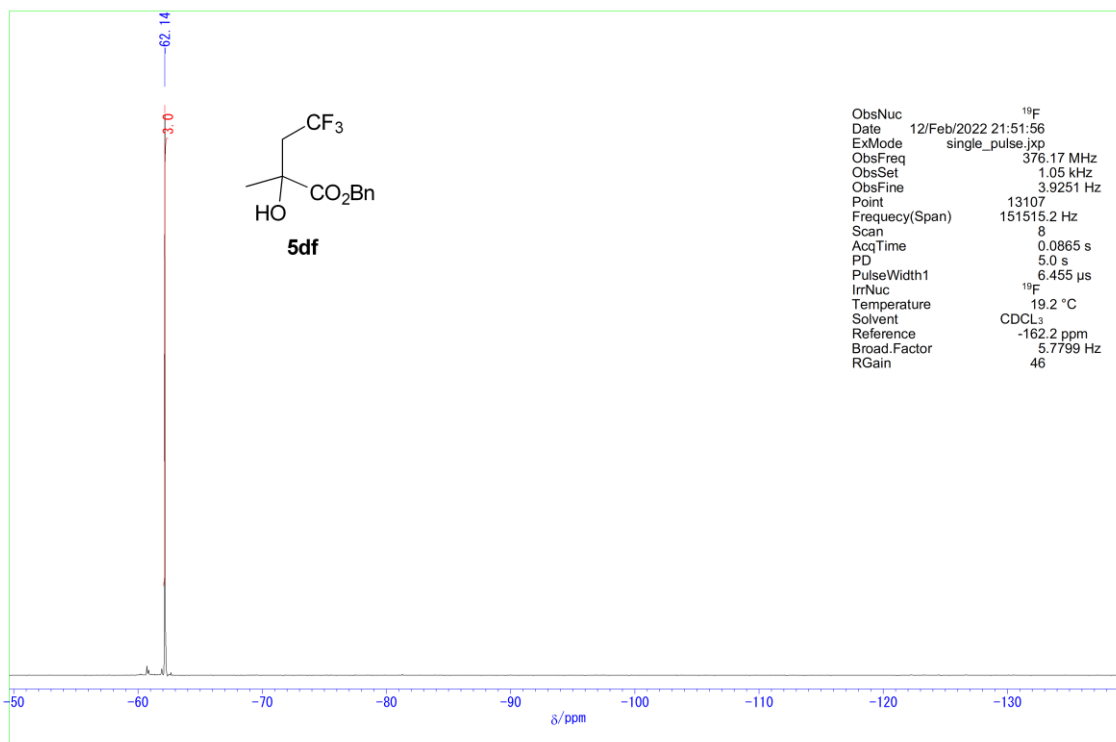



**5dg:**  $^1\text{H}$  NMR ( $\text{CDCl}_3$ , 400 MHz)

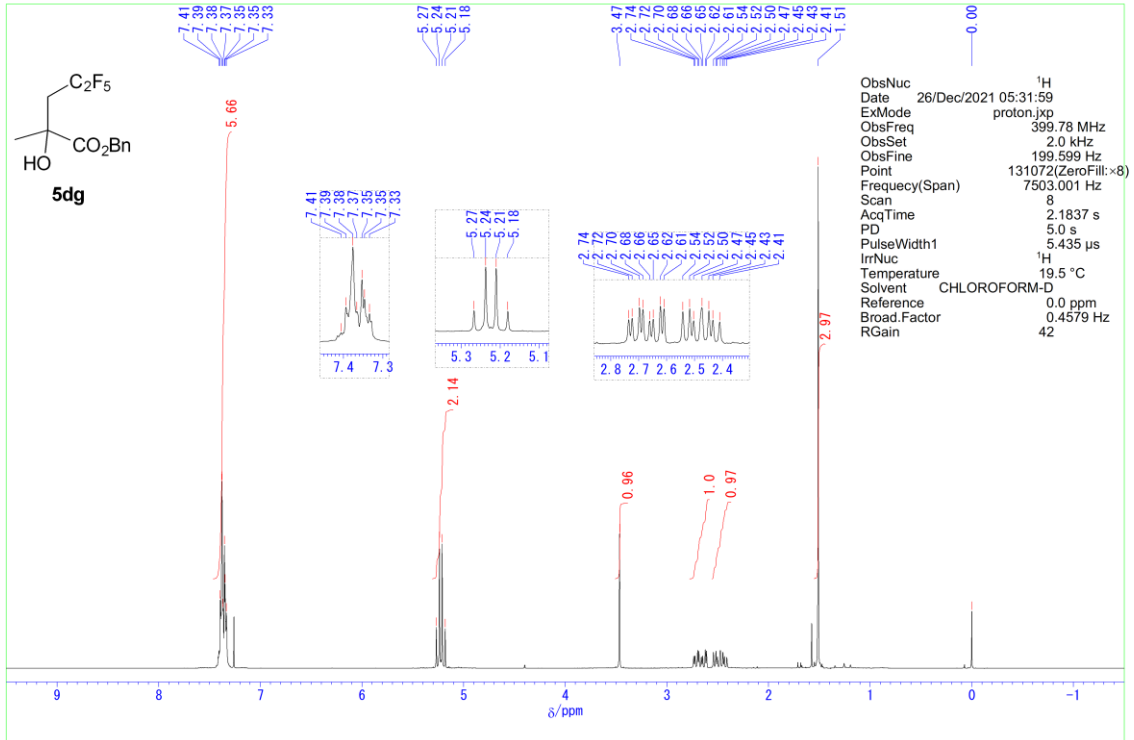

**5dg:**  $^{13}\text{C}$  NMR ( $\text{CDCl}_3$ , 151 MHz)

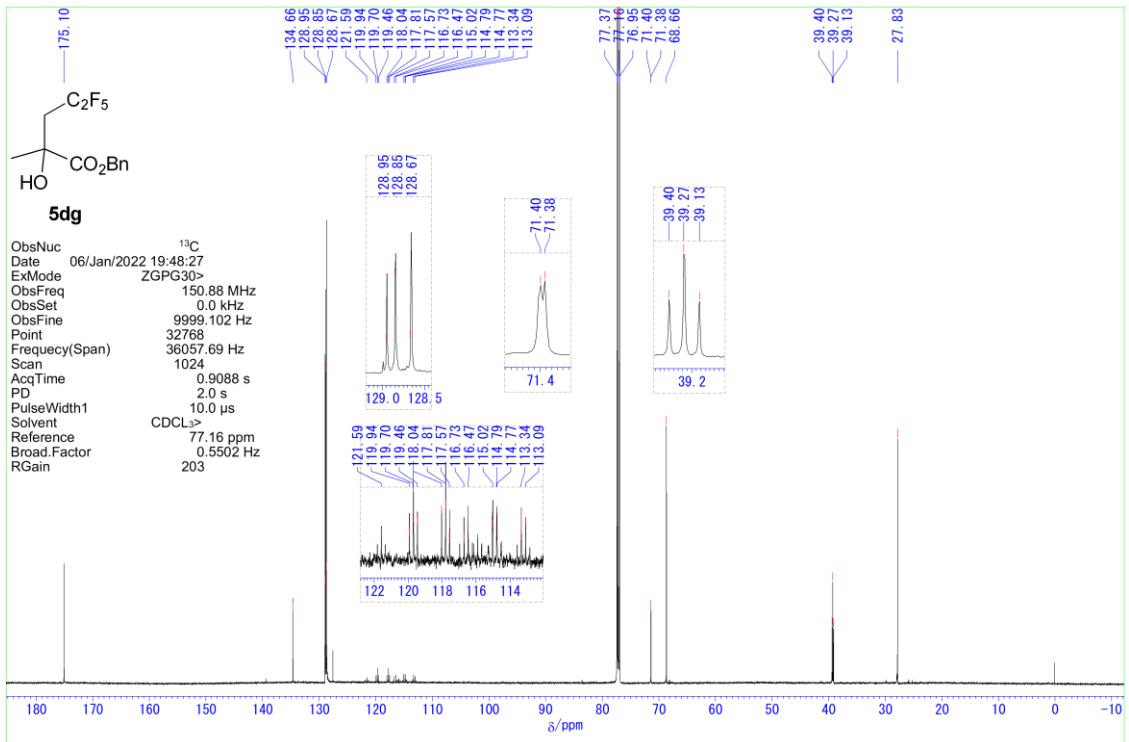

**5dg:**  $^{19}\text{F}$  NMR ( $\text{CDCl}_3$ , 376 MHz)

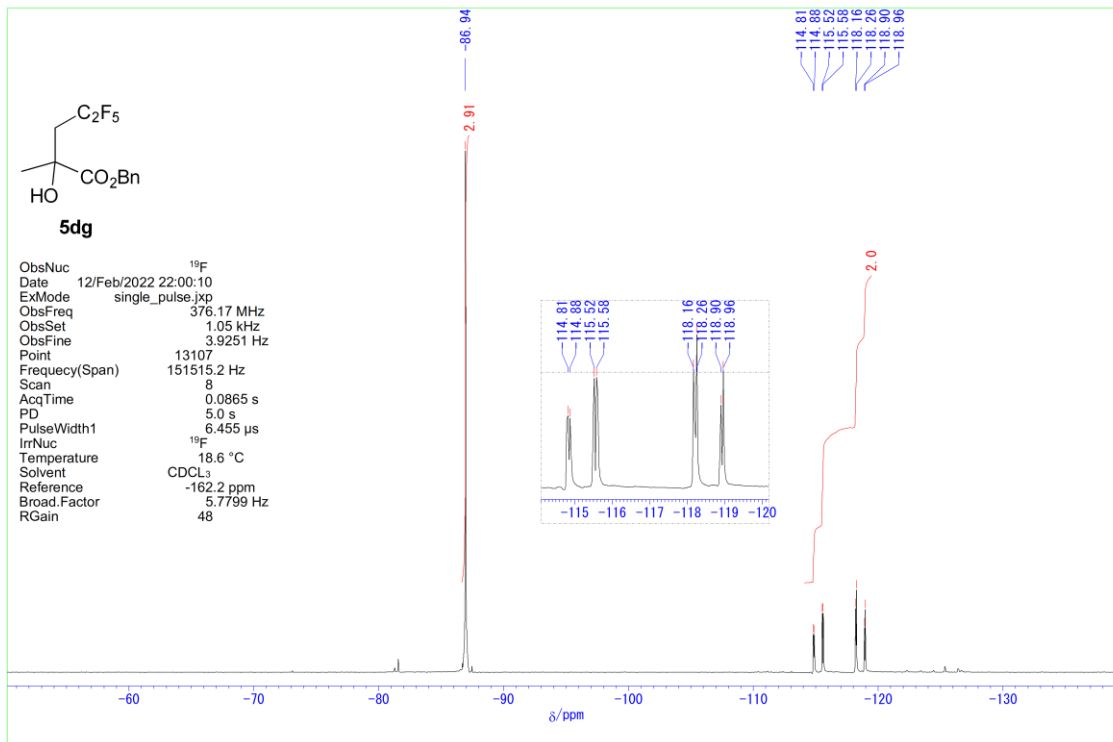

**5dh:**  $^1\text{H}$  NMR ( $\text{CDCl}_3$ , 400 MHz)

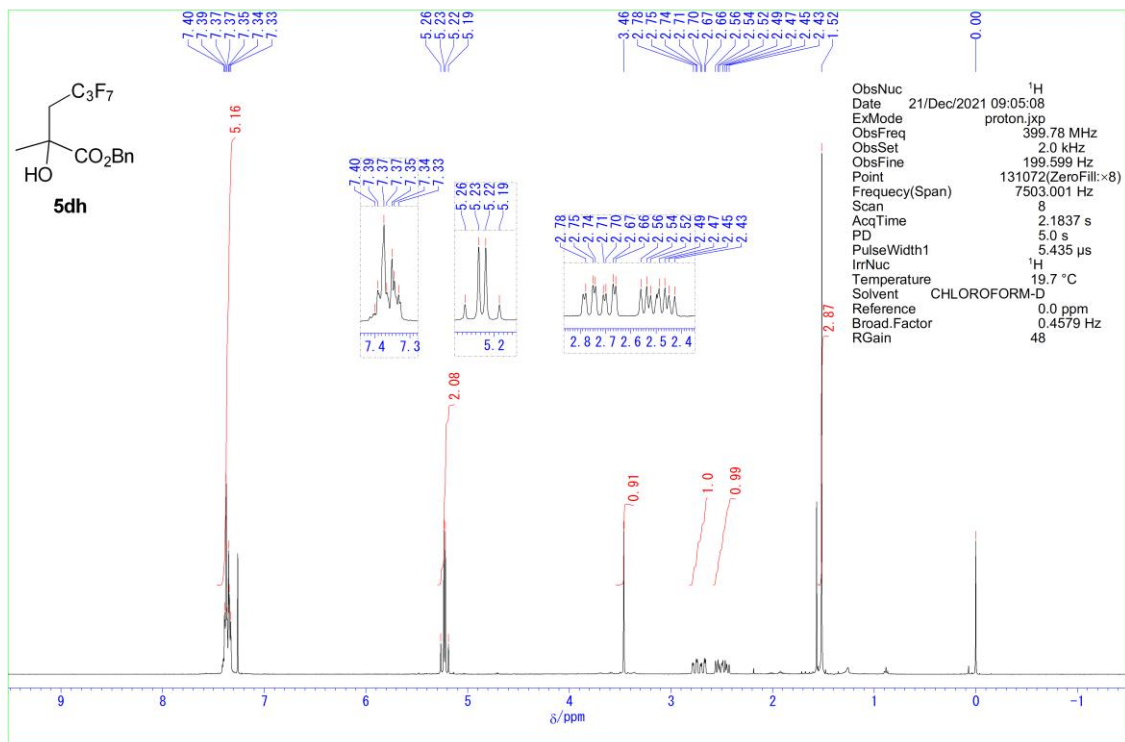

**5dh:**  $^{13}\text{C}$  NMR ( $\text{CDCl}_3$ , 151 MHz)

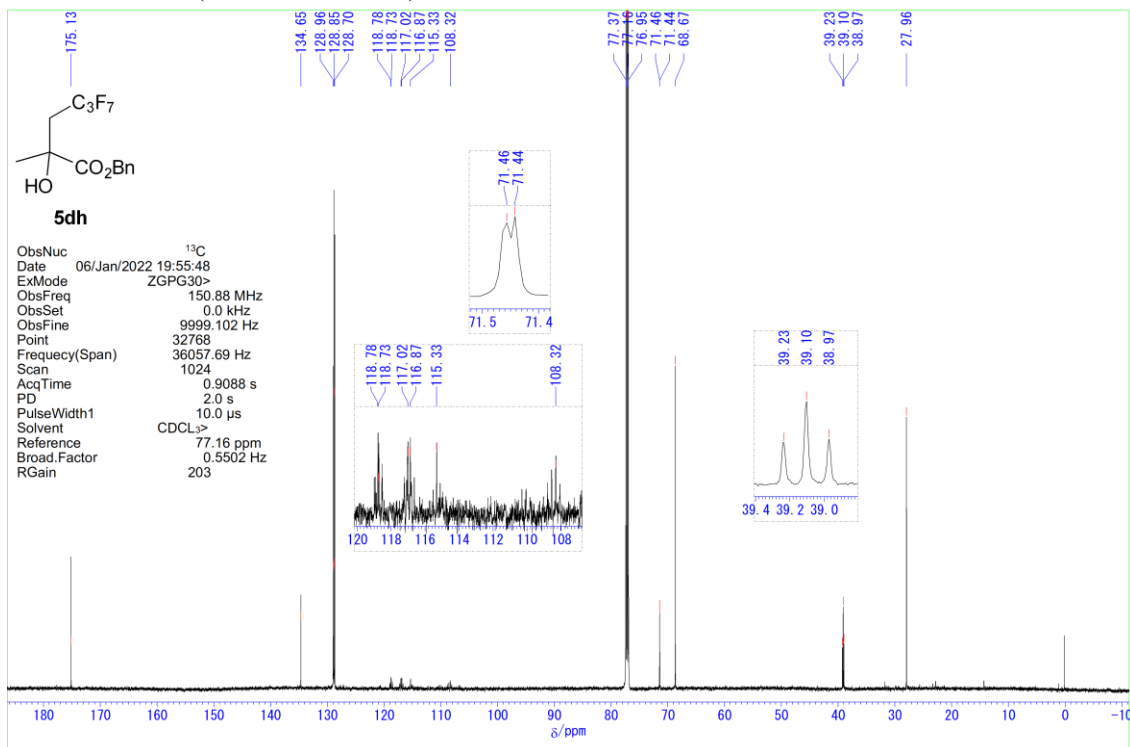

**5dh:**  $^{19}\text{F}$  NMR ( $\text{CDCl}_3$ , 376 MHz)

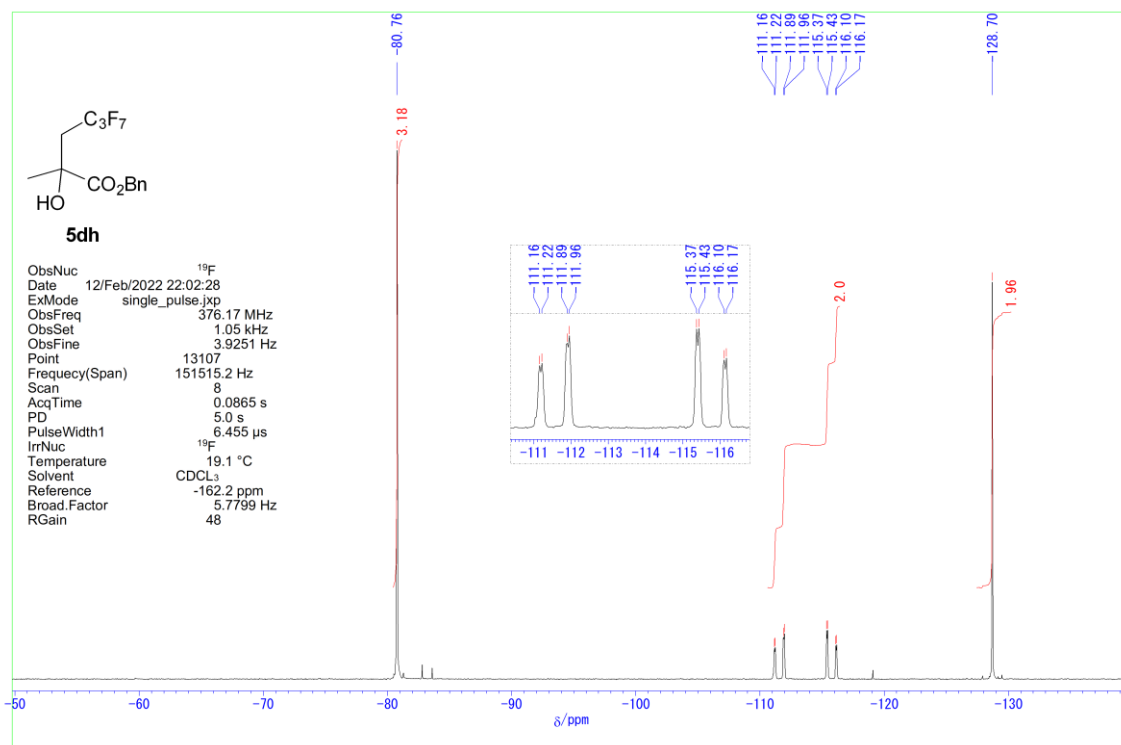

**5di:**  $^1\text{H}$  NMR ( $\text{CDCl}_3$ , 400 MHz)

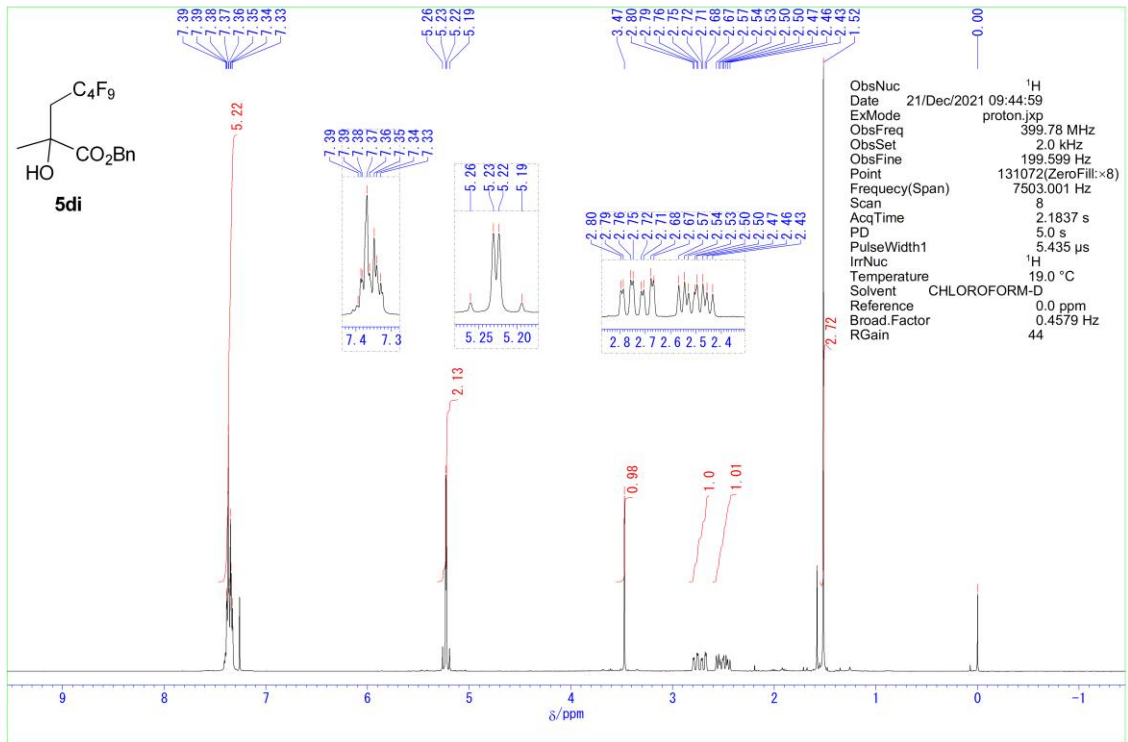

**5di:**  $^{13}\text{C}$  NMR ( $\text{CDCl}_3$ , 151 MHz)

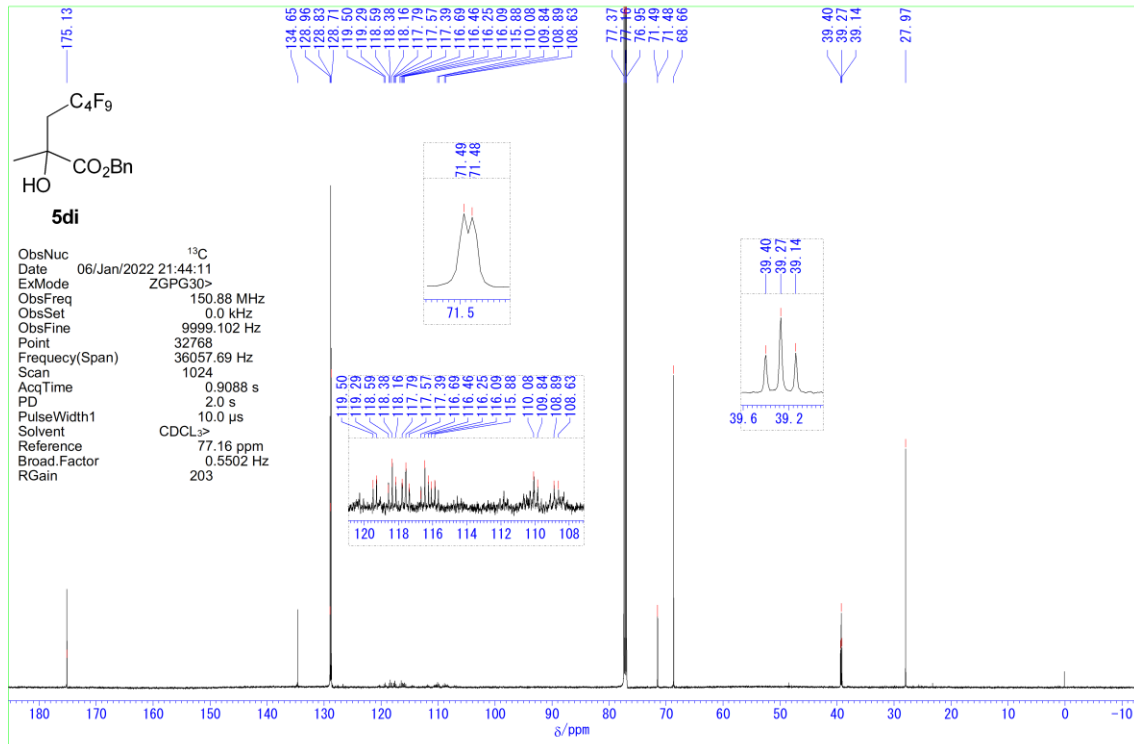

**5di:**  $^{19}\text{F}$  NMR ( $\text{CDCl}_3$ , 376 MHz)

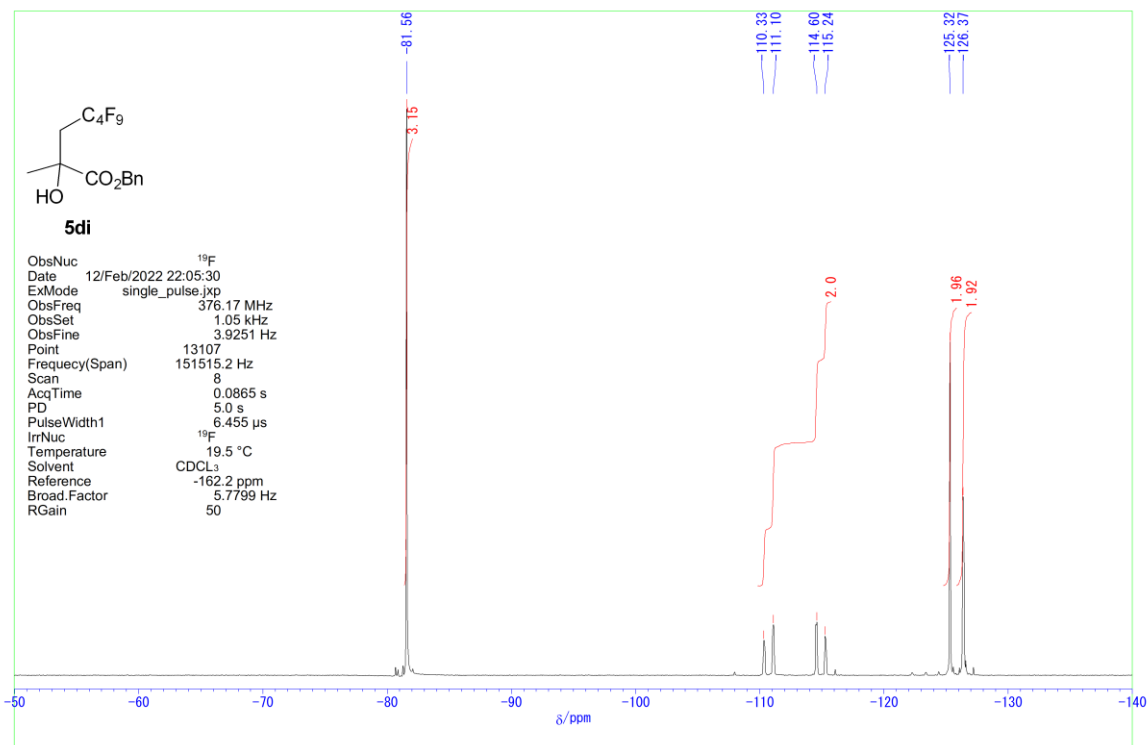

**5dj:**  $^1\text{H}$  NMR ( $\text{CDCl}_3$ , 400 MHz)

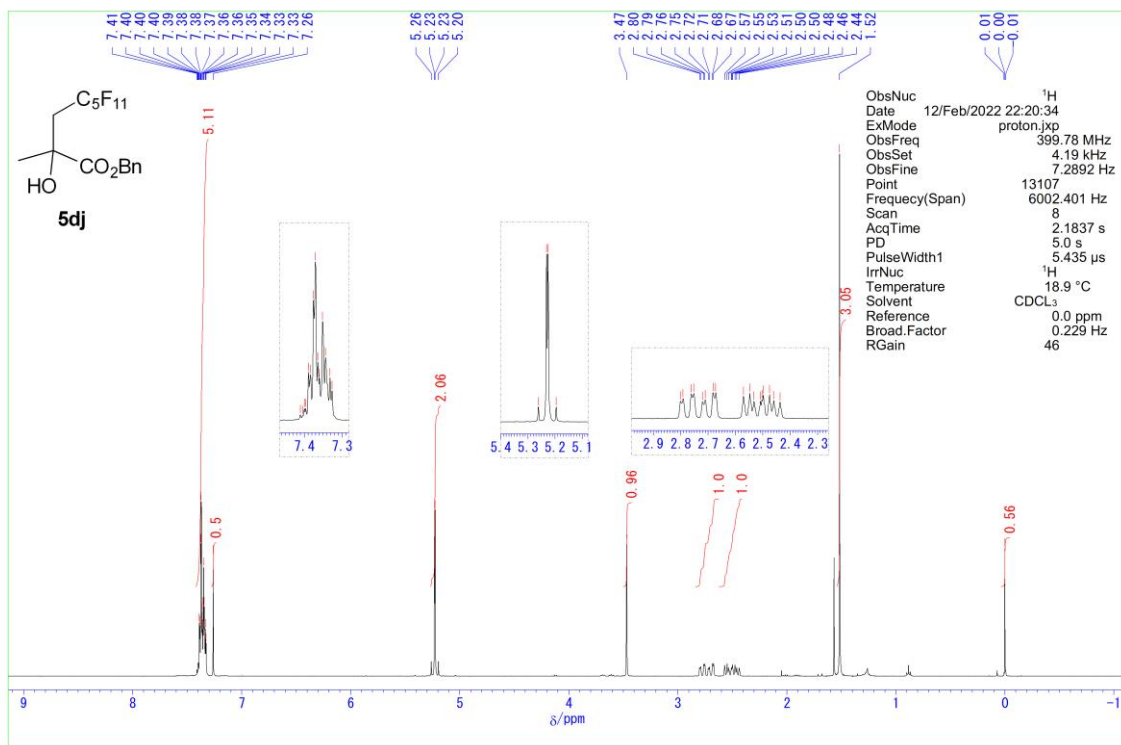

**5dj:**  $^{13}\text{C}$  NMR ( $\text{CDCl}_3$ , 151 MHz)

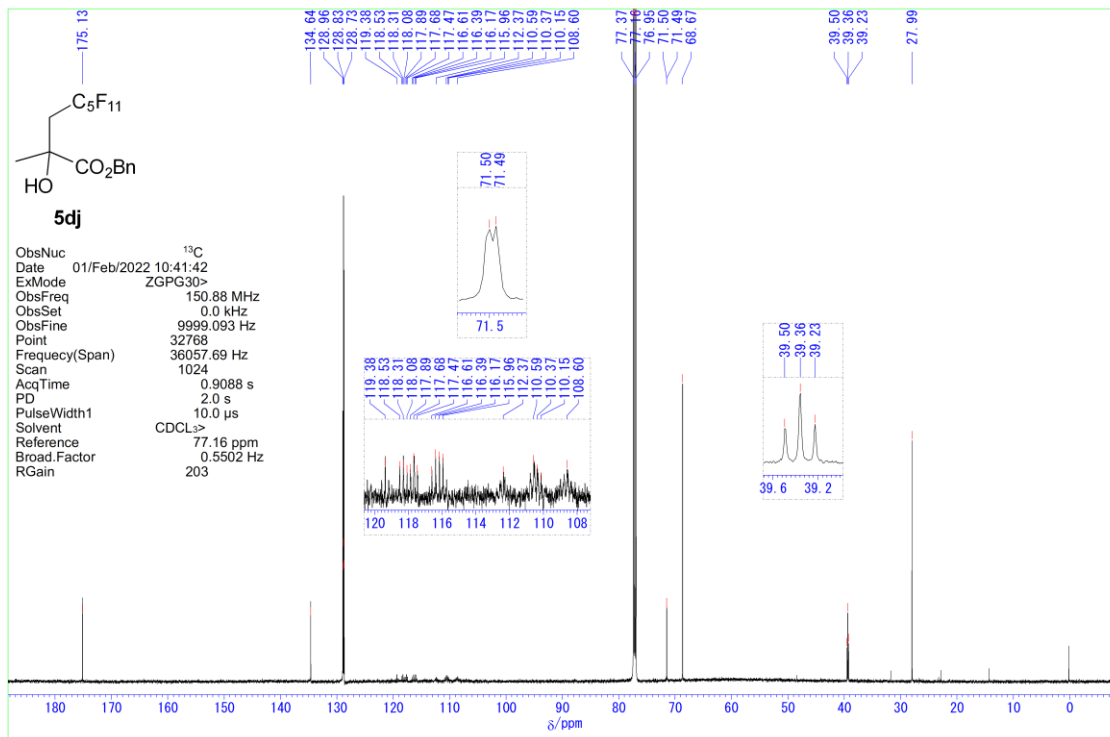

**5dj:**  $^{19}\text{F}$  NMR ( $\text{CDCl}_3$ , 376 MHz)

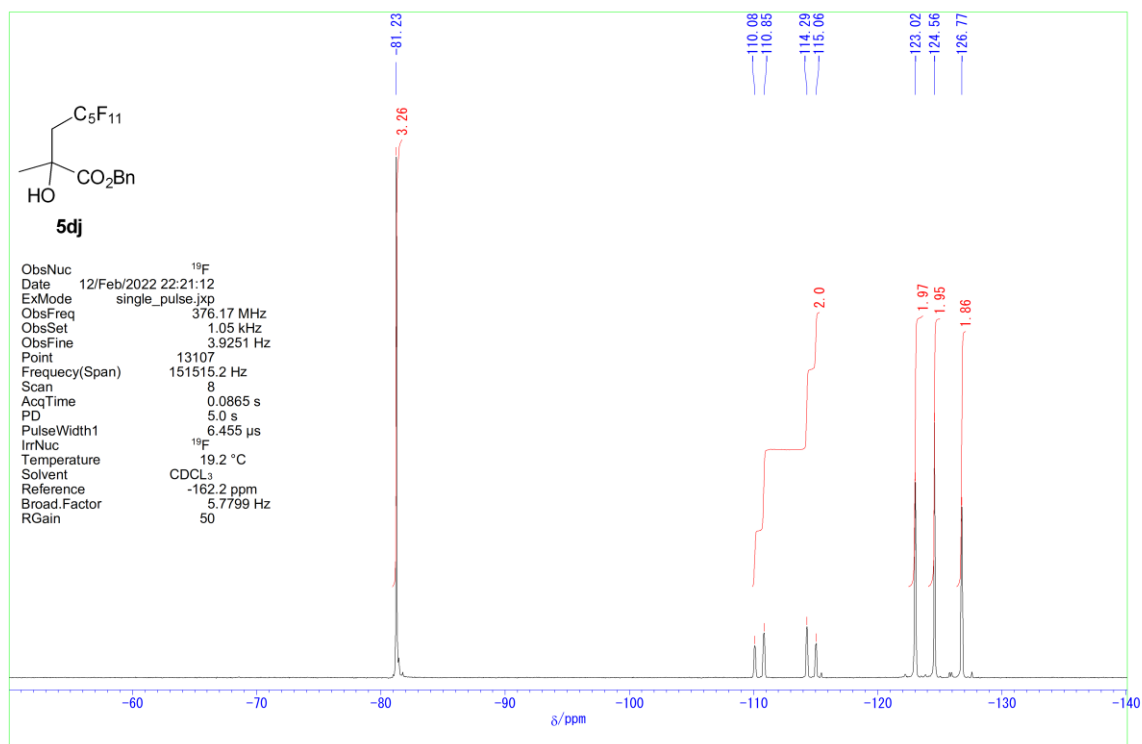

**5dk:**  $^1\text{H}$  NMR ( $\text{CDCl}_3$ , 400 MHz)

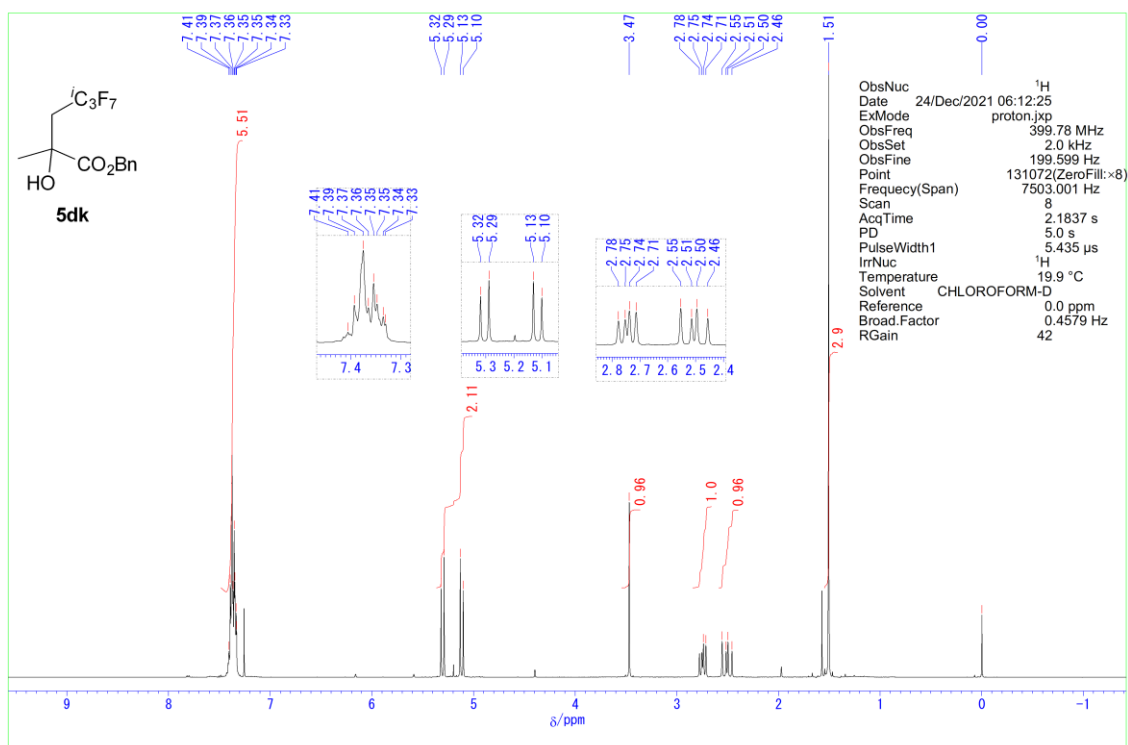

**5dk:**  $^{13}\text{C}$  NMR ( $\text{CDCl}_3$ , 151 MHz)

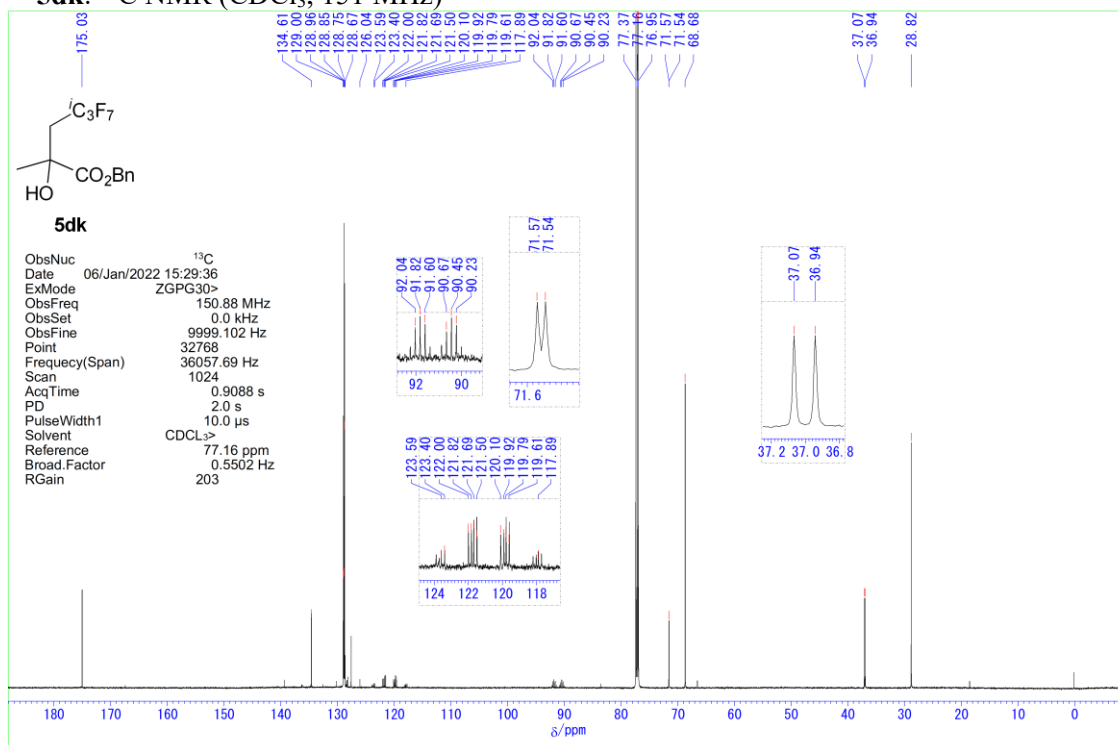

**5dk:**  $^{19}\text{F}$  NMR ( $\text{CDCl}_3$ , 376 MHz)

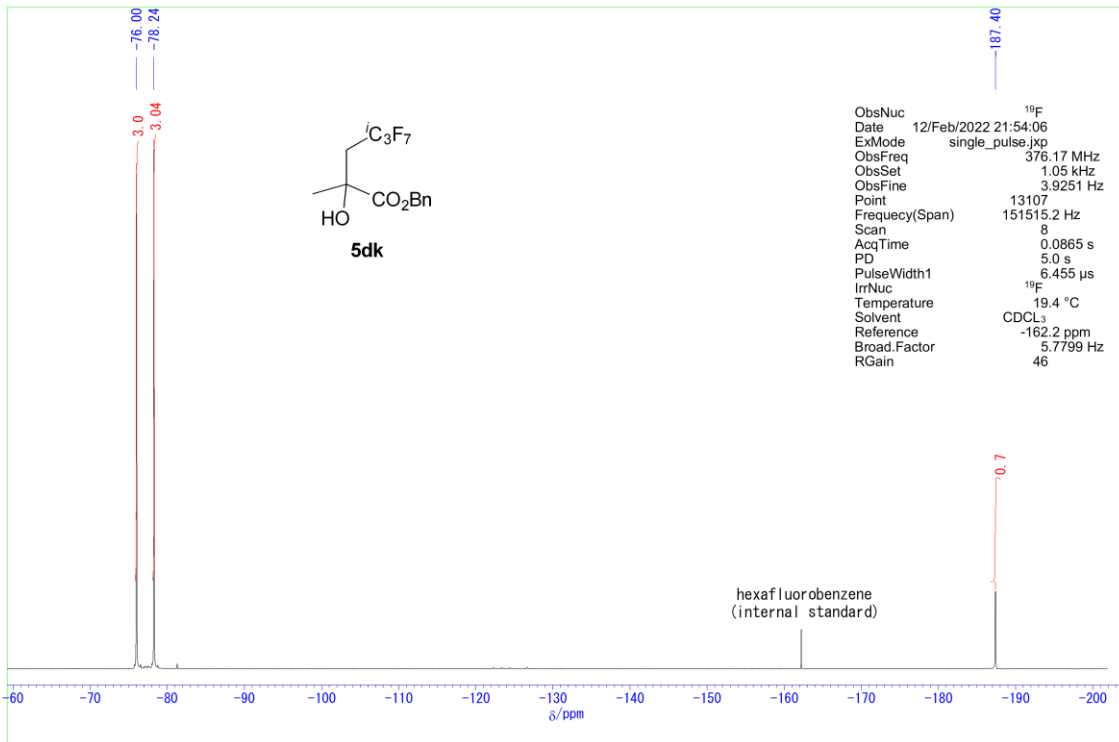

**5dl:**  $^1\text{H}$  NMR ( $\text{CDCl}_3$ , 400 MHz)

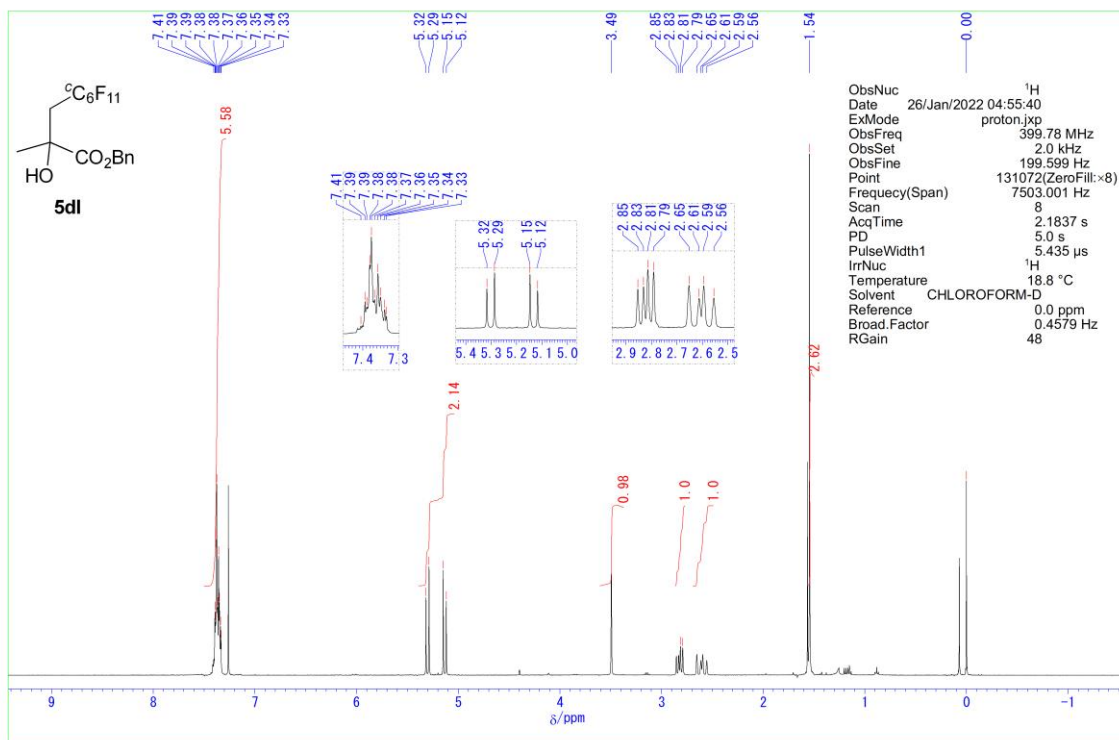



**5dl:**  $^{13}\text{C}$  NMR ( $\text{CDCl}_3$ , 151 MHz)

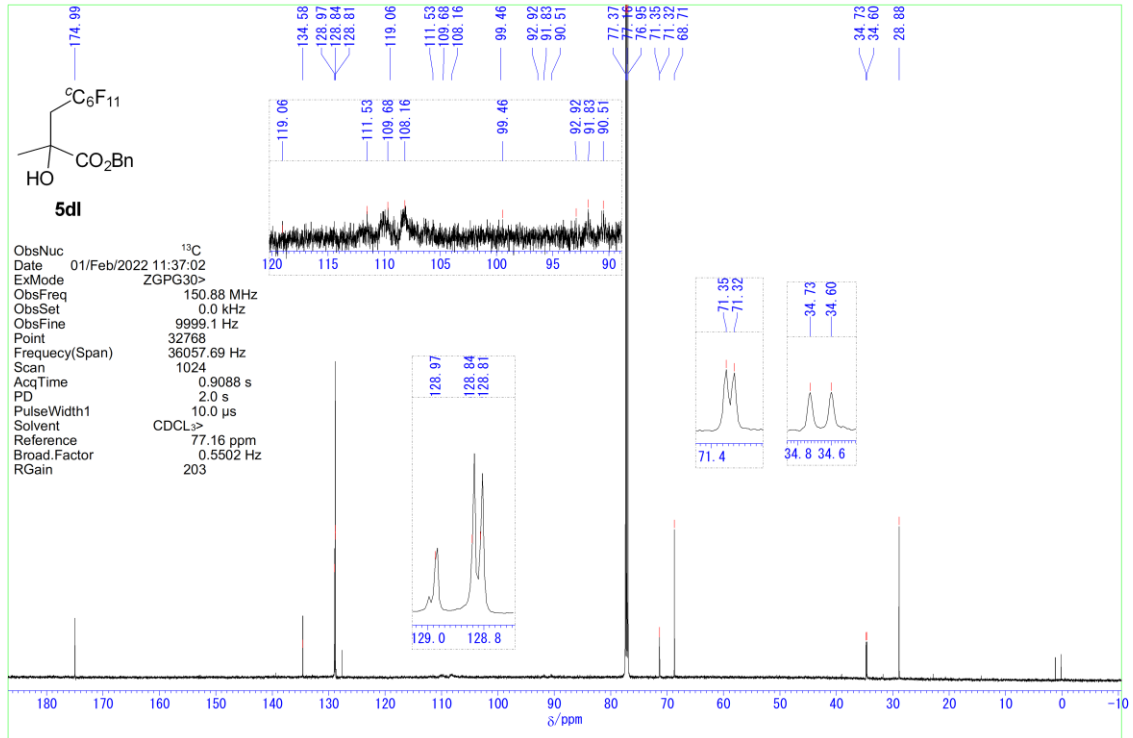

**5dl:**  $^{19}\text{F}$  NMR ( $\text{CDCl}_3$ , 376 MHz)

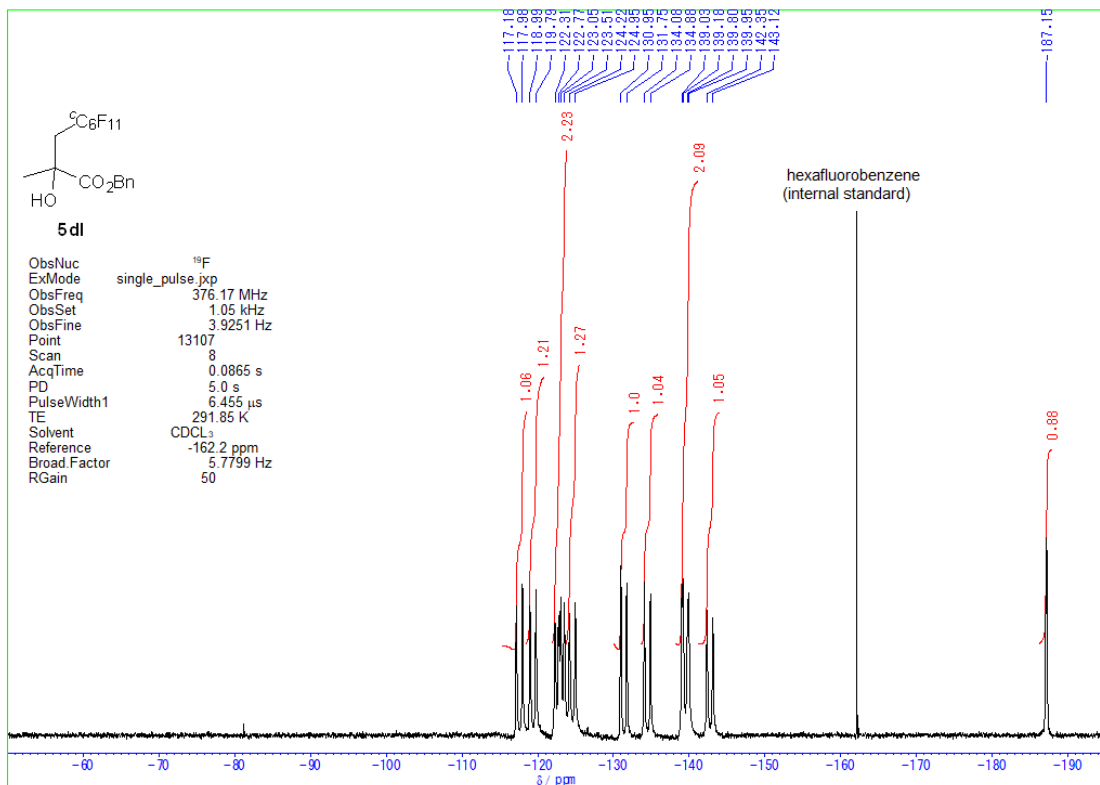

**5dm:**  $^1\text{H}$  NMR ( $\text{CDCl}_3$ , 400 MHz)

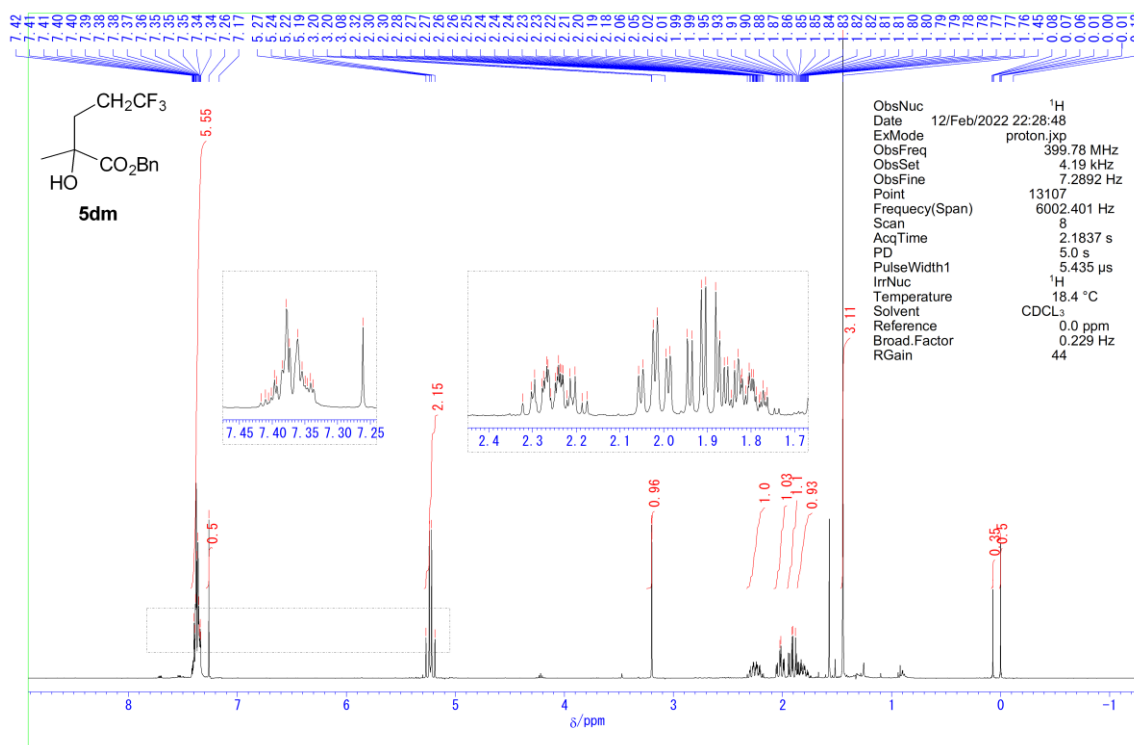

**5dm:**  $^{13}\text{C}$  NMR ( $\text{CDCl}_3$ , 151 MHz)

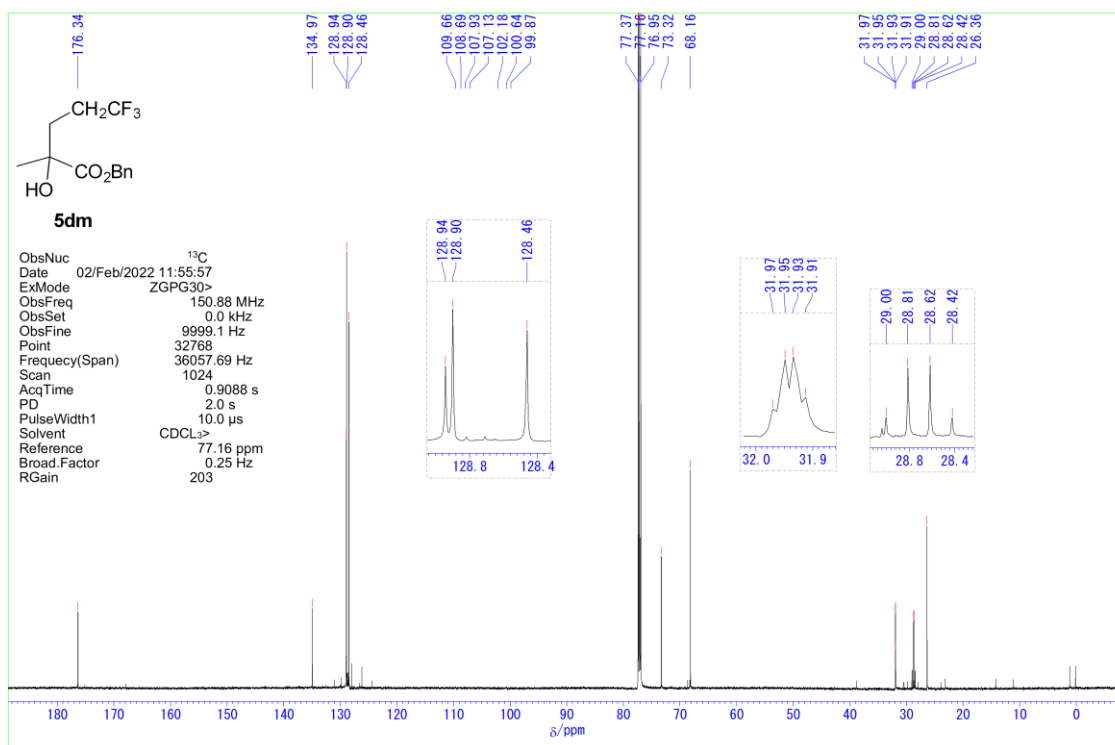

**5dm:**  $^{19}\text{F}$  NMR ( $\text{CDCl}_3$ , 376 MHz)

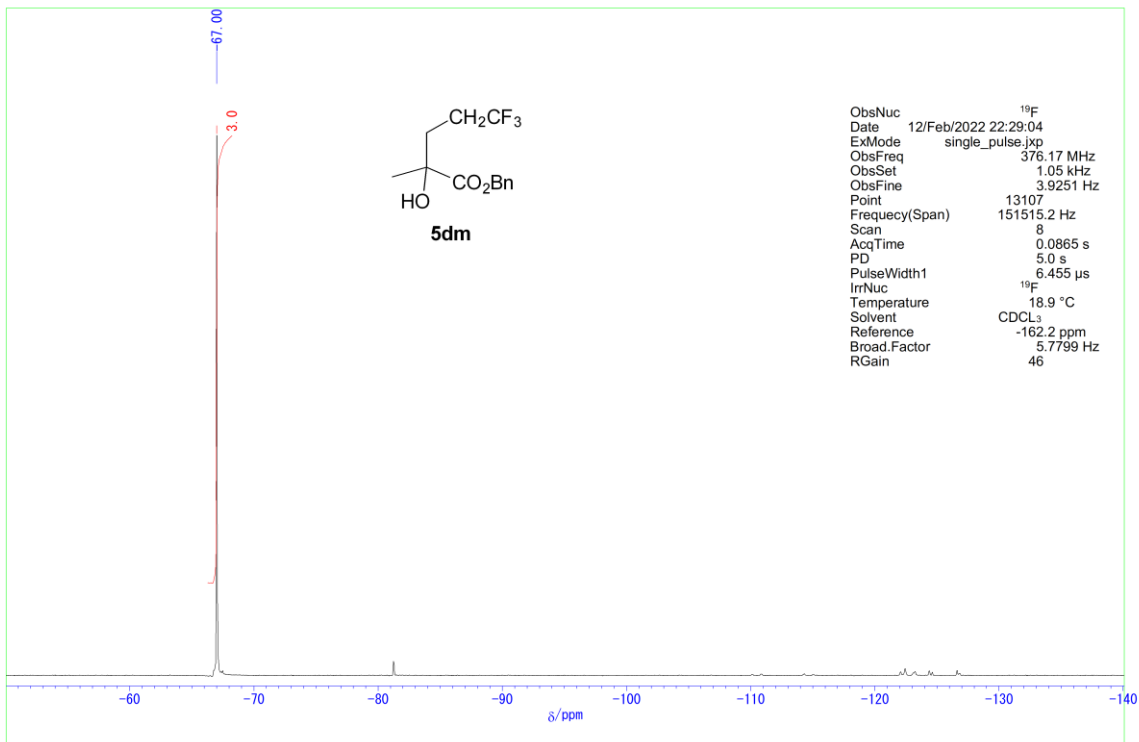

**5dn:**  $^1\text{H}$  NMR ( $\text{CDCl}_3$ , 400 MHz)

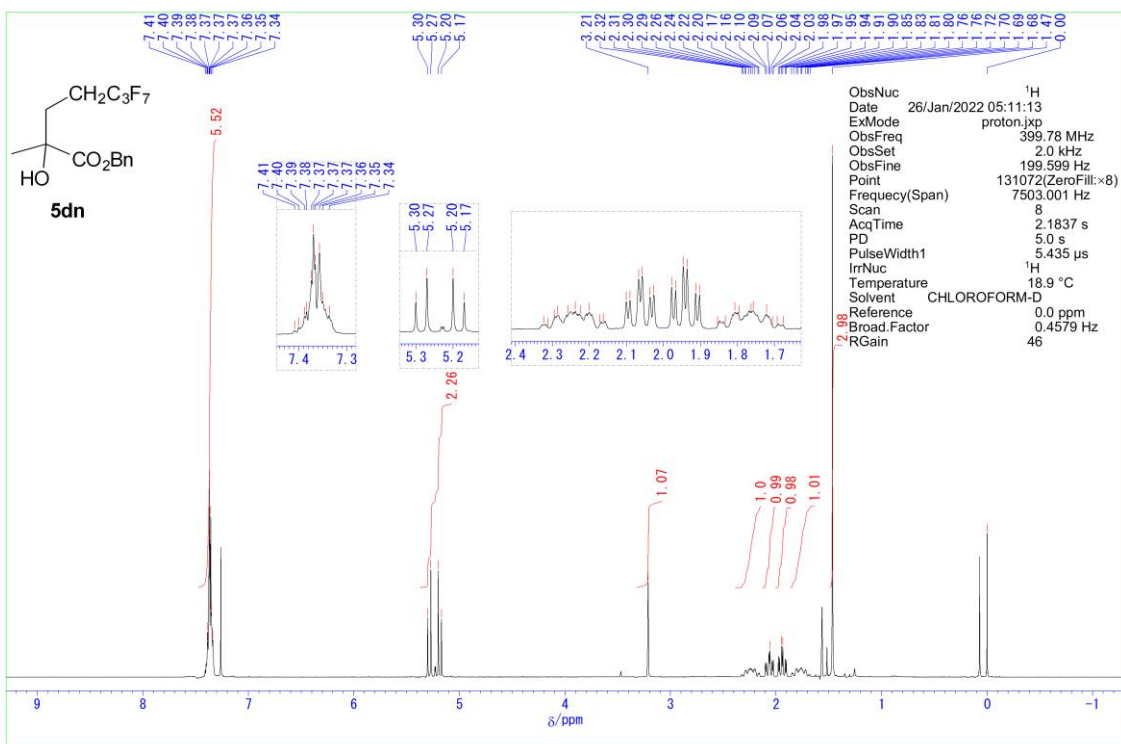

**5dn:**  $^{13}\text{C}$  NMR ( $\text{CDCl}_3$ , 151 MHz)

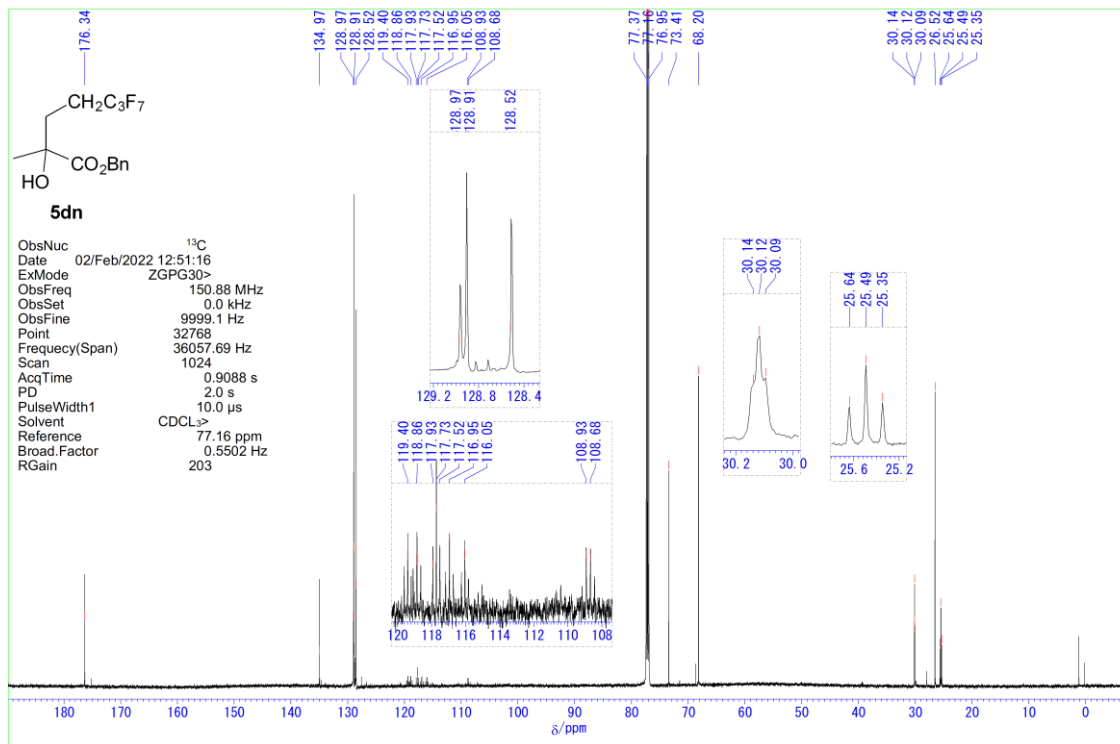

**5dn:**  $^{19}\text{F}$  NMR ( $\text{CDCl}_3$ , 376 MHz)

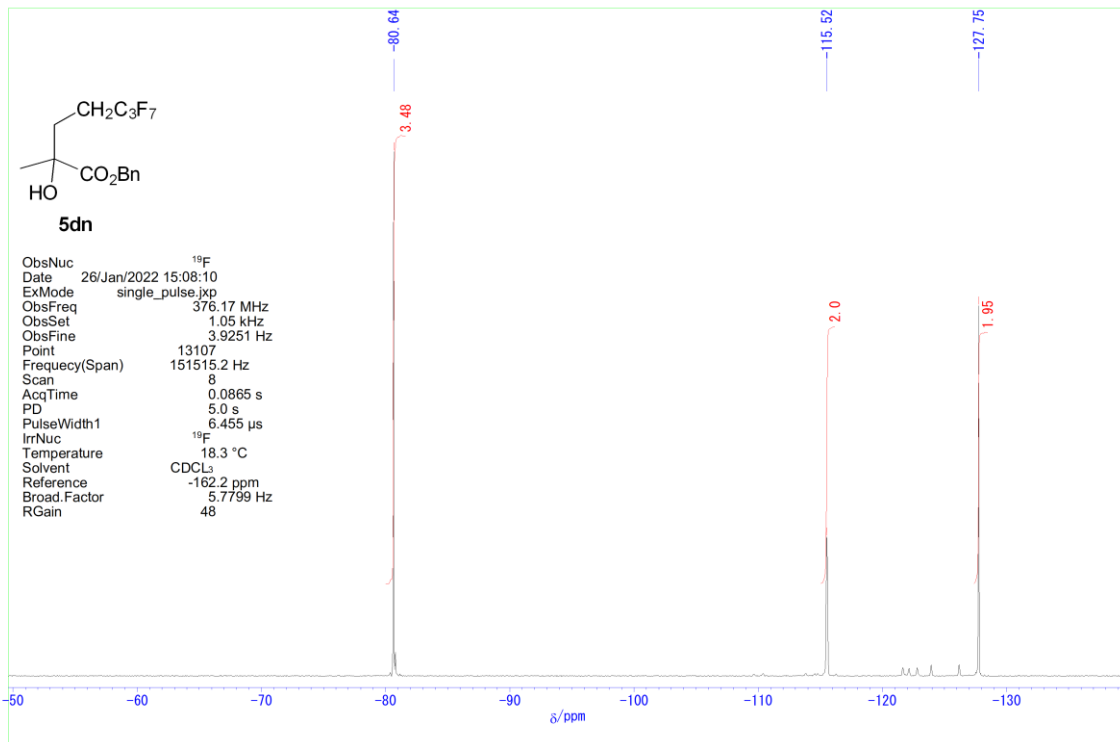



**7aa:**  $^{19}\text{F}$  NMR ( $\text{CDCl}_3$ , 471 MHz)

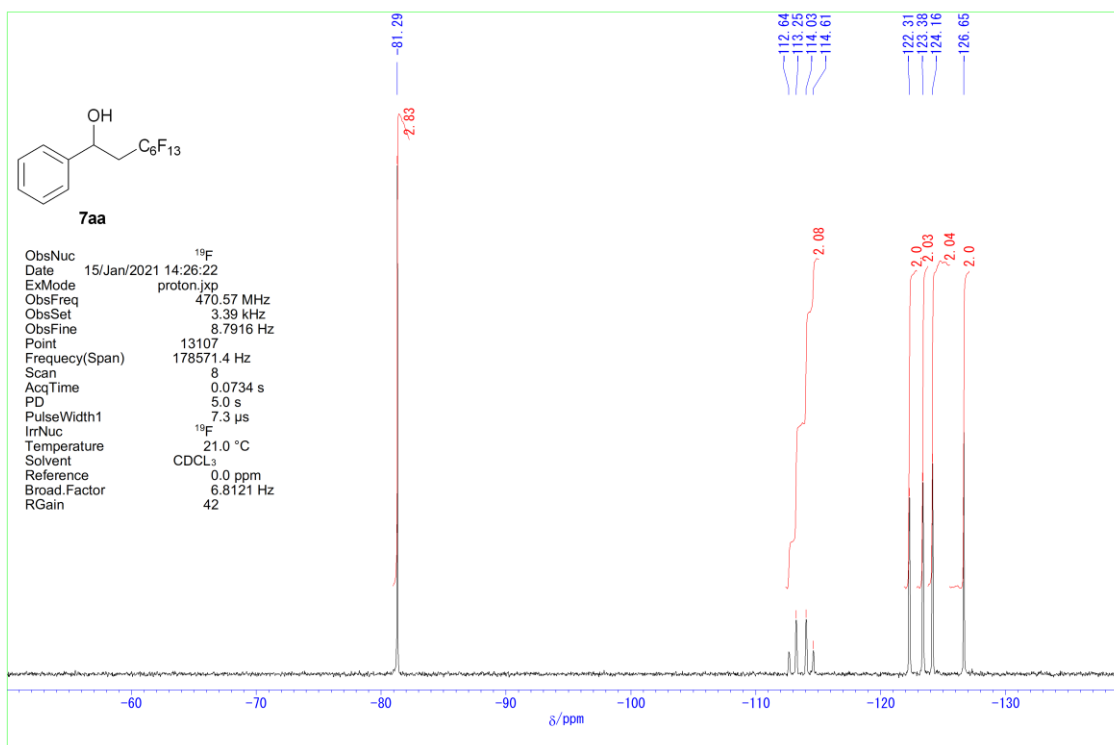

**7ba:**  $^1\text{H}$  NMR ( $\text{CDCl}_3$ , 400 MHz)

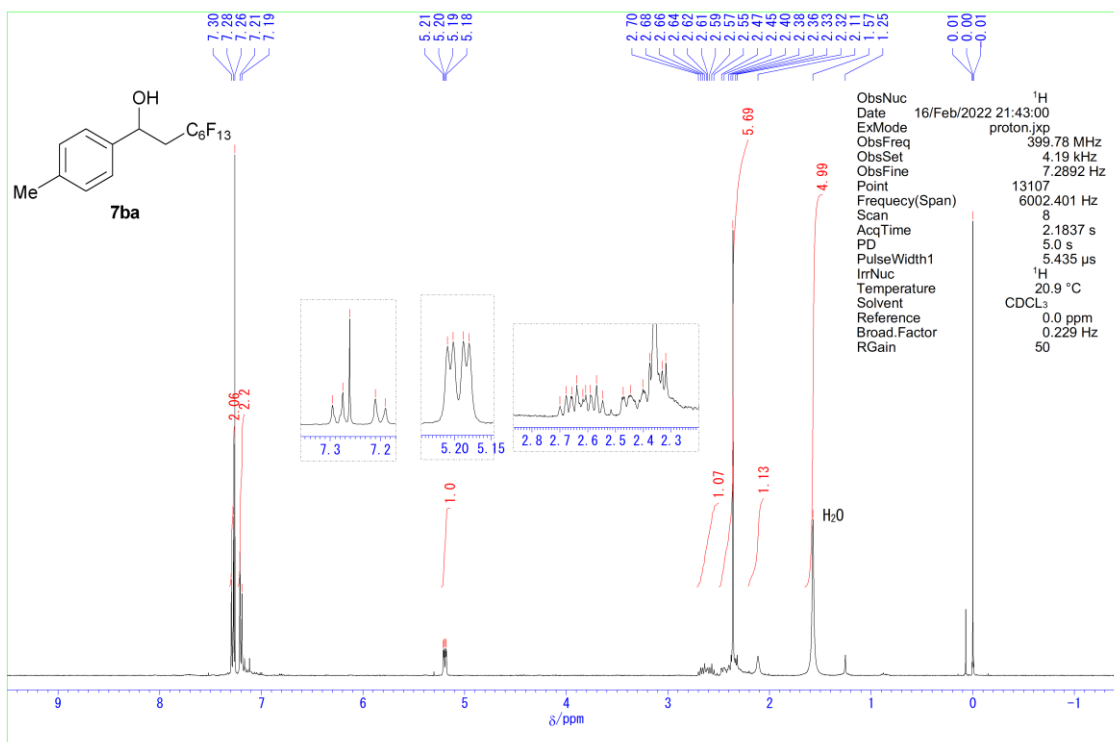

**7ba:**  $^{13}\text{C}$  NMR ( $\text{CDCl}_3$ , 151 MHz)

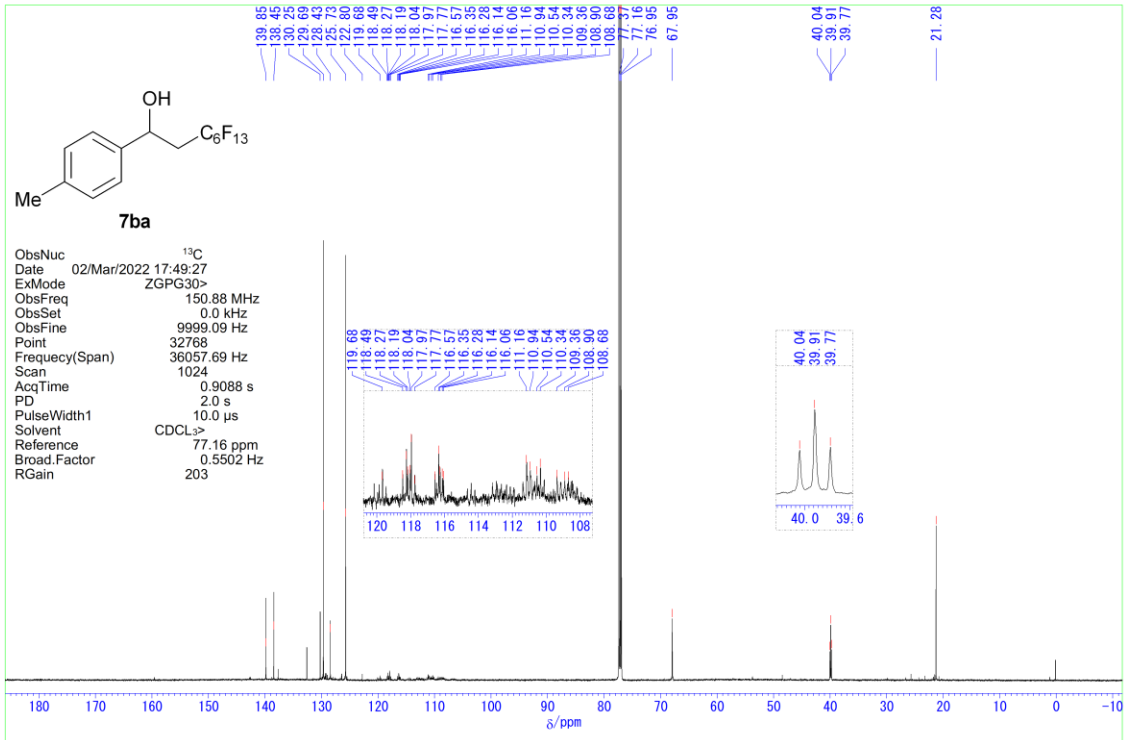

**7ba:**  $^{19}\text{F}$  NMR ( $\text{CDCl}_3$ , 376 MHz)

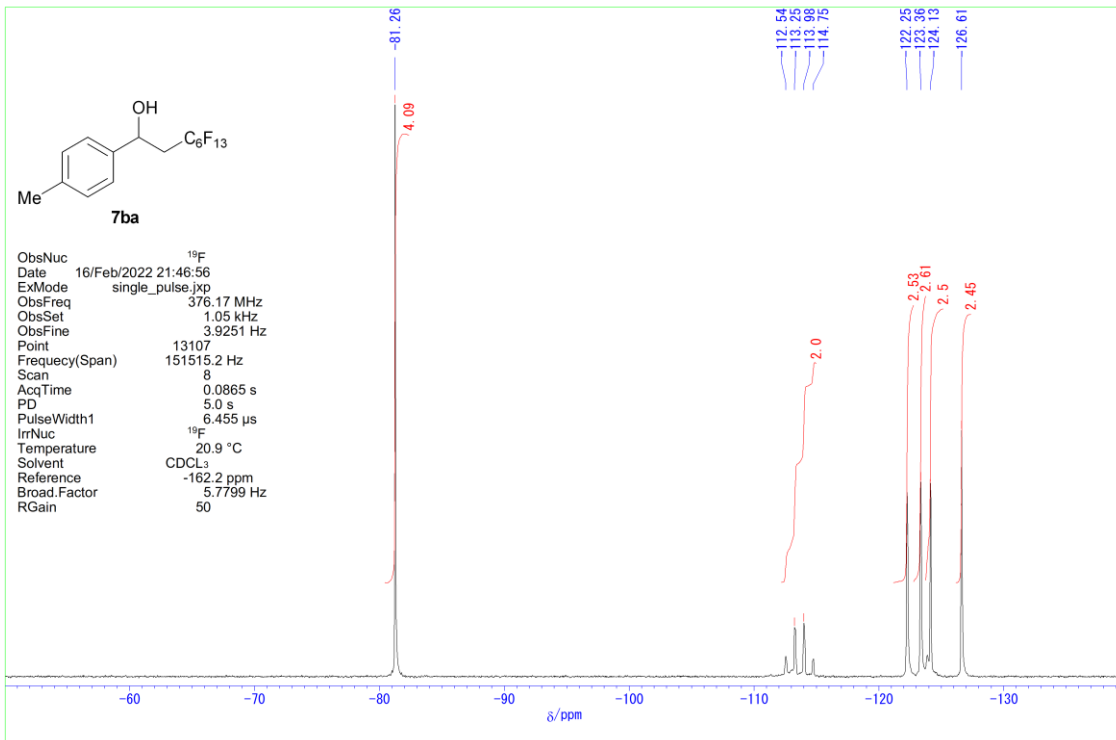

**7ca:**  $^1\text{H}$  NMR ( $\text{CDCl}_3$ , 400 MHz)

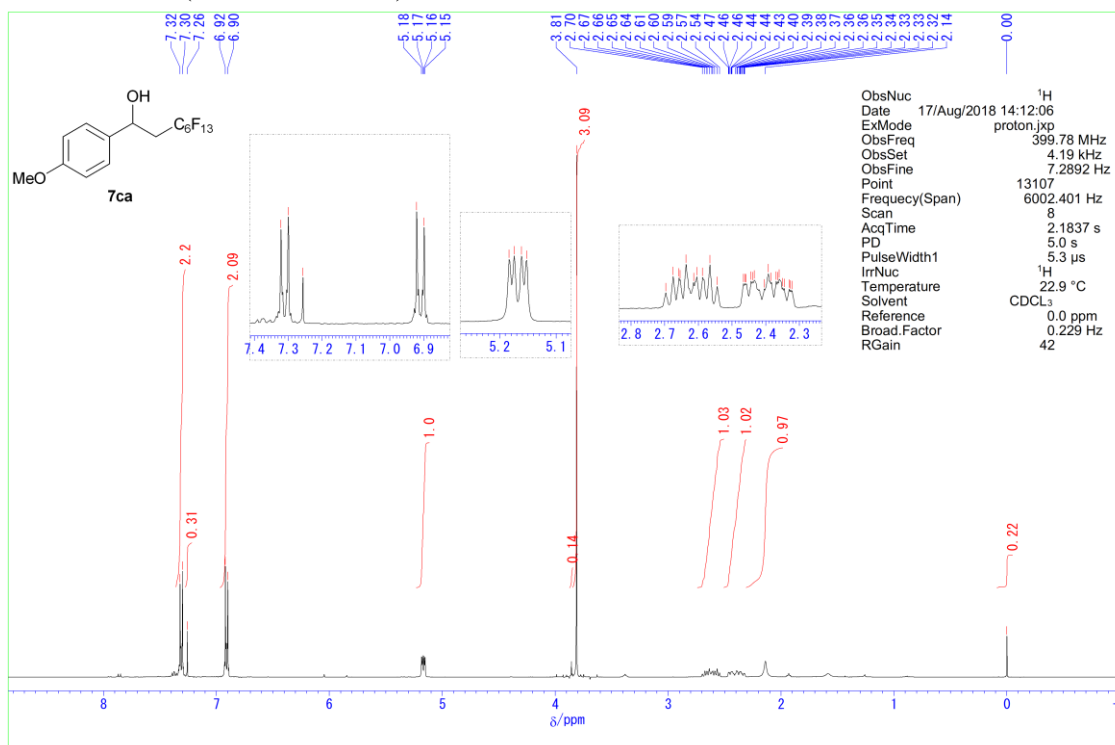

**7ca:**  $^{13}\text{C}$  NMR ( $\text{CDCl}_3$ , 126 MHz)

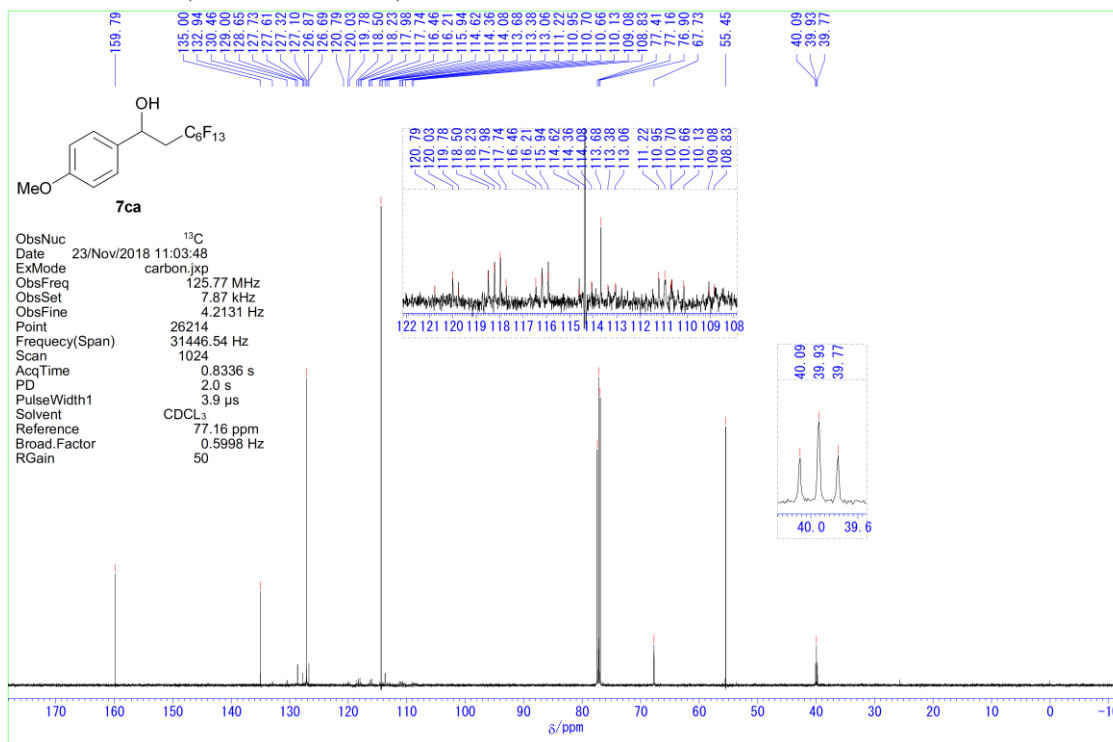



**7ca:**  $^{19}\text{F}$  NMR ( $\text{CDCl}_3$ , 376 MHz)

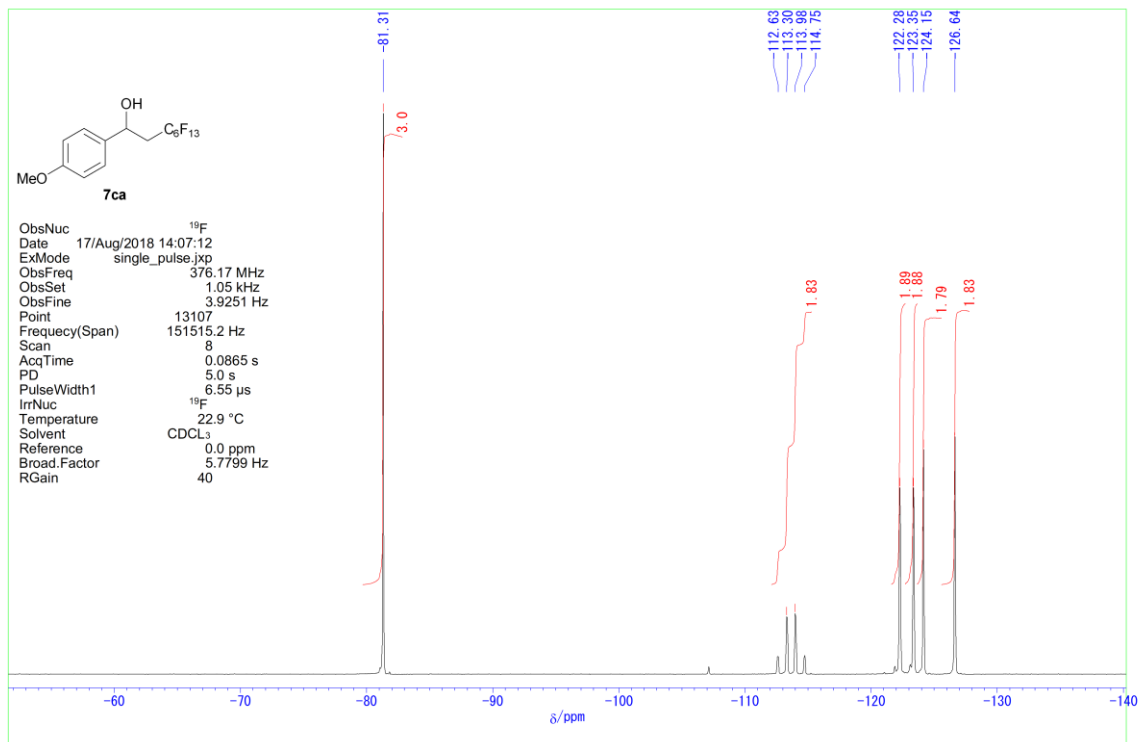

**7da:**  $^1\text{H}$  NMR ( $\text{CDCl}_3$ , 500 MHz)

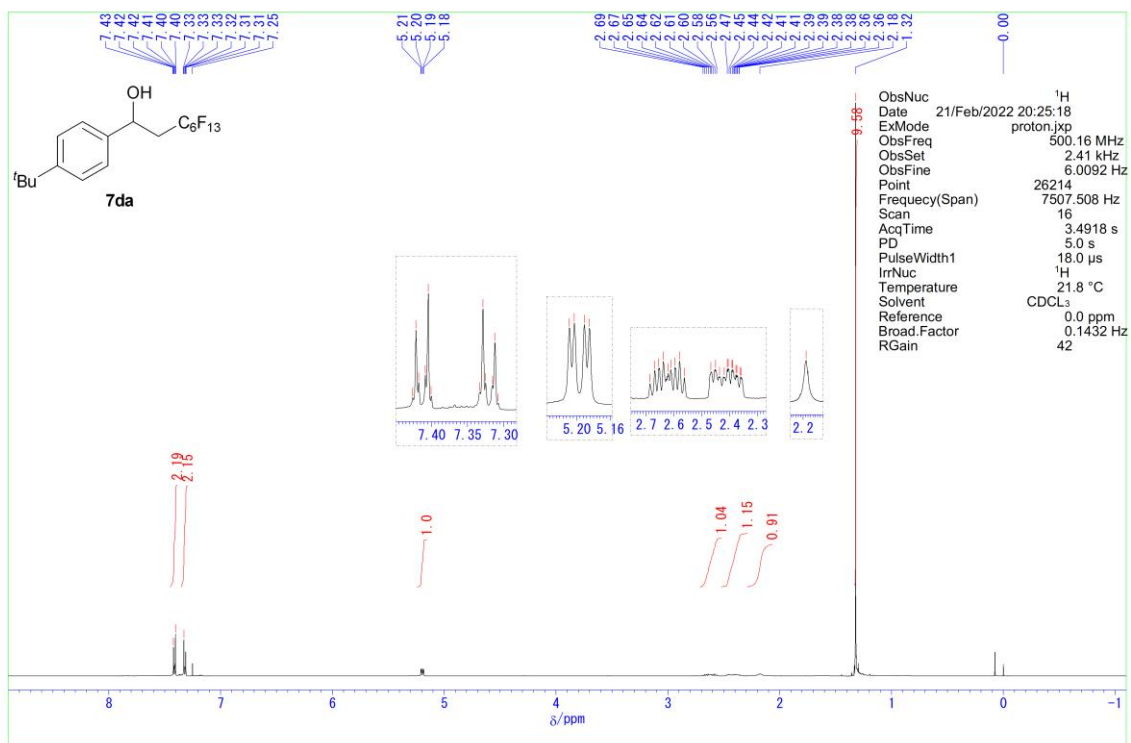

**7da:**  $^{13}\text{C}$  NMR ( $\text{CDCl}_3$ , 151 MHz)

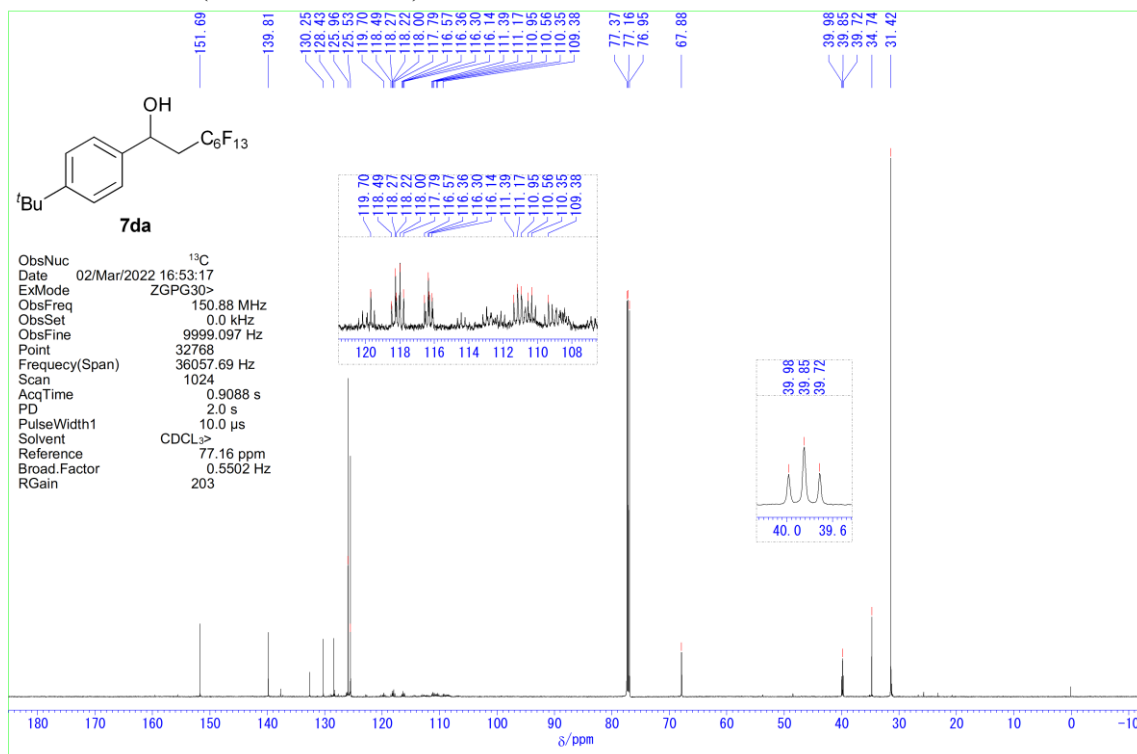

**7da:**  $^{19}\text{F}$  NMR ( $\text{CDCl}_3$ , 471 MHz)

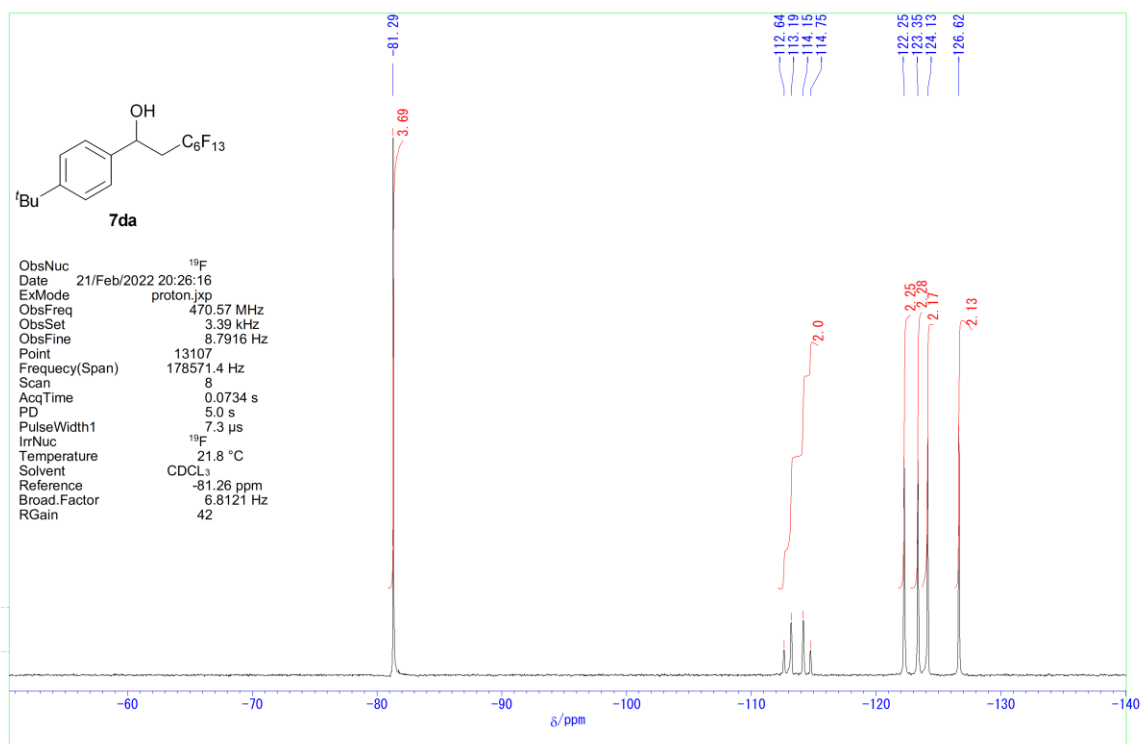

**7ea:**  $^1\text{H}$  NMR ( $\text{CDCl}_3$ , 400 MHz)

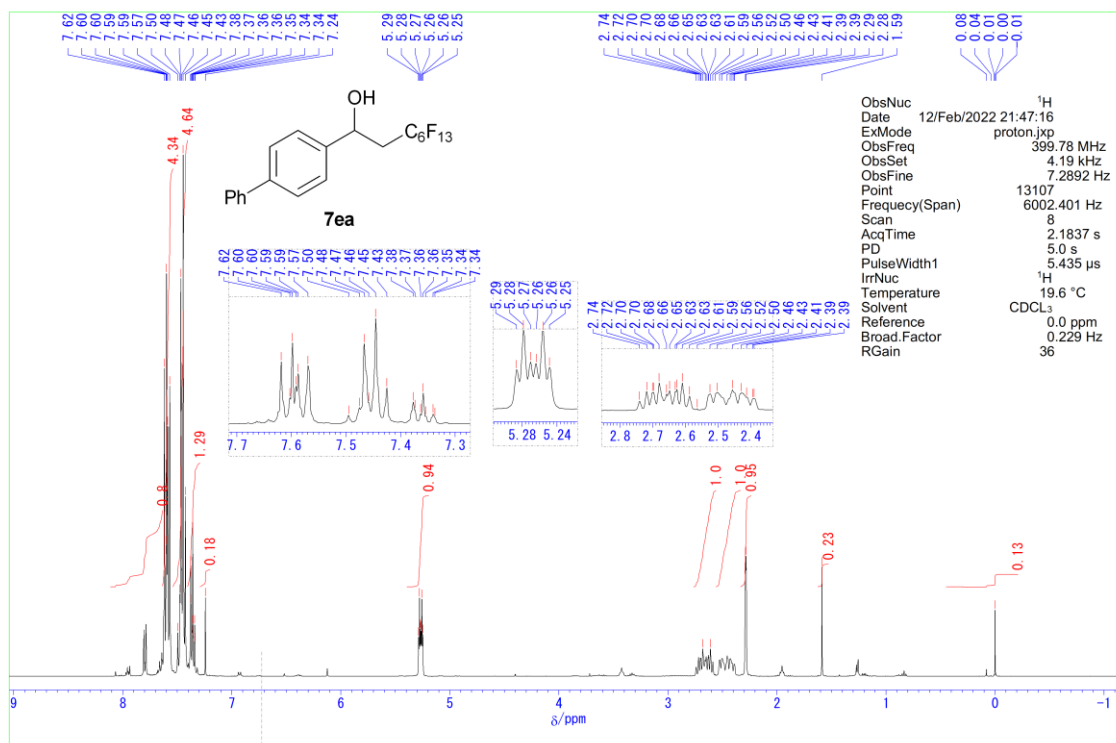

**7ea:**  $^{13}\text{C}$  NMR ( $\text{CDCl}_3$ , 151 MHz)

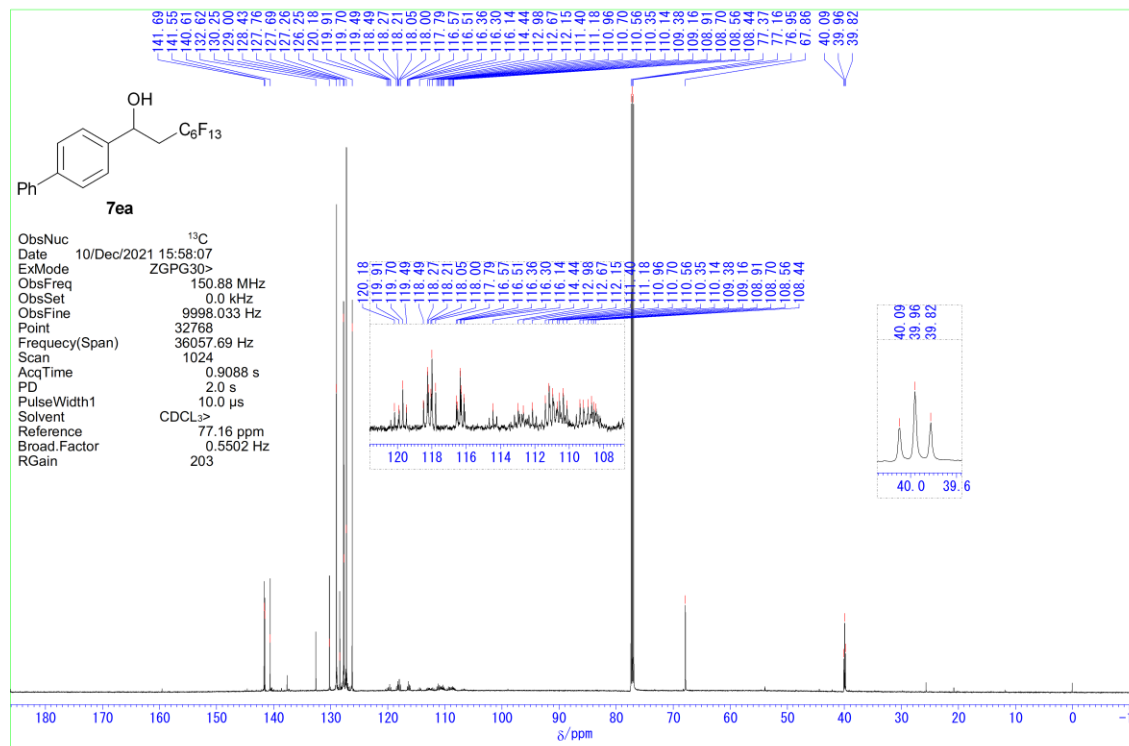

**7ea:**  $^{19}\text{F}$  NMR ( $\text{CDCl}_3$ , 376 MHz)

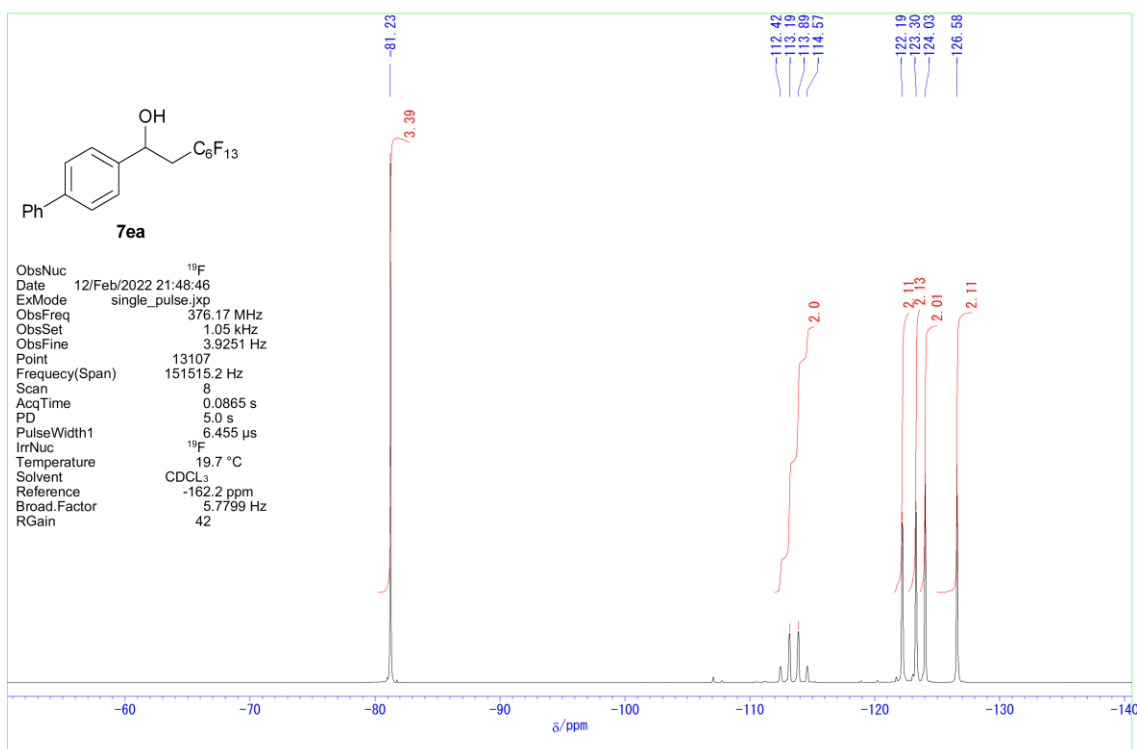

**7fa:**  $^1\text{H}$  NMR ( $\text{CDCl}_3$ , 500 MHz)

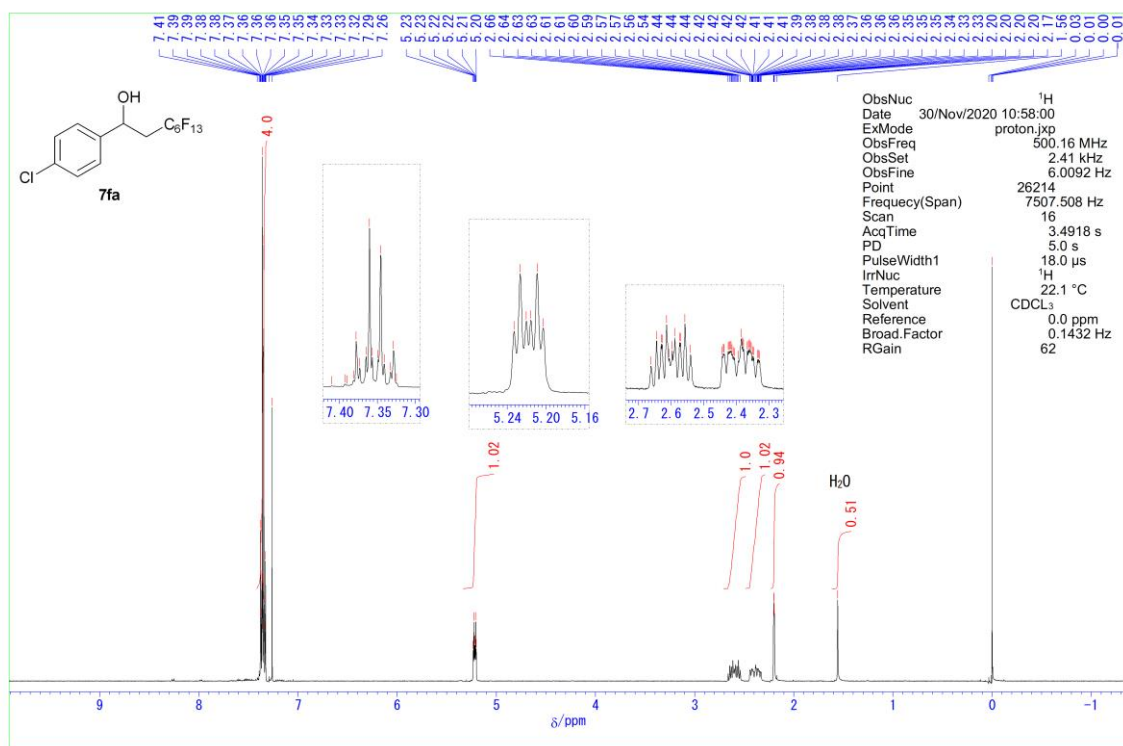

**7fa:**  $^{13}\text{C}$  NMR ( $\text{CDCl}_3$ , 151 MHz)

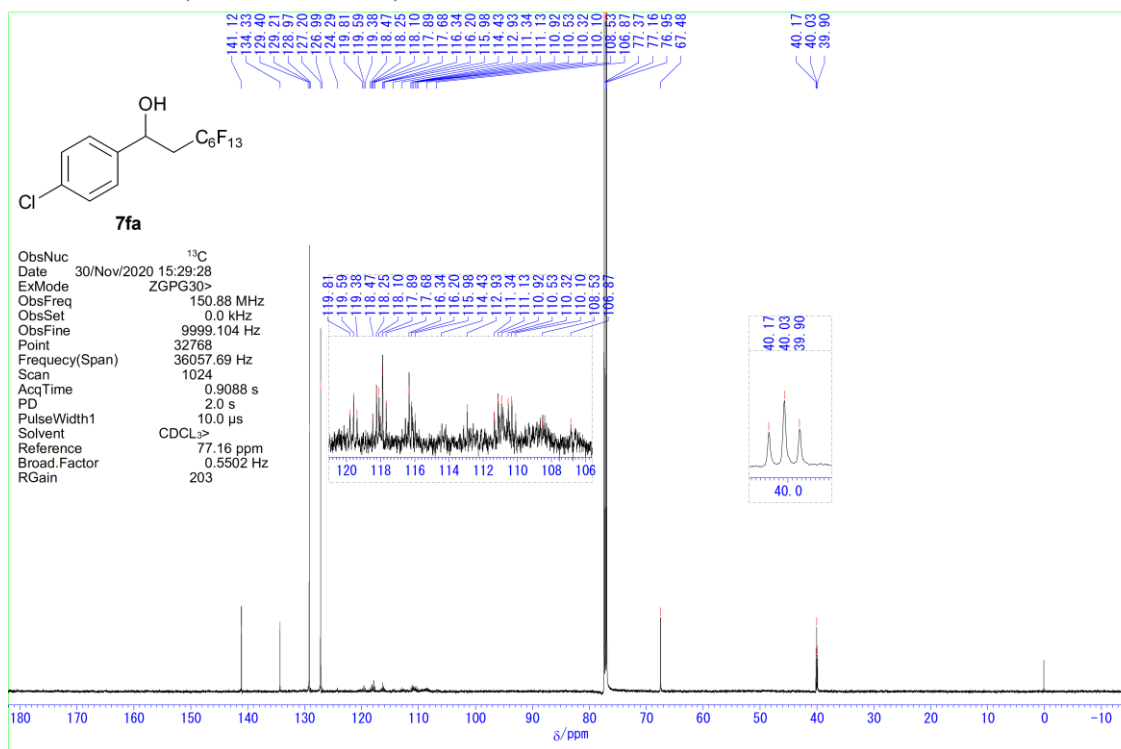

**7fa:**  $^{19}\text{F}$  NMR ( $\text{CDCl}_3$ , 471 MHz)

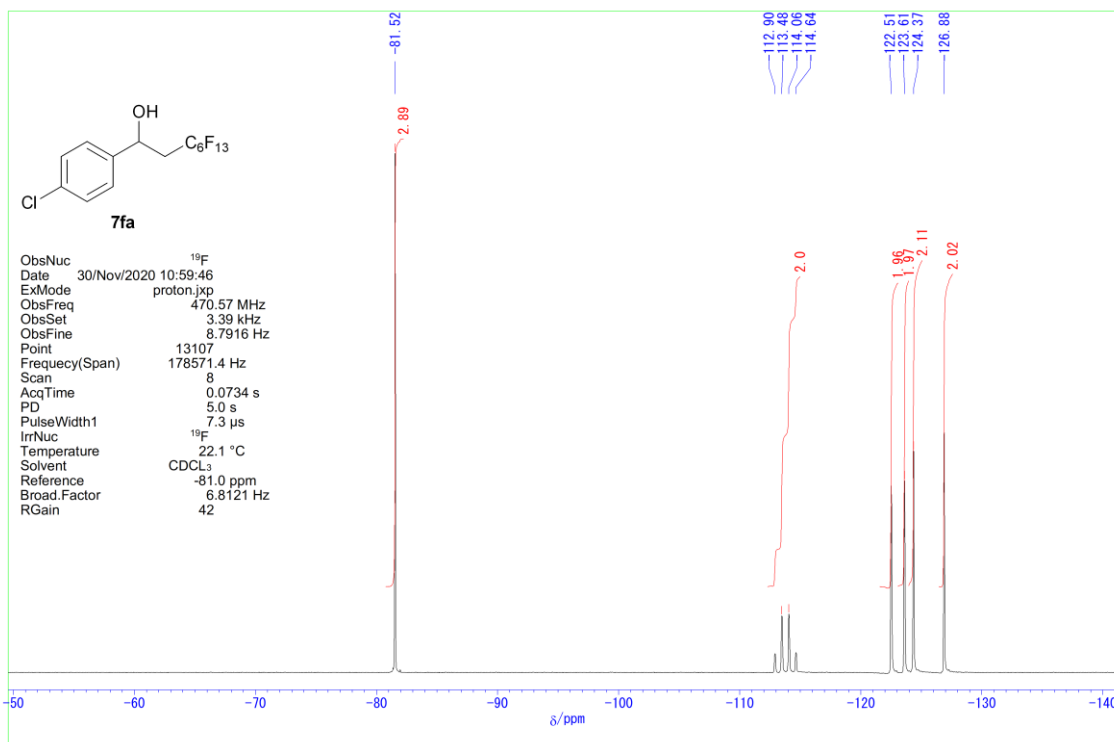

**7ga:**  $^1\text{H}$  NMR ( $\text{CDCl}_3$ , 500 MHz)

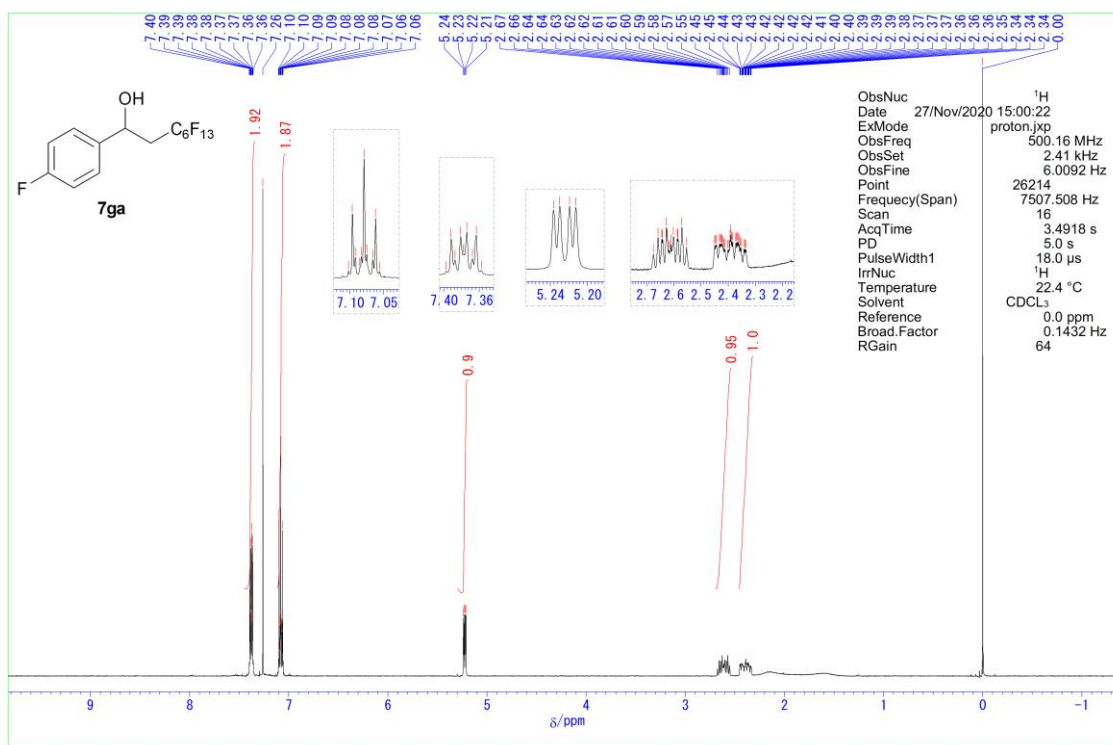

**7ga:**  $^{13}\text{C}$  NMR ( $\text{CDCl}_3$ , 151 MHz)

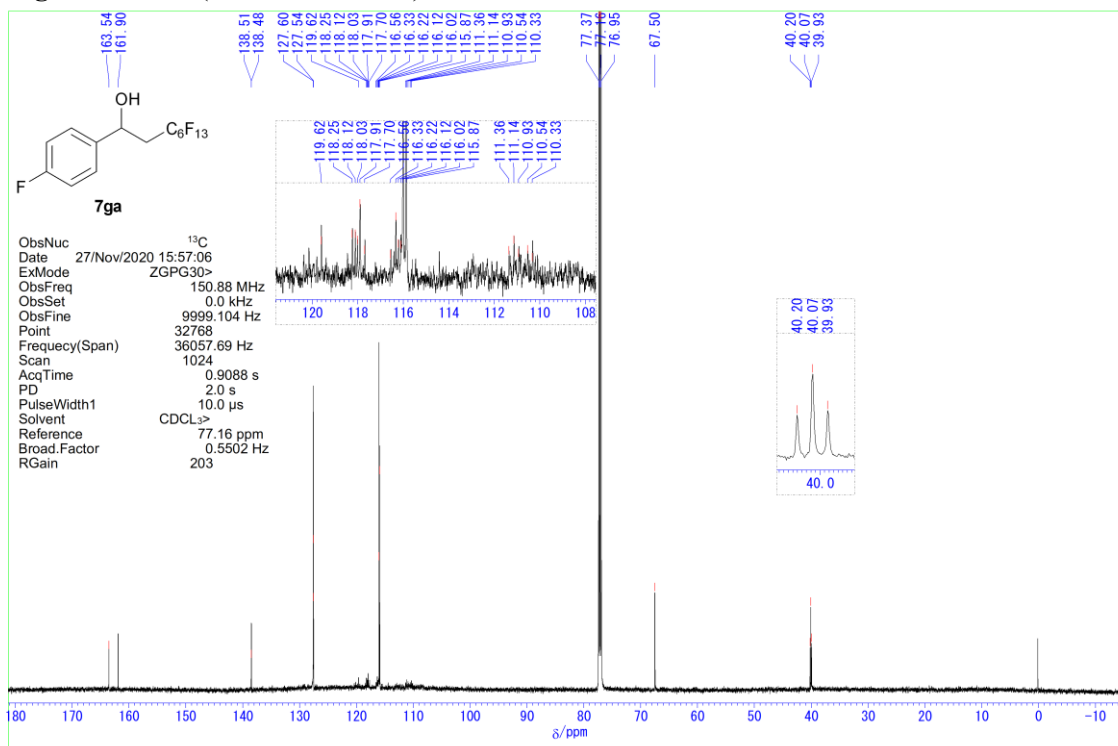

**7ga:**  $^{19}\text{F}$  NMR ( $\text{CDCl}_3$ , 471 MHz)

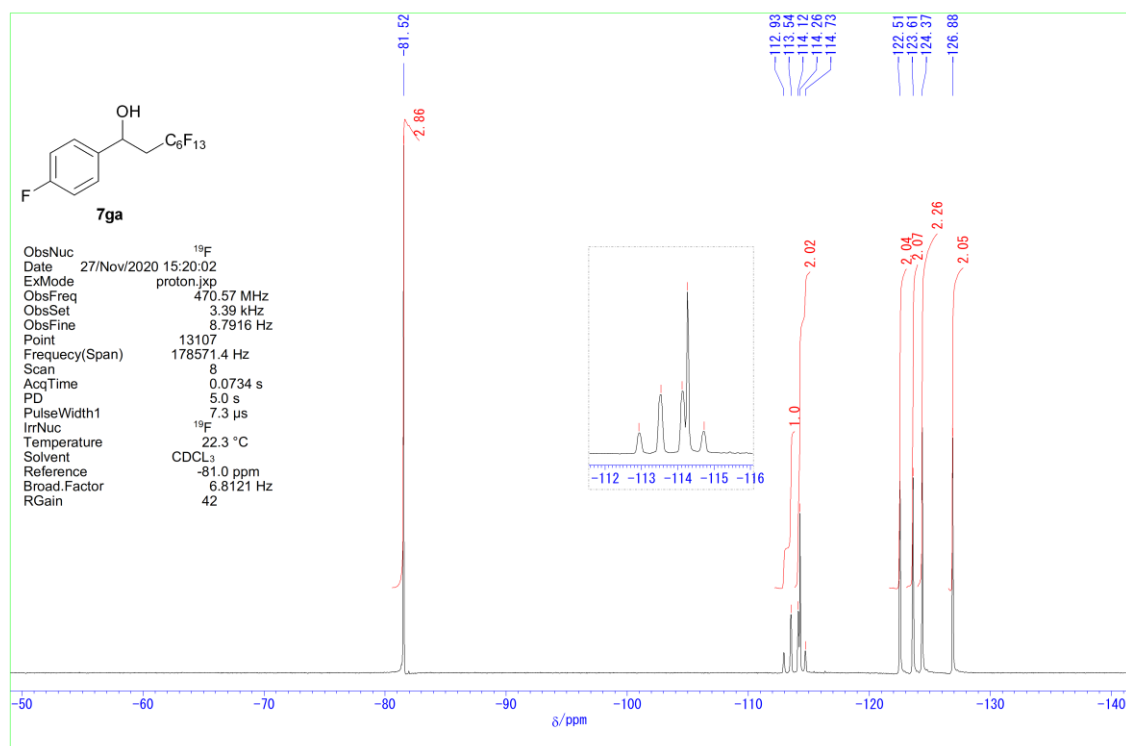

**7ha:**  $^1\text{H}$  NMR ( $\text{CDCl}_3$ , 500 MHz)

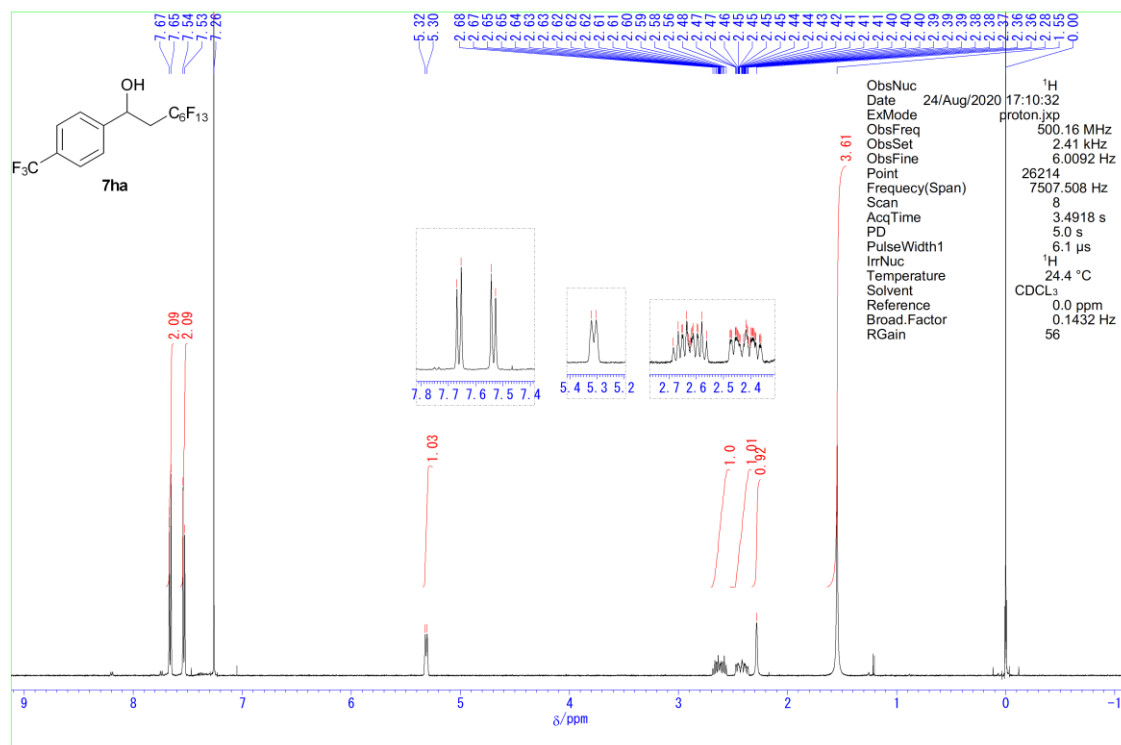

**7ha:**  $^{13}\text{C}$  NMR ( $\text{CDCl}_3$ , 151 MHz)

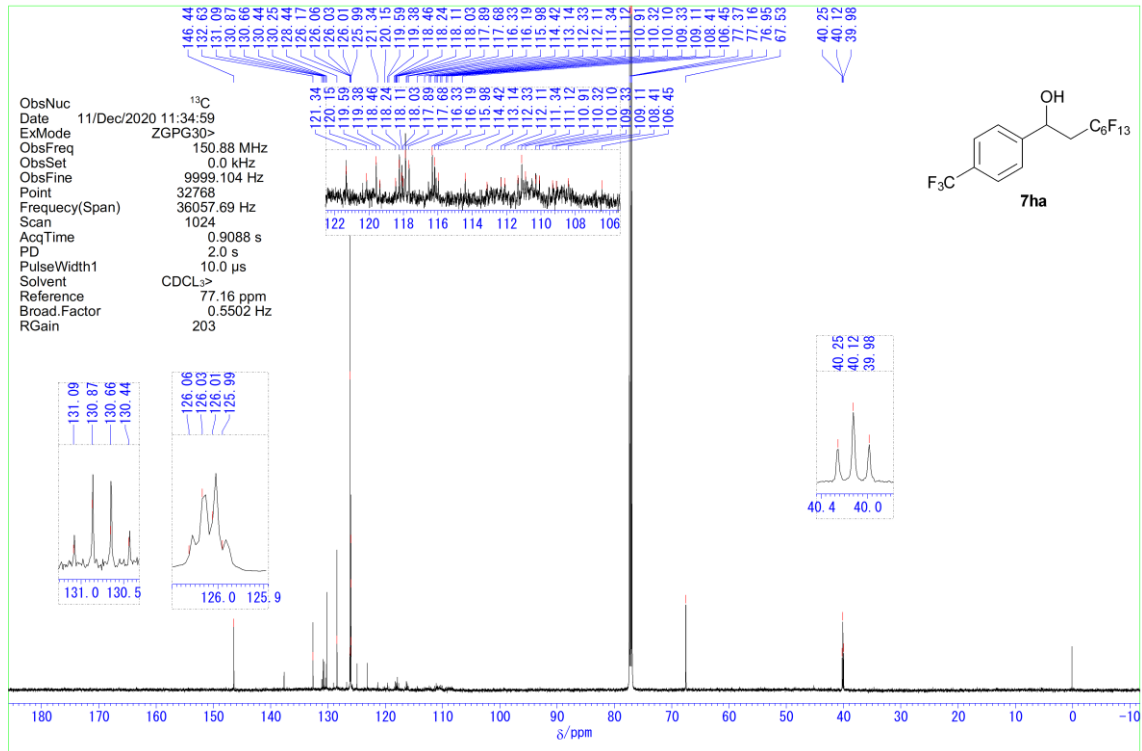

**7ha:**  $^{19}\text{F}$  NMR ( $\text{CDCl}_3$ , 471 MHz)

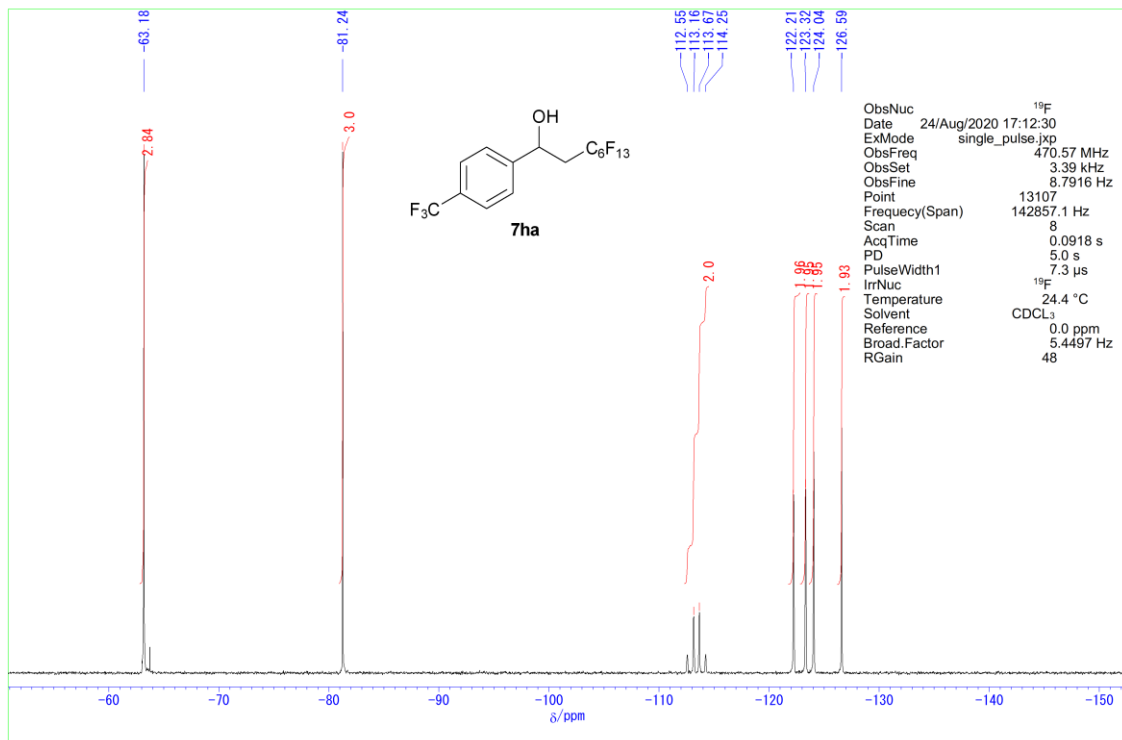



**7ia:**  $^1\text{H}$  NMR ( $\text{CDCl}_3$ , 400 MHz)

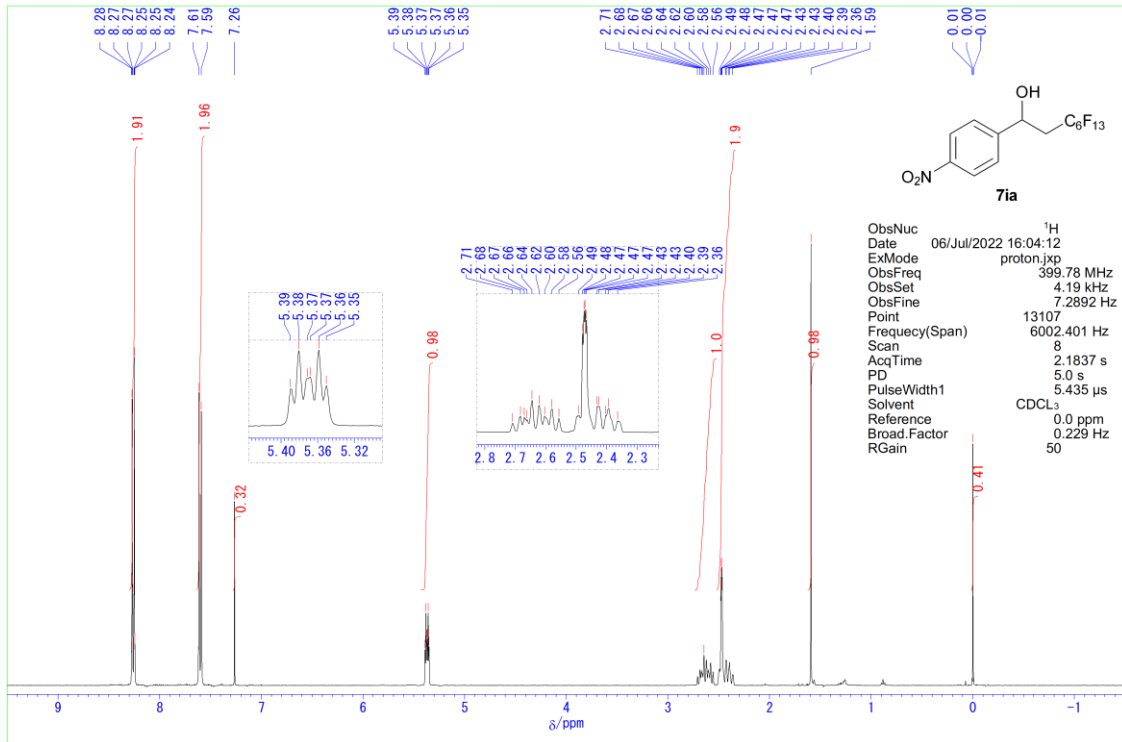

**7ia:**  $^{13}\text{C}$  NMR ( $\text{CDCl}_3$ , 151 MHz)

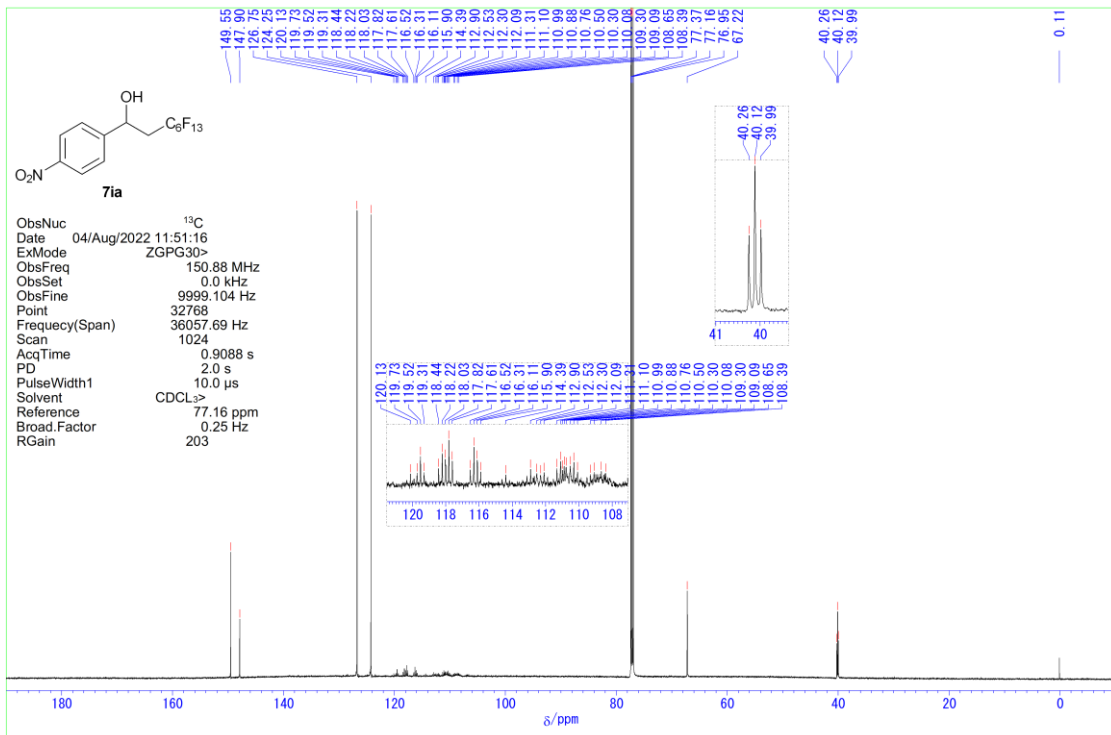

**7ia:**  $^{19}\text{F}$  NMR ( $\text{CDCl}_3$ , 471 MHz)

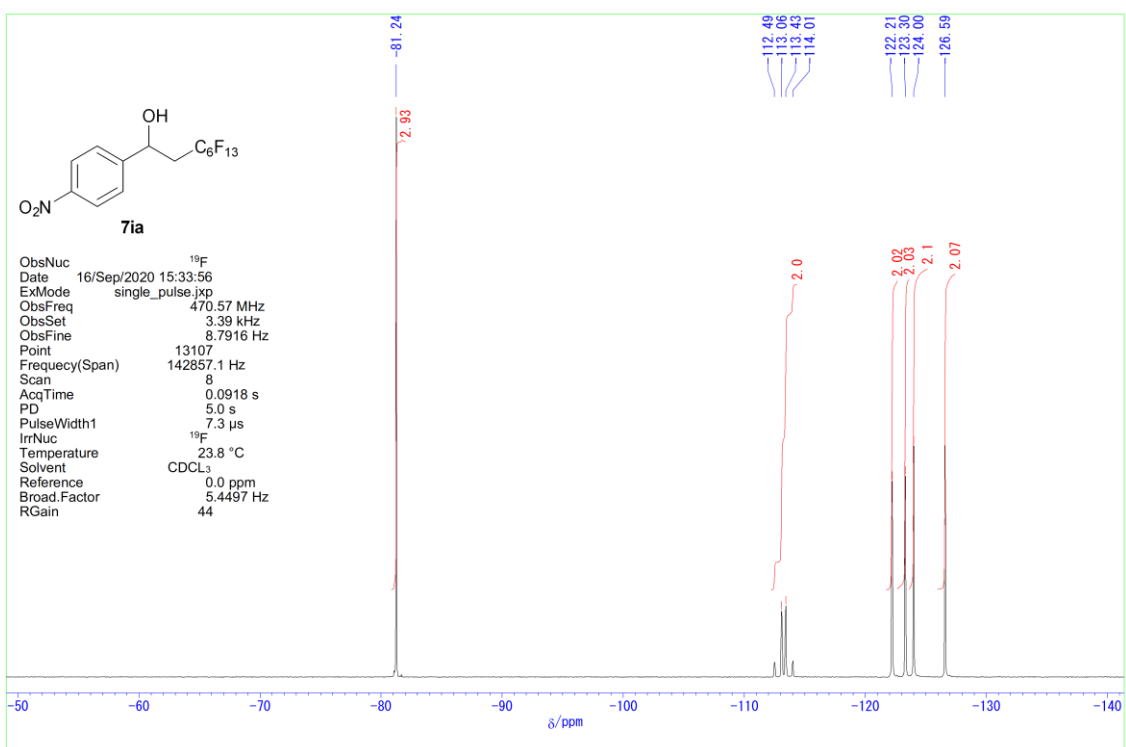

**7ja:**  $^1\text{H}$  NMR ( $\text{CDCl}_3$ , 500 MHz)

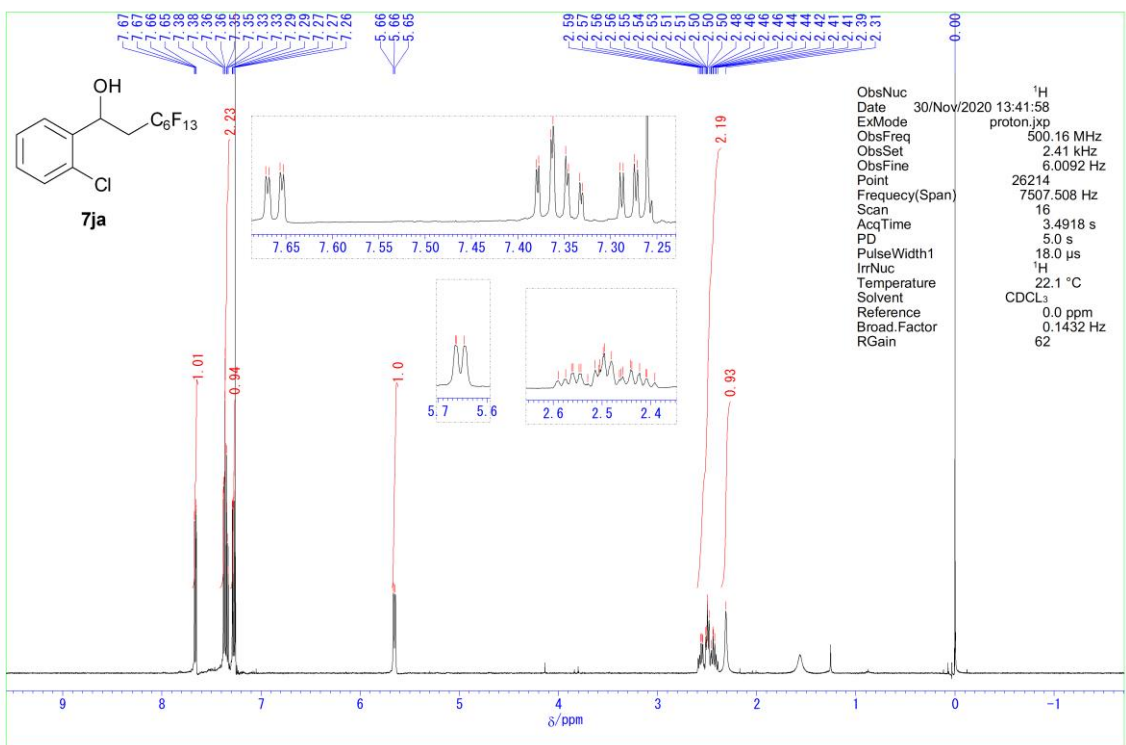

**7ja:**  $^{13}\text{C}$  NMR ( $\text{CDCl}_3$ , 151 MHz)

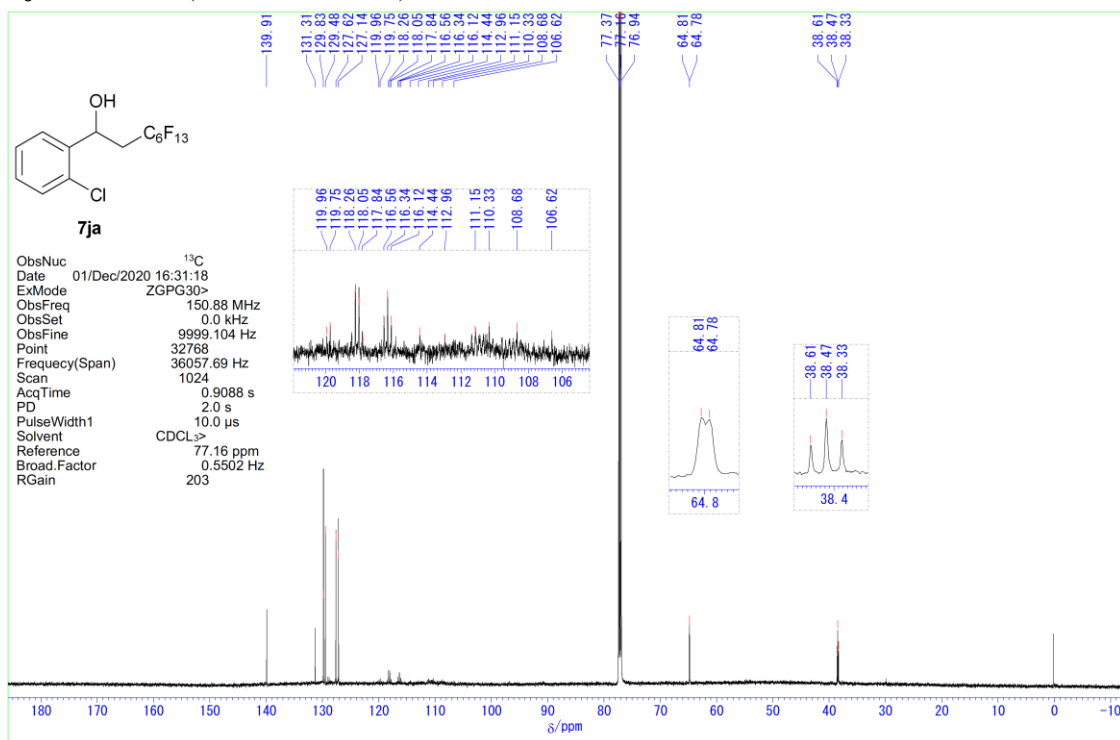

**7ja:**  $^{19}\text{F}$  NMR ( $\text{CDCl}_3$ , 471 MHz)

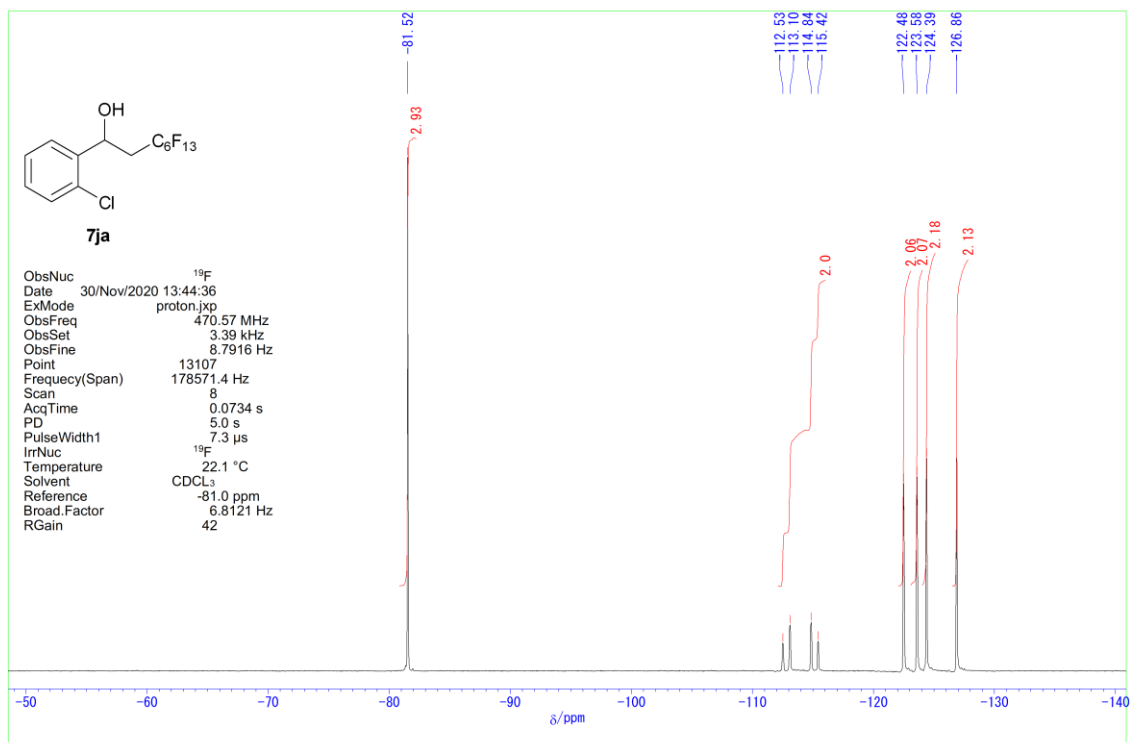

**7ka: <sup>1</sup>H NMR (CDCl<sub>3</sub>, 500 MHz)**

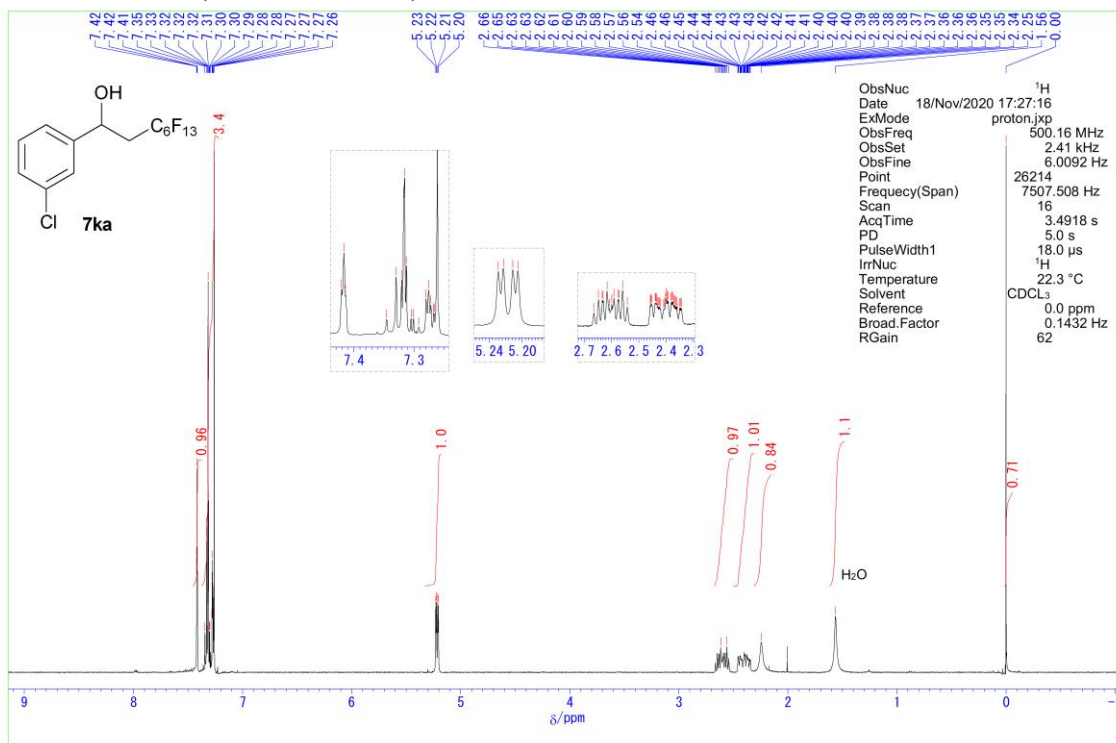

**7ka: <sup>13</sup>C NMR (CDCl<sub>3</sub>, 151 MHz)**

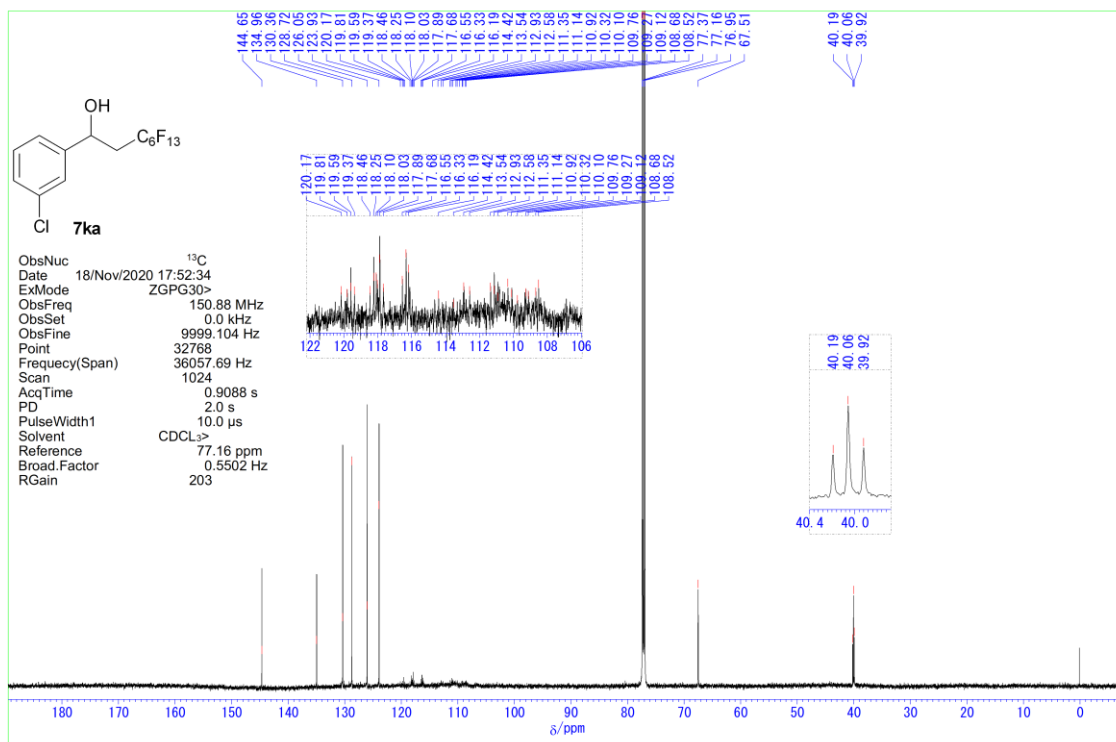



**71a:**  $^{13}\text{C}$  NMR ( $\text{CDCl}_3$ , 151 MHz)

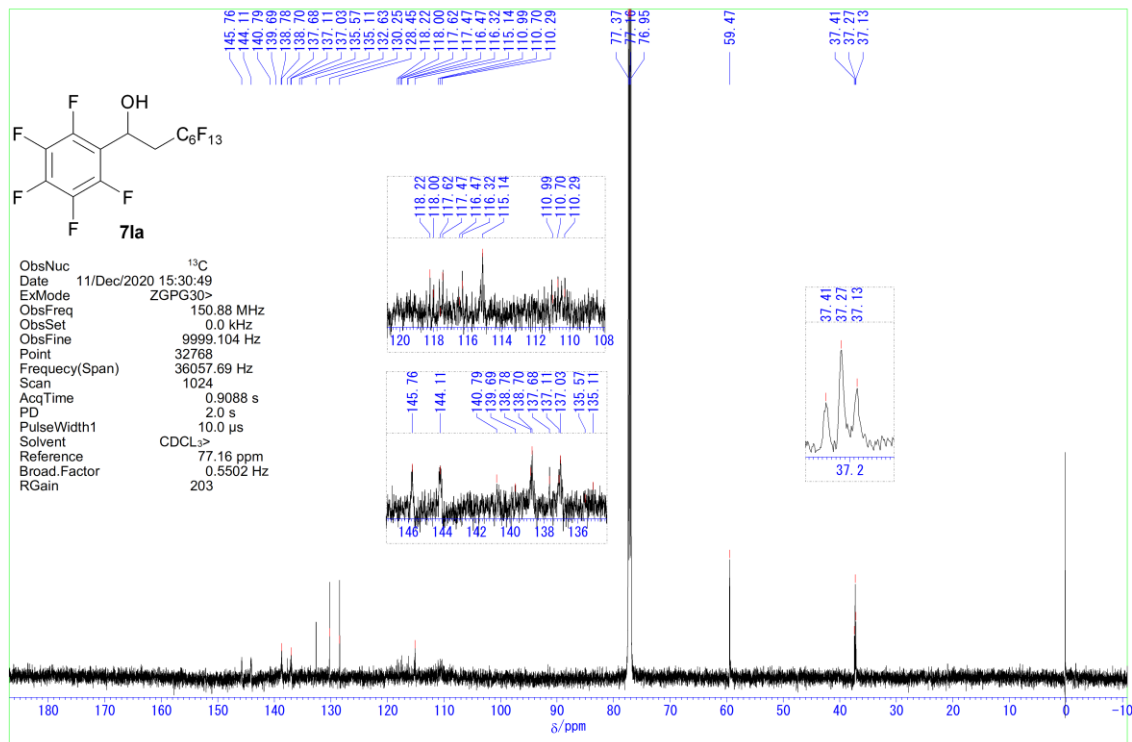

**71a:**  $^{19}\text{F}$  NMR ( $\text{CDCl}_3$ , 471 MHz)

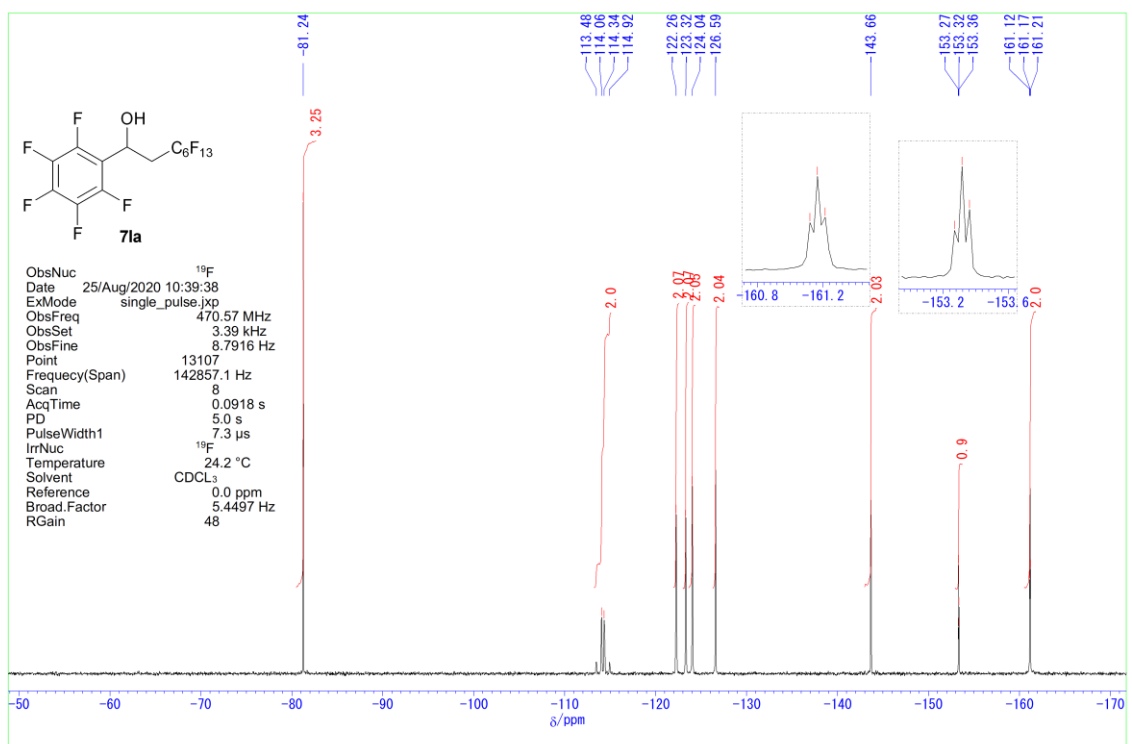

**7ma: <sup>1</sup>H NMR (CDCl<sub>3</sub>, 400 MHz)**

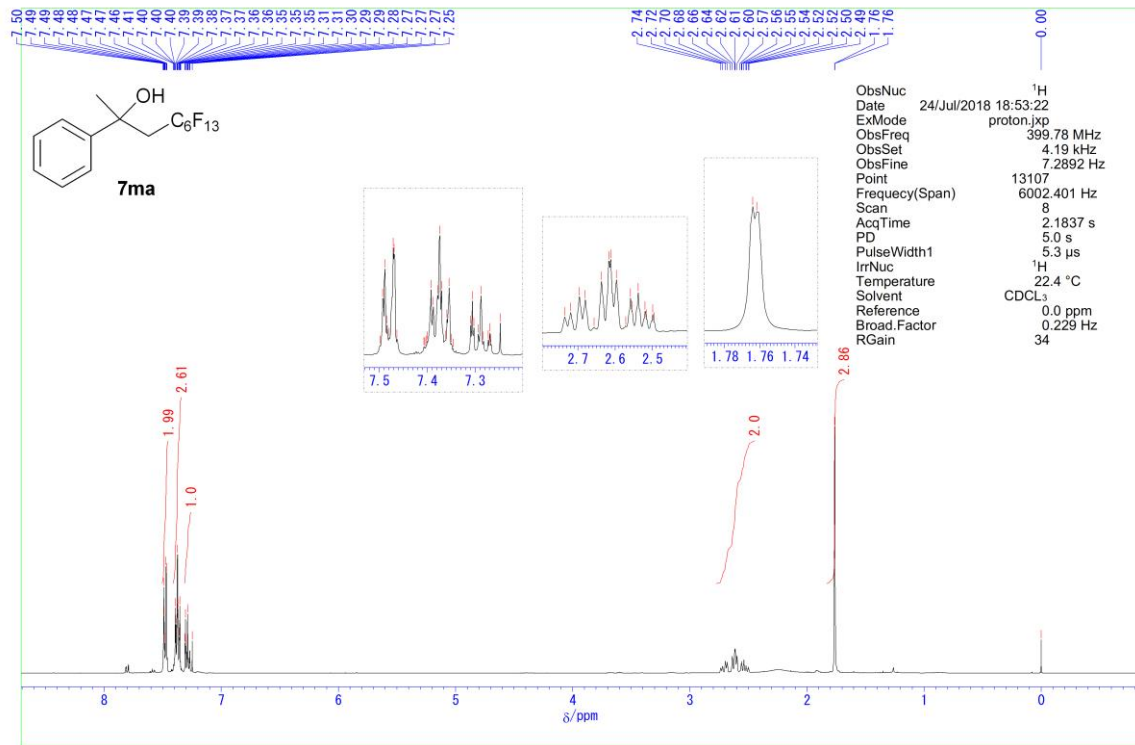

**7ma: <sup>13</sup>C NMR (CDCl<sub>3</sub>, 126 MHz)**

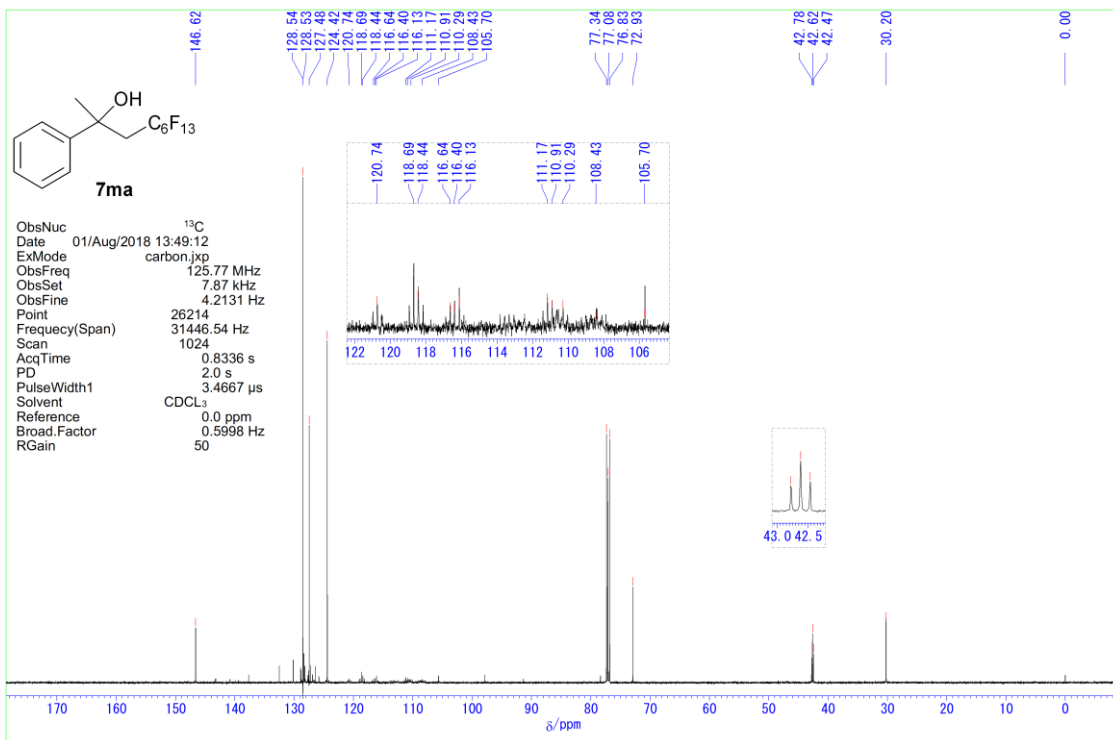

**7ma:**  $^{19}\text{F}$  NMR ( $\text{CDCl}_3$ , 376 MHz)

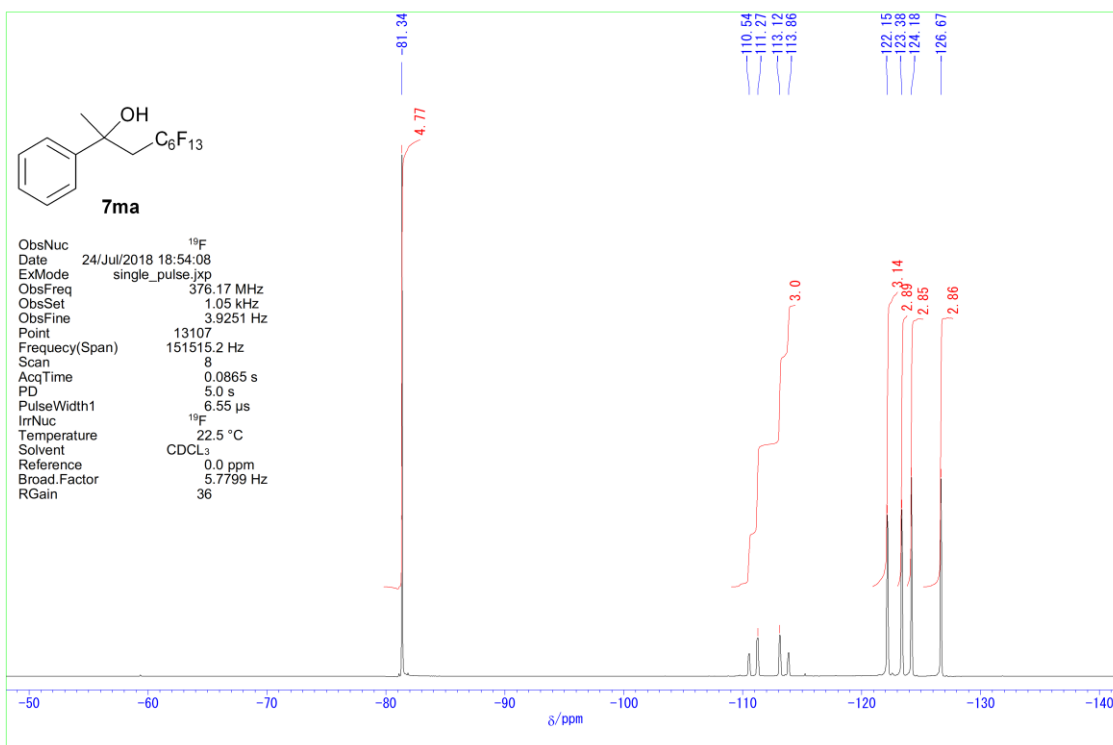

**7na:**  $^1\text{H}$  NMR ( $\text{CDCl}_3$ , 400 MHz)

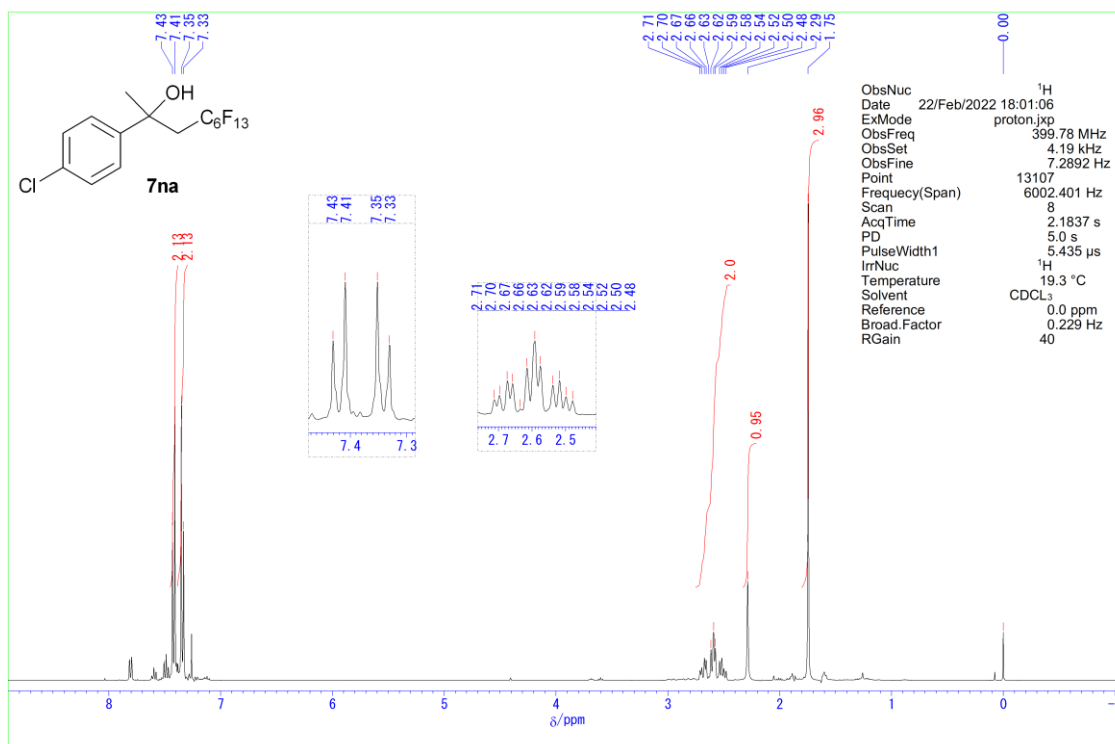





**7oa:**  $^1\text{H}$  NMR ( $\text{CDCl}_3$ , 400 MHz)

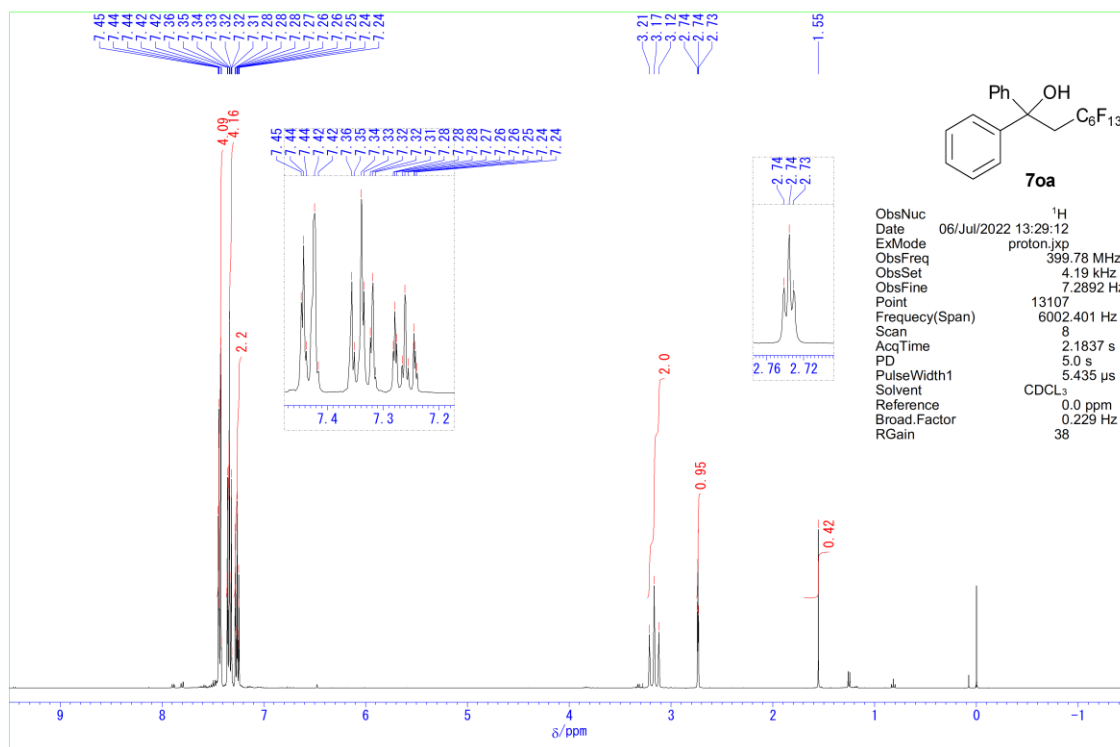

**7oa:**  $^{13}\text{C}$  NMR ( $\text{CDCl}_3$ , 151 MHz)

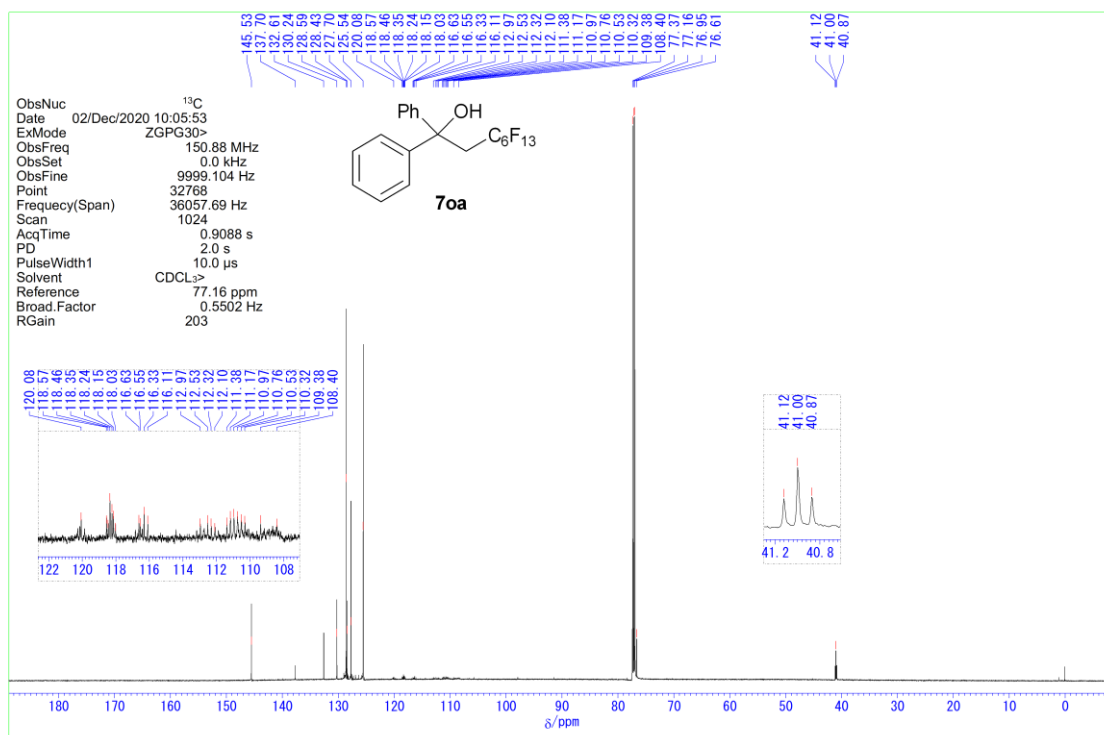

**7oa:**  $^{19}\text{F}$  NMR ( $\text{CDCl}_3$ , 376 MHz)

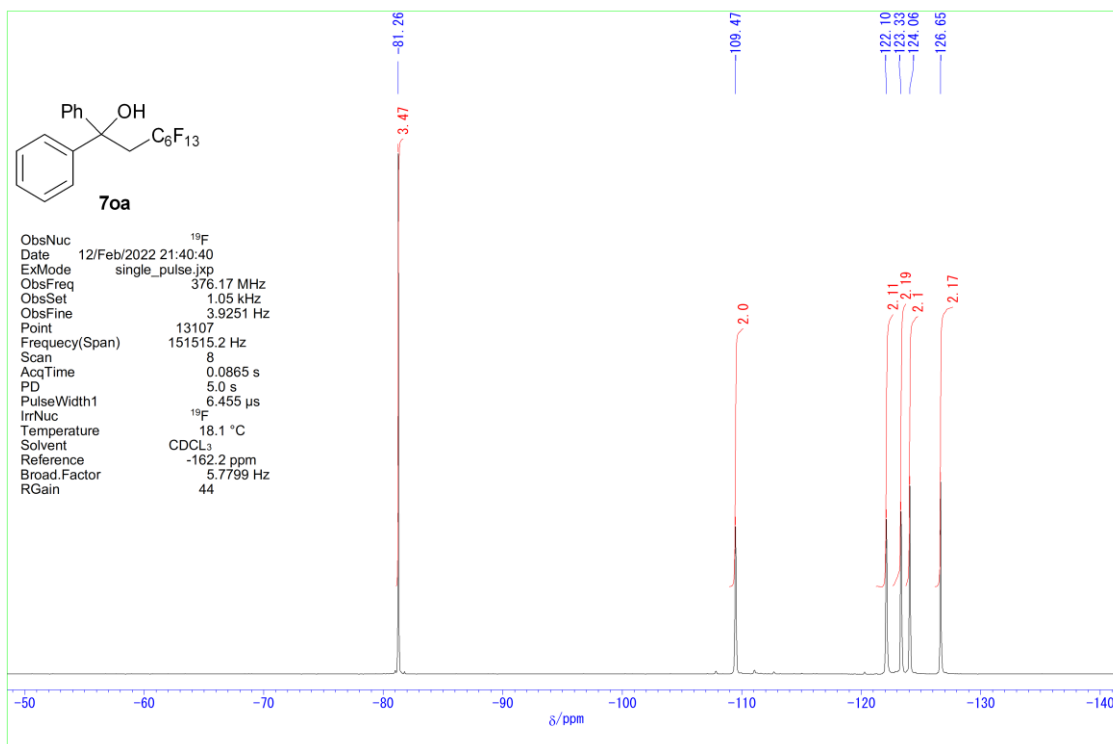

**7pa:**  $^1\text{H}$  NMR ( $\text{CDCl}_3$ , 400 MHz)

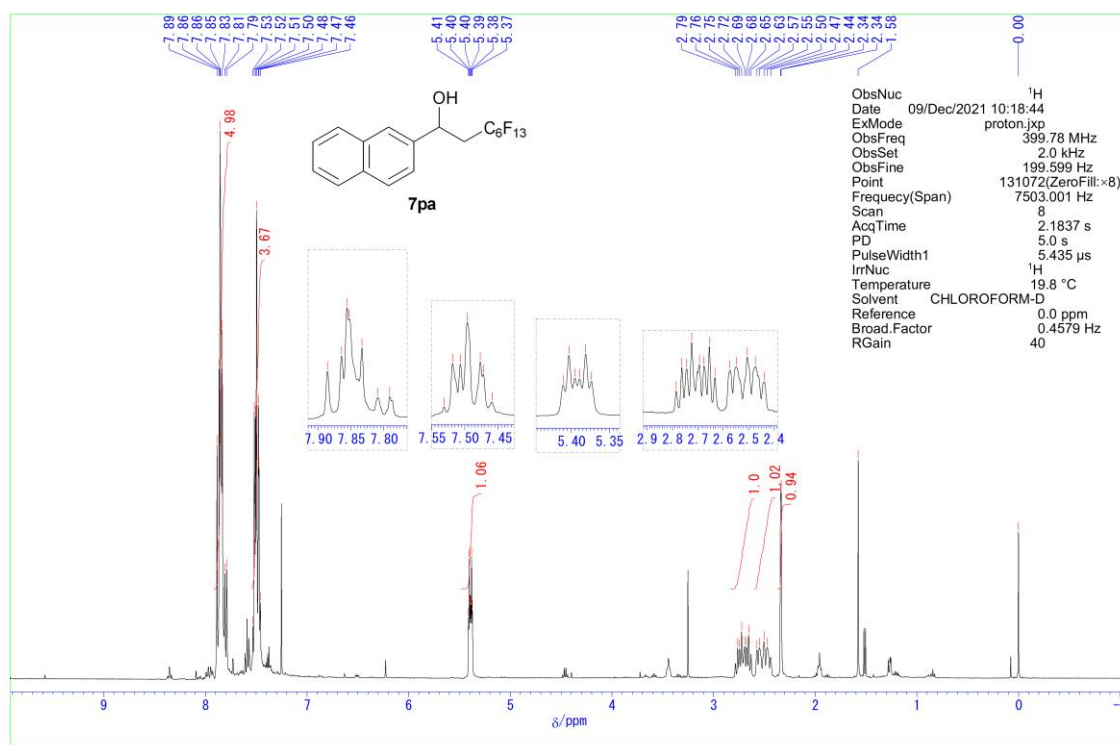

**7pa:**  $^{13}\text{C}$  NMR ( $\text{CDCl}_3$ , 151 MHz)

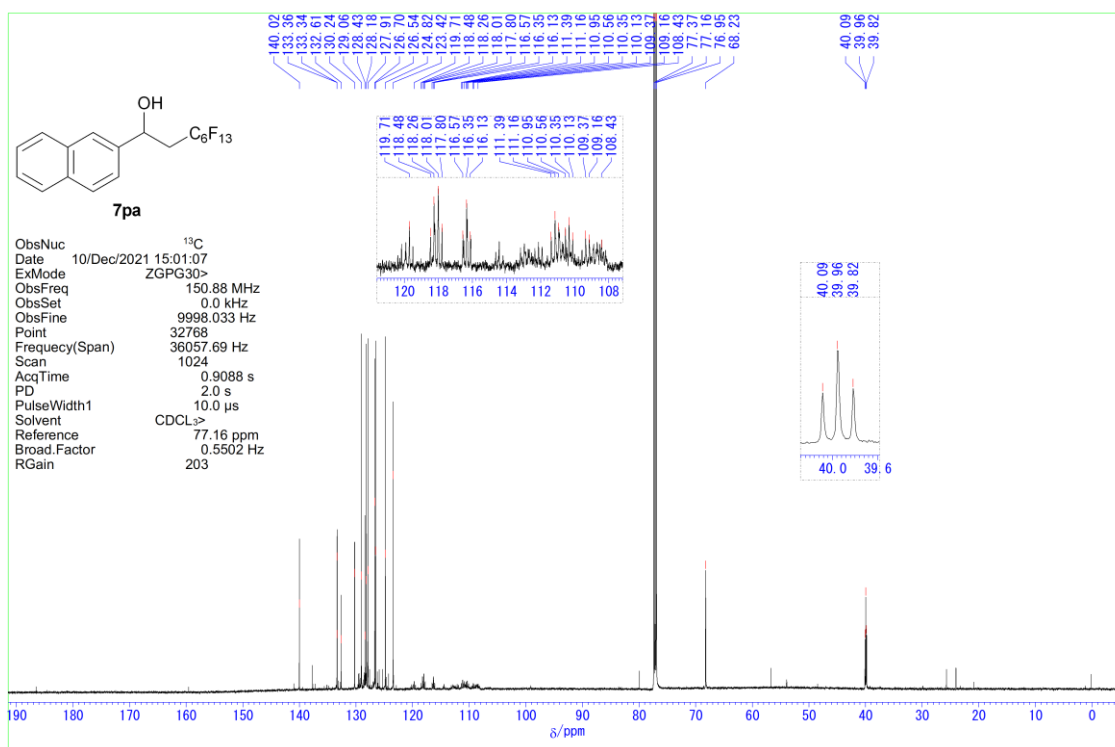

**7pa:**  $^{19}\text{F}$  NMR ( $\text{CDCl}_3$ , 376 MHz)

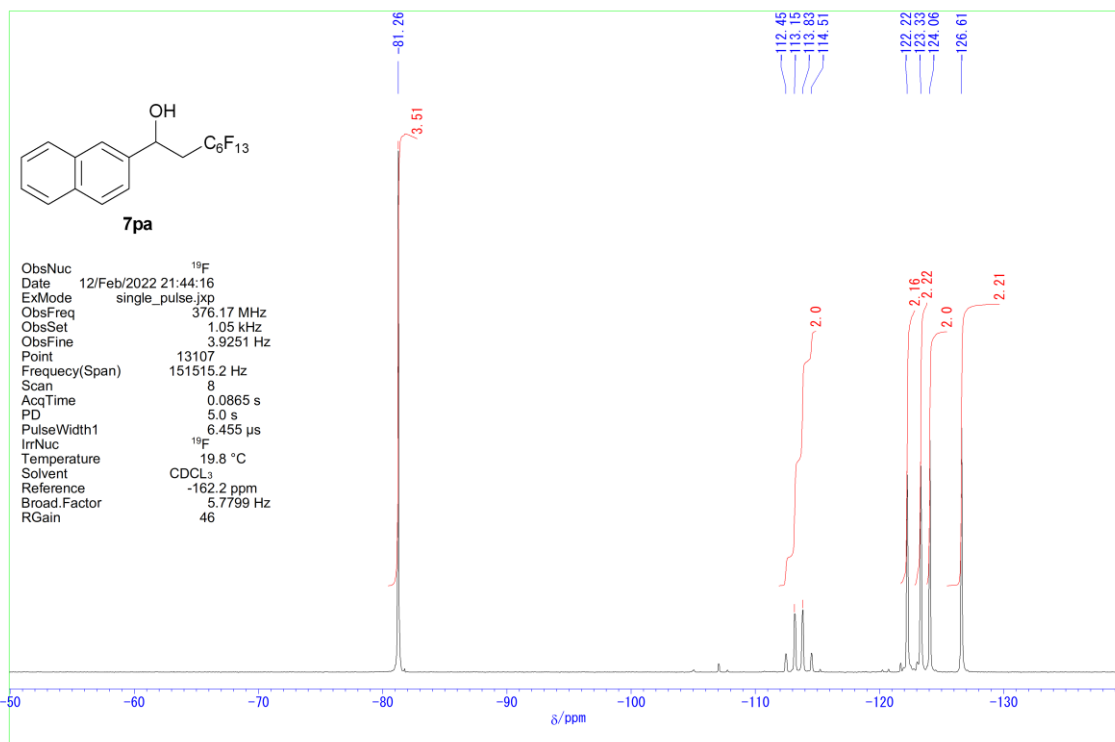

**7qa:**  $^1\text{H}$  NMR ( $\text{CDCl}_3$ , 500 MHz)

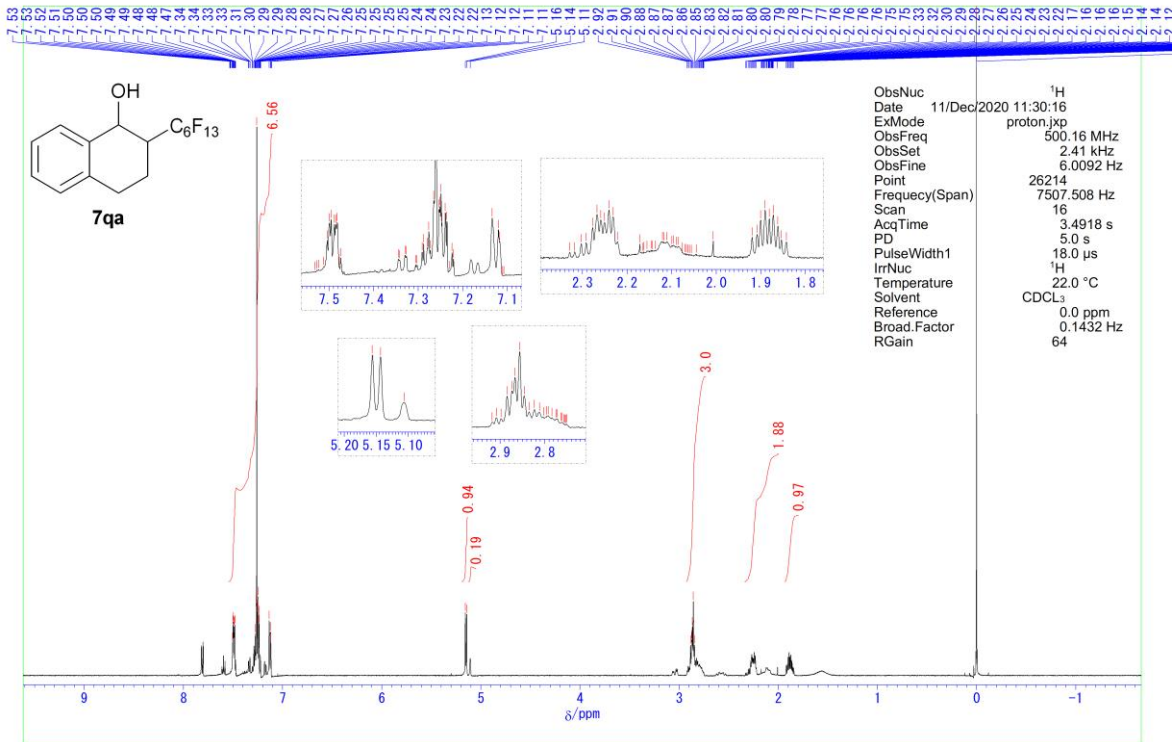

**7qa:**  $^{13}\text{C}$  NMR ( $\text{CDCl}_3$ , 151 MHz)

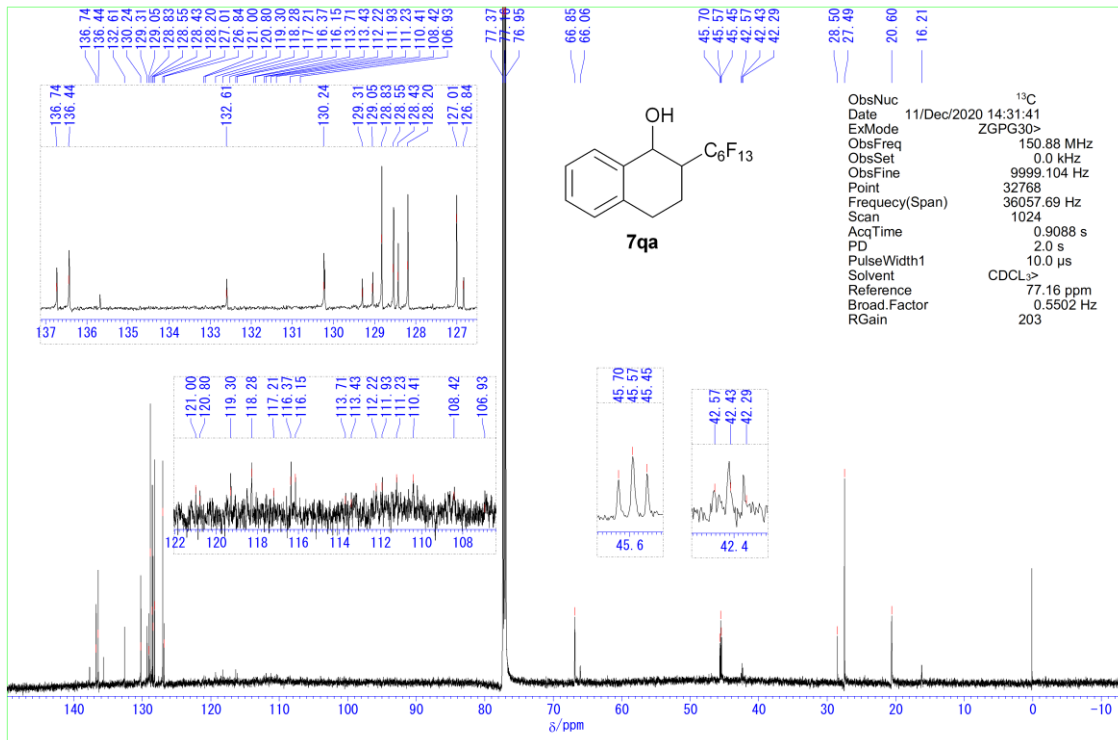

**7qa:**  $^{19}\text{F}$  NMR ( $\text{CDCl}_3$ , 471 MHz)

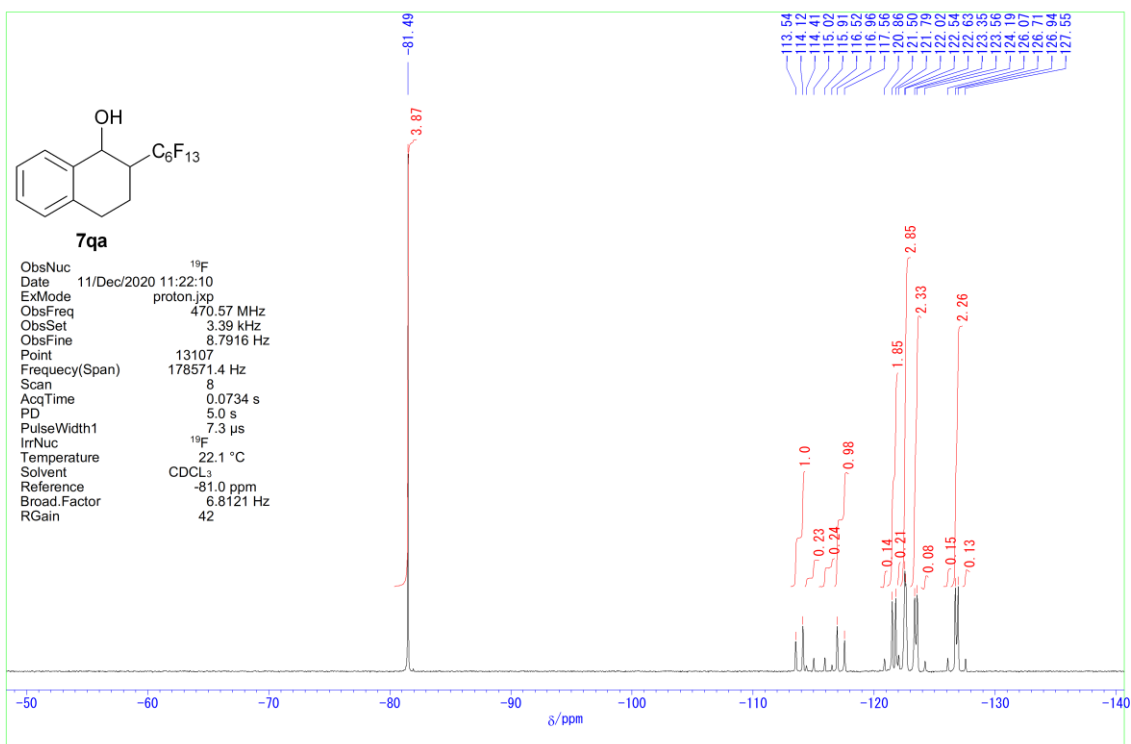

**7ra:**  $^1\text{H}$  NMR ( $\text{CDCl}_3$ , 500 MHz)

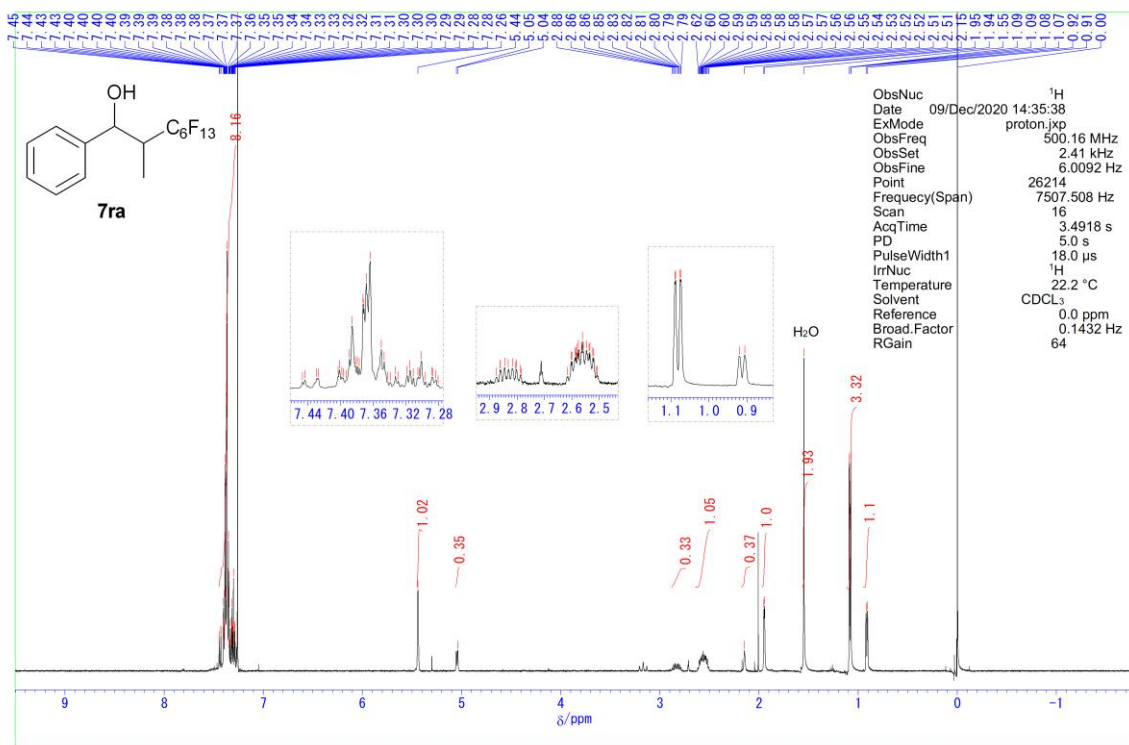

**7ra:**  $^{13}\text{C}$  NMR ( $\text{CDCl}_3$ , 151 MHz)

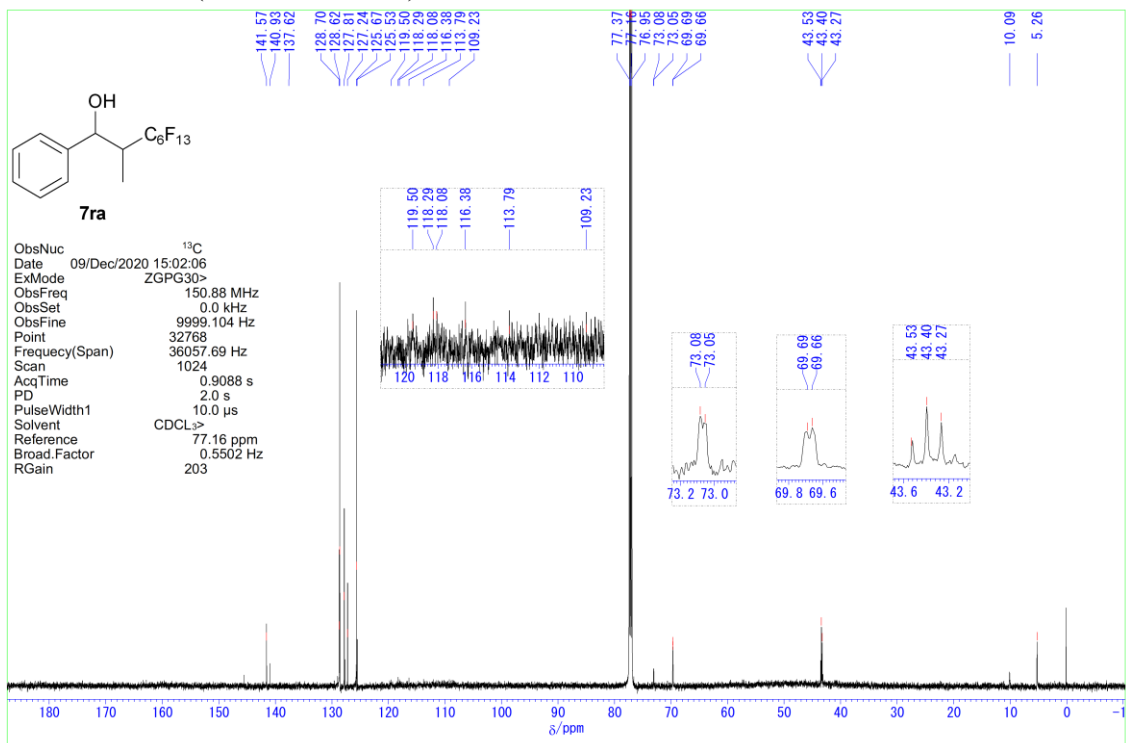

**7ra:**  $^{19}\text{F}$  NMR ( $\text{CDCl}_3$ , 471 MHz)

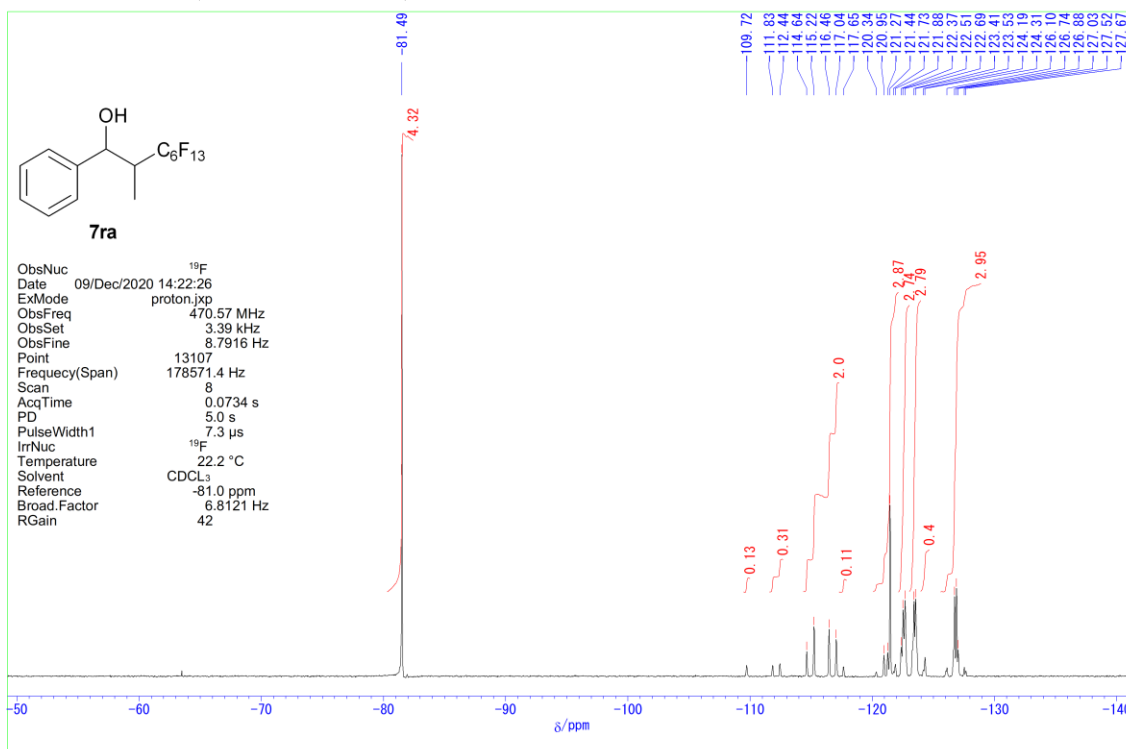

Supplement: d2ra06679c1.pdf [file d2ra06679c1.pdf]
